# Supplementary material for: Evaluating the reactivation of herpesviruses and inflammation as cardiovascular and cerebrovascular risk factors in antiretroviral therapy initiators in an African HIV-infected population (RHICCA): a protocol for a longitudinal cohort study
Source: PubMed Central journal article supplement (PMC6747662; doi:10.1136/bmjopen-2018-025576), 2019-09-12
Supplement: bmjopen-2018-025576.draft_revisions.pdf [file bmjopen-2018-025576.draft_revisions.pdf]

# BMJ Open

BMJ Open is committed to open peer review. As part of this commitment we make the peer review history of every article we publish publicly available.

When an article is published we post the peer reviewers' comments and the authors' responses online. We also post the versions of the paper that were used during peer review. These are the versions that the peer review comments apply to.

The versions of the paper that follow are the versions that were submitted during the peer review process. They are not the versions of record or the final published versions. They should not be cited or distributed as the published version of this manuscript.

BMJ Open is an open access journal and the full, final, typeset and author-corrected version of record of the manuscript is available on our site with no access controls, subscription charges or pay-per-view fees (<http://bmjopen.bmj.com>).

If you have any questions on BMJ Open's open peer review process please email [info.bmjopen@bmj.com](mailto:info.bmjopen@bmj.com)

# BMJ Open

**Protocol for a longitudinal cohort study to evaluate the reactivation of herpesviruses and inflammation as cardiovascular and cerebrovascular risk factors in antiretroviral therapy initiators, in an African HIV-infected population (RHICCA)**

|                               |                                                                                                                                                                                                                                                                                                                                                                                                                                                                                                                                                                                                                                                                                                                                                                                                                                                                                                                                                                                                                                                                                                                                                                                                                                                                                                                                                                                                                                                                                                                                        |
|-------------------------------|----------------------------------------------------------------------------------------------------------------------------------------------------------------------------------------------------------------------------------------------------------------------------------------------------------------------------------------------------------------------------------------------------------------------------------------------------------------------------------------------------------------------------------------------------------------------------------------------------------------------------------------------------------------------------------------------------------------------------------------------------------------------------------------------------------------------------------------------------------------------------------------------------------------------------------------------------------------------------------------------------------------------------------------------------------------------------------------------------------------------------------------------------------------------------------------------------------------------------------------------------------------------------------------------------------------------------------------------------------------------------------------------------------------------------------------------------------------------------------------------------------------------------------------|
| Journal:                      | <i>BMJ Open</i>                                                                                                                                                                                                                                                                                                                                                                                                                                                                                                                                                                                                                                                                                                                                                                                                                                                                                                                                                                                                                                                                                                                                                                                                                                                                                                                                                                                                                                                                                                                        |
| Manuscript ID                 | bmjopen-2018-025576                                                                                                                                                                                                                                                                                                                                                                                                                                                                                                                                                                                                                                                                                                                                                                                                                                                                                                                                                                                                                                                                                                                                                                                                                                                                                                                                                                                                                                                                                                                    |
| Article Type:                 | Protocol                                                                                                                                                                                                                                                                                                                                                                                                                                                                                                                                                                                                                                                                                                                                                                                                                                                                                                                                                                                                                                                                                                                                                                                                                                                                                                                                                                                                                                                                                                                               |
| Date Submitted by the Author: | 22-Jul-2018                                                                                                                                                                                                                                                                                                                                                                                                                                                                                                                                                                                                                                                                                                                                                                                                                                                                                                                                                                                                                                                                                                                                                                                                                                                                                                                                                                                                                                                                                                                            |
| Complete List of Authors:     | Peterson, Ingrid; Liverpool School of Tropical Medicine; Malawi Liverpool Wellcome Trust Clinical Research Programme<br>Ntsui, Ntobeko; University of Cape Town<br>Jambo, Kondwani; Liverpool School of Tropical Medicine; Malawi Liverpool Wellcome Trust Clinical Research Programme<br>Kelly, Christine; Malawi Liverpool Wellcome Trust Clinical Research Programme; University College Dublin<br>Huwa, Jacqueline; Malawi Liverpool Wellcome Trust Clinical Research Programme<br>Afran, Louise; Malawi Liverpool Wellcome Trust Clinical Research Programme<br>Tatuene, Joseph; University of Liverpool, Institute of Infection and Global Health; Malawi-Liverpool-Wellcome Trust Clinical Research Programme,<br>Pett, Sarah; University College London, Institute of Infection and Global Health; University of New South Wales, Kirby Institute<br>Henrion, Marc; Malawi Liverpool Wellcome Trust Clinical Research Programme; Liverpool School of Tropical Medicine<br>Van Ososterhout, Joep; University of Malawi College of Medicine; Dignitas International<br>Heyderman, Robert; University College London, Division of Infection and Immunity; University of Malawi College of Medicine, Malawi Liverpool Wellcome Trust Clinical Research Programme<br>Mwandumba, Henry; Liverpool School of Tropical Medicine; Malawi Liverpool Wellcome Trust Clinical Research Programme<br>Benjamin, Laura; University of Liverpool Institute of Infection and Global Health, ; University College London Institute of Neurology, |
| Keywords:                     | Ischaemic heart disease < CARDIOLOGY, EPIDEMIOLOGY, HIV & AIDS < INFECTIOUS DISEASES, Stroke medicine < INTERNAL MEDICINE                                                                                                                                                                                                                                                                                                                                                                                                                                                                                                                                                                                                                                                                                                                                                                                                                                                                                                                                                                                                                                                                                                                                                                                                                                                                                                                                                                                                              |
|                               |                                                                                                                                                                                                                                                                                                                                                                                                                                                                                                                                                                                                                                                                                                                                                                                                                                                                                                                                                                                                                                                                                                                                                                                                                                                                                                                                                                                                                                                                                                                                        |

SCHOLARONE™  
Manuscripts

BMJ OPEN

**Title:** Protocol for a longitudinal cohort study to evaluate the reactivation of herpesviruses and inflammation as cardiovascular and cerebrovascular risk factors in antiretroviral therapy initiators, in an African HIV-infected population (RHICCA)

**Authors:**

Ingrid Peterson<sup>1,2</sup>, Ntobeko Ntusi<sup>3</sup>, Kondwani C Jambo<sup>1,2</sup>, Christine Kelly<sup>1,4</sup>, Jacqueline Huwa<sup>1</sup>, Louise Afran<sup>1</sup>, Joseph Kamtchum-Tatuene<sup>5</sup>, Sarah Pett<sup>6,7,8</sup>, Marc Henrion<sup>1,2</sup>, Joep J van Oosterhout<sup>9,10</sup>, Robert Heyderman<sup>11</sup>, Henry C Mwandumba<sup>1,2</sup>, Laura Benjamin<sup>4,12\*\*</sup> and for the Investigators of the RHICCA study\*

**Affiliations:**

1. Malawi-Liverpool-Wellcome Trust Clinical Research Programme, University of Malawi College of Medicine
2. Department of Clinical Sciences, Liverpool School of Tropical Medicine
3. Department of Medicine, University of Cape Town
4. HIV Molecular Research Group, University College Dublin
5. Institute of Infection and Global Health, University of Liverpool
6. Institute of Global Health, University College London
7. MRC CTU at UCL, Institute of Medicine, Clinical Trials and Methodology, University College London
8. Kirby Institute, University of New South Wales, Australia
9. Dignitas International, PO Box 071, Zomba, Malawi
10. College of Medicine, University of Malawi
11. Department of Infection and Immunity, University College London
12. Department of Brain Repair and Rehabilitation, Institute of Neurology, UCL

1  
2  
3  
4  
5  
6  
7  
8  
9  
10  
11  
12  
13  
14  
15  
16  
17  
18  
19  
20  
21  
22  
23  
24  
25  
26  
27  
28  
29  
30  
31  
32  
33  
34  
35  
36  
37  
38  
39  
40  
41  
42  
43  
44  
45  
46  
47  
48  
49  
50  
51  
52  
53  
54  
55  
56  
57  
58  
59  
60

BMJ OPEN

\*The Investigators of the RHICCA study

Agbor Ako - Research and Development, GlaxoSmithKline

Brian Angus - Oxford Centre for Clinical Tropical Medicine, University of Oxford

Myles Connor - University of Edinburgh

Reena Dwivedi - Greater Manchester Neurosciences Centre, Salford Royal Foundation Trust

Lewis Haddow - Institute for Global Health, University College London

Terttu Heikinheimo-Connell - Hyvinkää Hospital, Department of Neurology, University of Helsinki

Elizabeth Joeques - Liverpool School of Tropical Medicine

Vanessa Kandoole - Department of Medicine, University of Malawi College of Medicine, Blantyre

Moffat Nyrienda - MRC Research Unit, Uganda

Kennedy Malisita- Department of Medicine, Queen Elizabeth Central Hospital

Jane Mallewa- Department of Medicine, University of Malawi College of Medicine, Blantyre

Elsayed Z. Soliman - School of Medicine, Wake Forest School of Medicine

Tom Solomon - Institute of Infection and Global Health, University of Liverpool

\*\*Corresponding author

Laura Benjamin

Institute of Infection and Global Health,

Ronald Ross building,

The University of Liverpool,

L69 7BE, Liverpool,

BMJ OPEN

United Kingdom

[l.benjamin@liverpool.ac.uk](mailto:l.benjamin@liverpool.ac.uk)

**Key words:**

Cardiovascular, cerebrovascular, HIV, herpesvirus, Immune dysregulation,

**Journal Guidance:**

Abstract word count: 300/300

Article word count: 3995 /4000

Figure/Table: 5/5

For peer review only

BMJ OPEN

**ABSTRACT**

**Introduction:** In Sub-Saharan Africa, rising rates of cerebrovascular and cardiovascular disease (CBD/CVD) are intersecting with an aging HIV-infected population. The widespread use of antiretroviral therapy (ART) may confer an additive risk and may not completely suppress the risk associated with HIV infection. High-quality prospective studies are needed to determine if HIV-infected patients in Africa are at increased risk of CBD/CVD and to identify factors associated with this risk. This study will test the hypothesis that immune activation and dysfunction, driven by HIV and reactivation of latent herpesvirus infections lead to increased CBD/CVD risk in Malawian adults aged  $\geq 35$  years.

**Methods and Analysis:** We will conduct a single-center 36-month prospective cohort study in 800 HIV-infected patients initiating antiretroviral therapy (ART) and 190 HIV-uninfected controls in Blantyre, Malawi. Patients and controls will be recruited from government ART clinics and the community, respectively and will be frequency-matched by 5-year age band and sex. At baseline and follow-up visits, we will measure carotid intima thickness (CIMT), pulse wave velocity (PWV) as surrogate markers of vasculopathy, and thus CBD/CVD risk. Our primary exposures of interest will be prospectively measured; these include cytomegalovirus and varicella zoster reactivation, changes in HIV plasma viral load, and markers of systemic inflammation and endothelial function. Multivariable regression models will be developed to assess the study's primary hypothesis. The occurrence of clinical CBD/CVD will be assessed as secondary study endpoints. ISRCTN registry <https://doi.org/10.1186/ISRCTN42862937>.

**Ethics and dissemination:** This was approved by the University of Malawi College of Medicine and the Liverpool School of Tropical Medicine research ethics committees. Our goal is to gain insight into the pathogenesis of cardiovascular and cerebrovascular disease among HIV cohorts on ART, in sub-Saharan Africa, and provide data to inform future interventional clinical trials. This study started in May 2017 and will continue until August 2020.

## STRENGTHS AND LIMITATIONS

- This is one of the first large-scale studies in Sub-Saharan Africa to explore the relationship between HIV infection, latent herpesviruses, inflammation and cardiovascular and cerebrovascular diseases, immediately after starting antiretroviral therapy (ART).
- Clinical events and death will be comprehensively reviewed through an end-point review committee, using strict diagnostic criteria for events based on those used in the INSIGHT network, or validated verbal autopsy for death with limited data.
- Because of the recent roll-out of ART in asymptomatic patients, there will be an absence of ART-naïve population, limiting our ability to explore the impact of ART.
- Approximately one-third of strokes will be asymptomatic. We anticipate not capturing some of these. However, multiple cerebral infarcts without a focal neurological deficit will manifest as cognitive impairment, which we will screen for, and corroborate with MRI imaging in a small number of cases.
- Two-thirds of myocardial infarction will be silent and could potentially be missed. In a nested group, we will use a digital electrocardiogram to evaluate this further.

BMJ OPEN

## INTRODUCTION

The growing epidemic of cerebrovascular disease (CBD e.g. Stroke) and cardiovascular disease (CVD e.g. myocardial infarction) now intersects with the HIV epidemic<sup>1</sup>. Countries like Malawi, have an adult HIV prevalence of approximately 10%<sup>2</sup>. There is an increased life expectancy among people living with HIV, largely because of the successful scale-up of ART<sup>3</sup>. In Europe and the US, HIV is associated with a 50% increased risk of CVD compared to HIV-uninfected populations<sup>4</sup>, attributable to long-term antiretroviral therapy (ART) use and HIV *per se*<sup>4,5</sup>. HIV infection is also associated with a 1.8 fold increased risk of all-cause heart failure in US veterans<sup>6</sup>. Our recent case-control study of stroke in Malawian adults is one of several examples that demonstrates a high risk of HIV infection associated with stroke and heart disease, pointing to a considerable and unappreciated CBD/CVD risk among HIV patients, in this setting<sup>7-10</sup>.

There are reports of geographical differences in the distribution of CVD risk factors, supporting the argument that evidence derived from high-income countries cannot be applied to Sub-Saharan (SSA)<sup>11</sup>. Addressing this knowledge gap is essential to the development of clinical drug trials for primary prevention of CBD/CVD among individuals living with HIV. Vasculopathy due to accelerated atherosclerosis, arterial stiffening and vasculitis are the major mechanisms believed to underlie the CBD/CVD burden<sup>12,13</sup>. It is hypothesized that despite viral suppression, low-grade HIV virus replication and the associated host systemic inflammation are important drivers of this vasculopathy (Figure 1). In patients receiving ART, HIV antigenemia, partly resulting from HIV persistence in sanctuary sites, incomplete virologic suppression and virologic resurgence, drives the chronic immune activation observed in about 20% of ART patients in SSA<sup>14</sup>. This immune state is characterized by ongoing activation and senescence of cell-mediated immunity<sup>15,16</sup>, increased monocyte/macrophage activation, stimulation of the interleukin-6 (IL-6) pathway and production of acute phase proteins<sup>17-19</sup>. Activation of the IL-6 pathway is established with atherosclerosis<sup>20,21</sup>, and may also contribute to non-atherosclerotic vasculopathy. Inflammation alone confers a 2-fold increased risk of clinical CBD/CVD events<sup>22</sup>. The current push to introduce more effective ART regimens, and to start treatment soon after HIV diagnosis is made, may reduce inflammation and in turn, CBD/CVD risk<sup>23</sup>. However, there is



BMJ OPEN

growing evidence of chronic inflammation in HIV despite achieving the goal of therapy, which is long-term suppression (<50 copies/mL) of plasma viral load, suggesting adjunctive therapy may be required.<sup>24-26</sup>

In addition to HIV, there is compelling evidence that reactivation of latent herpesviruses may be an important cause of vasculopathy. In HIV-uninfected elderly populations from high-income settings, latent cytomegalovirus (CMV) infection drives dysregulation of cell-mediated immunity<sup>15 27-29</sup>, not dissimilar to what's described in HIV-associated immune activation<sup>29</sup>. CMV and other viral proteins have been found in atherosclerotic plaques<sup>20</sup>. Varicella-zoster virus (VZV) can directly infect the vascular endothelium to cause vasculitis and subsequent stroke and was found to be the commonest opportunistic infection (prevalence 15%) in a study of HIV-infected stroke patients in Malawi<sup>12</sup>. The seroprevalence of herpesviruses is high in SSA<sup>30</sup>, particularly in HIV-infected populations<sup>16</sup>.

The involvement of herpesviruses in the mechanistic pathway for CBD/CVD is compelling and may offer additional therapeutic avenues, especially for CMV and VZV. However, our understanding is incomplete, and its population impact is yet to be defined. It is important to determine if, in addition to ART, there is a role for other pharmacological interventions targeting latent viral infections or downstream inflammatory pathways to reduce vasculopathy in HIV-infected patients on ART. Previous work from North America supports the potential of treating reactivated herpesviruses<sup>31</sup>. Furthermore, there are opportunities for intervention using the recently licensed Letermovir; a treatment for CMV. By focusing on HIV and Herpes viral antigenemia and immune dysregulation as mechanisms of vasculopathy, this study will identify subgroups of HIV-infected patients on ART at high risk of CBD/CVD, the timing of CBD/CVD risk in such patients, as well as potential targets for intervention.

BMJ OPEN

## STUDY OBJECTIVES

This study will test the hypothesis that immune activation and dysfunction, driven by HIV and reactivation of latent CMV/VZV herpesvirus infections lead to increased CBD/CVD risk in adults aged  $\geq 35$  years in SSA. We will address this through the following objectives;

- 1) To determine if progression of the surrogate marker of CBD/CVD or occurrence of new-onset vasculopathy is higher in adults aged  $\geq 35$  years with HIV infection on ART compared to those without HIV.
- 2) To determine if progression of surrogate markers of CBD/CVD or occurrence of new-onset vasculopathy is higher in adults aged  $\geq 35$  years with HIV/herpes viral antigenemia or chronic immune activation compared to those without HIV/herpes viral antigenemia or chronic immune activation. Specifically, we will determine if progression of surrogate markers or new-onset vasculopathy is higher:
  - a. in ART patients with reactivated latent herpes viral infection, compared to those without reactivated latent herpes viral infection.
  - b. in ART patients with the highest 25% of markers for immune activation, inflammation or endothelial activation compared to the bottom 25%
  - c. in ART patients with incomplete virologic suppression or virologic resurgence of HIV, compared to those with suppressed HIV plasma viral load.

The secondary study objectives are to determine if viral antigenemia or chronic immune activation increase occurrence of the following clinical events: 1) stroke, 2) myocardial infarction (MI), 3) angina (excluding MI), 4) peripheral vascular disease (PVD), 5) all-cause death/vascular-related death and 6) immune reconstitution inflammatory vasculopathy.

## METHODS AND ANALYSIS

### Study design

To address objective 1, we will conduct a single-center 36-month prospective cohort study in 800 HIV-infected patients initiating ART and 190 HIV-uninfected adults aged  $\geq 35$  years. HIV-infected and HIV-uninfected participants will be frequency matched by 5-year age band and sex. On a 6-monthly basis, we will measure markers of viral infection, inflammation and endothelial function along with surrogate markers for CBD/CVD (Figure 2).

BMJ OPEN

1  
2  
3 Study Setting

4 This study will recruit consecutive ART patients from the ART clinic of Queen Elizabeth  
5 Central Hospital (QECH), and ART clinics in several Blantyre City Community Health Centres  
6 (CHCs). These clinics collectively initiate over 100 HIV-infected patients aged  $\geq 35$  years onto  
7 ART each month. HIV-uninfected adults will be selected from pre-ART counseling sessions,  
8 and from randomly selected households in the community by two-stage random sampling  
9 (of households and individuals within households) from a previously enumerated sampling  
10 frame in the CHC catchment areas<sup>32</sup>. All study procedures will be conducted at QECH, which  
11 is located adjacent to the Malawi-Liverpool-Wellcome Trust Clinical Research Programme  
12 (MLW). QECH also hosts a 0.35T MRI imaging facility, which will contribute to characterizing  
13 our secondary endpoints.  
14  
15  
16  
17  
18  
19  
20  
21  
22

23 Study Participants

24 Study inclusion criteria will be: a) age  $\geq 35$  years and b) resident in Blantyre. HIV-infected  
25 patients must further be: c) ART-naïve or initiated ART <10 days prior to enrolment and d)  
26 initiating standard first-line ART (in Malawi this is: Tenofovir [TDF]/Lamivudine  
27 [3TC]/Efavirenz [EFV]). Adult controls must further be: e) HIV-uninfected. Study exclusion  
28 criteria are: f) clinical history of CBD/CVD, g) pregnancy, h) critical illness or symptomatic  
29 anemia at baseline and i) enrollment in an intervention study.  
30  
31  
32  
33  
34  
35  
36  
37

38 Justification of study inclusion and exclusion criteria is as follows; in many populations,  
39 CBD/CVD risk rises sharply from 35-years of age<sup>33</sup>, thus individuals aged 35 and older will be  
40 eligible (recruitment of participants aged 35 -39 will be limited to 15% of the study sample  
41 to avoid overrepresentation). Restricting recruitment by age will enable this study to have  
42 greater statistical power. For clarity of etiologic inference, the study will assess the risk of  
43 new-onset vasculopathy not associated with pregnancy and thus exclude patients who are  
44 pregnant or with a history of CBD/CVD. To eliminate confounding by ART regimen, patients  
45 must initiate on standard first-line ART (> 90% of ART patients in Blantyre do this). Critically  
46 ill patients are excluded primarily for ethical reasons.  
47  
48  
49  
50  
51  
52  
53  
54  
55  
56  
57  
58  
59  
60

BMJ OPEN

1  
2  
3 Laboratory methods  
4

5 ***Surface immunophenotyping of peripheral blood mononuclear cells***  
6

7 Immunophenotyping will be used to characterize peripheral blood mononuclear cells  
8 (PBMC) isolated from blood samples of HIV-uninfected and HIV-infected ART initiators.  
9 PBMCs will be harvested by density centrifugation using lymphoprep (Axis Shield, UK).  
10 PBMCs ( $2 \times 10^6$ ) will be stained with anti-CD45 PerCP CY5.5, anti-CD3 AF700, anti-CD4 BV421,  
11 anti-CD8 PE Dazzle, anti-CD38 BV605, anti-HLA-DR APC CY7, anti-CD57 APC, anti-PD1 PE CY7,  
12 anti-CTLA4 PE, and anti-CD223 FITC (all from eBiosciences, UK) to determine the expression  
13 of these markers on the surface of T-cells. In addition, ( $2 \times 10^6$ ) PBMCs stained with anti-CD16  
14 BV421, anti-CD14 PE, anti-HLA-DR PerCP CY5.5, anti-CD45 AF700, anti-CCR2 BV605, anti-  
15 CD11b APC, anti-CX3CR1 PE Dazzle and anti-CD38 FITC (all from eBiosciences, UK) will be  
16 used for monocytes. Dead cells, CD3<sup>+</sup> T-cells, and CD56<sup>+</sup> NK cells will be excluded using:  
17 LIVE/DEAD™ Fixable Aqua Dead Cell Stain (Thermofisher, UK), anti-CD3 BV503 and anti-  
18 CD56 BV503 (eBiosciences, UK), respectively. Stained cells will be acquired on a BD LSR  
19 Fortessa flow cytometer (Becton Dickinson, USA) and data will be analyzed using FlowJo  
20 software version 10.0 (Tree Star, San Carlos, CA). For each stained sample analyzed, the  
21 median fluorescence intensity (MFI) for each parameter will be normalized to its respective  
22 unstained control.  
23  
24  
25  
26  
27  
28  
29  
30  
31  
32  
33  
34  
35  
36  
37

38 ***Measurement of soluble markers of immune activation using multiplex bead array***  
39

40 A custom made multiplex assay will be used to assess soluble markers of monocyte  
41 activation (CD163), systemic inflammation (Interleukin-6) and endothelial activation  
42 (Intracellular adhesion molecule 1) in plasma, isolated from blood samples of HIV-  
43 uninfected and HIV-infected ART initiators. Following isolation, plasma will be aliquoted and  
44 stored at  $-80^{\circ}\text{C}$  until further use.  
45  
46  
47  
48  
49  
50  
51

52 ***Assessment of exposure to human cytomegalovirus and varicella zoster virus by ELISA***  
53

54 Quantitative VIDAS CMV IgG and IgM (BioMerieux, USA) and VZV glycoprotein IgG Low-Level  
55 Enzyme Immunoassay Kit [VaccZyme™EIA], will be used to determine exposure to these  
56  
57

BMJ OPEN

1  
2  
3 viruses using a commercial enzyme-linked immunosorbent assay (ELISA) platform. These kits  
4 will detect VZV antigen to a sensitivity and specificity of 97.8% and 96.8% respectively and  
5 for CMV, 97.2% and 100% for IgG and 100% and 97.4% for IgM respectively<sup>34 35</sup>. Plasma  
6 samples from HIV-uninfected and HIV-infected ART initiators stored at -80°C following  
7 collection will be used for these assessments  
8  
9  
10

### 11 12 13 14 **HIV**

15  
16 HIV infection will be diagnosed using two rapid tests in parallel, EIA rapid tests (Determine  
17 HIV-1/2 [Abbott Laboratories, USA] and Uni-Gold HIV [Trinity Biotech PLC, Ireland]), will be  
18 used as a tiebreak). HIV-1 RNA levels in plasma will be measured using the Abbott Real-Time  
19 HIV-1 assay with a lower limit of detection of 150 copies/mL (Abbott Molecular, Germany),  
20 according to the manufacturer's instructions. CD4+ T-cell count measurements will be  
21 performed using BD FACS Count machine (Partec platform).  
22  
23  
24  
25  
26  
27

### 28 Procedures

29 Carotid-femoral pulse wave velocity (PWV)<sup>36</sup> and carotid intima-media thickness (CIMT)<sup>37</sup>  
30 measurement will be performed in accordance with expert consensus guidelines, using a  
31 standardized study protocol on the Vicorder system (SMART Medical, UK) and Philips CX50  
32 machine (Philips healthcare, UK) respectively. CIMT measurements will be performed by  
33 three trained operators. The intra-class correlation coefficient will be used to assess the  
34 performance of the operators against that of a certified neurosonologist prior to study  
35 commencement.  
36  
37  
38  
39  
40  
41  
42  
43

### 44 Outcomes

#### 45 **Primary outcomes**

46  
47 Primary outcomes are the progression of surrogate markers of CBD/CVD, namely PWV and  
48 CIMT as well as the occurrence of new-onset vasculopathy defined by threshold values  
49 outlined in Table 1.  
50  
51  
52  
53  
54  
55  
56  
57  
58  
59  
60

BMJ OPEN

1  
2  
3  
4  
5  
6  
7  
8  
9  
10  
11  
12  
13  
14  
15  
16  
17  
18  
19  
20  
21  
22  
23  
24  
25  
26  
27  
28  
29  
30  
31  
32  
33  
34  
35  
36  
37  
38  
39  
40  
41  
42  
43  
44  
45  
46  
47  
48  
49  
50  
51  
52  
53  
54  
55  
56  
57  
58  
59  
60

For peer review only

BMJ OPEN

### ***Secondary outcomes***

Secondary outcomes are the following clinical events: 1) stroke, 2) myocardial infarction (MI), 3) unstable angina, 4) peripheral vascular disease (PVD), 5) all-cause death/vascular death and 6) immune reconstitution inflammatory syndrome (IRIS) vasculopathy (Table 1). Changes in PWV or endothelial activation at 6 months post ART initiation will be interpreted as a subclinical vascular IRIS event. These outcomes will be assessed through active surveillance in QECH inpatient wards for admissions of study participants. To improve capture of clinical outcomes, we will conduct brief telephone interviews with study participants about CBD/CVD symptoms and hospitalizations between study visits and facilitate unsolicited participant self-report. Clinical events and deaths in study participants will be reviewed by an independent endpoint review committee (ERC), comprising of clinicians experienced in Endpoint review. Each event will be reviewed and adjudicated by the ERC Chair and 2 ERC reviewers, using a standard set of diagnostic criteria (Table 1 and Supplement – S1). The format of reporting will be based on modifications of the [INSIGHT](#) network clinical diagnostic criteria. Deaths will be reviewed by the ERC using the CoDe approach<sup>23</sup>. For death with limited clinical data, a validated verbal autopsy will be performed to ascertain the cause<sup>38</sup>.

### **Exposures**

The exposure for Primary Objective 1 will be HIV status. Yearly HIV rapid tests in HIV-uninfected adults will be performed to exclude those with new HIV infections (Figure 2). Potential confounding and mediating factors will be recorded in study participants. This will include demographic factors, lifestyle and behavioral factors (e.g. cigarette smoking and alcohol consumption), chronic co-morbidities (i.e. hypertension, diabetes), cardiometabolic, renal and hematological factors (i.e. full blood count, creatinine in urine and serum, body-mass-index, waist-to-hip ratio, random glucose, HbA1c, and lipid profile). Blood pressure will be measured at all study visits. Although vascular immune reconstitution inflammatory syndrome (IRIS) (Table 1) will be considered as a primary endpoint, non-vascular IRIS will be defined as a risk factor. Where feasible, we will conduct PCR tests for common causes of IRIS in blood or cerebrospinal fluid (CSF) samples. Adherence to ART and change of ART regimen

BMJ OPEN

1  
2  
3 will be assessed at all study visits through extraction of data from 'ART master cards'; this is  
4 a government-supported monitoring tool used by all patients on ART, in Malawi.  
5  
6

7  
8 For Objective 2a-2c, markers of herpes and HIV viral antigenemia and immune inflammation  
9 will be measured according to the outline in Table 2. For primary objective 2a, reactivated  
10 latent herpes viral infections will be assessed by quantification of VZV, and CMV antibodies.  
11 We will estimate the risk of atherosclerosis and arterial stiffening associated with current  
12 herpesviruses reactivation at baseline, and sustained reactivation (i.e. those that continue  
13 to have a high titer from measurement at baseline to 6 months after ART initiation).  
14 Hyperactivation of B cells may result in an expansion of polyclonal antibodies and thus an  
15 overestimation of virus-specific antibody titers. To address this issue and make appropriate  
16 adjustments for hypergammaglobulinemia we will 1) measure more than one herpesviruses  
17 and 2) measure total IgG.  
18  
19  
20  
21  
22  
23  
24  
25  
26  
27

28 For primary objective 2b, markers of immune activation, inflammation, and endothelial  
29 activation will be measured (Figures 1 & 3). Quantitative cell surface immunophenotyping  
30 will be performed for CD4+ and CD8+ T-cell activation (e.g. HLA-DR) and senescence (e.g.  
31 CD57) in a subset of participants. In all study participants, at baseline, 6, 12, months, we will  
32 measure soluble markers associated with systemic inflammation and endothelial activation.  
33  
34  
35  
36  
37  
38

39 For primary objective 2c, incomplete viral response and viral rebound of HIV will be  
40 measured by quantitative PCR in patients on ART.<sup>39</sup> HIV viral load will be measured in  
41 patients on ART at 0, 6 and 12 months.  
42  
43  
44  
45  
46

#### 47 Data Collection Between May 2017 and August 2020

48  
49 The two-stage screening will be conducted to find and recruit potential study participants.  
50 A trained field worker will first screen to assess eligibility for criteria (a)-(c) in pre-ART  
51 counseling sessions, and in individuals from randomly selected households in the  
52 community. Eligible participants will then be referred to QECH to complete screening for  
53 criteria (d)-(i) and if eligible, consented to participate in the study. At study visits, a tablet-  
54  
55  
56  
57  
58  
59  
60



## BMJ OPEN

1  
2  
3 based, standardized Open Data Kit (ODK) case report form (CRF) will be administered in  
4 one-on-one interviews by a study nurse to capture demographic and clinical data. Study  
5 data will be collected as outlined in Table 2. Daily upload of electronic data will occur with  
6 oversight from the data manager at MLW. We will collect up to 30ml of whole blood. An  
7 ACR dipstick test will be used to test for creatinine, proteinuria, and glucosuria. In a subset  
8 of participants, an electrocardiogram supported by a digital platform and echocardiogram  
9 will be performed at baseline, 6 and 24 months, as well as in any participant experiencing a  
10 clinical event suggestive of a cardiac etiology. To facilitate the retention and clinical  
11 referrals of participants, contact will be made every 3 months to assess the occurrence of  
12 clinical events. Participants who miss a scheduled study visit will be contacted by phone  
13 and/or visited at home to assess their willingness to maintain their participation and to  
14 record intervening clinical events. Recording and definitions of other clinical events,  
15 including HIV associated events will be evaluated by the ERC chair. SMS messages will be  
16 used for appointment reminders. Technical appendix, statistical code, and dataset will be  
17 made available from a data repository, after publication of our work.  
18  
19  
20  
21  
22  
23  
24  
25  
26  
27  
28  
29  
30  
31

### 32 Sample Size and Statistical analysis

33  
34 The required sample size for the study's primary objectives is 800 HIV-infected patients and  
35 190 HIV-uninfected adults using standard, normal distribution approximation sample size  
36 formulas for comparing proportions in two groups of unequal size and based on the  
37 following assumptions: **a)** 18.4% of study participants have abnormal PWV at baseline. In  
38 our ongoing studies of vasculopathy in HIV-infected patients, 18.4% aged  $\geq 35$  years have a  
39 PWV ( $>12$  m/s), **b)** 20% of both HIV-infected patients and HIV-uninfected adults will be lost  
40 to follow-up, including by death and HIV sero-conversion<sup>40 41</sup>. **c)** The minimum relative risk  
41 (RR) of interest is 2 for Objective 1 and 1.8 for Objective 2. **d)** Cumulative risk of clinically  
42 significant vasculopathy over study follow-up is 18.4%. This is based on study data cited in  
43 (a). **e)** For objectives 2a)-c), the exposure prevalence for each risk factor is 20%. **f)** Statistical  
44 tests will have 80% power based on a 2-sided test with;  $\alpha=0.05$ . Testing of hypotheses for  
45 the secondary outcome will be exploratory. However, we estimate 26 strokes (4 mimics), an  
46 unknown number of MIs and 80 deaths occurring during the study<sup>7 42</sup>.  
47  
48  
49  
50  
51  
52  
53  
54  
55  
56  
57  
58  
59  
60

BMJ OPEN

1  
2  
3 The reporting of this study will be prepared in accordance with the STROBE guidelines<sup>43</sup>.  
4 Summary and descriptive statistics will be tabulated for all primary and secondary outcome  
5 variables, as well as for exposure variables and potential confounding or mediating factors.  
6  
7 Time plots for all outcome variables will be inspected. Quantitative data analysis will be  
8 conducted to assess the primary outcomes. The statistical analyses will slightly differ for the  
9 interim and the final analysis. While we will develop models that adjust for potentially  
10 confounding or mediating variables, we will also perform unadjusted analyses. At the  
11 interim analysis, the latter will be performed using t-tests or Wilcoxon signed rank tests  
12 (depending on whether the data are normally distributed or not) for PWV and Fisher's exact  
13 test for new-onset vasculopathy.  
14  
15  
16  
17  
18  
19  
20  
21

22 For primary objective 1, we will develop a total of 2 regression models at the interim  
23 analysis. A generalized linear regression model (GLM) will compare mean progression of  
24 arterial damage from baseline in HIV-infected patients and HIV-uninfected adults. This  
25 model will regress change from baseline in PWV on HIV status. A log link function may be  
26 used if required to satisfy model assumptions, otherwise, an identity link function will be  
27 used. We will develop a second model to estimate the risk ratio (RR) and population  
28 attributable fraction of new-onset vasculopathy in HIV-infected patients compared to HIV-  
29 uninfected adults. This will be a logistic model which regresses a binary factor for new-onset  
30 vasculopathy on HIV status in all participants without new-onset vasculopathy at baseline.  
31  
32 In the final analysis, we will repeat the analysis done at the interim stage but with the  
33 outcome at 24 months and develop another GLM, using CIMT as the response. Furthermore,  
34 we will extend the two GLM to linear mixed model (LMM) to account for the correlation in  
35 the data due to the repeated measurements for everyone. If a log link is necessary for the  
36 GLMs to satisfy model assumptions, we will develop marginal models using generalized  
37 estimating equations (GEEs) instead of the LMMs. In addition to the logistic regression  
38 models, differences in risk of new-onset vasculopathy between HIV-infected and HIV-  
39 uninfected adults will be assessed using time-to-event models adjusting for time-varying  
40 covariates and interval-censored outcomes as appropriate.  
41  
42  
43  
44  
45  
46  
47  
48  
49  
50  
51  
52  
53

54 For primary objective 2a, we will develop regression models to assess if progression of PWV  
55 and CIMT or occurrence of new-onset vasculopathy is higher in HIV-infected patients with a  
56  
57

BMJ OPEN

1  
2  
3 high viral burden. At the interim analysis, aGLM will be developed to compare mean  
4 progression of PWV in HIV-infected patients with and without reactivated latent herpes viral  
5 infection. This model will regress change from baseline in PWV on three log-transformed  
6 variables for antibody titer of CMV, and VZV. A logistic model will be used to estimate the  
7 RR and attributable fraction of new-onset vasculopathy in HIV-infected patients (without  
8 new-onset vasculopathy at baseline) with reactivated latent herpes viral infection compared  
9 to those without reactivated latent herpes infection. This model will regress a binary factor  
10 for new-onset vasculopathy on the two binary variables for herpesvirus reactivation at 0 and  
11 6 months. For the final analysis, the GLMs will be extended to LMMs (especially GEEs, if a  
12 log link is required) and risk of new-onset vasculopathy in the two groups will be assessed  
13 using time-to-event models.  
14  
15  
16  
17  
18  
19  
20  
21  
22

23 To assess if progression of PWV and CIMT is higher in HIV-infected patients with immune  
24 activation (primary objective 2b) we will develop, at the interim analysis, a GLM comparing  
25 mean progression of PWV in HIV-infected patients and levels of immune and inflammation  
26 markers. Initially, one model will be run for each marker, by regressing change in PWV on  
27 marker quantile in all HIV-infected patients. We will then work to develop a comprehensive  
28 model with multiple markers that are not highly correlated with one another. At final  
29 analysis, this will be repeated for both PWV and CIMT, with outcomes at 24 months. We will  
30 also again use LMMs or GEEs to make full use of the longitudinal nature of the data at final  
31 analysis.  
32  
33  
34  
35  
36  
37  
38  
39  
40

41 Modeling for primary objective 2c will be conducted in a similar fashion as described for  
42 primary objective 2a and 2b, by regressing factors for progression of vasculopathy from  
43 baseline and new onset vasculopathy on binary factors for incomplete viral response and  
44 viral resurgence. All models for primary objectives will include potential confounding  
45 variables and time of follow-up since baseline. Other modeling approaches will be used to  
46 examine important questions answerable by study data. For example, the time-to-event  
47 data models that will also be used to identify the time point of greatest vasculopathy risk in  
48 ART patients.  
49  
50  
51  
52  
53  
54  
55  
56  
57  
58  
59  
60

BMJ OPEN

1  
2  
3 For secondary study objectives, we will use univariate methods to assess the frequency of  
4 clinical events within exposure strata. If there is a sufficient number of clinical events we will  
5 develop logistic regression models for each clinical event type like primary objectives 1 and  
6  
7  
8 2. We will also analyze a binary variable for the occurrence of any of the study's secondary  
9  
10 outcomes, versus no such occurrence. As part of exploratory analyses, we will also aim to  
11 identify risk groups that are potentially incompletely captured with the measured exposure  
12 variables. We will perform unsupervised group-based multi-trajectory modeling of  
13 multivariate longitudinal patient trajectories to confirm any associations we have found  
14 using more traditional approaches<sup>44</sup>.  
15  
16  
17  
18  
19  
20  
21

## 22 **ETHICS AND DISSEMINATION**

23 Written informed consent will be obtained from all study participants, either written or  
24 witnessed verbal consent with thumbprint if the participant is non-literate. Study data will  
25 be maintained in an encrypted and password protected database to which only study staff  
26 will have access. Study participants who develop a clinical event will be managed, using the  
27 hospital guidelines, by our study clinician alongside the hospital doctor. Clinical data will be  
28 anonymized using unique identifying code. Study data will be kept for 10 years and then  
29 destroyed with a record, as recommended by good clinical practice guidelines. This protocol  
30 was approved by the ethics committees at University of Malawi College of Medicine  
31 (Protocol P02/16/1874) and the Liverpool School of Tropical Medicine (Protocol 16-014).  
32  
33  
34  
35  
36  
37  
38  
39  
40  
41  
42

## 43 **DISCUSSION**

44 African regions continue to bear the brunt of HIV infection, in 2013, an estimated 8.5 million  
45 adults were receiving ART<sup>45</sup>. As the landscape evolves, this population will live longer with  
46 stable HIV infection but likely remain at an increased risk of CBD/CVD compared to HIV-  
47 uninfected individuals of a similar age and sex. This study will be the first to determine the  
48 extent to which HIV reactivation of herpesvirus infection and inflammation contribute to  
49  
50  
51  
52  
53  
54  
55  
56  
57  
58  
59  
60  
60 CBD/CVD risk in an adult African population starting ART. The results of this work could

BMJ OPEN

1  
2  
3 potentially open avenues for novel anti-inflammatory and anti-viral interventions for the  
4 primary prevention of CBD/CVD in HIV populations in Africa.  
5  
6  
7

### 8 **Acknowledgments**

9  
10 The authors would like to thank the NCD Africa Open Lab of GlaxoSmithKline review  
11 committee for providing valuable advice for this protocol and the INSIGHT network for  
12 sharing their clinical endpoint criteria. LB is supported by an NIHR Clinical Lecturer  
13 Fellowship. SLP is supported by an MRC (UK) core funding MC\_UU\_12023/23.  
14  
15  
16  
17  
18  
19

### 20 **AUTHORS' CONTRIBUTIONS**

21  
22  
23 LB and IP developed the first draft. HM, NT, KJ, CK had major input for the revision of the  
24 second draft. All other authors subsequently contributed to the review of the manuscript.  
25  
26  
27  
28  
29

### 30 **FUNDING STATEMENT**

31  
32 Funding for this study was provided by the GlaxoSmithKline Africa Non-Communicable  
33 Disease Open Lab Grant (Project Number: 7964)  
34  
35  
36  
37  
38

### 39 **COMPETING INTERESTS**

40  
41 SLP has academic grants from Sysmex Corporation, Gilead Sciences, and ViiV Healthcare. All  
42 other authors have no competing interest.  
43  
44  
45  
46  
47  
48  
49  
50  
51  
52  
53  
54  
55  
56  
57  
58  
59  
60

BMJ OPEN

## REFERENCES

1. Roth GA, Johnson C, Abajobir A, et al. Global, Regional, and National Burden of Cardiovascular Diseases for 10 Causes, 1990 to 2015. *J Am Coll Cardiol* 2017;70(1):1-25. doi: 10.1016/j.jacc.2017.04.052
2. Organization WH. Global Update on HIV Treatment 2013: Results, Impact and Opportunities. WHO Report. Kuala Lumpur, Malaysia, 2013.
3. Macro NSONal. Malawi Demographic and Health Survey 2010. Zomba, Malawi, and Calverton, Maryland, USA: NSO and ICF Macro, 2010.
4. Freiberg MS, Chang CC, Kuller LH, et al. HIV infection and the risk of acute myocardial infarction. *JAMA Intern Med* 2013;173(8):614-22. doi: 10.1001/jamainternmed.2013.3728  
1659742 [pii] [published Online First: 2013/03/06]
5. Currier JS, Lundgren JD, Carr A, et al. Epidemiological evidence for cardiovascular disease in HIV-infected patients and relationship to highly active antiretroviral therapy. *Circulation* 2008;118(2):e29-35. doi: 10.1161/CIRCULATIONAHA.107.189624 [published Online First: 2008/06/21]
6. Butt AA, Chang CC, Kuller L, et al. Risk of heart failure with human immunodeficiency virus in the absence of prior diagnosis of coronary heart disease. *Archives of internal medicine* 2011;171(8):737-43. doi: 10.1001/archinternmed.2011.151 [published Online First: 2011/04/27]
7. Benjamin LA, Corbett EL, Connor MD, et al. HIV, antiretroviral treatment, hypertension, and stroke in Malawian adults: A case-control study. *Neurology* 2016;86(4):324-33. doi: 10.1212/WNL.0000000000002278
8. Allain TJ, Kinley L, Tsidyra B, et al. The spectrum of heart disease in adults in Malawi: A review of the literature with reference to the importance of echocardiography as a diagnostic modality. *Malawi Med J* 2016;28(2):61-65. [published Online First: 2016/11/30]
9. Soliman EZ, Juma H. Cardiac disease patterns in northern Malawi: epidemiologic transition perspective. *J Epidemiol* 2008;18(5):204-8. [published Online First: 2008/08/30]
10. Syed FF, Sani MU. Recent advances in HIV-associated cardiovascular diseases in Africa. *Heart* 2013;99(16):1146-53. doi: 10.1136/heartjnl-2012-303177 [published Online First: 2013/05/18]
11. Soliman EZ, Sharma S, Arasteh K, et al. Baseline cardiovascular risk in the INSIGHT Strategic Timing of AntiRetroviral Treatment (START) trial. *HIV Med* 2015;16 Suppl 1:46-54. doi: 10.1111/hiv.12233 [published Online First: 2015/02/26]
12. Benjamin LA, Allain TJ, Mzinganjira H, et al. The Role of Human Immunodeficiency Virus-Associated Vasculopathy in the Etiology of Stroke. *J Infect Dis* 2017;216(5):545-53. doi: 10.1093/infdis/jix340 [published Online First: 2017/09/22]
13. Benjamin LA, Bryer A, Lucas S, et al. Arterial ischemic stroke in HIV: Defining and classifying etiology for research studies. *Neurol Neuroimmunol Neuroinflamm* 2016;3(4):e254. doi: 10.1212/NXI.0000000000000254
14. Nakanjako D, Kiragga A, Ibrahim F, et al. Sub-optimal CD4 reconstitution despite viral suppression in an urban cohort on antiretroviral therapy (ART) in sub-Saharan Africa: frequency and clinical significance. *AIDS Res Ther* 2008;5:23. doi: 10.1186/1742-6405-5-23 [published Online First: 2008/10/30]
15. Pawelec G, Derhovanessian E. Role of CMV in immune senescence. *Virus Res* 2011;157(2):175-9. doi: 10.1016/j.virusres.2010.09.010 [published Online First: 2010/09/28]
16. Appay V, Sauce D. Immune activation and inflammation in HIV-1 infection: causes and consequences. *J Pathol* 2008;214(2):231-41. doi: 10.1002/path.2276 [published Online First: 2007/12/29]
17. Shaw AC, Joshi S, Greenwood H, et al. Aging of the innate immune system. *Curr Opin Immunol* 2010;22(4):507-13. doi: 10.1016/j.coi.2010.05.003 [published Online First: 2010/07/30]

## BMJ OPEN

18. Hearps AC, Angelovich TA, Jaworowski A, et al. HIV infection and aging of the innate immune system. *Sex Health* 2011;8(4):453-64. doi: 10.1071/SH11028 [published Online First: 2011/12/01]
19. Kovacs EJ, Palmer JL, Fortin CF, et al. Aging and innate immunity in the mouse: impact of intrinsic and extrinsic factors. *Trends Immunol* 2009;30(7):319-24. doi: 10.1016/j.it.2009.03.012 [published Online First: 2009/06/23]
20. Hansson GK. Inflammation, atherosclerosis, and coronary artery disease. *The New England journal of medicine* 2005;352(16):1685-95. doi: 10.1056/NEJMra043430 [published Online First: 2005/04/22]
21. Boekholdt SM, Stroes ES. The interleukin-6 pathway and atherosclerosis. *Lancet* 2012;379(9822):1176-8. doi: 10.1016/S0140-6736(12)60361-4 [published Online First: 2012/03/17]
22. Duprez DA, Neuhaus J, Kuller LH, et al. Inflammation, coagulation and cardiovascular disease in HIV-infected individuals. *PloS one* 2012;7(9):e44454. doi: 10.1371/journal.pone.0044454 [published Online First: 2012/09/13]
23. Lundgren JD, Babiker AG, Gordin F, et al. Initiation of Antiretroviral Therapy in Early Asymptomatic HIV Infection. *N Engl J Med* 2015;373(9):795-807. doi: 10.1056/NEJMoa1506816 [published Online First: 2015/07/21]
24. Eggena MP, Barugahare B, Okello M, et al. T cell activation in HIV-seropositive Ugandans: differential associations with viral load, CD4+ T cell depletion, and coinfection. *The Journal of infectious diseases* 2005;191(5):694-701. doi: 10.1086/427516 [published Online First: 2005/02/03]
25. Mussini CL, P.; Cozzi-Lepri,A.; Lapadula,G.; Marchetti,G.; Nicastri,E.; Cingolani,A.; Lichtner,M.;Antinori,A.; Gori,A.; Monforte, A. CD4/CD8 ratio normalisation and non-AIDS-related events in individuals with HIV who achieve viral load suppression with antiretroviral therapy: an observational cohort study. *Lancet HIV* 2015;2:e98–e106.
26. Sereti I, Krebs SJ, Phanuphak N, et al. Persistent, Albeit Reduced, Chronic Inflammation in Persons Starting Antiretroviral Therapy in Acute HIV Infection. *Clin Infect Dis* 2017;64(2):124-31. doi: 10.1093/cid/ciw683 [published Online First: 2016/10/16]
27. Brunner S, Herndler-Brandstetter D, Weinberger B, et al. Persistent viral infections and immune aging. *Ageing Res Rev* 2011;10(3):362-9. doi: 10.1016/j.arr.2010.08.003 [published Online First: 2010/08/24]
28. Moss P. The emerging role of cytomegalovirus in driving immune senescence: a novel therapeutic opportunity for improving health in the elderly. *Curr Opin Immunol* 2010;22(4):529-34. doi: 10.1016/j.coi.2010.07.001 [published Online First: 2010/08/06]
29. Appay V, Rowland-Jones SL. Premature ageing of the immune system: the cause of AIDS? *Trends Immunol* 2002;23(12):580-5. [published Online First: 2002/12/05]
30. Schaftenaar E, Verjans GM, Getu S, et al. High seroprevalence of human herpesviruses in HIV-infected individuals attending primary healthcare facilities in rural South Africa. *PloS one* 2014;9(6):e99243. doi: 10.1371/journal.pone.0099243 [published Online First: 2014/06/11]
31. Hunt PW, Martin JN, Sinclair E, et al. Valganciclovir reduces T cell activation in HIV-infected individuals with incomplete CD4+ T cell recovery on antiretroviral therapy. *J Infect Dis* 2011;203(10):1474-83. doi: 10.1093/infdis/jir060 [published Online First: 2011/04/20]
32. Corbett EL. Intensified HIV/TB prevention linking home-based HIV testing, including the option of selftesting, with HIV care. ISRCTN02004005. London: ISRCTN, 2012.
33. Roth GA, Huffman MD, Moran AE, et al. Global and regional patterns in cardiovascular mortality from 1990 to 2013. *Circulation* 2015;132(17):1667-78. doi: 10.1161/CIRCULATIONAHA.114.008720
34. Maple PA, Breuer J, Quinlivan M, et al. Comparison of a commercial Varicella Zoster glycoprotein IgG enzyme immunoassay with a reference time resolved fluorescence immunoassay (VZV TRFIA) for measuring VZV IgG in sera from pregnant women, sera sent for confirmatory



## BMJ OPEN

- 1  
2  
3 testing and pre and post vOka vaccination sera from healthcare workers. *J Clin Virol*  
4 2012;53(3):201-7. doi: 10.1016/j.jcv.2011.12.010 [published Online First: 2012/01/21]
- 5 35. Carlier P, Harika N, Bailly R, et al. Laboratory evaluation of the new Access (R) cytomegalovirus  
6 immunoglobulin IgM and IgG assays. *J Clin Virol* 2010;49(3):192-7. doi:  
7 10.1016/j.jcv.2010.07.024 [published Online First: 2010/08/31]
- 8 36. Laurent S, Cockcroft J, Van Bortel L, et al. Expert consensus document on arterial stiffness:  
9 methodological issues and clinical applications. *Eur Heart J* 2006;27(21):2588-605. doi:  
10 10.1093/eurheartj/ehl254 [published Online First: 2006/09/27]
- 11 37. Touboul PJ, Hennerici MG, Meairs S, et al. Mannheim carotid intima-media thickness and plaque  
12 consensus (2004-2006-2011). An update on behalf of the advisory board of the 3rd, 4th and  
13 5th watching the risk symposia, at the 13th, 15th and 20th European Stroke Conferences,  
14 Mannheim, Germany, 2004, Brussels, Belgium, 2006, and Hamburg, Germany, 2011.  
15 *Cerebrovasc Dis* 2012;34(4):290-6. doi: 10.1159/000343145  
16 000343145 [pii] [published Online First: 2012/11/07]
- 17 38. Serina P, Riley I, Stewart A, et al. Improving performance of the Tariff Method for assigning  
18 causes of death to verbal autopsies. *BMC Med* 2015;13:291. doi: 10.1186/s12916-015-0527-  
19 9 [published Online First: 2015/12/09]
- 20 39. Organization WH. Consolidated ARV guidelines 2013 [Available from:  
21 <http://www.who.int/hiv/pub/guidelines/arv2013/art/artmonitoring/en/index4.html>  
22 accessed 15 Oct 2015.
- 23 40. Misiri HE, Edriss A, Aalen OO, et al. Estimation of HIV incidence in Malawi from cross-sectional  
24 population-based sero-prevalence data. *Journal of the International AIDS Society*  
25 2012;15(1):14. doi: 10.1186/1758-2652-15-14 [published Online First: 2012/03/16]
- 26 41. MacPherson P, Houben RM, Glynn JR, et al. Pre-treatment loss to follow-up in tuberculosis  
27 patients in low- and lower-middle-income countries and high-burden countries: a systematic  
28 review and meta-analysis. *Bull World Health Organ* 2014;92(2):126-38. doi:  
29 10.2471/BLT.13.124800 [published Online First: 2014/03/14]
- 30 42. Walker R, Whiting D, Unwin N, et al. Stroke incidence in rural and urban Tanzania: a prospective,  
31 community-based study. *Lancet Neurol* 2010;9(8):786-92. doi: S1474-4422(10)70144-7 [pii]  
32 10.1016/S1474-4422(10)70144-7 [published Online First: 2010/07/09]
- 33 43. von Elm E, Altman DG, Egger M, et al. The Strengthening the Reporting of Observational Studies  
34 in Epidemiology (STROBE) Statement: guidelines for reporting observational studies.  
35 *International journal of surgery* 2014;12(12):1495-9. doi: 10.1016/j.ijvsu.2014.07.013  
36 [published Online First: 2014/07/22]
- 37 44. Nagin DS, Jones BL, Passos VL, et al. Group-based multi-trajectory modeling. *Stat Methods Med*  
38 *Res* 2018;27(7):2015-23. doi: 10.1177/0962280216673085 [published Online First:  
39 2018/05/31]
- 40 45. Organization WH. Global Update on the Health Sector Response to HIV 2014. Geneva: World  
41 Health Organization, 2014.  
42  
43  
44  
45  
46  
47  
48  
49  
50  
51  
52  
53  
54  
55  
56  
57  
58  
59  
60



BMJ OPEN

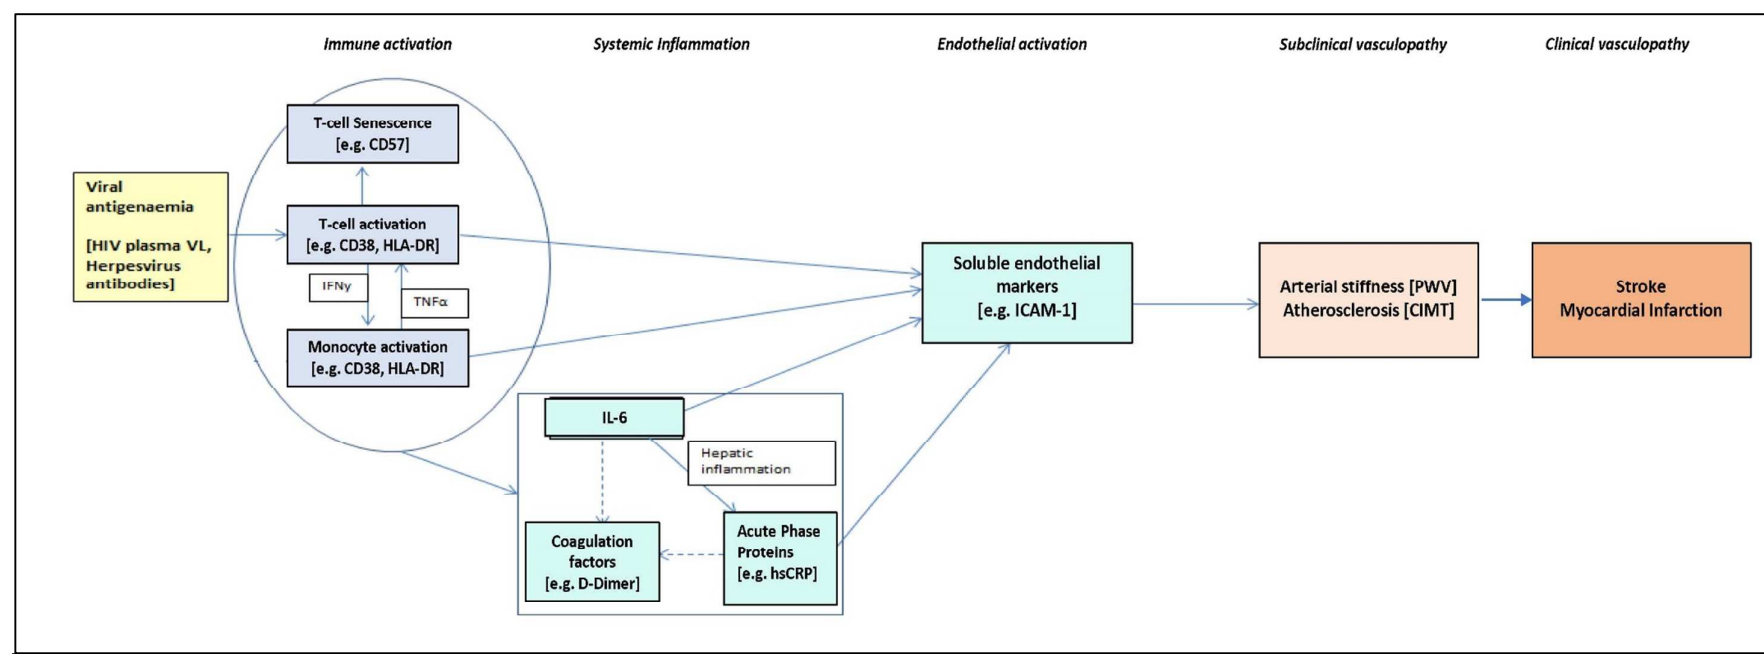

Figure 1. Hypothetical pathway of the interplay between chronic viruses, immune activation, systemic inflammation, endothelial activation, and vasculopathy.

KEY: VL- viral load, IL-6 – Interleukin 6, hsCRP – highly sensitive CRP, ICAM-1 – intracellular cell adhesion molecule 1, PWV – pulse wave velocity, CIMT – Carotid intimal medial thickness.

BMJ OPEN

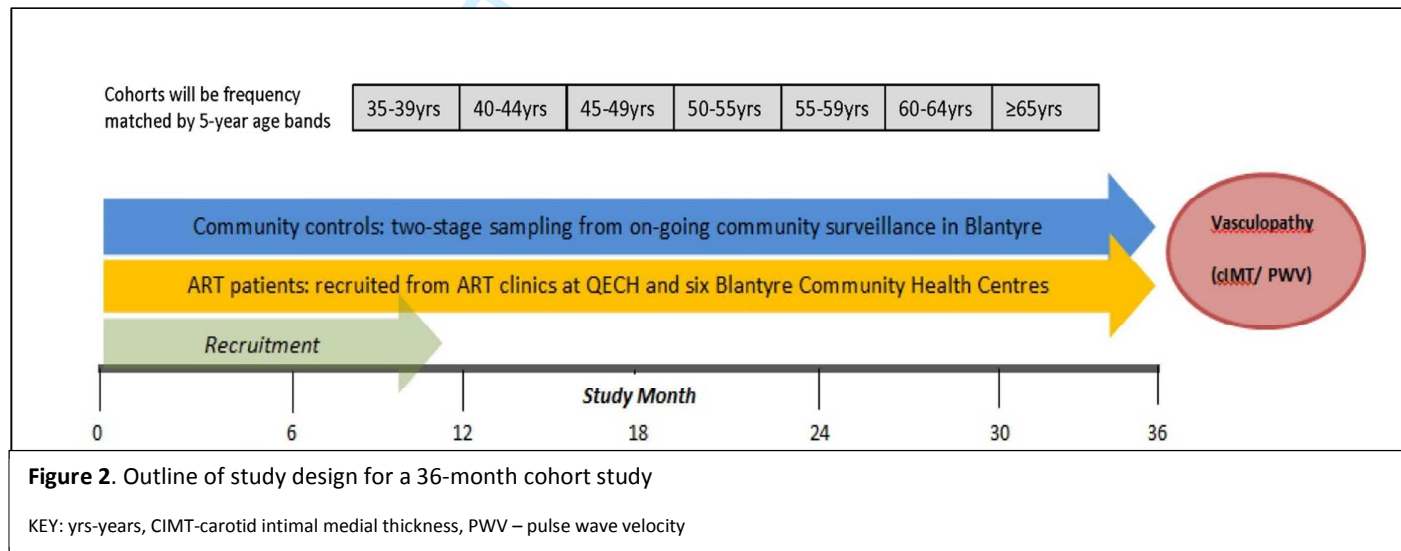

Table 1: Case definitions of primary and secondary endpoints for the study

|                                             | Type                                                                          | Definitions                                                                                                                                                                                                                                                                                                                                                                                                                                                                                                                                                                                                                                                                                                                                                                                                                                                                                                                                                                                                                                                                                                                                                                                                 |
|---------------------------------------------|-------------------------------------------------------------------------------|-------------------------------------------------------------------------------------------------------------------------------------------------------------------------------------------------------------------------------------------------------------------------------------------------------------------------------------------------------------------------------------------------------------------------------------------------------------------------------------------------------------------------------------------------------------------------------------------------------------------------------------------------------------------------------------------------------------------------------------------------------------------------------------------------------------------------------------------------------------------------------------------------------------------------------------------------------------------------------------------------------------------------------------------------------------------------------------------------------------------------------------------------------------------------------------------------------------|
| Primary Endpoint                            | Carotid intimal medial thickness (CIMT)                                       | <u>The occurrence of new-onset vasculopathy [CIMT – a measure of atherosclerosis]:</u><br>CIMT >0.9 mm or >75 <sup>th</sup> percentile of age/sex references values or presence of plaque on the carotid scan<br><br><u>Progression:</u> total change in CIMT at 24 months from baseline                                                                                                                                                                                                                                                                                                                                                                                                                                                                                                                                                                                                                                                                                                                                                                                                                                                                                                                    |
|                                             | Pulse wave velocity (PWV)                                                     | <u>Occurrence of new onset vasculopathy [PWV – a measure of arterial stiffness]:</u> PWV >12[m/s]<br><br><u>Progression:</u> total change in PWV at 24 months from baseline                                                                                                                                                                                                                                                                                                                                                                                                                                                                                                                                                                                                                                                                                                                                                                                                                                                                                                                                                                                                                                 |
| Secondary endpoint                          | Stroke                                                                        | <b>Confirmed (1+2) or 3 or 4 or 5:</b> <ol style="list-style-type: none"> <li>1. Acute onset with a clinically compatible course, including unequivocal objective findings of a localizing neurologic deficit</li> <li>2. CT or MRI compatible with a diagnosis of stroke and current neurologic signs and symptoms</li> <li>3. Stroke diagnosed as the cause of death at autopsy</li> <li>4. Compatible clinical history and positive lumbar puncture compatible with subarachnoid hemorrhage</li> <li>5. Death certificate or death note from medical record listing stroke as the cause of death</li> </ol>                                                                                                                                                                                                                                                                                                                                                                                                                                                                                                                                                                                              |
|                                             | Myocardial Infarction [MI]                                                    | <b>Confirmed: One of the following 5 criteria (adapted from 2007 Universal Definition of Myocardial Infarction): [1 + (2 or 3 or 6)] or 4 or 5</b> <ol style="list-style-type: none"> <li>1. Rise and/or fall of cardiac biomarkers (preferably troponin), with at least one value above the 99th percentile of upper reference limit (URL);</li> <li>2. The occurrence of a compatible clinical syndrome, including symptoms consistent with myocardial ischemia;</li> <li>3. ECG changes indicative of new ischemia (new ST-changes or new left bundle branch block [LBBB]), or development of pathological Q waves on the ECG;</li> <li>4. Sudden unexpected cardiac death involving cardiac arrest before biomarkers are obtained or before a time when biomarkers appear, along with (a) new ST-changes or new LBB, or (b) evidence of fresh thrombus on coronary angiography or at autopsy</li> <li>5. Pathologic findings of acute myocardial infarction (including acute MI demonstrated as the cause of death on autopsy)</li> <li>6. Development of a) evolving new Q waves, or b) evolving ST elevation, preferably based on at least 2 ECGs taken during the same hospital admission</li> </ol> |
|                                             | Coronary artery disease requiring drug treatment                              | <b>Confirmed (1 or 2) + 3:</b> <ol style="list-style-type: none"> <li>1. Evidence of myocardial ischemia based on either diagnostic imaging (such as a stress echocardiogram or thallium scan) or diagnostic changes on an electrocardiogram (such as during stress testing or an episode of chest pain)</li> <li>2. Evidence of coronary artery disease based on coronary angiography or other diagnostic imaging</li> <li>3. Use of medication given to treat or prevent angina (e.g., nitrates, beta blockers, calcium channel blockers)</li> </ol>                                                                                                                                                                                                                                                                                                                                                                                                                                                                                                                                                                                                                                                      |
|                                             | Peripheral vascular disease [PVD]                                             | <b>Confirmed (1+2) or (1+3):</b> <ol style="list-style-type: none"> <li>1. Compatible clinical signs and symptoms</li> <li>2. Positive results on diagnostic imaging studies (e.g., Doppler ultrasound, contrast arteriography, MRI arteriography);</li> <li>3. Ankle Brachial Pressure Index &lt; 0.90 in non-diabetics</li> </ol>                                                                                                                                                                                                                                                                                                                                                                                                                                                                                                                                                                                                                                                                                                                                                                                                                                                                         |
|                                             | Vascular Immune reconstitution syndrome (IRIS)                                | A new onset vasculopathy within 6 months of starting ART                                                                                                                                                                                                                                                                                                                                                                                                                                                                                                                                                                                                                                                                                                                                                                                                                                                                                                                                                                                                                                                                                                                                                    |
| All-cause death and vascular-related deaths | Death (of any or vascular cause) that occurs after recruitment into the study |                                                                                                                                                                                                                                                                                                                                                                                                                                                                                                                                                                                                                                                                                                                                                                                                                                                                                                                                                                                                                                                                                                                                                                                                             |

BMJ OPEN

| <b>Table 2. Laboratory tests and clinical procedures in ART patients and HIV-uninfected adults</b> |                   |          |           |           |           |           |           |
|----------------------------------------------------------------------------------------------------|-------------------|----------|-----------|-----------|-----------|-----------|-----------|
|                                                                                                    | Study Time Points |          |           |           |           |           |           |
|                                                                                                    | Baseline          | 6 months | 12 months | 18 months | 24 months | 30 months | 36 months |
| <b>Clinical Procedures</b>                                                                         |                   |          |           |           |           |           |           |
| PWV                                                                                                | X                 | X        | X         | X         | X         | X         | X         |
| CIMT                                                                                               | X                 |          |           |           | X         |           |           |
| ABPI                                                                                               | X                 | X        | X         | X         | X         | X         | X         |
| Cardiac Echo ( <i>participant sub-set</i> )                                                        | X                 |          |           |           | X         |           |           |
| ECG ( <i>participant sub-set</i> )                                                                 | X                 |          |           |           | X         |           |           |
| <b>Cardiometabolic markers</b>                                                                     |                   |          |           |           |           |           |           |
| Creatinine                                                                                         | X                 |          | X         |           | X         |           | X         |
| Cholesterol (LDL, HDL, Triglycerides)                                                              | X                 |          | X         |           | X         |           | X         |
| Serum glucose/HBA1C                                                                                | X                 |          | X         |           | X         |           | X         |
| <b>HIV Infection and Progression</b>                                                               |                   |          |           |           |           |           |           |
| HIV viral load ( <i>HIV patients</i> )                                                             | X                 | X        | X         |           |           |           |           |
| CD4 count ( <i>HIV patients</i> )                                                                  | X                 | X        | X         |           |           |           |           |
| HIV rapid test ( <i>controls</i> )                                                                 | X                 |          | X         |           | X         |           | X         |
| <b>Immune dysregulation</b>                                                                        |                   |          |           |           |           |           |           |
| Soluble markers of systemic inflammation                                                           | X                 | X        | X         |           |           |           |           |
| Soluble markers of endothelial activation                                                          | X                 | X        | X         |           |           |           |           |
| CD8 and CD4 T-cell activation and senescence ( <i>participant subset</i> )                         | X                 | X        | X         |           | X         |           | X         |
| Monocyte/ Macrophage activation and senescence ( <i>participant subset</i> )                       | X                 | X        | X         |           | X         |           | X         |
| <b>Herpesviruses infection</b>                                                                     |                   |          |           |           |           |           |           |
| CMV IgG                                                                                            | X                 | X        |           |           |           |           |           |
| VZV IgG                                                                                            | X                 | X        |           |           |           |           |           |

1  
2  
3  
4  
5  
6  
7  
8  
9  
10  
11  
12  
13  
14  
15  
16  
17  
18  
19  
20  
21  
22  
23  
24  
25  
26  
27  
28  
29  
30  
31  
32  
33  
34  
35  
36  
37  
38  
39  
40  
41  
42  
43  
44  
45  
46  
47

BMJ OPEN

For peer review only

# RHICCA – Clinical endpoint diagnostic criteria vs 3.5 Apr 2018

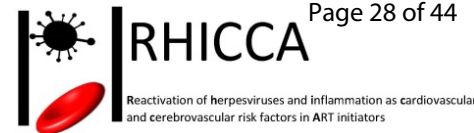

|                                           | CONFIRMED                                                                                                                                                                                                                                                                                                    | PROBABLE                                                                                                                                                                                                                                                                                                       |
|-------------------------------------------|--------------------------------------------------------------------------------------------------------------------------------------------------------------------------------------------------------------------------------------------------------------------------------------------------------------|----------------------------------------------------------------------------------------------------------------------------------------------------------------------------------------------------------------------------------------------------------------------------------------------------------------|
| <b>INFECTIONS</b>                         |                                                                                                                                                                                                                                                                                                              |                                                                                                                                                                                                                                                                                                                |
| Aspergillosis, invasive pulmonary         | <b>Confirmed: 1 + 2 + 3:</b><br>1. Compatible clinical course ( <b>Appendix 13</b> ),<br>2. CXR abnormality compatible with aspergillosis;<br>3. invasive mycelia consistent with Aspergillus on lung biopsy or positive culture of lung tissue or <b>positive culture of sputum</b> collected by any method | <b>Probable: 1 + 2 + 3:</b><br>1. Compatible clinical course ( <b>Appendix 13</b> ),<br>2. CXR abnormality compatible with aspergillosis;<br>3. invasive mycelia consistent with Aspergillus on tissue biopsy or positive culture at a normally sterile site (e.g., blood) apart from the lungs.               |
| Aspergillosis, other invasive             | <b>Confirmed: 1 + 2 + 3:</b><br>1. compatible clinical course ( <b>Appendix 11</b> ),<br>2. invasive mycelia consistent with Aspergillus on tissue biopsy or clinical evidence of infection,<br>3. positive culture from the affected tissue                                                                 | <b>Probable: 1 + 2:</b><br>1. clinical evidence of invasive infection ( <b>Appendix 11</b> ), 2. invasive mycelia consistent with Aspergillus on tissue biopsy or positive culture at a normally sterile site (e.g., blood) apart from the involved tissue                                                     |
| Bartonellosis                             | <b>Confirmed 1+ 2:</b><br>1. Clinical or histologic evidence of bacillary angiomatosis or bacillary peliosis,<br>2. a positive culture or PCR for <i>B. quintana</i> or <i>B. henselae</i>                                                                                                                   | <b>Probable 1 + 2:</b><br>1. Clinical evidence of bacillary angiomatosis or bacillary peliosis ( <b>Appendix 12</b> ),<br>2. positive silver stain for bacilli from a skin lesion or an affected organ                                                                                                         |
| Candidiasis, oral                         | <b>Confirmed: 1 + 2 + 3:</b><br>1. Macroscopic appearance on examination of the mouth<br>2. microscopic evidence of yeasts or pseudo hyphae<br>3. no evidence of oesophageal involvement                                                                                                                     | <b>Probable: 1 + 2 + 3:</b><br>1. a clinical diagnosis of oral candidiasis and/or microscopic evidence of yeasts or pseudo hyphae<br>2. clinical response to treatment<br>3. no evidence of oesophageal involvement                                                                                            |
| Candidiasis of bronchi, trachea, or lungs | <b>Confirmed: 1 + 2:</b><br>Macroscopic appearance at bronchoscopy or autopsy<br>microscopic evidence of yeasts or pseudo hyphae                                                                                                                                                                             | <b>None</b>                                                                                                                                                                                                                                                                                                    |
| Candidiasis, esophageal                   | <b>Confirmed: 1 + 2:</b><br>1. Macroscopic appearance at esophagoscopy or autopsy.<br>2. microscopic evidence of yeasts or pseudo hyphae                                                                                                                                                                     | <b>Probable: 1 + 2 + 3:</b><br>1. Recent onset of retrosternal pain or difficulty on swallowing.<br>2. a clinical diagnosis of oral candidiasis, endoscopic visualization of candidiasis and/or microscopic evidence of yeasts or pseudo hyphae from oropharyngeal mucosa<br>3. clinical response to treatment |

## RHICCA – Clinical endpoint diagnostic criteria vs 3.5 Apr 2018

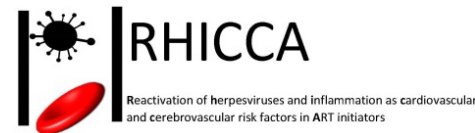

|                                                 | CONFIRMED                                                                                                                                                                                                                                                                                                | PROBABLE                                                                                                                                                                                                                                                                 |
|-------------------------------------------------|----------------------------------------------------------------------------------------------------------------------------------------------------------------------------------------------------------------------------------------------------------------------------------------------------------|--------------------------------------------------------------------------------------------------------------------------------------------------------------------------------------------------------------------------------------------------------------------------|
| <b>INFECTIONS (CONTINUED)</b>                   |                                                                                                                                                                                                                                                                                                          |                                                                                                                                                                                                                                                                          |
| Cryptococcosis, extrapulmonary (not meningitis) | <b>Confirmed: 1 or 2 or 3:</b><br><br>From tissue other than lung or hilum: <ol style="list-style-type: none"> <li>microscopic demonstration of narrow based budding yeast</li> <li>positive culture,</li> <li>antigen detection</li> </ol>                                                              | None                                                                                                                                                                                                                                                                     |
| Cryptococcosis meningitis                       | <b>Confirmed: 1 or 2 or 3 or 4:</b> <ol style="list-style-type: none"> <li>Brain histopathology microscopic demonstration of narrow based budding yeast</li> <li>CSF evidence of India ink test</li> <li>CSF evidence of positive culture</li> <li>CSF evidence of positive antigen detection</li> </ol> | None                                                                                                                                                                                                                                                                     |
| Cryptosporidiosis                               | <b>Confirmed: 1 + 2</b> <ol style="list-style-type: none"> <li>Diarrhea for &gt; 1 month</li> <li>positive microscopy</li> </ol>                                                                                                                                                                         | None                                                                                                                                                                                                                                                                     |
| CMV retinitis                                   | Autopsy demonstration                                                                                                                                                                                                                                                                                    | <b>Probable 1 + 2:</b> <ol style="list-style-type: none"> <li>Typical appearance on fundoscopy of discrete patches of retinal whitening, spreading along blood vessels.</li> <li>Associated vasculitis, hemorrhage and necrosis, confirmed by ophthalmologist</li> </ol> |

|                                                | CONFIRMED                                                                                                                                                                                                                                                                                                                                | PROBABLE                                                                                                                                                                                                                                                                                     |
|------------------------------------------------|------------------------------------------------------------------------------------------------------------------------------------------------------------------------------------------------------------------------------------------------------------------------------------------------------------------------------------------|----------------------------------------------------------------------------------------------------------------------------------------------------------------------------------------------------------------------------------------------------------------------------------------------|
| <b>INFECTIONS (CONTINUED)</b>                  |                                                                                                                                                                                                                                                                                                                                          |                                                                                                                                                                                                                                                                                              |
| HZV single dermatome                           | <b>Confirmed 1+2:</b> <ol style="list-style-type: none"> <li>multiple ulcerated lesions affecting at least 1 dermatome, and/or 1 or more contiguous dermatomes;</li> <li>positive culture, PCR, or antigen assay from affected tissue</li> </ol>                                                                                         | <b>Probable 1 + 2:</b> <ol style="list-style-type: none"> <li>multiple typical ulcerated lesions affecting at Least 1 dermatome, and/or 1 or more contiguous dermatomes;</li> <li>response to an antiviral active against HZV unless resistance is demonstrated</li> </ol>                   |
| HZV, disseminated                              | <b>Confirmed 1+2:</b> <ol style="list-style-type: none"> <li>multiple ulcerated lesions affecting at least 2 non-contiguous dermatomes, or with generalized cutaneous dissemination HZV involvement of the lung, liver, brain, or other internal organs</li> <li>positive culture, PCR, or antigen assay from affected tissue</li> </ol> | <b>Probable 1+2:</b> <ol style="list-style-type: none"> <li>multiple typical ulcerated lesions affecting at least 2 non-contiguous dermatomes, or with generalized cutaneous dissemination</li> <li>response to an antiviral active against HZV unless resistance is demonstrated</li> </ol> |
| HSV mucocutaneous ulceration                   | <b>Confirmed 1 +2:</b> <ol style="list-style-type: none"> <li>Ulceration for &gt; 1 Month</li> <li>Histology, culture, PCR, or detection of antigen from affected tissue</li> </ol>                                                                                                                                                      | <b>Probable 1 + 2:</b> <ol style="list-style-type: none"> <li>Typical HSV ulceration for &gt; 1 month,</li> <li>response to an antiviral active against HZV unless resistance is demonstrated</li> </ol>                                                                                     |
| Histoplasmosis, disseminated or extrapulmonary | <b>Confirmed 1+2:</b> <ol style="list-style-type: none"> <li>Compatible symptoms,</li> <li>histology or culture or elevated blood or urine antigen levels</li> </ol>                                                                                                                                                                     | None                                                                                                                                                                                                                                                                                         |
| Isosporiasis                                   | <b>Confirmed 1 + 2:</b> <ol style="list-style-type: none"> <li>Diarrhea for &gt; 1 month</li> <li>microscopic identification of <i>Isospora belli</i></li> </ol>                                                                                                                                                                         | None                                                                                                                                                                                                                                                                                         |

# RHICCA – Clinical endpoint diagnostic criteria vs 3.5 Apr 2018

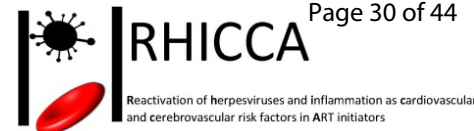

|                                                   |                                                                                                                                                                |                                                                                                                                                                                                                       |
|---------------------------------------------------|----------------------------------------------------------------------------------------------------------------------------------------------------------------|-----------------------------------------------------------------------------------------------------------------------------------------------------------------------------------------------------------------------|
| Microsporidiosis                                  | <b>Confirmed 1 + 2:</b><br>1.Diarrhea for > 1 month<br>2.Microscopic identification of Microsporidia                                                           | None                                                                                                                                                                                                                  |
| MAC and other mycobacterial disseminated diseases | <b>Confirmed 1 + 2:</b><br>1. Fever, fatigue, anemia or diarrhea<br>2. positive culture from blood, body fluids or tissue other than pulmonary, hilar or stool | <b>Probable 1+2+3:</b><br>1. Fever, fatigue, anemia or diarrhea<br>2. <b>AFB</b> or positive direct MAC PCR in blood, body fluids or tissue other than pulmonary, hilar or stool<br>3. no concurrent non-pulmonary TB |

|                                                                 | <b>CONFIRMED</b>                                                                                                                                                            | <b>PROBABLE</b>                                                                                                                                                                                                               | <b>POSSIBLE</b>                                                                                                                                                                                                                                                                                                      |
|-----------------------------------------------------------------|-----------------------------------------------------------------------------------------------------------------------------------------------------------------------------|-------------------------------------------------------------------------------------------------------------------------------------------------------------------------------------------------------------------------------|----------------------------------------------------------------------------------------------------------------------------------------------------------------------------------------------------------------------------------------------------------------------------------------------------------------------|
| <i>M. tuberculosis</i> disease, pulmonary                       | <b>Confirmed 1+2:</b><br>1. Compatible symptoms of fever, dyspnea, cough, weight loss or fatigue<br>2. culture or PCR from <b>sputum</b> or bronchial lavage or lung tissue | <b>Probable 1+2+3+4:</b><br>1. Symptoms of fever, dyspnea, cough, weight loss or fatigue<br>2. abnormal chest X-ray,<br>3. AFBs seen in sputum or lavage or lung tissue but not grown in culture,<br>4. responds to treatment | <b>Possible 1+2+3+4:</b><br>1. Symptoms of fever, dyspnea, cough, weight loss or fatigue<br>2. abnormal chest X-ray compatible with pulmonary TB (such as upper lobe cavitation, pleural exudate)<br>3. No other etiology for pulmonary symptoms and signs identified,<br>4. Responds to anti tuberculosis treatment |
| <i>M. tuberculosis</i> disease, Extrapulmonary (not meningitis) | <b>Confirmed 1+2:</b><br>1. Compatible symptoms<br>2. culture or PCR or MTB Xpert from blood or affected tissue (i.e. pericardial, ascites, and lymph glands)               | <b>Probable 1+2+3:</b><br>1. Compatible symptoms<br>2. AFBs seen from affected tissue or blood<br>3. concurrent diagnosis of pulmonary TB or responds to treatment                                                            | <b>Possible 1+2+3:</b><br>1. Compatible symptoms<br>2. No other etiology for symptoms and signs identified<br>3. concurrent diagnosis of pulmonary TB or responds to treatment                                                                                                                                       |
| <i>M. tuberculosis</i> disease, meningitis                      | <b>Confirmed 1+2:</b><br>1. Clinical symptoms of meningism ( <b>Appendix 7</b> )<br>2. Tissue/CSF culture, or PCR, or AFB or MTB Xpert                                      | <b>Probable 1+ a score ≥12 ( Appendix: Table 2):</b><br>1. Clinical symptoms of meningism ( <b>Appendix 7</b> )<br>2. A score ≥12, based on clinical, CSF, cerebral brain imaging criteria or evidence of TB elsewhere        |                                                                                                                                                                                                                                                                                                                      |
| Nocardiosis                                                     | <b>Confirmed 1+2:</b><br>1. Clinical evidence of invasive Infection ( <b>Appendix 8</b> )<br>2. a positive culture from the affected tissue or blood                        | <b>Probable 1+2:</b><br>1. Clinical evidence of invasive Infection ( <b>Appendix 8</b> )<br>2. microscopic evidence of bronchial weakly acid fast organisms from the affected tissue                                          |                                                                                                                                                                                                                                                                                                                      |



## RHICCA – Clinical endpoint diagnostic criteria vs 3.5 Apr 2018

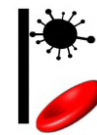

# RHICCA

Reactivation of herpesviruses and inflammation as cardiovascular  
and cerebrovascular risk factors in ART initiators

|                                                |                                                                                                                                                                                                                                            |                                                                                                                                                                                                                                                                                                                                                                                                                                                                                            |
|------------------------------------------------|--------------------------------------------------------------------------------------------------------------------------------------------------------------------------------------------------------------------------------------------|--------------------------------------------------------------------------------------------------------------------------------------------------------------------------------------------------------------------------------------------------------------------------------------------------------------------------------------------------------------------------------------------------------------------------------------------------------------------------------------------|
| <i>Pneumocystis jirovecii</i> pulmonary        | <b>Confirmed 1+2:</b> <ol style="list-style-type: none"> <li>1. compatible clinical syndrome<br/><b>(Appendix 9)</b></li> <li>2. microscopic or histological demonstration of <i>P. jirovecii</i> cysts in a pulmonary specimen</li> </ol> | Probable 1+2+3+4+5 <ol style="list-style-type: none"> <li>1. dyspnea or cough, or fever progressive over &gt; 1 week</li> <li>2. <b>diffuse chest x-ray abnormality</b> or, if on inhalational pentamidine, diffuse upper lung field abnormality</li> <li>3. evidence of hypoxia</li> <li>4. not suggestive of bacterial pneumonia (i.e., not purulent sputum or hemoptysis, no bacterial pathogen identified in blood or bronchial wash)</li> <li>5. response to PcJ treatment</li> </ol> |
| <i>Pneumocystis jirovecii</i> , extrapulmonary | <b>Confirmed 1+2:</b> <ol style="list-style-type: none"> <li>1. compatible clinical syndrome</li> <li>2. microscopic or histological demonstration of <i>P. jirovecii</i> cysts in a tissue other than pulmonary specimen</li> </ol>       | None                                                                                                                                                                                                                                                                                                                                                                                                                                                                                       |

# RHICCA – Clinical endpoint diagnostic criteria vs 3.5 Apr 2018

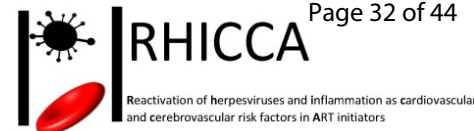

|                                                                                                                                                                                                                                                                                                  | CONFIRMED                                                                                                                                                                                                                                                                                                                                                                                                                                                                                                                                                                                                                                                                                                                                                                                                                                                                                                                 | PROBABLE                                                                                                                                                                                                                                                                                                                                                                                                                                                                                                                                                                                                                                                                              |
|--------------------------------------------------------------------------------------------------------------------------------------------------------------------------------------------------------------------------------------------------------------------------------------------------|---------------------------------------------------------------------------------------------------------------------------------------------------------------------------------------------------------------------------------------------------------------------------------------------------------------------------------------------------------------------------------------------------------------------------------------------------------------------------------------------------------------------------------------------------------------------------------------------------------------------------------------------------------------------------------------------------------------------------------------------------------------------------------------------------------------------------------------------------------------------------------------------------------------------------|---------------------------------------------------------------------------------------------------------------------------------------------------------------------------------------------------------------------------------------------------------------------------------------------------------------------------------------------------------------------------------------------------------------------------------------------------------------------------------------------------------------------------------------------------------------------------------------------------------------------------------------------------------------------------------------|
| <b>INFECTIONS (CONTINUED)</b>                                                                                                                                                                                                                                                                    |                                                                                                                                                                                                                                                                                                                                                                                                                                                                                                                                                                                                                                                                                                                                                                                                                                                                                                                           |                                                                                                                                                                                                                                                                                                                                                                                                                                                                                                                                                                                                                                                                                       |
| Pneumonia, <b>SINGLE EPISODE (isolated)</b><br>bacterial, excludes: (a) post-obstructive pneumonias, including in those with intrapulmonary/bronchial lesions, (b) aspiration pneumonia, including in those with decreased consciousness levels, (c) nosocomial ventilator-associated pneumonias | <b>Confirmed 1+2+3:</b><br>pneumonia episodes must occur after enrollment;<br>1. Signs and symptoms suggestive of bacterial pneumonia ( <b>appendix 10</b> )<br>2. Focal CXR abnormality compatible with bacterial pneumonia,<br>3. identification of a bacterial pathogen by positive blood culture, positive bronchoscopic sputum culture, detection of Legionella or pneumococcal antigen in urine or blood or diagnostic serologic findings                                                                                                                                                                                                                                                                                                                                                                                                                                                                           | <b>Probable 1+2:</b><br>pneumonia episodes must occur after enrollment;<br>1. Signs and symptoms suggestive of bacterial pneumonia ( <b>Appendix 10</b> )<br>2. Focal CXR abnormality compatible with Bacterial pneumonia                                                                                                                                                                                                                                                                                                                                                                                                                                                             |
| Pneumonia, <b>recurrent</b><br>bacterial, excludes: (a) post-obstructive pneumonias, including in those with intrapulmonary/bronchial lesions, (b) aspiration pneumonia, including in those with decreased consciousness levels, (c) nosocomial ventilator-associated pneumonias                 | <b>Confirmed 1+2+3+4+5</b><br>Second pneumonia episodes must occur after enrollment and after an isolated pneumonia, within 365 days of the first episode and with strong clinical evidence that the first episode was cured;<br>1. Signs and symptoms of second event suggestive of bacterial pneumonia ( <b>Appendix 10</b> )<br>2. Focal CXR abnormality compatible with bacterial pneumonia,<br>3. identification of a bacterial pathogen by positive blood culture, positive bronchoscopic sputum culture, detection of Legionella or pneumococcal antigen in urine or blood or diagnostic serologic findings<br>4. the second pneumonia had onset of symptoms < 365 days after the first episode<br>5. there is strong evidence that the first episode was cured such as an intervening clear CXR or absence of symptoms after > 1 month off antibacterial effective against pathogens commonly producing pneumonia | <b>Probable 1+2+3+4:</b><br>Second pneumonia episodes must occur after enrollment and after an isolated pneumonia, within 365 days of the first episode and with strong clinical evidence that the first episode was cured;<br>1. Signs and symptoms suggestive of bacterial pneumonia ( <b>Appendix 10</b> )<br>2. focal CXR abnormality compatible with bacterial pneumonia<br>3. the second pneumonia had onset of symptoms < 365 days after the first episode<br>4. there is strong evidence that the first episode was cured such as an intervening clear CXR or absence of symptoms after > 1 month off antibacterials effective against pathogens commonly producing pneumonia |
| PML (progressive multifocal leukoencephalopathy)                                                                                                                                                                                                                                                 | <b>Confirmed 1 or 2:</b><br>1. positive histology,<br>2. compatible clinical ( <b>Appendix 11</b> ) and radiologic course and positive CSF PCR for JK virus                                                                                                                                                                                                                                                                                                                                                                                                                                                                                                                                                                                                                                                                                                                                                               | <b>Probable 1+2+3:</b><br>1. Consistent symptoms ( <b>Appendix 11</b> ),<br>2. brain image consistent with PML,<br>3. no response to toxo treatment or toxoplasma                                                                                                                                                                                                                                                                                                                                                                                                                                                                                                                     |
| Salmonella blood stream infection or bacteraemia, isolated                                                                                                                                                                                                                                       | <b>Confirmed 1:</b><br>A septic episode must occur after enrollment;<br>1. Positive blood or tissue culture                                                                                                                                                                                                                                                                                                                                                                                                                                                                                                                                                                                                                                                                                                                                                                                                               | None                                                                                                                                                                                                                                                                                                                                                                                                                                                                                                                                                                                                                                                                                  |
| Salmonella blood stream infection or bacteraemia, recurrent                                                                                                                                                                                                                                      | <b>Confirmed 1:</b><br>A second septic episode must occur after enrollment and after an isolated episode;<br><br>1. Has met the criteria of isolated Salmonella septicemia<br>2. Positive blood or tissue culture on the second episode<br>3. the second septicemia had onset of symptoms < 365 days after the first episode<br>4. the second septicemia must be due to a different Salmonella serotype or there must be strong evidence that the first episode was cured such as a negative blood culture off effective antibacterials for > 1 week or absence of symptoms off antibacterials for > 1 month                                                                                                                                                                                                                                                                                                              | None                                                                                                                                                                                                                                                                                                                                                                                                                                                                                                                                                                                                                                                                                  |

## RHICCA – Clinical endpoint diagnostic criteria vs 3.5 Apr 2018



|                        |                                                                                                                                                                                                                                                                                 |                                                                                                                                                                                                                                                                                                                         |
|------------------------|---------------------------------------------------------------------------------------------------------------------------------------------------------------------------------------------------------------------------------------------------------------------------------|-------------------------------------------------------------------------------------------------------------------------------------------------------------------------------------------------------------------------------------------------------------------------------------------------------------------------|
| Toxoplasmosis of brain | <b>Confirmed 1+2+3:</b> <ol style="list-style-type: none"> <li>1. Compatible clinical findings (<b>Appendix 12</b>)</li> <li>2. Compatible radiological findings</li> <li>3. Detection of T gondii in the <b>CSF</b> or <b>brain tissue</b> (i.e. microscopy or PCR)</li> </ol> | <b>Probable 1+2+3:</b> <ol style="list-style-type: none"> <li>1. Symptoms of focal intracranial abnormality or decreased consciousness</li> <li>2. brain image consistent with lesion(s) enhanced by contrast</li> <li>3. <b>positive toxoplasma serology</b> or responds to treatment clinically or by scan</li> </ol> |
|------------------------|---------------------------------------------------------------------------------------------------------------------------------------------------------------------------------------------------------------------------------------------------------------------------------|-------------------------------------------------------------------------------------------------------------------------------------------------------------------------------------------------------------------------------------------------------------------------------------------------------------------------|

|                                                              | CONFIRMED                                                                                                  | PROBABLE                                                                                                                                                                                                                                                                                                                                                                                                                                                                                                                                       |
|--------------------------------------------------------------|------------------------------------------------------------------------------------------------------------|------------------------------------------------------------------------------------------------------------------------------------------------------------------------------------------------------------------------------------------------------------------------------------------------------------------------------------------------------------------------------------------------------------------------------------------------------------------------------------------------------------------------------------------------|
| <b>NEOPLASMS</b>                                             |                                                                                                            |                                                                                                                                                                                                                                                                                                                                                                                                                                                                                                                                                |
| Cervical carcinoma, invasive                                 | <b>Confirmed 1:</b> <ol style="list-style-type: none"> <li>1. Histology (NOT carcinoma-in-situ)</li> </ol> | <b>None</b>                                                                                                                                                                                                                                                                                                                                                                                                                                                                                                                                    |
| Kaposi sarcoma, (mucocutaneous or visceral)                  | <b>Confirmed 1:</b> <ol style="list-style-type: none"> <li>1. Histology</li> </ol>                         | <ol style="list-style-type: none"> <li>1. Highly typical appearance</li> <li>2. persistence for &gt; 1 month</li> </ol>                                                                                                                                                                                                                                                                                                                                                                                                                        |
| Lymphoma, primary, of brain                                  | <b>Confirmed 1:</b> <ol style="list-style-type: none"> <li>1. Histology of brain tissue</li> </ol>         | <b>Probable 1+2+3:</b> <ol style="list-style-type: none"> <li>1. Symptoms consistent with lymphoma</li> <li>2. at least one CNS lesion with mass effect</li> <li>3. lack of clinical or radiographic response at least 2 weeks of treatment for toxoplasmosis</li> </ol>                                                                                                                                                                                                                                                                       |
| Lymphoma, Hodgkin's                                          | <ol style="list-style-type: none"> <li>1. Histology</li> </ol>                                             | None                                                                                                                                                                                                                                                                                                                                                                                                                                                                                                                                           |
| Lymphoma, non-Hodgkin's, all cell types                      | <b>Confirmed 1:</b> <ol style="list-style-type: none"> <li>1. Histology</li> </ol>                         | None                                                                                                                                                                                                                                                                                                                                                                                                                                                                                                                                           |
| <b>NEUROLOGICAL</b>                                          |                                                                                                            |                                                                                                                                                                                                                                                                                                                                                                                                                                                                                                                                                |
| HIV-related encephalopathy (including AIDS Dementia Complex) | None                                                                                                       | <b>Probable 1+2+3+4:</b> <ol style="list-style-type: none"> <li>1. Cognitive or motor dysfunction interfering with usual activity, progressive over weeks or months</li> <li>2. no other condition to explain the findings</li> <li>3. brain image obtained and suggests no other causes</li> <li>4. grade 2 or worse impairment in at least 2 domains by NARS (<b>appendix – table 1</b>) excluding abnormal domains at trial entry. (For persons with abnormal domains at entry worsening by at least two grades meets criteria.)</li> </ol> |

# RHICCA – Clinical endpoint diagnostic criteria vs 3.5 Apr 2018

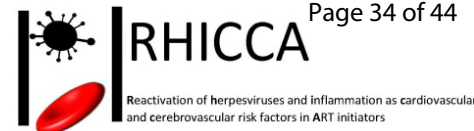

| CARDIOVASCULAR DISEASES            |                                                                                                                                                                                                                                                                                                                                                                                                                                                                                                                                                                                                                                                                                                                                                                                                                                                                                                                                                                                                                                                                                                                                                                                                                                                         |                                                                                                                                                                                                                                                                                                                                                                                                                             |
|------------------------------------|---------------------------------------------------------------------------------------------------------------------------------------------------------------------------------------------------------------------------------------------------------------------------------------------------------------------------------------------------------------------------------------------------------------------------------------------------------------------------------------------------------------------------------------------------------------------------------------------------------------------------------------------------------------------------------------------------------------------------------------------------------------------------------------------------------------------------------------------------------------------------------------------------------------------------------------------------------------------------------------------------------------------------------------------------------------------------------------------------------------------------------------------------------------------------------------------------------------------------------------------------------|-----------------------------------------------------------------------------------------------------------------------------------------------------------------------------------------------------------------------------------------------------------------------------------------------------------------------------------------------------------------------------------------------------------------------------|
| <p>Acute Myocardial Infarction</p> | <p><b>Confirmed: One of the following 5 criteria (adapted from 2007 Universal Definition of Myocardial Infarction): [1 + (2 or 3 or 6)] or 4 or 5</b></p> <ol style="list-style-type: none"> <li>1. Rise and/or fall of cardiac biomarkers (preferably troponin), with at least one value above 99th percentile of upper reference limit (URL);</li> <li>2. Occurrence of a compatible clinical syndrome, including symptoms (such as chest pain – <b>see Appendix 1</b>) consistent with myocardial ischemia;</li> <li>3. ECG changes indicative of new ischemia (new ST-changes or new left bundle branch block [LBBB]), or development of pathological Q waves on the ECG;</li> <li>4. Sudden unexpected cardiac death involving cardiac arrest before biomarkers are obtained or before a time when biomarkers appear, along with (a) new ST-changes or new LBB, or (b) evidence of fresh thrombus on coronary angiography or at autopsy</li> <li>5. Pathologic findings of acute myocardial infarction (including acute MI demonstrated as the cause of death on autopsy)</li> <li>6. Development of a) evolving new Q waves, or b) evolving ST elevation, preferably based on at least 2 ECGs taken during the same hospital admission</li> </ol> | <p><b>Probable 1 and 2:</b></p> <ol style="list-style-type: none"> <li>1. Occurrence of a compatible clinical syndrome (<b>Appendix 1</b>), including symptoms (such as chest pain) consistent with myocardial ischemia)</li> <li>2. Development of a) evolving new Q waves, or b) evolving ST elevation, preferably based on at least; ECGs taken during the same hospital admission.</li> </ol>                           |
| <p>Peripheral vascular disease</p> | <p><b>Confirmed (1+2) or (1+3):</b></p> <ol style="list-style-type: none"> <li>1. Compatible clinical signs and symptoms (<b>see Appendix 3</b>)</li> <li>2. Positive results on diagnostic imaging studies (e.g., Doppler ultrasound, contrast arteriography, MRI arteriography); 3. Ankle Brachial Pressure Index &lt; 0.90 in non-diabetics</li> </ol>                                                                                                                                                                                                                                                                                                                                                                                                                                                                                                                                                                                                                                                                                                                                                                                                                                                                                               | <p><b>Probable 1:</b></p> <ol style="list-style-type: none"> <li>1. Compatible clinical signs and symptoms (<b>see Appendix 3</b>)</li> </ol>                                                                                                                                                                                                                                                                               |
| <p>Stroke</p>                      | <p><b>Confirmed (1+2) or 3 or 4 or 5:</b></p> <ol style="list-style-type: none"> <li>1. Acute onset with a clinically compatible course, including unequivocal objective findings of a localizing neurologic deficit (<b>appendix 4</b>);</li> <li>2. CT or MRI compatible with diagnosis of stroke and current neurologic signs and symptoms</li> <li>3. Stroke diagnosed as cause of death at autopsy</li> <li>4. Compatible clinical history and positive lumbar puncture compatible with subarachnoid hemorrhage</li> <li>5. Death certificate or death note from medical record listing stroke as cause of death</li> </ol>                                                                                                                                                                                                                                                                                                                                                                                                                                                                                                                                                                                                                        | <p><b>Probable (1+2) or (1+3):</b></p> <ol style="list-style-type: none"> <li>1. Acute onset with a clinically compatible course, including unequivocal objective findings of a localizing neurologic deficit (<b>appendix 4</b>);</li> <li>2. Positive lumbar puncture compatible with subarachnoid hemorrhage</li> <li>3. Death certificate or death note from medical record listing stroke as cause of death</li> </ol> |
| <p>Congestive heart failure</p>    | <p><b>Confirmed (1+2) or (1+3) or (1+4):</b></p> <ol style="list-style-type: none"> <li>1. Clinical signs and symptoms compatible with left or right sided heart failure [<b>Appendix 5</b>] without an alternative explanation</li> <li>2. Hemodynamic measurements, radionuclide ventriculography, echocardiogram, cardiac catheterization, or multiple gated acquisition scan showing a decreased ejection fraction of &lt; 45%</li> <li>3. Echocardiogram, cardiac catheterization or other studies showing evidence of increased left atrial pressure or right heart failure;</li> <li>4. Elevated levels of Brain Natriuretic Peptide (BNP) or NT-proBNP</li> </ol>                                                                                                                                                                                                                                                                                                                                                                                                                                                                                                                                                                               | <p><b>Probable 1+2+3:</b></p> <ol style="list-style-type: none"> <li>1. Clinical signs and symptoms compatible with left or right sided heart failure [<b>Appendix 5</b>] without an alternative explanation</li> <li>2. Chest x-ray or other imaging study showing evidence of congestive heart failure, including cardiac enlargement;</li> <li>3. Documentation of treatment for congestive heart failure</li> </ol>     |

## RHICCA – Clinical endpoint diagnostic criteria vs 3.5 Apr 2018

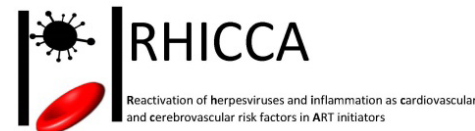

|                                                                         |                                                                                                                                                                                                                                                                                                                                                                                                                                                                                                                                                                                                                                                                                                                              |                                                                                                                                                                                                                                                                                                                                                                                                                                                                                                                        |
|-------------------------------------------------------------------------|------------------------------------------------------------------------------------------------------------------------------------------------------------------------------------------------------------------------------------------------------------------------------------------------------------------------------------------------------------------------------------------------------------------------------------------------------------------------------------------------------------------------------------------------------------------------------------------------------------------------------------------------------------------------------------------------------------------------------|------------------------------------------------------------------------------------------------------------------------------------------------------------------------------------------------------------------------------------------------------------------------------------------------------------------------------------------------------------------------------------------------------------------------------------------------------------------------------------------------------------------------|
| Coronary artery disease requiring drug treatment                        | <b>Confirmed (1 or 2) + 3:</b><br>1. Evidence of myocardial ischemia based on either diagnostic imaging (such as a <b>stress echocardiogram</b> or <b>thallium scan</b> ) or diagnostic changes on an electrocardiogram (such as during stress testing or an episode of chest pain)<br>2. Evidence of coronary artery disease based on <b>coronary angiography</b> or other diagnostic imaging<br>3. Use of medication given to treat or prevent angina (e.g., nitrates, beta blockers, calcium channel blockers)                                                                                                                                                                                                            | <b>Probable 1+2:</b><br>1. Other evidence of myocardial ischemia and/or coronary artery disease (including that based primarily upon symptoms and clinical presentation, such as chest pain with exertion)<br>2. Use of medication given to treat or prevent angina (e.g., nitrates, beta blockers, calcium channel blockers)                                                                                                                                                                                          |
| Deep vein thrombosis                                                    | <b>Confirmed 1:</b><br>1. Diagnosis of deep vein thrombosis (DVT) by contrast venography, or <b>ultrasonography</b> other comparable imaging techniques;                                                                                                                                                                                                                                                                                                                                                                                                                                                                                                                                                                     | <b>Probable (1)+2+3:</b><br>1. <b>An elevated D-dimer test;</b><br>2. A score on the Wells Clinical Prediction Rule for DVT of $\geq 3$ points;<br>3. Absence of alternative diagnosis as likely or greater than that of deep venous thrombosis.<br><b>Wells Clinical Prediction Rule for DVT (Appendix 6)</b>                                                                                                                                                                                                         |
| <b>SYSTEMIC DISEASES</b>                                                |                                                                                                                                                                                                                                                                                                                                                                                                                                                                                                                                                                                                                                                                                                                              |                                                                                                                                                                                                                                                                                                                                                                                                                                                                                                                        |
| Anaemia<br>NOT FOR ERC<br>TO BE DETERMINED<br>RETROSPECTIVELY           | <b>Confirmed 1</b><br>Classified according to both WHO and DAIDS thresholds for severe/grade 3-4 anaemia                                                                                                                                                                                                                                                                                                                                                                                                                                                                                                                                                                                                                     |                                                                                                                                                                                                                                                                                                                                                                                                                                                                                                                        |
| Chronic Kidney disease                                                  | <b>Confirmed: 1 or 2</b><br>1. Kidney damage for >3 months, as defined by structural or functional abnormalities of the kidney with or without decreased GRF, manifest by either; <ul style="list-style-type: none"> <li>- Pathological abnormalities; or</li> <li>- Markers of kidney damage, including abnormalities in the composition of the blood or urine or abnormalities in imaging results</li> </ul> 2. GFR <60mL/min/1.73m <sup>2</sup> for >3months, with or without kidney disease (estimated by <b>CKD-EPI</b> )                                                                                                                                                                                               | <b>Confirmed: 1 or 2</b><br>1. Isolated Kidney damage, as defined by structural or functional abnormalities of the kidney with or without decreased GRF, manifest by either; <ul style="list-style-type: none"> <li>- Pathological abnormalities; or</li> <li>- Markers of kidney damage, including abnormalities in the composition of the blood or urine or abnormalities in imaging results</li> </ul> 2. Isolated GFR <60mL/min/1.73m <sup>2</sup> , with or without kidney disease (estimated by <b>CKD-EPI</b> ) |
| End-stage renal disease                                                 | <b>Confirmed: 1</b><br>1. Hemodialysis or peritoneal dialysis documented in a clinical note for a period of at least three months;                                                                                                                                                                                                                                                                                                                                                                                                                                                                                                                                                                                           | <b>Probable: 1</b><br>1. Hemodialysis or peritoneal dialysis documented in a clinical note for a period of at least one month and up to the time of death in a patient who dies within three months after dialysis begins                                                                                                                                                                                                                                                                                              |
| Diabetes Mellitus<br>NOT FOR ERC<br>TO BE DETERMINED<br>RETROSPECTIVELY | <b>Confirmed: 1 or 2 or 3 or 4</b><br>1. Symptoms of diabetes plus casual plasma glucose concentration $\geq 200$ mg/dL (11.1 mmol/L). (Casual is defined as any time of day without regard to time since last meal. The classic symptoms of diabetes include polyuria and polydipsia.)<br>2. Fasting plasma glucose $\geq 126$ mg/dL (7.0 mmol/L). (Fasting is defined as no caloric intake for at least 8 hours.)<br>3. 2-hour post-load glucose $\geq 200$ mg/dL (11.1 mmol/L) during an oral glucose tolerance test. (The test should be performed as described by WHO, using glucose load containing the equivalent of 75 g anhydrous glucose dissolved in water.)<br>4. An <b>HbA1c</b> of 48mmol/mol (6.5%) or above. | <b>None</b>                                                                                                                                                                                                                                                                                                                                                                                                                                                                                                            |

# RHICCA – Clinical endpoint diagnostic criteria vs 3.5 Apr 2018

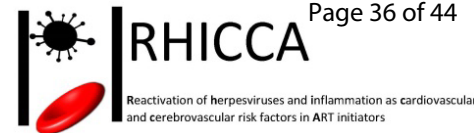

|                                                                          |                                                                                                                                                                                                                                                                                                                                                                                                                                                                                                                                                                                                                                                                                                                                                                                                                                                                                                                                                   |                                                                                                                                                                                                                                                                                                                                                                                                                                                                    |
|--------------------------------------------------------------------------|---------------------------------------------------------------------------------------------------------------------------------------------------------------------------------------------------------------------------------------------------------------------------------------------------------------------------------------------------------------------------------------------------------------------------------------------------------------------------------------------------------------------------------------------------------------------------------------------------------------------------------------------------------------------------------------------------------------------------------------------------------------------------------------------------------------------------------------------------------------------------------------------------------------------------------------------------|--------------------------------------------------------------------------------------------------------------------------------------------------------------------------------------------------------------------------------------------------------------------------------------------------------------------------------------------------------------------------------------------------------------------------------------------------------------------|
| Decompensate Liver disease                                               | <p><b>Confirmed: 1+2</b></p> <p>1. Histologic, radiographic, or ultrasound evidence of cirrhosis, as documented by one of the following:</p> <ul style="list-style-type: none"> <li>a. Histologic evidence of cirrhosis obtained by liver biopsy or autopsy</li> <li>b. MRI or CT consistent with cirrhosis</li> <li>c. A positive result on ultrasound imaging consistent with cirrhosis</li> </ul> <p>2. Clinical evidence of decompensation, as documented by one of the following, and without an alternative explanation:</p> <ul style="list-style-type: none"> <li>a. Ascites</li> <li>b. Hepatic encephalopathy</li> <li>c. Bleeding from gastric or esophageal varices</li> <li>d. Spontaneous bacterial peritonitis</li> </ul>                                                                                                                                                                                                          | <p><b>Probable: 1</b></p> <p>1. Clinical evidence of decompensation, as documented by one of the following, and without an alternative explanation:</p> <ul style="list-style-type: none"> <li>a. Ascites</li> <li>b. Hepatic encephalopathy</li> <li>c. Bleeding from gastric or esophageal varices</li> <li>d. Spontaneous bacterial peritonitis</li> </ul>                                                                                                      |
| Hypertension                                                             | <p><b>Confirmed: 1 or 2</b></p> <p>1. An average of three blood pressure (BP) readings of systolic of 140 mm Hg or above and/or diastolic of 90 mm Hg or above on the same day and persist 5-7 days after the initial reading.</p> <p>2. An isolated reading of 140mg systolic or 90mg diastolic and presence of the following end-organ disease:</p> <ul style="list-style-type: none"> <li>a. Cardiac (i.e. left ventricular hypertrophy meeting the ECG criteria [<b>Appendix 2</b>] on evidence on cardiac echocardiogram)</li> <li>b. Renal (i.e. microalbuminuria [urinary albumin excretion of 30-300mg/dl], elevated creatinine, reduced estimated GFR (60-90ml/min)</li> <li>c. Retinal(i.e. hypertensive retinal changes)</li> <li>d. Vascular disease (i.e. stroke [persisting on day 7], peripheral vascular disease, myocardial infarction, coronary artery disease requiring drug treatment, congestive cardiac failure)</li> </ul> | <p><b>Probable: 1</b></p> <p>1. An average of three BP readings of systolic of 140 mm Hg or above and/or diastolic of 90 mm Hg or above on the same day.</p>                                                                                                                                                                                                                                                                                                       |
| Hyperlipidemia<br><br>NOT FOR ERC<br>TO BE DETERMINED<br>RETROSPECTIVELY | <p><b>Confirmed: 1 or 2</b></p> <ul style="list-style-type: none"> <li>1. Fasting total cholesterol &gt;200mg/dl (&gt;5.2 mmol/L) or LDL cholesterol &gt;130mg/dl (&gt;3.4mmol/l) or Triglycerides &gt;150 mg/dl (1.7 mmol/L)</li> <li>2. Non-fasting total cholesterol &gt;240mg/dl (&gt;6.2 mmol/L) or LDL cholesterol &gt;160mg/dl (&gt;4.1 mmol/L) or Triglycerides &gt;200 mg/dl (2.3mmol/L)</li> </ul>                                                                                                                                                                                                                                                                                                                                                                                                                                                                                                                                      | <p><b>None</b></p>                                                                                                                                                                                                                                                                                                                                                                                                                                                 |
| HIV wasting syndrome                                                     | <p>None</p>                                                                                                                                                                                                                                                                                                                                                                                                                                                                                                                                                                                                                                                                                                                                                                                                                                                                                                                                       | <p><b>Probable: 1 + 2 + 3</b></p> <ul style="list-style-type: none"> <li>1. unexplained, involuntary weight loss &gt;10% from baseline,</li> <li>2. persistent diarrhea with &gt; 2 liquid stools/d for &gt; 1 month or weakness for &gt; 1 month or fever for &gt; 1 month,</li> <li>3. tests for alternate causes of weight loss, such as cancer, TB, MAC, cryptosporidiosis or other specific causes of weight loss, if obtained, should be negative</li> </ul> |



# RHICCA – Clinical endpoint diagnostic criteria vs 3.5 Apr 2018



## Appendix

1. Clinical syndrome of Myocardial infarction (a+ b +d) or (c+d)
  - a. Chest pain (with associated clamminess, pallor)
  - b. Radiation to the upper extremity and jaw
  - c. Epigastric discomfort with exertion or at rest
  - d. Severe discomfort lasting for more than 20 minutes
2. ECG criteria for LVH

Any two of the following 3 criteria's should be met:

|                                                                                                                                                                                                                                                                                                                                                                                                                                                                                                                                                                                                                                                                                                                                                                                                                                                                                                                               |                                                                              |
|-------------------------------------------------------------------------------------------------------------------------------------------------------------------------------------------------------------------------------------------------------------------------------------------------------------------------------------------------------------------------------------------------------------------------------------------------------------------------------------------------------------------------------------------------------------------------------------------------------------------------------------------------------------------------------------------------------------------------------------------------------------------------------------------------------------------------------------------------------------------------------------------------------------------------------|------------------------------------------------------------------------------|
| <p>Sokolow Lyon Criteria</p> <ul style="list-style-type: none"> <li>• S in V<sub>1</sub> or V<sub>2</sub> + R in V<sub>5</sub> or V<sub>6</sub> (whichever is larger) ≥ 35 mm (≥ 7 large squares)</li> <li>• R in aVL ≥ 11 mm</li> </ul> <p><b>Meets all of Sokolow Lyon criteria to be diagnostic</b></p>                                                                                                                                                                                                                                                                                                                                                                                                                                                                                                                                                                                                                    |                                                                              |
| <p>Cornell voltage criteria</p> <p>ECG diagnosis of LVH involve measurement of the sum of the R wave in lead aVL and the S wave in lead V<sub>3</sub>. The Cornell criteria for LVH are:</p> <ul style="list-style-type: none"> <li>• S in V<sub>3</sub> + R in aVL &gt; 28 mm (men)</li> <li>• S in V<sub>3</sub> + R in aVL &gt; 20 mm (women)</li> </ul> <p><b>Meets all of Cornell voltage criteria to be diagnostic</b></p>                                                                                                                                                                                                                                                                                                                                                                                                                                                                                              |                                                                              |
| <p>Romhilt-Estes point score system ECG Criteria</p> <p>Voltage Criteria (any of):</p> <ol style="list-style-type: none"> <li>1. R or S in limb leads ≥20 mm</li> <li>2. S in V<sub>1</sub> or V<sub>2</sub> ≥30 mm</li> <li>3. R in V<sub>5</sub> or V<sub>6</sub> ≥30 mm</li> </ol> <p>-----</p> <p>ST-T Abnormalities:</p> <ol style="list-style-type: none"> <li>1. ST-T vector opposite to QRS without digitalis</li> <li>2. ST-T vector opposite to QRS with digitalis</li> <li>3. Negative terminal P mode in V<sub>1</sub> 1 mm in depth and 0.04 sec in duration (indicates <a href="#">left atrial enlargement</a>)</li> <li>4. Left axis deviation (QRS of -30° or more)</li> <li>5. QRS duration ≥0.09 sec</li> <li>6. Delayed R wave peak time (<a href="#">intrinsicoid deflection</a>) in V<sub>5</sub> or V<sub>6</sub> (&gt;0.05 sec)</li> </ol> <p><b>Romhilt-Estes point score &gt;4 is diagnostic</b></p> | <p>Points</p> <p>3</p> <p>3</p> <p>1</p> <p>3</p> <p>2</p> <p>1</p> <p>1</p> |

3. Clinical syndrome of Peripheral vascular disease (a+ (b or c or d)
  - a. Painful cramping in the hip, thigh or calf muscles after certain activities, such as walking or climbing stairs (claudication)
  - b. femoral bruit
  - c. decreased peripheral pulses
  - d. change in color or temperature of limb suggesting peripheral arterial disease

## RHICCA – Clinical endpoint diagnostic criteria vs 3.5 Apr 2018

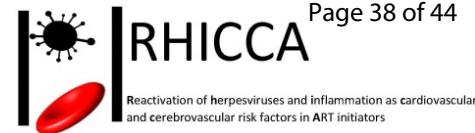

### 4. Clinical syndrome of stroke; should meet the 3 criteria's;

|                                                                                                                                     |                                                                                                                                                                                                                                                                                                                                                                                                                                                                                                                                                                                                                                                                                                                                                                              |
|-------------------------------------------------------------------------------------------------------------------------------------|------------------------------------------------------------------------------------------------------------------------------------------------------------------------------------------------------------------------------------------------------------------------------------------------------------------------------------------------------------------------------------------------------------------------------------------------------------------------------------------------------------------------------------------------------------------------------------------------------------------------------------------------------------------------------------------------------------------------------------------------------------------------------|
| 1. <b>Sudden onset</b>                                                                                                              |                                                                                                                                                                                                                                                                                                                                                                                                                                                                                                                                                                                                                                                                                                                                                                              |
| 2. <b>Focal deficit</b> (or global disturbance but not seizures)                                                                    | <p><b>Large artery disease (anterior circulation syndrome)</b><br/>Hemi-paresis + Hemi-sensory loss + higher cortical dysfunction (gaze paresis, language impairment [expression + comprehension], visual field defect, hemi-neglect)</p> <p><b>Large artery disease (posterior circulation syndrome)</b><br/>Vertigo, visual field defect, gaze paresis, double vision, swallowing difficulty, crossed signs [contralateral limb weakness and ipsilateral cranial nerves abnormality], ataxic limb and gait, drowsy/loss of consciousness</p> <p><b>Small vessel disease (lacunar syndrome)</b><br/>Pure hemi-sensory loss<br/>Pure hemiparesis<br/>Pure sensorimotor<br/>Pure ataxic hemiparesis (including dysarthria-clumsy hand syndrome)<br/>Thunderclap headache*</p> |
| 3. <b>Lasting &gt; 24 hours</b> (<24 hours is a TIA)                                                                                |                                                                                                                                                                                                                                                                                                                                                                                                                                                                                                                                                                                                                                                                                                                                                                              |
| *seen in those with a suspicion of subarachnoid or venous stroke. In this case criteria 1 and 3 does not necessarily have to be met |                                                                                                                                                                                                                                                                                                                                                                                                                                                                                                                                                                                                                                                                                                                                                                              |

### 5. Clinical syndrome of congestive heart failure:

Using the Framingham criteria relies on clinical signs and symptoms; 1 or more major and two or more minor criteria are clinically suggestive of heart failure:

#### *Major criteria*

- A. Acute pulmonary edema
- B. Cardiomegaly
- C. Hepatojugular reflex
- D. Neck vein distention
- E. Paroxysmal nocturnal **Dyspnea** or **Orthopnea**
- F. Pulmonary crackles
- G. **Third Heart Sound (S3 Gallup Rhythm)**

#### *Minor Criteria*

- A. **Ankle edema**
- B. **Dyspnea** on exertion
- C. **Hepatomegaly**
- D. Nocturnal cough
- E. **Pleural Effusion**
- F. **Tachycardia (Heart Rate >120 beats per minute)**



## RHICCA – Clinical endpoint diagnostic criteria vs 3.5 Apr 2018

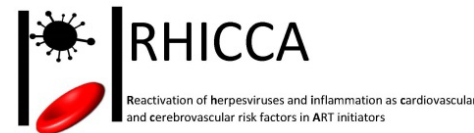

### 6. Wells Clinical Prediction Rule for DVT (Adapted from: Wells PS et al. Lancet 1997;350:1796).

One point for each of the following:

- Active cancer (treatment ongoing or within previous 6 months, or palliative)
- Paralysis, paresis, or plaster immobilization of lower extremities
- Recently bedridden for more than 3 days, or major surgery, within 4 weeks
- Localized tenderness along distribution of the deep venous system
- Entire leg swollen
- Calf swelling by more than 3 cm when compared with the asymptomatic leg (measured 10 cm below tibial tuberosity)
- Pitting edema (greater in the symptomatic leg)
- Collateral superficial veins (non-varicose)

### 7. Clinical symptoms of meningism

Meningism is the triad of nuchal **rigidity** (neck stiffness), **photophobia** (intolerance of bright light) and **headache**.

### 8. Clinical symptoms of nocardia

Symptoms vary and depend on the organs involved.

If in the lungs, symptoms may include:

- Chest pain when breathing (may occur suddenly or slowly)
- Coughing up blood
- Fevers
- Night sweats
- Weight loss

If in the brain, symptoms may include:

- Fever
- Headache
- Seizures
- If the skin is affected, symptoms may include:
  - Skin breakdown
  - Skin breakdown and abnormal passage or draining tract ([fistula](#))
  - Ulcers or nodules with infection sometimes spreading along lymph nodes

Some people with nocardia infection have no symptoms.

### 9. Symptoms of Pneumocystis Pneumonia

- Fever.
- Mild and dry cough or wheezing.
- Shortness of breath, especially with activity.
- Rapid breathing.
- Fatigue.
- Major weight loss.
- Chest pain when you breathe.

### 10. Clinical syndrome of bacterial pneumonia

- cough with thick yellow, green, or blood-tinged mucus.
- chest pain that worsens when coughing or breathing.
- sudden onset of chills.
- fever of 102°F or above (fever lower than 102°F in older persons)
- headache.
- muscle pain
- breathlessness or rapid breathing.

## RHICCA – Clinical endpoint diagnostic criteria vs 3.5 Apr 2018

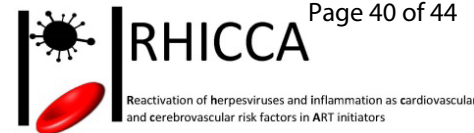

### 11. Clinical finding of Central Nervous System PML

- Deficits in motor function, especially **weakness** and **clumsiness**, are common
- associated altered mental state or behaviour and fever

### 12. Clinical finding of CNS toxoplasmosis

- Headaches
- Seizures
- Focal neurological deficit of a subacute onset
- confusion and coma
- A lung infection, causing cough, fever, and shortness of breath may co-exist.
- 

### 13. Clinical symptoms suggest of Aspergillosis;

- Fever and chills.
- Cough that brings up blood-streaked sputum (hemoptysis)
- Severe bleeding from the lungs.
- Shortness of breath.
- Chest or joint pain.
- Headaches or eye symptoms.
- Nosebleed
- Facial swelling on one side

**Table 1: Abbreviated NARS (Neuropsychiatric AIDS Rating Scale) Grading for HIV Encephalopathy**

Adapted from: Price RW, Brew BJ. The AIDS dementia complex. J Infect Dis 1988; 158 (5): 1079-83, and Hughes CP, Berg L, Danziger WL. A new clinical scale for the staging of dementia. Brit J Psych 1982; 140: 566-92.

| NARS stage | Cognitive-Behavioral Domains                          |                                                     |                                                     |                                                |                                                            |                                               |
|------------|-------------------------------------------------------|-----------------------------------------------------|-----------------------------------------------------|------------------------------------------------|------------------------------------------------------------|-----------------------------------------------|
|            | Orientation                                           | Memory                                              | Motor                                               | Behavior                                       | Problem solving                                            | Activities of daily living                    |
| 0.5        | fully oriented                                        | complains of memory problems                        | fully ambulatory slightly slowed movements          | normal                                         | has slight mental slowing                                  | slight impairment in business dealings        |
| 1          | fully oriented, may have brief periods of "spaciness" | mild memory problems                                | balance, co-ordination and handwriting difficulties | more irritable, labile or apathetic, withdrawn | difficulty planning and completing work                    | can do simple daily tasks, may need prompting |
| 2          | some disorientation                                   | memory moderately impaired, new learning impaired   | ambulatory but may require walking aid              | some impulsivity or agitated behavior          | severe impairment, poor social judgement, gets lost easily | needs assistance with ADLs                    |
| 3          | frequent disorientation                               | severe memory loss, only fragments of memory remain | ambulatory with assistance                          | may have organic psychosis                     | judgement very poor                                        | cannot live independently                     |
| 4          | confused and disoriented                              | virtually no memory                                 | bedridden                                           | mute and unresponsive                          | no problem solving ability                                 | nearly vegetative                             |

# RHICCA – Clinical endpoint diagnostic criteria vs 3.5 Apr 2018

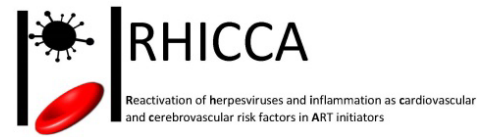

1  
2  
3  
4  
5  
6  
7  
8  
9  
10  
11  
12  
13  
14  
15  
16  
17  
18  
19  
20  
21  
22  
23  
24  
25  
26  
27  
28  
29  
30  
31  
32  
33  
34  
35  
36  
37  
38  
39  
40  
41  
42  
43  
44  
45  
46  
47  
48  
49  
50  
51  
52  
53  
54  
55  
56  
57  
58  
59  
60

For peer review only

# RHICCA – Clinical endpoint diagnostic criteria vs 3.5 Apr 2018

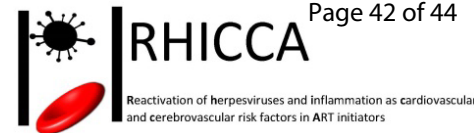

**Table 2: Diagnostic criteria for classification of definite, probable, possible, and not tuberculosis meningitis (Marais S, et al. Lancet Infect Dis 2010)**

|                                                                                                                                                                                                                                                                                                                                                                                                                                                                                                                                                                                                                                                                                                                        | Diagnostic score<br>(Maximum category score=6) |
|------------------------------------------------------------------------------------------------------------------------------------------------------------------------------------------------------------------------------------------------------------------------------------------------------------------------------------------------------------------------------------------------------------------------------------------------------------------------------------------------------------------------------------------------------------------------------------------------------------------------------------------------------------------------------------------------------------------------|------------------------------------------------|
| <b>Clinical criteria</b>                                                                                                                                                                                                                                                                                                                                                                                                                                                                                                                                                                                                                                                                                               |                                                |
| Symptom duration of more than 5 days                                                                                                                                                                                                                                                                                                                                                                                                                                                                                                                                                                                                                                                                                   | 4                                              |
| Systemic symptoms suggestive of tuberculosis (one or more of the following): weight loss (or poor weight gain in children), night sweats, or persistent cough for more than 2 weeks                                                                                                                                                                                                                                                                                                                                                                                                                                                                                                                                    | 2                                              |
| History of recent (within past year) close contact with an individual with pulmonary tuberculosis or a positive TST or IGRA (only in children <10 years of age)                                                                                                                                                                                                                                                                                                                                                                                                                                                                                                                                                        | 2                                              |
| Focal neurological deficit (excluding cranial nerve palsies)                                                                                                                                                                                                                                                                                                                                                                                                                                                                                                                                                                                                                                                           | 1                                              |
| Cranial nerve palsy                                                                                                                                                                                                                                                                                                                                                                                                                                                                                                                                                                                                                                                                                                    | 1                                              |
| Altered consciousness                                                                                                                                                                                                                                                                                                                                                                                                                                                                                                                                                                                                                                                                                                  | 1                                              |
| <b>CSF criteria</b>                                                                                                                                                                                                                                                                                                                                                                                                                                                                                                                                                                                                                                                                                                    | (Maximum category score=4)                     |
| Clear appearance                                                                                                                                                                                                                                                                                                                                                                                                                                                                                                                                                                                                                                                                                                       | 1                                              |
| Cells: 10–500 per $\mu$ l                                                                                                                                                                                                                                                                                                                                                                                                                                                                                                                                                                                                                                                                                              | 1                                              |
| Lymphocytic predominance (>50%)                                                                                                                                                                                                                                                                                                                                                                                                                                                                                                                                                                                                                                                                                        | 1                                              |
| Protein concentration greater than 1 g/L                                                                                                                                                                                                                                                                                                                                                                                                                                                                                                                                                                                                                                                                               | 1                                              |
| CSF to plasma glucose ratio of less than 50% or an absolute CSF glucose concentration less than 2.2mmol/L                                                                                                                                                                                                                                                                                                                                                                                                                                                                                                                                                                                                              | 1                                              |
| <b>Cerebral imaging criteria</b>                                                                                                                                                                                                                                                                                                                                                                                                                                                                                                                                                                                                                                                                                       | (Maximum category score=6)                     |
| Hydrocephalus                                                                                                                                                                                                                                                                                                                                                                                                                                                                                                                                                                                                                                                                                                          | 1                                              |
| Basal meningeal enhancement                                                                                                                                                                                                                                                                                                                                                                                                                                                                                                                                                                                                                                                                                            | 2                                              |
| Tuberculoma                                                                                                                                                                                                                                                                                                                                                                                                                                                                                                                                                                                                                                                                                                            | 2                                              |
| Infarct                                                                                                                                                                                                                                                                                                                                                                                                                                                                                                                                                                                                                                                                                                                | 1                                              |
| Pre-contrast basal hyperdensity                                                                                                                                                                                                                                                                                                                                                                                                                                                                                                                                                                                                                                                                                        | 2                                              |
| Evidence of tuberculosis elsewhere                                                                                                                                                                                                                                                                                                                                                                                                                                                                                                                                                                                                                                                                                     | (Maximum category score=4)                     |
| <b>Chest radiograph</b> suggestive of active tuberculosis: signs of tuberculosis=2; miliary tuberculosis=4                                                                                                                                                                                                                                                                                                                                                                                                                                                                                                                                                                                                             | 2/4                                            |
| <b>CT/ MRI/</b> ultrasound evidence for tuberculosis outside the CNS                                                                                                                                                                                                                                                                                                                                                                                                                                                                                                                                                                                                                                                   | 2                                              |
| <b>AFB</b> identified or <i>Mycobacterium tuberculosis</i> cultured from another source—ie, sputum, lymph node, gastric washing, urine, blood culture                                                                                                                                                                                                                                                                                                                                                                                                                                                                                                                                                                  | 4                                              |
| Positive commercial <i>M tuberculosis</i> NAAT from extra-neural specimen                                                                                                                                                                                                                                                                                                                                                                                                                                                                                                                                                                                                                                              | 4                                              |
| <b>Exclusion of alternative diagnoses</b>                                                                                                                                                                                                                                                                                                                                                                                                                                                                                                                                                                                                                                                                              |                                                |
| An alternative diagnosis must be confirmed microbiologically (by stain, culture, or NAAT when appropriate), serologically (eg, syphilis), or histopathologically (eg, lymphoma). The list of alternative diagnoses that should be considered, dependent upon age, immune status, and geographical region, include: pyogenic bacterial meningitis, cryptococcal meningitis, syphilitic meningitis, viral meningo-encephalitis, cerebral malaria, parasitic or eosinophilic meningitis ( <i>Angiostrongylus cantonesis</i> , <i>Gnathostoma spinigerum</i> , toxocariasis, cysticercosis), cerebral toxoplasmosis and bacterial brain abscess (space-occupying Lesion on cerebral imaging) and malignancy (eg, lymphoma) |                                                |
| TST=tuberculin skin test. IGRA=interferon-gamma release assay. NAAT=nucleic acid amplification test. AFB=acid-fast bacilli. The individual points for each criterion (one, two, or four points) were determined by consensus and by considering their quantified diagnostic value as defined in studies.                                                                                                                                                                                                                                                                                                                                                                                                               |                                                |

**Key:**

**Bold text:** of the options available likely to be the only tool available in a Malawi setting

**Greyed out text:** ideal investigation but not available in a Malawi setting <http://www.bmjopen.com/site/about/guidelines.xhtml>

## STROBE Statement—checklist of items that should be included in reports of observational studies

|                              | Item No   | Recommendation                                                                                                                                                                                                                                                                                                                                                                                                                                                                                                                                                                                                                                                                                   |
|------------------------------|-----------|--------------------------------------------------------------------------------------------------------------------------------------------------------------------------------------------------------------------------------------------------------------------------------------------------------------------------------------------------------------------------------------------------------------------------------------------------------------------------------------------------------------------------------------------------------------------------------------------------------------------------------------------------------------------------------------------------|
| <b>Title and abstract</b>    | <b>1</b>  | (a) Indicate the study's design with a commonly used term in the title or the abstract<br>(b) Provide in the abstract an informative and balanced summary of what was done and what was found                                                                                                                                                                                                                                                                                                                                                                                                                                                                                                    |
| <b>Introduction</b>          |           |                                                                                                                                                                                                                                                                                                                                                                                                                                                                                                                                                                                                                                                                                                  |
| Background/rationale         | <b>2</b>  | Explain the scientific background and rationale for the investigation being reported                                                                                                                                                                                                                                                                                                                                                                                                                                                                                                                                                                                                             |
| Objectives                   | <b>3</b>  | State specific objectives, including any prespecified hypotheses                                                                                                                                                                                                                                                                                                                                                                                                                                                                                                                                                                                                                                 |
| <b>Methods</b>               |           |                                                                                                                                                                                                                                                                                                                                                                                                                                                                                                                                                                                                                                                                                                  |
| Study design                 | <b>4</b>  | Present key elements of study design early in the paper                                                                                                                                                                                                                                                                                                                                                                                                                                                                                                                                                                                                                                          |
| Setting                      | <b>5</b>  | Describe the setting, locations, and relevant dates, including periods of recruitment, exposure, follow-up, and data collection                                                                                                                                                                                                                                                                                                                                                                                                                                                                                                                                                                  |
| Participants                 | <b>6</b>  | (a) <i>Cohort study</i> —Give the eligibility criteria, and the sources and methods of selection of participants. Describe methods of follow-up<br><i>Case-control study</i> —Give the eligibility criteria, and the sources and methods of case ascertainment and control selection. Give the rationale for the choice of cases and controls<br><i>Cross-sectional study</i> —Give the eligibility criteria, and the sources and methods of selection of participants<br>(b) <i>Cohort study</i> —For matched studies, give matching criteria and number of exposed and unexposed<br><i>Case-control study</i> —For matched studies, give matching criteria and the number of controls per case |
| Variables                    | <b>7</b>  | Clearly define all outcomes, exposures, predictors, potential confounders, and effect modifiers. Give diagnostic criteria, if applicable                                                                                                                                                                                                                                                                                                                                                                                                                                                                                                                                                         |
| Data sources/<br>measurement | <b>8*</b> | For each variable of interest, give sources of data and details of methods of assessment (measurement). Describe comparability of assessment methods if there is more than one group                                                                                                                                                                                                                                                                                                                                                                                                                                                                                                             |
| Bias                         | <b>9</b>  | Describe any efforts to address potential sources of bias                                                                                                                                                                                                                                                                                                                                                                                                                                                                                                                                                                                                                                        |
| Study size                   | <b>10</b> | Explain how the study size was arrived at                                                                                                                                                                                                                                                                                                                                                                                                                                                                                                                                                                                                                                                        |
| Quantitative variables       | <b>11</b> | Explain how quantitative variables were handled in the analyses. If applicable, describe which groupings were chosen and why                                                                                                                                                                                                                                                                                                                                                                                                                                                                                                                                                                     |
| Statistical methods          | <b>12</b> | (a) Describe all statistical methods, including those used to control for confounding<br>(b) Describe any methods used to examine subgroups and interactions<br>(c) Explain how missing data were addressed<br>(d) <i>Cohort study</i> —If applicable, explain how loss to follow-up was addressed<br><i>Case-control study</i> —If applicable, explain how matching of cases and controls was addressed<br><i>Cross-sectional study</i> —If applicable, describe analytical methods taking account of sampling strategy<br>(e) Describe any sensitivity analyses                                                                                                                                |

Continued on next page

**Results**

|                  |     |                                                                                                                                                                                                                                                                                                                                                                                                               |
|------------------|-----|---------------------------------------------------------------------------------------------------------------------------------------------------------------------------------------------------------------------------------------------------------------------------------------------------------------------------------------------------------------------------------------------------------------|
| Participants     | 13* | (a) Report numbers of individuals at each stage of study—eg numbers potentially eligible, examined for eligibility, confirmed eligible, included in the study, completing follow-up, and analysed<br>(b) Give reasons for non-participation at each stage<br>(c) Consider use of a flow diagram                                                                                                               |
| Descriptive data | 14* | (a) Give characteristics of study participants (eg demographic, clinical, social) and information on exposures and potential confounders<br>(b) Indicate number of participants with missing data for each variable of interest<br>(c) <i>Cohort study</i> —Summarise follow-up time (eg, average and total amount)                                                                                           |
| Outcome data     | 15* | <i>Cohort study</i> —Report numbers of outcome events or summary measures over time<br><i>Case-control study</i> —Report numbers in each exposure category, or summary measures of exposure<br><i>Cross-sectional study</i> —Report numbers of outcome events or summary measures                                                                                                                             |
| Main results     | 16  | (a) Give unadjusted estimates and, if applicable, confounder-adjusted estimates and their precision (eg, 95% confidence interval). Make clear which confounders were adjusted for and why they were included<br>(b) Report category boundaries when continuous variables were categorized<br>(c) If relevant, consider translating estimates of relative risk into absolute risk for a meaningful time period |
| Other analyses   | 17  | Report other analyses done—eg analyses of subgroups and interactions, and sensitivity analyses                                                                                                                                                                                                                                                                                                                |

**Discussion**

|                  |    |                                                                                                                                                                            |
|------------------|----|----------------------------------------------------------------------------------------------------------------------------------------------------------------------------|
| Key results      | 18 | Summarise key results with reference to study objectives                                                                                                                   |
| Limitations      | 19 | Discuss limitations of the study, taking into account sources of potential bias or imprecision. Discuss both direction and magnitude of any potential bias                 |
| Interpretation   | 20 | Give a cautious overall interpretation of results considering objectives, limitations, multiplicity of analyses, results from similar studies, and other relevant evidence |
| Generalisability | 21 | Discuss the generalisability (external validity) of the study results                                                                                                      |

**Other information**

|         |    |                                                                                                                                                               |
|---------|----|---------------------------------------------------------------------------------------------------------------------------------------------------------------|
| Funding | 22 | Give the source of funding and the role of the funders for the present study and, if applicable, for the original study on which the present article is based |
|---------|----|---------------------------------------------------------------------------------------------------------------------------------------------------------------|

\*Give information separately for cases and controls in case-control studies and, if applicable, for exposed and unexposed groups in cohort and cross-sectional studies.

**Note:** An Explanation and Elaboration article discusses each checklist item and gives methodological background and published examples of transparent reporting. The STROBE checklist is best used in conjunction with this article (freely available on the Web sites of PLoS Medicine at <http://www.plosmedicine.org/>, Annals of Internal Medicine at <http://www.annals.org/>, and Epidemiology at <http://www.epidem.com/>). Information on the STROBE Initiative is available at [www.strobe-statement.org](http://www.strobe-statement.org).

# BMJ Open

**Protocol for a longitudinal cohort study to evaluate the reactivation of herpesviruses and inflammation as cardiovascular and cerebrovascular risk factors in antiretroviral therapy initiators, in an African HIV-infected population (RHICCA)**

|                                 |                                                                                                                                                                                                                                                                                                                                                                                                                                                                                                                                                                                                                                                                                                                                                                                                                                                                                                                                                                                                                                                                                                                                                                                                                                                                                                                                                                                                                                                                                                                                       |
|---------------------------------|---------------------------------------------------------------------------------------------------------------------------------------------------------------------------------------------------------------------------------------------------------------------------------------------------------------------------------------------------------------------------------------------------------------------------------------------------------------------------------------------------------------------------------------------------------------------------------------------------------------------------------------------------------------------------------------------------------------------------------------------------------------------------------------------------------------------------------------------------------------------------------------------------------------------------------------------------------------------------------------------------------------------------------------------------------------------------------------------------------------------------------------------------------------------------------------------------------------------------------------------------------------------------------------------------------------------------------------------------------------------------------------------------------------------------------------------------------------------------------------------------------------------------------------|
| Journal:                        | <i>BMJ Open</i>                                                                                                                                                                                                                                                                                                                                                                                                                                                                                                                                                                                                                                                                                                                                                                                                                                                                                                                                                                                                                                                                                                                                                                                                                                                                                                                                                                                                                                                                                                                       |
| Manuscript ID                   | bmjopen-2018-025576.R1                                                                                                                                                                                                                                                                                                                                                                                                                                                                                                                                                                                                                                                                                                                                                                                                                                                                                                                                                                                                                                                                                                                                                                                                                                                                                                                                                                                                                                                                                                                |
| Article Type:                   | Protocol                                                                                                                                                                                                                                                                                                                                                                                                                                                                                                                                                                                                                                                                                                                                                                                                                                                                                                                                                                                                                                                                                                                                                                                                                                                                                                                                                                                                                                                                                                                              |
| Date Submitted by the Author:   | 08-Jan-2019                                                                                                                                                                                                                                                                                                                                                                                                                                                                                                                                                                                                                                                                                                                                                                                                                                                                                                                                                                                                                                                                                                                                                                                                                                                                                                                                                                                                                                                                                                                           |
| Complete List of Authors:       | Peterson, Ingrid; Liverpool School of Tropical Medicine; Malawi Liverpool Wellcome Trust Clinical Research Programme<br>Ntsui, Ntobeko; University of Cape Town<br>Jambo, Kondwani; Liverpool School of Tropical Medicine; Malawi Liverpool Wellcome Trust Clinical Research Programme<br>Kelly, Christine; Malawi Liverpool Wellcome Trust Clinical Research Programme; University College Dublin<br>Huwa, Jacqueline; Malawi Liverpool Wellcome Trust Clinical Research Programme<br>Afran, Louise; Malawi Liverpool Wellcome Trust Clinical Research Programme<br>Tatuene, Joseph; University of Liverpool, Institute of Infection and Global Health; Malawi-Liverpool-Wellcome Trust Clinical Research Programme,<br>Pett, Sarah; University College London, Institute of Infection and Global Health; University of New South Wales, Kirby Institute<br>Henrion, Marc; Malawi Liverpool Wellcome Trust Clinical Research Programme; Liverpool School of Tropical Medicine<br>Van Oosterhout, Joep; University of Malawi College of Medicine; Dignitas International<br>Heyderman, Robert; University College London, Division of Infection and Immunity; University of Malawi College of Medicine, Malawi Liverpool Wellcome Trust Clinical Research Programme<br>Mwandumba, Henry; Liverpool School of Tropical Medicine; Malawi Liverpool Wellcome Trust Clinical Research Programme<br>Benjamin, Laura; University of Liverpool Institute of Infection and Global Health, ; University College London Institute of Neurology, |
| <b>Primary Subject Heading</b>: | Cardiovascular medicine                                                                                                                                                                                                                                                                                                                                                                                                                                                                                                                                                                                                                                                                                                                                                                                                                                                                                                                                                                                                                                                                                                                                                                                                                                                                                                                                                                                                                                                                                                               |
| Secondary Subject Heading:      | HIV/AIDS, Immunology (including allergy), Infectious diseases, Global health                                                                                                                                                                                                                                                                                                                                                                                                                                                                                                                                                                                                                                                                                                                                                                                                                                                                                                                                                                                                                                                                                                                                                                                                                                                                                                                                                                                                                                                          |
| Keywords:                       | Ischaemic heart disease < CARDIOLOGY, EPIDEMIOLOGY, HIV & AIDS < INFECTIOUS DISEASES, Stroke medicine < INTERNAL MEDICINE, Cardiovascular                                                                                                                                                                                                                                                                                                                                                                                                                                                                                                                                                                                                                                                                                                                                                                                                                                                                                                                                                                                                                                                                                                                                                                                                                                                                                                                                                                                             |

1  
2  
3  
4  
5  
6  
7  
8  
9  
10  
11  
12  
13  
14  
15  
16  
17  
18  
19  
20  
21  
22  
23  
24  
25  
26  
27  
28  
29  
30  
31  
32  
33  
34  
35  
36  
37  
38  
39  
40  
41  
42  
43  
44  
45  
46  
47  
48  
49  
50  
51  
52  
53  
54  
55  
56  
57  
58  
59  
60

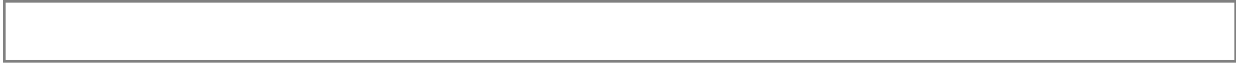

SCHOLARONE™  
Manuscripts



BMJ OPEN

**Title:** Protocol for a longitudinal cohort study to evaluate the reactivation of herpesviruses and inflammation as cardiovascular and cerebrovascular risk factors in antiretroviral therapy initiators, in an African HIV-infected population (RHICCA)

**Authors:**

Ingrid Peterson<sup>1,2</sup>, Ntobeko Ntsui<sup>3</sup>, Kondwani C Jambo<sup>1,2</sup>, Christine Kelly<sup>1,4</sup>, Jacqueline Huwa<sup>1</sup>, Louise Afran<sup>1</sup>, Joseph Kamtchum-Tatuene<sup>5</sup>, Sarah Pett<sup>6,7,8</sup>, Marc Henrion<sup>1,2</sup>, Joep Van Oosterhout<sup>9,10</sup>, Robert Heyderman<sup>11</sup>, Henry C Mwandumba<sup>1,2</sup>, Laura A Benjamin<sup>4,12\*\*</sup> and for the Investigators of the RHICCA study\*

**Affiliations:**

1. Malawi-Liverpool-Wellcome Trust Clinical Research Programme, University of Malawi College of Medicine
2. Department of Clinical Sciences, Liverpool School of Tropical Medicine
3. Department of Medicine, University of Cape Town
4. HIV Molecular Research Group, University College Dublin
5. Institute of Infection and Global Health, University of Liverpool
6. Institute of Global Health, University College London
7. MRC CTU at UCL, Institute of Medicine, Clinical Trials and Methodology, University College London
8. Kirby Institute, University of New South Wales, Australia
9. Dignitas International, PO Box 071, Zomba, Malawi
10. College of Medicine, University of Malawi
11. Department of Infection and Immunity, University College London
12. Department of Brain Repair and Rehabilitation, Institute of Neurology, UCL

BMJ OPEN

\*The Investigators of the RHICCA study

Brian Angus - Oxford Centre for Clinical Tropical Medicine, University of Oxford

Myles Connor - University of Edinburgh

Reena Dwivedi - Greater Manchester Neurosciences Centre, Salford Royal Foundation Trust

Lewis Haddow - Institute for Global Health, University College London

Terttu Heikinheimo-Connell - Hyvinkää Hospital, Department of Neurology, University of Helsinki

Elizabeth Joekes - Liverpool School of Tropical Medicine

Vanessa Kandoole - Department of Medicine, University of Malawi College of Medicine, Blantyre

Moffat Nyrienda - MRC Research Unit, Uganda

Kennedy Malisita- Department of Medicine, Queen Elizabeth Central Hospital

Jane Mallewa- Department of Medicine, University of Malawi College of Medicine, Blantyre

Elsayed Z. Soliman - School of Medicine, Wake Forest School of Medicine

Tom Solomon - Institute of Infection and Global Health, University of Liverpool

\*\*Corresponding author

Laura Benjamin

Institute of Infection and Global Health,

Ronald Ross building,

The University of Liverpool,

L69 7BE, Liverpool,

United Kingdom

1  
2  
3  
4  
5  
6  
7  
8  
9  
10  
11  
12  
13  
14  
15  
16  
17  
18  
19  
20  
21  
22  
23  
24  
25  
26  
27  
28  
29  
30  
31  
32  
33  
34  
35  
36  
37  
38  
39  
40  
41  
42  
43  
44  
45  
46  
47  
48  
49  
50  
51  
52  
53  
54  
55  
56  
57  
58  
59  
60

BMJ OPEN

[l.benjamin@liverpool.ac.uk](mailto:l.benjamin@liverpool.ac.uk)

**Key words:**

Cardiovascular, cerebrovascular, HIV, herpesvirus, Immune dysregulation,

**Journal Guidance:**

Abstract word count: 300/300

Article word count: 4095 /4000

Figure/Table: 5/5

BMJ OPEN

**ABSTRACT**

**Introduction:** In Sub-Saharan Africa, rising rates of cerebrovascular and cardiovascular disease (CBD/CVD) are intersecting with an aging HIV-infected population. The widespread use of antiretroviral therapy (ART) may confer an additive risk and may not completely suppress the risk associated with HIV infection. High-quality prospective studies are needed to determine if HIV-infected patients in Africa are at increased risk of CBD/CVD and to identify factors associated with this risk. This study will test the hypothesis that immune activation and dysfunction, driven by HIV and reactivation of latent herpesvirus infections lead to increased CBD/CVD risk in Malawian adults aged  $\geq 35$  years.

**Methods and Analysis:** We will conduct a single-centre 36-month prospective cohort study in 800 HIV-infected patients initiating antiretroviral therapy (ART) and 190 HIV-uninfected controls in Blantyre, Malawi. Patients and controls will be recruited from government ART clinics and the community, respectively and will be frequency-matched by 5-year age band and sex. At baseline and follow-up visits, we will measure carotid intima thickness (CIMT), pulse wave velocity (PWV) as surrogate markers of vasculopathy, and thus CBD/CVD risk. Our primary exposures of interest will be prospectively measured; these include cytomegalovirus and varicella zoster reactivation, changes in HIV plasma viral load, and markers of systemic inflammation and endothelial function. Multivariable regression models will be developed to assess the study's primary hypothesis. The occurrence of clinical CBD/CVD will be assessed as secondary study endpoints. ISRCTN registry <https://doi.org/10.1186/ISRCTN42862937>.

**Ethics and dissemination:** This was approved by the University of Malawi College of Medicine and the Liverpool School of Tropical Medicine research ethics committees. Our goal is to gain insight into the pathogenesis of cardiovascular and cerebrovascular disease among HIV cohorts on ART, in sub-Saharan Africa, and provide data to inform future interventional clinical trials. This study started in May 2017 and will continue until August 2020.

#### STRENGTHS AND LIMITATIONS

- This is one of the first large-scale studies in Sub-Saharan Africa to explore the relationship between HIV infection, latent herpesviruses, inflammation and cardiovascular and cerebrovascular diseases, immediately after starting antiretroviral therapy (ART).
- Clinical events and death will be comprehensively reviewed through an end-point review committee, using strict diagnostic criteria for events based on those used in the INSIGHT network, or validated verbal autopsy for death with limited data.
- Because of the recent roll-out of ART in asymptomatic patients, there will be an absence of ART-naïve population, limiting our ability to explore the impact of ART.
- Approximately one-third of strokes will be asymptomatic. We anticipate not capturing some of these. However, multiple cerebral infarcts without a focal neurological deficit will manifest as cognitive impairment, which we will screen for, and corroborate with MRI imaging in a small number of symptomatic cases.
- Two-thirds of myocardial infarction will be silent and could potentially be missed. In a nested group, we will use a digital electrocardiogram to evaluate this further.

BMJ OPEN

**INTRODUCTION**

The growing epidemic of cerebrovascular disease (CBD e.g. Stroke) and cardiovascular disease (CVD e.g. myocardial infarction) now intersects with the HIV epidemic<sup>1</sup>. Countries like Malawi, have an adult HIV prevalence of approximately 10%<sup>2</sup>. There is an increased life expectancy among people living with HIV, largely because of the successful scale-up of ART<sup>3</sup>. In Europe and the US, HIV is associated with a 50% increased risk of CVD compared to HIV-uninfected populations<sup>4</sup>, attributable to long-term antiretroviral therapy (ART) use and HIV *per se*<sup>4 5</sup>. HIV infection is also associated with a 1.8 fold increased risk of all-cause heart failure in US veterans<sup>6</sup>. Our recent case-control study of stroke in Malawian adults is one of several examples that demonstrates a high risk of HIV infection associated with stroke and heart disease, pointing to a considerable and unappreciated CBD/CVD risk among HIV patients, in this setting<sup>7-10</sup>.

There are reports of geographical differences in the distribution of CVD risk factors, supporting the argument that evidence derived from high-income countries cannot be applied to Sub-Saharan (SSA)<sup>11</sup>. Addressing this knowledge gap is essential to the development of clinical drug trials for primary prevention of CBD/CVD among individuals living with HIV. Vasculopathy due to accelerated atherosclerosis, arterial stiffening and vasculitis are the major mechanisms believed to underlie the CBD/CVD burden<sup>12 13</sup>. It is hypothesized that despite viral suppression, low-grade HIV virus replication and the associated host systemic inflammation are important drivers of this vasculopathy (Figure 1). In patients receiving ART, HIV antigenemia, partly resulting from HIV persistence in sanctuary sites, incomplete virologic suppression and virologic resurgence, drives the chronic immune activation observed in about 20% of ART patients in SSA<sup>14</sup>. This immune state is characterized by ongoing activation and senescence of cell-mediated immunity<sup>15 16</sup>, increased monocyte/macrophage activation, stimulation of the interleukin-6 (IL-6) pathway and production of acute phase proteins<sup>17-19</sup>. Activation of the IL-6 pathway is established with atherosclerosis<sup>20 21</sup>, and may also contribute to non-atherosclerotic vasculopathy. Inflammation alone confers a 2-fold increased risk of clinical CBD/CVD events<sup>22</sup>. The current push to introduce more effective ART regimens, and to start treatment soon after HIV diagnosis is made, may reduce inflammation and in turn, CBD/CVD risk<sup>23</sup>. However, there is

BMJ OPEN

1  
2  
3 growing evidence of chronic inflammation in HIV despite achieving the goal of therapy,  
4 which is long-term suppression (<50 copies/mL) of plasma viral load, suggesting adjunctive  
5 therapy may be required.<sup>24-26</sup>  
6  
7  
8  
9

10  
11 In addition to HIV, there is compelling evidence that reactivation of latent herpesviruses  
12 may be an important cause of vasculopathy. In HIV-uninfected elderly populations from  
13 high-income settings, latent cytomegalovirus (CMV) infection drives dysregulation of cell-  
14 mediated immunity<sup>15 27-29</sup>, not dissimilar to what's described in HIV-associated immune  
15 activation<sup>29</sup>. CMV and other viral proteins have been found in atherosclerotic plaques<sup>20</sup>.  
16  
17 Varicella-zoster virus (VZV) can directly infect the vascular endothelium to cause vasculitis  
18 and subsequent stroke and was found to be the commonest opportunistic infection  
19 (prevalence 15%) in a study of HIV-infected stroke patients in Malawi<sup>12</sup>. The  
20 seroprevalence of herpesviruses is high in SSA<sup>30</sup>, particularly in HIV-infected populations<sup>16</sup>.  
21  
22  
23  
24  
25  
26  
27  
28

29  
30 The involvement of herpesviruses in the mechanistic pathway for CBD/CVD is compelling  
31 and may offer additional therapeutic avenues, especially for CMV and VZV. However, our  
32 understanding is incomplete, and its population impact is yet to be defined. It is important  
33 to determine if, in addition to ART, there is a role for other pharmacological interventions  
34 targeting latent viral infections or downstream inflammatory pathways to reduce  
35 vasculopathy in HIV-infected patients on ART. Previous work from North America supports  
36 the potential of treating reactivated herpesviruses<sup>31</sup>. Furthermore, there are opportunities  
37 for intervention using the recently licensed Letemovir; a treatment for CMV. By focusing on  
38 HIV and Herpes viral antigenemia and immune dysregulation as mechanisms of  
39 vasculopathy, this study will identify subgroups of HIV-infected patients on ART at high risk  
40 of CBD/CVD, the timing of CBD/CVD risk in such patients, as well as potential targets for  
41 intervention.  
42  
43  
44  
45  
46  
47  
48  
49  
50  
51  
52  
53  
54  
55  
56  
57  
58  
59  
60

BMJ OPEN

**STUDY OBJECTIVES**

This study will test the hypothesis that immune activation and dysfunction, driven by HIV and reactivation of latent CMV/VZV herpesvirus infections lead to increased CBD/CVD risk in adults aged  $\geq 35$  years in SSA. We will address this through the following objectives;

- 1) To determine if progression of the surrogate marker of CBD/CVD or occurrence of new-onset vasculopathy is higher in adults aged  $\geq 35$  years with HIV infection on ART compared to those without HIV.
- 2) To determine if progression of surrogate markers of CBD/CVD or occurrence of new-onset vasculopathy is higher in adults aged  $\geq 35$  years with HIV/herpes viral antigenemia or chronic immune activation compared to those without HIV/herpes viral antigenemia or chronic immune activation. Specifically, we will determine if progression of surrogate markers or new-onset vasculopathy is higher:
  - a. in ART patients with reactivated latent herpes viral infection, compared to those without reactivated latent herpes viral infection.
  - b. in ART patients with the highest 25% of markers for immune activation, inflammation or endothelial activation compared to the bottom 25%
  - c. in ART patients with incomplete virologic suppression or virologic resurgence of HIV, compared to those with suppressed HIV plasma viral load.

The secondary study objectives are to determine if viral antigenemia or chronic immune activation increase occurrence of the following clinical events: 1) stroke, 2) myocardial infarction (MI), 3) angina (excluding MI), 4) peripheral vascular disease (PVD), 5) all-cause death/vascular-related death and 6) immune reconstitution inflammatory vasculopathy.

**METHODS AND ANALYSIS**Study design

To address objective 1, we will conduct a single-center 36-month prospective cohort study in 800 HIV-infected patients initiating ART and 190 HIV-uninfected adults aged  $\geq 35$  years. HIV-infected and HIV-uninfected participants will be frequency matched by 5-year age band and sex. On a 6-monthly basis, we will measure markers of viral infection, inflammation and endothelial function along with surrogate markers for CBD/CVD (Table 1).



BMJ OPEN

### Study Setting

This study will recruit consecutive ART patients from the ART clinic of Queen Elizabeth Central Hospital (QECH), and ART clinics in several Blantyre City Community Health Centres (CHCs). These clinics collectively initiate over 100 HIV-infected patients aged  $\geq 35$  years onto ART each month. HIV-uninfected adults will be selected from pre-ART counseling sessions, and from randomly selected households in the community by two-stage random sampling (of households and individuals within households) from a previously enumerated sampling frame in the CHC catchment areas<sup>32</sup>. All study procedures will be conducted at QECH, which is located adjacent to the Malawi-Liverpool-Wellcome Trust Clinical Research Programme (MLW). QECH also hosts a 0.35T MRI imaging facility, which will contribute to characterizing our secondary endpoints.

### Study Participants

Study inclusion criteria will be: a) age  $\geq 35$  years and b) resident in Blantyre. HIV-infected patients must further be: c) ART-naïve or initiated ART  $<10$  days prior to enrolment and d) initiating standard first-line ART (in Malawi this is: Tenofovir [TDF]/Lamivudine [3TC]/Efavirenz [EFV]). Adult controls must further be: e) HIV-uninfected. Study exclusion criteria are: f) clinical history of CBD/CVD, g) pregnancy, h) critical illness or symptomatic anemia at baseline and i) enrollment in an intervention study. At the analysis stage abnormal PWV at baseline (as defined in Table 2) will be excluded for new-onset vasculopathy analysis but not for progression of vasculopathy. The same approach will be applied for baseline CIMT measurements. If the study participant becomes pregnant after recruitment, they will be withdrawn.

Justification of study inclusion and exclusion criteria is as follows; in many populations, CBD/CVD risk rises sharply from 35-years of age<sup>33</sup>, thus individuals aged 35 and older will be eligible (recruitment of participants aged 35 -39 will be limited to 15% of the study sample to avoid overrepresentation). Restricting recruitment by age will enable this study to have greater statistical power. For clarity of etiologic inference, the study will assess the risk of new-onset vasculopathy not associated with pregnancy and thus exclude patients who are pregnant or with a history of CBD/CVD. To eliminate confounding by ART regimen, patients

BMJ OPEN

1  
2  
3 must initiate on standard first-line ART (> 90% of ART patients in Blantyre do this). Critically  
4 ill patients are excluded primarily for ethical reasons.  
5  
6  
7  
8

### 9 Laboratory methods

#### 10 ***Surface immunophenotyping of peripheral blood mononuclear cells***

11  
12  
13  
14 Immunophenotyping will be used to characterize peripheral blood mononuclear cells  
15 (PBMC) isolated from blood samples of HIV-uninfected and HIV-infected ART initiators.  
16 PBMCs will be harvested by density centrifugation using lymphoprep (Axis Shield, UK).  
17 PBMCs ( $2 \times 10^6$ ) will be stained with anti-CD45 PerCP CY5.5, anti-CD3 AF700, anti-CD4 BV421,  
18 anti-CD8 PE Dazzle, anti-CD38 BV605, anti-HLA-DR APC CY7, anti-CD57 APC, anti-PD1 PE CY7,  
19 anti-CTLA4 PE, and anti-CD223 FITC (all from eBiosciences, UK) to determine the expression  
20 of these markers on the surface of T-cells. In addition, ( $2 \times 10^6$ ) PBMCs stained with anti-CD16  
21 BV421, anti-CD14 PE, anti-HLA-DR PerCP CY5.5, anti-CD45 AF700, anti-CCR2 BV605, anti-  
22 CD11b APC, anti-CX3CR1 PE Dazzle and anti-CD38 FITC (all from eBiosciences, UK) will be  
23 used for monocytes. Dead cells, CD3<sup>+</sup> T-cells, and CD56<sup>+</sup> NK cells will be excluded using:  
24 LIVE/DEAD™ Fixable Aqua Dead Cell Stain (Thermofisher, UK), anti-CD3 BV503 and anti-  
25 CD56 BV503 (eBiosciences, UK), respectively. Stained cells will be acquired on a BD LSR  
26 Fortessa flow cytometer (Becton Dickinson, USA) and data will be analyzed using FlowJo  
27 software version 10.0 (Tree Star, San Carlos, CA). For each stained sample analyzed, the  
28 median fluorescence intensity (MFI) for each parameter will be normalized to its respective  
29 unstained control.  
30  
31  
32  
33  
34  
35  
36  
37  
38  
39  
40  
41  
42  
43  
44  
45  
46

#### 47 ***Measurement of soluble markers of immune activation using multiplex bead array***

48  
49 A custom-made multiplex assay will be used to assess soluble markers of monocyte  
50 activation (CD163), systemic inflammation (Interleukin-6) and endothelial activation  
51 (Intracellular adhesion molecule 1) in plasma, isolated from blood samples of HIV-  
52 uninfected and HIV-infected ART initiators. Following isolation, plasma will be aliquoted and  
53 stored at -80°C until further use.  
54  
55  
56  
57  
58  
59  
60

1  
2  
3  
4  
5  
6  
7  
8  
9  
10  
11  
12  
13  
14  
15  
16  
17  
18  
19  
20  
21  
22  
23  
24  
25  
26  
27  
28  
29  
30  
31  
32  
33  
34  
35  
36  
37  
38  
39  
40  
41  
42  
43  
44  
45  
46  
47  
48  
49  
50  
51  
52  
53  
54  
55  
56  
57  
58  
59  
60

BMJ OPEN

### ***Assessment of exposure to human cytomegalovirus and varicella zoster virus by ELISA***

Quantitative VIDAS CMV IgG and IgM (BioMerieux, USA) and VZV glycoprotein IgG Low-Level Enzyme Immunoassay Kit [VaccZyme™EIA], will be used to determine exposure to these viruses using a commercial enzyme-linked immunosorbent assay (ELISA) platform. These kits will detect VZV antigen to a sensitivity and specificity of 97.8% and 96.8% respectively and for CMV, 97.2% and 100% for IgG and 100% and 97.4% for IgM respectively<sup>34 35</sup>. Plasma samples from HIV-uninfected and HIV-infected ART initiators stored at -80°C following collection will be used for these assessments

### ***HIV***

HIV infection will be diagnosed using two rapid tests in parallel, EIA rapid tests (Determine HIV-1/2 [Abbott Laboratories, USA] and Uni-Gold HIV [Trinity Biotech PLC, Ireland]), will be used as a tiebreak). HIV-1 RNA levels in plasma will be measured using the Abbott Real-Time HIV-1 assay with a lower limit of detection of 150 copies/mL (Abbott Molecular, Germany), according to the manufacturer's instructions. CD4+ T-cell count measurements will be performed using BD FACS Count machine (Partec platform).

### **Procedures**

Carotid-femoral pulse wave velocity (PWV)<sup>36</sup> and carotid intima-media thickness (CIMT)<sup>37</sup> measurement will be performed in accordance with expert consensus guidelines, using a standardized study protocol on the Vicorder system (SMART Medical, UK) and Philips CX50 machine (Philips healthcare, UK) respectively. CIMT measurements will be performed by three trained operators. The intra-class correlation coefficient will be used to assess the performance of the operators against that of a certified neurosonologist prior to study commencement.

BMJ OPEN

## Outcomes

### **Primary outcomes**

Primary outcomes are the progression of surrogate markers of CBD/CVD, namely PWV and CIMT as well as the occurrence of new-onset vasculopathy defined by threshold values outlined in Table 2.

### **Secondary outcomes**

Secondary outcomes are the following clinical events: 1) stroke, 2) myocardial infarction (MI), 3) unstable angina, 4) peripheral vascular disease (PVD), 5) all-cause death/vascular death and 6) immune reconstitution inflammatory syndrome (IRIS) vasculopathy (Table 2). Changes in PWV or endothelial activation at 6 months post ART initiation will be interpreted as a subclinical vascular IRIS event. These outcomes will be assessed through active surveillance in QECH inpatient wards for admissions of study participants. To improve capture of clinical outcomes, we will conduct brief telephone interviews with study participants about CBD/CVD symptoms and hospitalizations between study visits and facilitate unsolicited participant self-report. Clinical events and deaths in study participants will be reviewed by an independent endpoint review committee (ERC), comprising of clinicians experienced in Endpoint review. Each event will be reviewed and adjudicated by the ERC Chair and 2 ERC reviewers, using a standard set of diagnostic criteria (Table 2 and Supplement – S1). The format of reporting will be based on modifications of the [INSIGHT](#) network clinical diagnostic criteria. Deaths will be reviewed by the ERC using the CoDe approach<sup>23</sup>. For death with limited clinical data, a validated verbal autopsy will be performed to ascertain the cause<sup>38</sup>.

## Exposures

The exposure for Primary Objective 1 will be HIV status. Yearly HIV rapid tests in HIV-uninfected adults will be performed to exclude those with new HIV infections (Figure 2).

Potential confounding and mediating factors will be recorded in study participants. This will include demographic factors, lifestyle and behavioral factors (e.g. cigarette smoking and alcohol consumption), chronic co-morbidities (i.e. hypertension, diabetes), cardiometabolic,

BMJ OPEN

1  
2  
3 renal and hematological factors (i.e. full blood count, creatinine in urine and serum, body-  
4 mass-index, waist-to-hip ratio, random glucose, HbA1c, and lipid profile). Blood pressure will  
5 be measured at all study visits. Although vascular immune reconstitution inflammatory  
6 syndrome (IRIS) (Table 2) will be considered as a primary endpoint, non-vascular IRIS will be  
7 defined as a risk factor. Where feasible, we will conduct PCR tests for common causes of IRIS  
8 in blood or cerebrospinal fluid (CSF) samples. Adherence to ART and change of ART regimen  
9 will be assessed at all study visits through extraction of data from 'ART master cards'; this is  
10 a government-supported monitoring tool used by all patients on ART, in Malawi.  
11  
12  
13  
14  
15  
16  
17  
18  
19

20 For Objective 2a-2c, markers of herpes and HIV viral antigenemia and immune inflammation  
21 will be measured according to the outline in Table 1. For primary objective 2a, reactivated  
22 latent herpes viral infections will be assessed by quantification of VZV, and CMV antibodies.  
23 We will estimate the risk of atherosclerosis and arterial stiffening associated with current  
24 herpesviruses reactivation at baseline, and sustained reactivation (i.e. those that continue  
25 to have a high titer from measurement at baseline to 6 months after ART initiation).  
26 Hyperactivation of B cells may result in an expansion of polyclonal antibodies and thus an  
27 overestimation of virus-specific antibody titers. To address this issue and make appropriate  
28 adjustments for hypergammaglobulinemia we will 1) measure more than one herpesviruses  
29 and 2) measure total IgG.  
30  
31  
32  
33  
34  
35  
36  
37  
38  
39  
40

41 For primary objective 2b, markers of immune activation, inflammation, and endothelial  
42 activation will be measured (Figures 1 & Table 1). Quantitative cell surface  
43 immunophenotyping will be performed for CD4+ and CD8+ T-cell activation (e.g. HLA-DR)  
44 and senescence (e.g. CD57) in a subset of participants. In all study participants, at baseline,  
45 6, 12, months, we will measure soluble markers associated with systemic inflammation and  
46 endothelial activation.  
47  
48  
49  
50  
51  
52  
53  
54

55 For primary objective 2c, incomplete viral response and viral rebound of HIV will be  
56 measured by quantitative PCR in patients on ART.<sup>39</sup> HIV viral load will be measured in  
57 patients on ART at 0, 6 and 12 months.  
58  
59  
60

BMJ OPEN

### Data Collection Between May 2017 and August 2020

The two-stage screening will be conducted to find and recruit potential study participants. A trained field worker will first screen to assess eligibility for criteria (a)-(c) in pre-ART counseling sessions, and in individuals from randomly selected households in the community. Eligible participants will then be referred to QECH to complete screening for criteria (d)-(i) and if eligible, consented to participate in the study. At study visits, a tablet-based, standardized Open Data Kit (ODK) case report form (CRF) will be administered in one-on-one interviews by a study nurse to capture demographic and clinical data. Study data will be collected as outlined in Table 1. Daily upload of electronic data will occur with oversight from the data manager at MLW. We will collect up to 30ml of whole blood. An ACR dipstick test will be used to test for creatinine, proteinuria, and glucosuria. In a subset of participants, an electrocardiogram supported by a digital platform and echocardiogram will be performed at baseline, 6 and 24 months, as well as in any participant experiencing a clinical event suggestive of a cardiac etiology. To facilitate the retention and clinical referrals of participants, contact will be made every 3 months to assess the occurrence of clinical events. Participants who miss a scheduled study visit will be contacted by phone and/or visited at home to assess their willingness to maintain their participation and to record intervening clinical events. Recording and definitions of other clinical events, including HIV associated events will be evaluated by the ERC chair. SMS messages will be used for appointment reminders. Technical appendix, statistical code, and dataset will be made available from a data repository, after publication of our work.

### Sample Size and Statistical Analysis

The required sample size for the study's primary objectives is 800 HIV-infected patients and 190 HIV-uninfected adults using standard, normal distribution approximation sample size formulas for comparing proportions in two groups of unequal size and based on the following assumptions: **a)** 18.4% of HIV positive study participants have abnormal PWV at baseline. In our ongoing studies of vasculopathy in HIV-infected patients, 18.4% aged  $\geq 35$  years have a PWV ( $>12$  m/s), **b)** 20% of both HIV-infected patients and HIV-uninfected adults will be lost to follow-up, including by death and HIV sero-conversion<sup>40 41</sup>. **c)** The minimum relative risk (RR) of interest is 2 for Objective 1 and 1.8 for Objective 2. **d)** Cumulative risk of

BMJ OPEN

1  
2  
3 clinically significant vasculopathy over study follow-up is 18.4%. This is based on study data  
4 cited in (a). **e)** For objectives 2a-c), the exposure prevalence for each risk factor is 20%. **f)**  
5 Statistical tests will have 80% power based on a 2-sided test with;  $\alpha=0.05$ . Testing of  
6 hypotheses for the secondary outcome will be exploratory. However, we estimate 26  
7 strokes (4 mimics), an unknown number of MIs and 80 deaths occurring during the study<sup>7 42</sup>.  
8  
9  
10  
11  
12  
13  
14

15 The reporting of this study will be prepared in accordance with the STROBE guidelines<sup>43</sup>.  
16 Summary and descriptive statistics will be tabulated for all primary and secondary outcome  
17 variables, as well as for exposure variables and potential confounding or mediating factors.  
18 Time plots for all outcome variables will be inspected. Quantitative data analysis will be  
19 conducted to assess the primary outcomes.  
20  
21  
22  
23  
24  
25  
26

27 There will be 3 analysis time points: 1) after recruitment has finished and baseline data is  
28 available for all participants (baseline analysis), 2) once every participant has completed 6  
29 months in the study (6-month analysis) and 3) at 36 months, when each participant has  
30 completed 24 months in the study (final analysis).  
31  
32  
33  
34

35 The baseline analysis will largely consist of descriptive statistics on participant characteristics  
36 and data recorded at baseline. Simple regression models will also be used to investigate  
37 relationships between exposure and outcome variables measured at baseline. Unadjusted  
38 analyses will consist of paired t-tests or Wilcoxon signed rank tests (depending whether the  
39 data are normally distributed or not) for continuously measured variables and Chi-Squared or  
40 Fisher's exact tests (depending on contingency table cell counts) for binary and categorical  
41 variables. Adjusted analyses will be conducted using generalised linear models (GLMs).  
42  
43  
44  
45  
46  
47  
48  
49

50 The 6-month analysis will be limited in scope and serves 2 purposes: 1) characterise new onset  
51 vasculopathy in HIV-infected participants that have initiated ART treatment at baseline  
52 (vascular IRIS) and 2) define vasculopathy outcomes for the final analysis. The main analysis  
53 of the study data happens at the final analysis time point.  
54  
55  
56  
57  
58  
59  
60

## BMJ OPEN

1  
2  
3 For objective 1 we will develop three regression models. Two GLMs will be developed to  
4 compare mean progression of arterial damage from baseline in HIV-infected ART patients and  
5 HIV-uninfected adults. These models will regress change from baseline in PWV, respectively  
6 cIMT, on HIV status. We will develop a third model to estimate the RR and population  
7 attributable fraction of new-onset arterial damage in HIV-infected patients compared to HIV-  
8 uninfected adults.  
9  
10  
11  
12  
13  
14  
15  
16

17 For objective 2a, a set of GLMs will be developed to compare mean progression of  
18 vasculopathy in HIV-infected ART patients with and without reactivated latent herpes viral  
19 infection. These models will regress change from baseline in PWV, respectively cIMT, on two  
20 log-transformed variables for antibody titres of CMV and VZV, respectively.  
21  
22  
23  
24  
25  
26

27 For objective 2b, we will again fit a set GLMs, with change from baseline in PWV as response  
28 variable, this time to investigate if, in HIV-infected ART patients, there is an association  
29 between progression of vasculopathy and immune activation and inflammation biomarkers  
30 (IL-6, ICAM, CD163). Specifically, for each marker, we will regress PWV on marker quantiles.  
31 After having built models for each marker, we will then develop comprehensive multiple  
32 regression models for PWV and cIMT with multiple independent markers as predictor  
33 variables.  
34  
35  
36  
37  
38  
39  
40  
41  
42

43 For objective 2c, we will proceed as for objective 2a, but comparing HIV-infected ART patients  
44 with incomplete virological suppression or virological resurgence of HIV to those with  
45 suppressed HIV plasma viral load.  
46  
47  
48  
49  
50

51 In addition to these analyses, given the repeated measurements for PWV, immune  
52 activation, inflammation markers, we will extent the GLMs for PWV to linear mixed models  
53 taking full account of the longitudinal nature of the data. Mixed models will also handle  
54 deviations from the visit schedule in a principled fashion and use all available data for drop-  
55  
56  
57  
58  
59  
60



BMJ OPEN

1  
2  
3  
4  
5  
6  
7  
8  
9  
10  
11  
12  
13  
14  
15  
16  
17  
18  
19  
20  
21  
22  
23  
24  
25  
26  
27  
28  
29  
30  
31  
32  
33  
34  
35  
36  
37  
38  
39  
40  
41  
42  
43  
44  
45  
46  
47  
48  
49  
50  
51  
52  
53  
54  
55  
56  
57  
58  
59  
60  
outs. In the case a log link function is required for PWV in the GLMs, we will fit marginalised models using GEE instead of the LMMs.

For secondary study objectives, we will use univariate methods to assess the frequency of clinical events within exposure strata. If there are sufficient numbers of clinical events we will develop Poisson or negative binomial regression models (depending on model fit) for each clinical event type to compare exposure-defined participants.

We will also use time-to-event models, specifically Cox proportional hazard models, to investigate associations between all-cause mortality and exposures.

As part of exploratory analyses, we will aim to identify risk groups that are potentially incompletely captured with the measured exposure variables. We will perform unsupervised group-based multi-trajectory modeling of multivariate longitudinal patient trajectories to confirm any associations we have found using more traditional approaches<sup>44</sup>.

All efforts will be made to collect complete data on all study participants. However, there will inevitably be missing data due to drop-outs and a variety of other reasons. All primary analyses will be performed using multiple imputation. For sensitivity analyses, we will use all-available-cases (AAC), direct likelihood and fully Bayesian models and, for GEE models, weighted GEE. If the number of missingness patterns is sufficiently small, we will also use pattern mixture models which can be used under the general missing-not-at-random setting but make additional identification assumptions.

## **PATIENT PUBLIC INVOLVEMENT**

The global burden of HIV associated CBD and CVD has tripled over the last two decades with the greatest impact in sub-Saharan Africa. CBD and CVD are a priority for patients in Malawi as HIV infection is endemic and the population are living for longer. Knowledge of this, informed our research question with the aim of understanding the mechanisms and thus

BMJ OPEN

1  
2  
3 direct targeted novel therapies to reduce this burden. Patients will be involved in the  
4 recruitment of the study, but not in the design. Patients and their advisors will be thanked  
5 for contributing to the study.  
6  
7  
8  
9  
10

## 11 **ETHICS AND DISSEMINATION**

12  
13  
14 Written informed consent will be obtained from all study participants, either written or  
15 witnessed verbal consent with thumbprint if the participant is non-literate. Study data will  
16 be maintained in an encrypted and password protected database to which only study staff  
17 will have access. Study participants who develop a clinical event will be managed, using the  
18 hospital guidelines, by our study clinician alongside the hospital doctor. Clinical data will be  
19 anonymized using unique identifying code. Study data will be kept for 10 years and then  
20 destroyed with a record, as recommended by good clinical practice guidelines. This protocol  
21 was approved by the ethics committees at University of Malawi College of Medicine  
22 (Protocol P02/16/1874) and the Liverpool School of Tropical Medicine (Protocol 16-014).  
23  
24  
25  
26  
27  
28  
29  
30  
31  
32  
33

## 34 **DISCUSSION**

35  
36 African regions continue to bear the brunt of HIV infection, in 2013, an estimated 8.5 million  
37 adults were receiving ART<sup>45</sup>. As the landscape evolves, this population will live longer with  
38 stable HIV infection but likely remain at an increased risk of CBD/CVD compared to HIV-  
39 uninfected individuals of a similar age and sex. This study will be the first to determine the  
40 extent to which HIV reactivation of herpesvirus infection and inflammation contribute to  
41 CBD/CVD risk in an adult African population starting ART. The results of this work could  
42 potentially open avenues for novel anti-inflammatory and anti-viral interventions for the  
43 primary prevention of CBD/CVD in HIV populations in Africa.  
44  
45  
46  
47  
48  
49  
50  
51  
52  
53

## 54 **ACKNOWLEDGMENTS**

55  
56 The authors would like to thank Agbor Ako and Maria Davy from Research and  
57 Development, GlaxoSmithKline and the NCD Africa Open Lab of GlaxoSmithKline review  
58 committee for providing valuable advice for this protocol. The authors would like to thank  
59  
60

1  
2  
3  
4  
5  
6  
7  
8  
9  
10  
11  
12  
13  
14  
15  
16  
17  
18  
19  
20  
21  
22  
23  
24  
25  
26  
27  
28  
29  
30  
31  
32  
33  
34  
35  
36  
37  
38  
39  
40  
41  
42  
43  
44  
45  
46  
47  
48  
49  
50  
51  
52  
53  
54  
55  
56  
57  
58  
59  
60

BMJ OPEN

BA, MC, LH, THC, JVO, NT for their contribution to the End Point Review Committee, RD and EJ for radiology training and quality control, EZS for providing an electrocardiogram platform and for his cardiology review, VK for input with the echocardiogram protocol, and TS, JM, KM, MN for their input in the advanced drafts of the manuscript. We also extend our gratitude to the INSIGHT network for sharing their clinical endpoint criteria. LB is supported by an NIHR Clinical Lecturer Fellowship. SP is supported by an MRC (UK) core funding MC\_UU\_12023/23.

### **AUTHORS' CONTRIBUTIONS**

LB and IP developed the first draft. HM, NN, KJ, CK, LA, JKT, SP, MH, JVO, RH had major input for the revision of the second draft. JH is the project manager for RHICCA with oversight from LB, IP, and HM. MH contributed to the statistical methods. LB, JKT, JVO contributed to the clinical training. SP chaired the End point Review Committee.

### **FUNDING STATEMENT**

Funding for this study was provided by the GlaxoSmithKline Africa Non-Communicable Disease Open Lab Grant (Project Number: 7964)

### **COMPETING INTERESTS**

SLP has academic grants from Sysmex Corporation, Gilead Sciences, and ViiV Healthcare. All other authors have no competing interest.

BMJ OPEN

## REFERENCES

1. Roth GA, Johnson C, Abajobir A, et al. Global, Regional, and National Burden of Cardiovascular Diseases for 10 Causes, 1990 to 2015. *J Am Coll Cardiol* 2017;70(1):1-25. doi: 10.1016/j.jacc.2017.04.052
2. Organization WH. Global Update on HIV Treatment 2013: Results, Impact and Opportunities. WHO Report. Kuala Lumpur, Malaysia, 2013.
3. Macro NSONal. Malawi Demographic and Health Survey 2010. Zomba, Malawi, and Calverton, Maryland, USA: NSO and ICF Macro, 2010.
4. Freiberg MS, Chang CC, Kuller LH, et al. HIV infection and the risk of acute myocardial infarction. *JAMA Intern Med* 2013;173(8):614-22. doi: 10.1001/jamainternmed.2013.3728  
1659742 [pii] [published Online First: 2013/03/06]
5. Currier JS, Lundgren JD, Carr A, et al. Epidemiological evidence for cardiovascular disease in HIV-infected patients and relationship to highly active antiretroviral therapy. *Circulation* 2008;118(2):e29-35. doi: 10.1161/CIRCULATIONAHA.107.189624 [published Online First: 2008/06/21]
6. Butt AA, Chang CC, Kuller L, et al. Risk of heart failure with human immunodeficiency virus in the absence of prior diagnosis of coronary heart disease. *Archives of internal medicine* 2011;171(8):737-43. doi: 10.1001/archinternmed.2011.151 [published Online First: 2011/04/27]
7. Benjamin LA, Corbett EL, Connor MD, et al. HIV, antiretroviral treatment, hypertension, and stroke in Malawian adults: A case-control study. *Neurology* 2016;86(4):324-33. doi: 10.1212/WNL.0000000000002278
8. Allain TJ, Kinley L, Tsidya B, et al. The spectrum of heart disease in adults in Malawi: A review of the literature with reference to the importance of echocardiography as a diagnostic modality. *Malawi Med J* 2016;28(2):61-65. [published Online First: 2016/11/30]
9. Soliman EZ, Juma H. Cardiac disease patterns in northern Malawi: epidemiologic transition perspective. *J Epidemiol* 2008;18(5):204-8. [published Online First: 2008/08/30]
10. Syed FF, Sani MU. Recent advances in HIV-associated cardiovascular diseases in Africa. *Heart* 2013;99(16):1146-53. doi: 10.1136/heartjnl-2012-303177 [published Online First: 2013/05/18]
11. Soliman EZ, Sharma S, Arasteh K, et al. Baseline cardiovascular risk in the INSIGHT Strategic Timing of AntiRetroviral Treatment (START) trial. *HIV Med* 2015;16 Suppl 1:46-54. doi: 10.1111/hiv.12233 [published Online First: 2015/02/26]
12. Benjamin LA, Allain TJ, Mzinganjira H, et al. The Role of Human Immunodeficiency Virus-Associated Vasculopathy in the Etiology of Stroke. *J Infect Dis* 2017;216(5):545-53. doi: 10.1093/infdis/jix340 [published Online First: 2017/09/22]
13. Benjamin LA, Bryer A, Lucas S, et al. Arterial ischemic stroke in HIV: Defining and classifying etiology for research studies. *Neurol Neuroimmunol Neuroinflamm* 2016;3(4):e254. doi: 10.1212/NXI.0000000000000254
14. Nakanjako D, Kiragga A, Ibrahim F, et al. Sub-optimal CD4 reconstitution despite viral suppression in an urban cohort on antiretroviral therapy (ART) in sub-Saharan Africa: frequency and clinical significance. *AIDS Res Ther* 2008;5:23. doi: 10.1186/1742-6405-5-23 [published Online First: 2008/10/30]
15. Pawelec G, Derhovanessian E. Role of CMV in immune senescence. *Virus Res* 2011;157(2):175-9. doi: 10.1016/j.virusres.2010.09.010 [published Online First: 2010/09/28]
16. Appay V, Sauce D. Immune activation and inflammation in HIV-1 infection: causes and consequences. *J Pathol* 2008;214(2):231-41. doi: 10.1002/path.2276 [published Online First: 2007/12/29]
17. Shaw AC, Joshi S, Greenwood H, et al. Aging of the innate immune system. *Curr Opin Immunol* 2010;22(4):507-13. doi: 10.1016/j.coi.2010.05.003 [published Online First: 2010/07/30]

## BMJ OPEN

18. Hearps AC, Angelovich TA, Jaworowski A, et al. HIV infection and aging of the innate immune system. *Sex Health* 2011;8(4):453-64. doi: 10.1071/SH11028 [published Online First: 2011/12/01]
19. Kovacs EJ, Palmer JL, Fortin CF, et al. Aging and innate immunity in the mouse: impact of intrinsic and extrinsic factors. *Trends Immunol* 2009;30(7):319-24. doi: 10.1016/j.it.2009.03.012 [published Online First: 2009/06/23]
20. Hansson GK. Inflammation, atherosclerosis, and coronary artery disease. *The New England journal of medicine* 2005;352(16):1685-95. doi: 10.1056/NEJMra043430 [published Online First: 2005/04/22]
21. Boekholdt SM, Stroes ES. The interleukin-6 pathway and atherosclerosis. *Lancet* 2012;379(9822):1176-8. doi: 10.1016/S0140-6736(12)60361-4 [published Online First: 2012/03/17]
22. Duprez DA, Neuhaus J, Kuller LH, et al. Inflammation, coagulation and cardiovascular disease in HIV-infected individuals. *PLoS one* 2012;7(9):e44454. doi: 10.1371/journal.pone.0044454 [published Online First: 2012/09/13]
23. Lundgren JD, Babiker AG, Gordin F, et al. Initiation of Antiretroviral Therapy in Early Asymptomatic HIV Infection. *N Engl J Med* 2015;373(9):795-807. doi: 10.1056/NEJMoa1506816 [published Online First: 2015/07/21]
24. Eggena MP, Barugahare B, Okello M, et al. T cell activation in HIV-seropositive Ugandans: differential associations with viral load, CD4+ T cell depletion, and coinfection. *The Journal of infectious diseases* 2005;191(5):694-701. doi: 10.1086/427516 [published Online First: 2005/02/03]
25. Mussini CL, P.; Cozzi-Lepri, A.; Lapadula, G.; Marchetti, G.; Nicastri, E.; Cingolani, A.; Lichtner, M.; Antinori, A.; Gori, A.; Monforte, A. CD4/CD8 ratio normalisation and non-AIDS-related events in individuals with HIV who achieve viral load suppression with antiretroviral therapy: an observational cohort study. *Lancet HIV* 2015;2:e98–e106.
26. Sereti I, Krebs SJ, Phanuphak N, et al. Persistent, Albeit Reduced, Chronic Inflammation in Persons Starting Antiretroviral Therapy in Acute HIV Infection. *Clin Infect Dis* 2017;64(2):124-31. doi: 10.1093/cid/ciw683 [published Online First: 2016/10/16]
27. Brunner S, Herndler-Brandstetter D, Weinberger B, et al. Persistent viral infections and immune aging. *Ageing Res Rev* 2011;10(3):362-9. doi: 10.1016/j.arr.2010.08.003 [published Online First: 2010/08/24]
28. Moss P. The emerging role of cytomegalovirus in driving immune senescence: a novel therapeutic opportunity for improving health in the elderly. *Curr Opin Immunol* 2010;22(4):529-34. doi: 10.1016/j.coi.2010.07.001 [published Online First: 2010/08/06]
29. Appay V, Rowland-Jones SL. Premature ageing of the immune system: the cause of AIDS? *Trends Immunol* 2002;23(12):580-5. [published Online First: 2002/12/05]
30. Schaftenaar E, Verjans GM, Getu S, et al. High seroprevalence of human herpesviruses in HIV-infected individuals attending primary healthcare facilities in rural South Africa. *PLoS one* 2014;9(6):e99243. doi: 10.1371/journal.pone.0099243 [published Online First: 2014/06/11]
31. Hunt PW, Martin JN, Sinclair E, et al. Valganciclovir reduces T cell activation in HIV-infected individuals with incomplete CD4+ T cell recovery on antiretroviral therapy. *J Infect Dis* 2011;203(10):1474-83. doi: 10.1093/infdis/jir060 [published Online First: 2011/04/20]
32. Corbett EL. Intensified HIV/TB prevention linking home-based HIV testing, including the option of selftesting, with HIV care. ISRCTN02004005. London: ISRCTN, 2012.
33. Roth GA, Huffman MD, Moran AE, et al. Global and regional patterns in cardiovascular mortality from 1990 to 2013. *Circulation* 2015;132(17):1667-78. doi: 10.1161/CIRCULATIONAHA.114.008720
34. Maple PA, Breuer J, Quinlivan M, et al. Comparison of a commercial Varicella Zoster glycoprotein IgG enzyme immunoassay with a reference time resolved fluorescence immunoassay (VZV TRFIA) for measuring VZV IgG in sera from pregnant women, sera sent for confirmatory

## BMJ OPEN

- 1  
2  
3 testing and pre and post vOka vaccination sera from healthcare workers. *J Clin Virol*  
4 2012;53(3):201-7. doi: 10.1016/j.jcv.2011.12.010 [published Online First: 2012/01/21]  
5  
6 35. Carlier P, Harika N, Bailly R, et al. Laboratory evaluation of the new Access (R) cytomegalovirus  
7 immunoglobulin IgM and IgG assays. *J Clin Virol* 2010;49(3):192-7. doi:  
8 10.1016/j.jcv.2010.07.024 [published Online First: 2010/08/31]  
9  
10 36. Laurent S, Cockcroft J, Van Bortel L, et al. Expert consensus document on arterial stiffness:  
11 methodological issues and clinical applications. *Eur Heart J* 2006;27(21):2588-605. doi:  
12 10.1093/eurheartj/ehl254 [published Online First: 2006/09/27]  
13  
14 37. Touboul PJ, Hennerici MG, Meairs S, et al. Mannheim carotid intima-media thickness and plaque  
15 consensus (2004-2006-2011). An update on behalf of the advisory board of the 3rd, 4th and  
16 5th watching the risk symposia, at the 13th, 15th and 20th European Stroke Conferences,  
17 Mannheim, Germany, 2004, Brussels, Belgium, 2006, and Hamburg, Germany, 2011.  
18 *Cerebrovasc Dis* 2012;34(4):290-6. doi: 10.1159/000343145  
19 000343145 [pii] [published Online First: 2012/11/07]  
20  
21 38. Serina P, Riley I, Stewart A, et al. Improving performance of the Tariff Method for assigning  
22 causes of death to verbal autopsies. *BMC Med* 2015;13:291. doi: 10.1186/s12916-015-0527-  
23 9 [published Online First: 2015/12/09]  
24  
25 39. Organization WH. Consolidated ARV guidelines 2013 [Available from:  
26 <http://www.who.int/hiv/pub/guidelines/arv2013/art/artmonitoring/en/index4.html>  
27 accessed 15 Oct 2015.  
28  
29 40. Misiri HE, Edriss A, Aalen OO, et al. Estimation of HIV incidence in Malawi from cross-sectional  
30 population-based sero-prevalence data. *Journal of the International AIDS Society*  
31 2012;15(1):14. doi: 10.1186/1758-2652-15-14 [published Online First: 2012/03/16]  
32  
33 41. MacPherson P, Houben RM, Glynn JR, et al. Pre-treatment loss to follow-up in tuberculosis  
34 patients in low- and lower-middle-income countries and high-burden countries: a systematic  
35 review and meta-analysis. *Bull World Health Organ* 2014;92(2):126-38. doi:  
36 10.2471/BLT.13.124800 [published Online First: 2014/03/14]  
37  
38 42. Walker R, Whiting D, Unwin N, et al. Stroke incidence in rural and urban Tanzania: a prospective,  
39 community-based study. *Lancet Neurol* 2010;9(8):786-92. doi: S1474-4422(10)70144-7 [pii]  
40 10.1016/S1474-4422(10)70144-7 [published Online First: 2010/07/09]  
41  
42 43. von Elm E, Altman DG, Egger M, et al. The Strengthening the Reporting of Observational Studies  
43 in Epidemiology (STROBE) Statement: guidelines for reporting observational studies.  
44 *International journal of surgery* 2014;12(12):1495-9. doi: 10.1016/j.ijsu.2014.07.013  
45 [published Online First: 2014/07/22]  
46  
47 44. Nagin DS, Jones BL, Passos VL, et al. Group-based multi-trajectory modeling. *Stat Methods Med*  
48 *Res* 2018;27(7):2015-23. doi: 10.1177/0962280216673085 [published Online First:  
49 2018/05/31]  
50  
51 45. Organization WH. Global Update on the Health Sector Response to HIV 2014. Geneva: World  
52 Health Organization, 2014.  
53  
54  
55  
56  
57  
58  
59  
60

BMJ OPEN

1  
2  
3  
4  
5 **Figure 1.** Hypothetical pathway of the interplay between chronic viruses, immune activation, systemic  
6 inflammation, endothelial activation, and vasculopathy.  
7  
8  
9

10  
11 **Figure 2.** Outline of study design for a 36-month cohort study  
12  
13  
14  
15  
16  
17  
18  
19  
20  
21  
22  
23  
24  
25  
26  
27  
28  
29  
30  
31  
32  
33  
34  
35  
36  
37  
38  
39  
40  
41  
42

peer review only



BMJ OPEN

**Table 1.** Laboratory tests and clinical procedures in ART patients and HIV-uninfected adults

|                                                                              | Study Time Points |          |           |           |           |           |           |
|------------------------------------------------------------------------------|-------------------|----------|-----------|-----------|-----------|-----------|-----------|
|                                                                              | Baseline          | 6 months | 12 months | 18 months | 24 months | 30 months | 36 months |
| <b>Clinical Procedures</b>                                                   |                   |          |           |           |           |           |           |
| PWV                                                                          | X                 | X        | X         | X         | X         | X         | X         |
| CIMT                                                                         | X                 |          |           |           | X         |           |           |
| ABPI                                                                         | X                 | X        | X         | X         | X         | X         | X         |
| Cardiac Echo ( <i>participant sub-set</i> )                                  | X                 |          |           |           | X         |           |           |
| ECG ( <i>participant sub-set</i> )                                           | X                 |          |           |           | X         |           |           |
| <b>Cardiometabolic markers</b>                                               |                   |          |           |           |           |           |           |
| Creatinine                                                                   | X                 |          |           |           | X         |           |           |
| Full Blood Count                                                             | X                 | X        |           |           |           |           |           |
| Cholesterol (LDL, HDL, Triglycerides)                                        | X                 |          |           |           | X         |           |           |
| Serum glucose/HBA1C                                                          | X                 |          |           |           | X         |           |           |
| <b>HIV Infection and Progression</b>                                         |                   |          |           |           |           |           |           |
| HIV viral load ( <i>HIV patients</i> )                                       | X                 | X        | X         |           |           |           |           |
| CD4 count ( <i>HIV patients</i> )                                            | X                 | X        | X         |           |           |           |           |
| HIV rapid test ( <i>controls</i> )                                           | X                 |          | X         |           | X         |           | X         |
| <b>Immune dysregulation</b>                                                  |                   |          |           |           |           |           |           |
| Soluble markers of systemic inflammation                                     | X                 | X        | X         |           |           |           |           |
| Soluble markers of endothelial activation                                    | X                 | X        | X         |           |           |           |           |
| CD8 and CD4 T-cell activation and senescence ( <i>participant subset</i> )   | X                 | X        | X         |           | X         |           | X         |
| Monocyte/ Macrophage activation and senescence ( <i>participant subset</i> ) | X                 | X        | X         |           | X         |           | X         |
| <b>Herpesviruses infection</b>                                               |                   |          |           |           |           |           |           |
| CMV IgG                                                                      | X                 | X        |           |           |           |           |           |
| VZV IgG                                                                      | X                 | X        |           |           |           |           |           |



| Type               | Definitions                                                                                                                                                                                                                                                                                                                                                                                                                                                                                                                                                                                                                                                                                                                                                                                                                                                                                                                                                                                                             |
|--------------------|-------------------------------------------------------------------------------------------------------------------------------------------------------------------------------------------------------------------------------------------------------------------------------------------------------------------------------------------------------------------------------------------------------------------------------------------------------------------------------------------------------------------------------------------------------------------------------------------------------------------------------------------------------------------------------------------------------------------------------------------------------------------------------------------------------------------------------------------------------------------------------------------------------------------------------------------------------------------------------------------------------------------------|
| Primary Endpoint   | Carotid intimal medial thickness (CIMT)<br><br><u>Progression</u> : total change in CIMT at 24 months from baseline                                                                                                                                                                                                                                                                                                                                                                                                                                                                                                                                                                                                                                                                                                                                                                                                                                                                                                     |
|                    | Pulse wave velocity (PWV)<br><br><u>Progression</u> : total change in PWV at 24 months from baseline                                                                                                                                                                                                                                                                                                                                                                                                                                                                                                                                                                                                                                                                                                                                                                                                                                                                                                                    |
| Secondary endpoint | Stroke<br><br><b>Confirmed (1+2) or 3 or 4 or 5:</b> <ol style="list-style-type: none"> <li>1. Acute onset with a clinically compatible course, including unequivocal objective findings of a localizing neurologic deficit</li> <li>2. CT or MRI compatible with a diagnosis of stroke and current neurologic signs and symptoms</li> <li>3. Stroke diagnosed as the cause of death at autopsy</li> <li>4. Compatible clinical history and positive lumbar puncture compatible with subarachnoid hemorrhage</li> <li>5. Death certificate or death note from medical record listing stroke as the cause of death</li> </ol>                                                                                                                                                                                                                                                                                                                                                                                            |
|                    | Myocardial Infarction [MI]<br><br><b>Confirmed: One of the following 5 criteria (adapted from 2007 Universal Definition of Myocardial Infarction): [1 + (2 or 3 or 6)] or 4 or 5</b> <ol style="list-style-type: none"> <li>1. Rise and/or fall of cardiac biomarkers (preferably troponin), with at least one value above the 99th percentile of upper reference limit (URL);</li> <li>2. The occurrence of a compatible clinical syndrome, including symptoms consistent with myocardial ischemia;</li> <li>3. ECG changes indicative of new ischemia (new ST-changes or new left bundle branch block [LBBB]), or development of pathological Q waves on the ECG;</li> <li>4. Sudden unexpected cardiac death involving cardiac arrest before biomarkers are obtained or before a time when biomarkers appear, along with (a) new ST-changes or new LBB, or (b) evidence of fresh thrombus on coronary angiography or at autopsy</li> <li>5. Pathologic findings of acute myocardial infarction (including</li> </ol> |

BMJ OPEN

|  |                                                  |                                                                                                                                                                                                                                                                                                                                                                                                                                                                                             |
|--|--------------------------------------------------|---------------------------------------------------------------------------------------------------------------------------------------------------------------------------------------------------------------------------------------------------------------------------------------------------------------------------------------------------------------------------------------------------------------------------------------------------------------------------------------------|
|  |                                                  | acute MI demonstrated as the cause of death on autopsy)<br>6. Development of a) evolving new Q waves, or b) evolving ST elevation, preferably based on at least 2 ECGs taken during the same hospital admission                                                                                                                                                                                                                                                                             |
|  | Coronary artery disease requiring drug treatment | <b>Confirmed (1 or 2) + 3:</b><br>1. Evidence of myocardial ischemia based on either diagnostic imaging (such as a stress echocardiogram or thallium scan) or diagnostic changes on an electrocardiogram (such as during stress testing or an episode of chest pain)<br>2. Evidence of coronary artery disease based on coronary angiography or other diagnostic imaging<br>3. Use of medication given to treat or prevent angina (e.g., nitrates, beta blockers, calcium channel blockers) |
|  | Peripheral vascular disease [PVD]                | <b>Confirmed (1+2) or (1+3):</b><br>1. Compatible clinical signs and symptoms<br>2. Positive results on diagnostic imaging studies (e.g., Doppler ultrasound, contrast arteriography, MRI arteriography); 3. Ankle Brachial Pressure Index < 0.90 in non-diabetics                                                                                                                                                                                                                          |
|  | Vascular Immune reconstitution syndrome (IRIS)   | A new onset vasculopathy within 6 months of starting ART                                                                                                                                                                                                                                                                                                                                                                                                                                    |
|  | All-cause death and vascular-related deaths      | Death (of any or vascular cause) that occurs after recruitment into the study                                                                                                                                                                                                                                                                                                                                                                                                               |

1  
2  
3  
4  
5  
6  
7  
8  
9  
10  
11  
12  
13  
14  
15  
16  
17  
18  
19  
20  
21  
22  
23  
24  
25  
26  
27  
28  
29  
30  
31  
32  
33  
34  
35  
36  
37  
38  
39  
40  
41  
42  
43  
44  
45  
46

BMJ OPEN

1  
2  
3  
4  
5  
6  
7  
8  
9  
10  
11  
12  
13  
14  
15  
16  
17  
18  
19  
20  
21  
22  
23  
24  
25  
26  
27  
28  
29  
30  
31  
32  
33  
34  
35  
36  
37  
38  
39  
40  
41  
42  
43  
44  
45  
46

For peer review only

1  
2  
3  
4  
5  
6  
7  
8  
9  
10  
11  
12  
13  
14  
15  
16  
17  
18  
19  
20  
21  
22  
23  
24  
25  
26  
27  
28  
29  
30  
31  
32  
33  
34  
35  
36  
37  
38  
39  
40  
41  
42  
43  
44  
45  
46  
47  
48  
49  
50  
51  
52  
53  
54  
55  
56  
57  
58  
59  
60

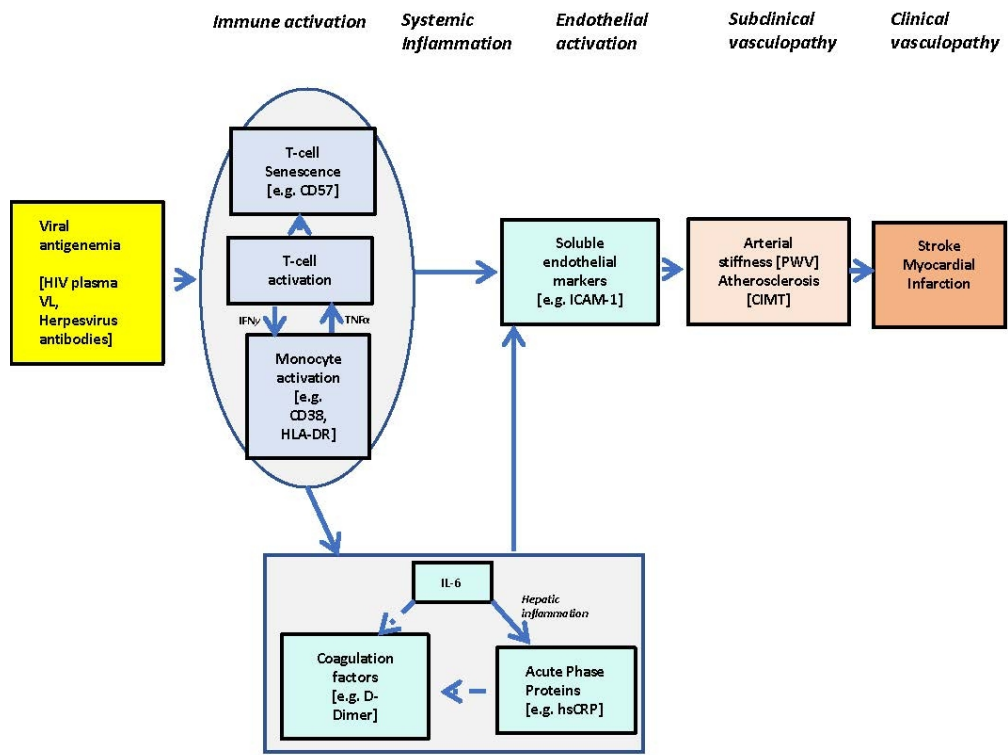

Figure 1

90x90mm (300 x 300 DPI)

1  
2  
3  
4  
5  
6  
7  
8  
9  
10  
11  
12  
13  
14  
15  
16  
17  
18  
19  
20  
21  
22  
23  
24  
25  
26  
27  
28  
29  
30  
31  
32  
33  
34  
35  
36  
37  
38  
39  
40  
41  
42  
43  
44  
45  
46  
47  
48  
49  
50  
51  
52  
53  
54  
55  
56  
57  
58  
59  
60

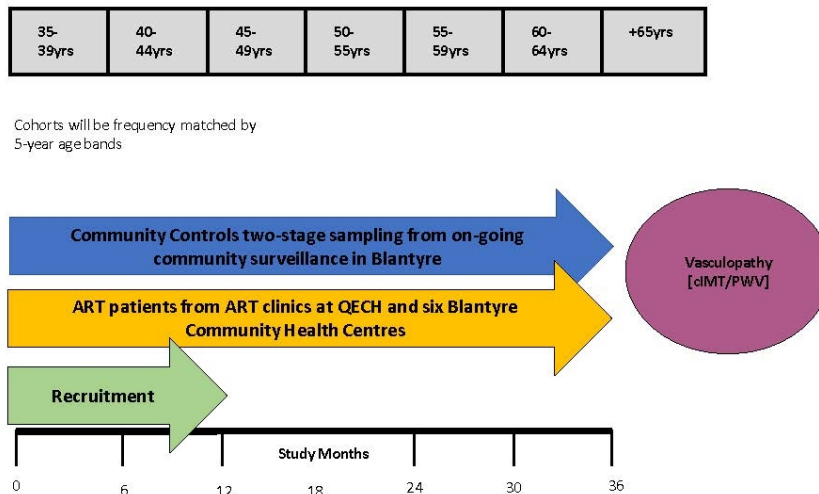

Figure 2

90x90mm (300 x 300 DPI)

# RHICCA – Clinical endpoint diagnostic criteria vs 3.5 Apr 2018



|                                           | CONFIRMED                                                                                                                                                                                                                                                                                                    | PROBABLE                                                                                                                                                                                                                                                                                                       |
|-------------------------------------------|--------------------------------------------------------------------------------------------------------------------------------------------------------------------------------------------------------------------------------------------------------------------------------------------------------------|----------------------------------------------------------------------------------------------------------------------------------------------------------------------------------------------------------------------------------------------------------------------------------------------------------------|
| <b>INFECTIONS</b>                         |                                                                                                                                                                                                                                                                                                              |                                                                                                                                                                                                                                                                                                                |
| Aspergillosis, invasive pulmonary         | <b>Confirmed: 1 + 2 + 3:</b><br>1. Compatible clinical course ( <b>Appendix 13</b> ),<br>2. CXR abnormality compatible with aspergillosis;<br>3. invasive mycelia consistent with Aspergillus on lung biopsy or positive culture of lung tissue or <b>positive culture of sputum</b> collected by any method | <b>Probable: 1 + 2 + 3:</b><br>1. Compatible clinical course ( <b>Appendix 13</b> ),<br>2. CXR abnormality compatible with aspergillosis;<br>3. invasive mycelia consistent with Aspergillus on tissue biopsy or positive culture at a normally sterile site (e.g., blood) apart from the lungs.               |
| Aspergillosis, other invasive             | <b>Confirmed: 1 + 2 + 3:</b><br>1. compatible clinical course ( <b>Appendix 11</b> ),<br>2. invasive mycelia consistent with Aspergillus on tissue biopsy or clinical evidence of infection,<br>3. positive culture from the affected tissue                                                                 | <b>Probable: 1 + 2:</b><br>1. clinical evidence of invasive infection ( <b>Appendix 11</b> ), 2. invasive mycelia consistent with Aspergillus on tissue biopsy or positive culture at a normally sterile site (e.g., blood) apart from the involved tissue                                                     |
| Bartonellosis                             | <b>Confirmed 1+ 2:</b><br>1. Clinical or histologic evidence of bacillary angiomatosis or bacillary peliosis,<br>2. a positive culture or PCR for <i>B. quintana</i> or <i>B. henselae</i>                                                                                                                   | <b>Probable 1 + 2:</b><br>1. Clinical evidence of bacillary angiomatosis or bacillary peliosis ( <b>Appendix 12</b> ),<br>2. positive silver stain for bacilli from a skin lesion or an affected organ                                                                                                         |
| Candidiasis, oral                         | <b>Confirmed: 1 + 2 + 3:</b><br>1. Macroscopic appearance on examination of the mouth<br>2. microscopic evidence of yeasts or pseudo hyphae<br>3. no evidence of oesophageal involvement                                                                                                                     | <b>Probable: 1 + 2 + 3:</b><br>1. a clinical diagnosis of oral candidiasis and/or microscopic evidence of yeasts or pseudo hyphae<br>2. clinical response to treatment<br>3. no evidence of oesophageal involvement                                                                                            |
| Candidiasis of bronchi, trachea, or lungs | <b>Confirmed: 1 + 2:</b><br>Macroscopic appearance at bronchoscopy or autopsy<br>microscopic evidence of yeasts or pseudo hyphae                                                                                                                                                                             | <b>None</b>                                                                                                                                                                                                                                                                                                    |
| Candidiasis, esophageal                   | <b>Confirmed: 1 + 2:</b><br>1. Macroscopic appearance at esophagoscopy or autopsy.<br>2. microscopic evidence of yeasts or pseudo hyphae                                                                                                                                                                     | <b>Probable: 1 + 2 + 3:</b><br>1. Recent onset of retrosternal pain or difficulty on swallowing.<br>2. a clinical diagnosis of oral candidiasis, endoscopic visualization of candidiasis and/or microscopic evidence of yeasts or pseudo hyphae from oropharyngeal mucosa<br>3. clinical response to treatment |

# RHICCA – Clinical endpoint diagnostic criteria vs 3.5 Apr 2018



|                                                 | CONFIRMED                                                                                                                                                                                                                                           | PROBABLE                                                                                                                                                                                                                  |
|-------------------------------------------------|-----------------------------------------------------------------------------------------------------------------------------------------------------------------------------------------------------------------------------------------------------|---------------------------------------------------------------------------------------------------------------------------------------------------------------------------------------------------------------------------|
| <b>INFECTIONS (CONTINUED)</b>                   |                                                                                                                                                                                                                                                     |                                                                                                                                                                                                                           |
| Cryptococcosis, extrapulmonary (not meningitis) | <b>Confirmed: 1 or 2 or 3:</b><br><br>From tissue other than lung or hilum:<br>1. microscopic demonstration of narrow based budding yeast<br>2. positive culture,<br>3. antigen detection                                                           | None                                                                                                                                                                                                                      |
| Cryptococcosis meningitis                       | <b>Confirmed: 1 or 2 or 3 or 4:</b><br>1. Brain histopathology microscopic demonstration of narrow based budding yeast<br>2. CSF evidence of India ink test<br>3. CSF evidence of positive culture<br>4. CSF evidence of positive antigen detection | None                                                                                                                                                                                                                      |
| Cryptosporidiosis                               | <b>Confirmed: 1 + 2</b><br>1. Diarrhea for > 1 month<br>2. positive microscopy                                                                                                                                                                      | None                                                                                                                                                                                                                      |
| CMV retinitis                                   | Autopsy demonstration                                                                                                                                                                                                                               | <b>Probable 1 + 2:</b><br>1. Typical appearance on fundoscopy of discrete patches of retinal whitening, spreading along blood vessels.<br>2. Associated vasculitis, hemorrhage and necrosis, confirmed by ophthalmologist |

|                                                | CONFIRMED                                                                                                                                                                                                                                                                                 | PROBABLE                                                                                                                                                                                                                                      |
|------------------------------------------------|-------------------------------------------------------------------------------------------------------------------------------------------------------------------------------------------------------------------------------------------------------------------------------------------|-----------------------------------------------------------------------------------------------------------------------------------------------------------------------------------------------------------------------------------------------|
| <b>INFECTIONS (CONTINUED)</b>                  |                                                                                                                                                                                                                                                                                           |                                                                                                                                                                                                                                               |
| HZV single dermatome                           | <b>Confirmed 1+2:</b><br>1. multiple ulcerated lesions affecting at least 1 dermatome, and/or 1 or more contiguous dermatomes;<br><br>2. positive culture, PCR, or antigen assay from affected tissue                                                                                     | <b>Probable 1 + 2:</b><br>1. multiple typical ulcerated lesions affecting at Least 1 dermatome, and/or 1 or more contiguous dermatomes;<br><br>2. response to an antiviral active against HZV unless resistance is demonstrated               |
| HZV, disseminated                              | <b>Confirmed 1+2:</b><br>1. multiple ulcerated lesions affecting at least 2 non-contiguous dermatomes, or with generalized cutaneous dissemination HZV involvement of the lung, liver, brain, or other internal organs<br>2. positive culture, PCR, or antigen assay from affected tissue | <b>Probable 1+2:</b><br>1. multiple typical ulcerated lesions affecting at least 2 non-contiguous dermatomes, or with generalized cutaneous dissemination<br>2. response to an antiviral active against HZV unless resistance is demonstrated |
| HSV mucocutaneous ulceration                   | <b>Confirmed 1 +2:</b><br>1. Ulceration for > 1 Month<br>2. Histology, culture, PCR, or detection of antigen from affected tissue                                                                                                                                                         | <b>Probable 1 + 2:</b><br>1. Typical HSV ulceration for > 1 month,<br>2. response to an antiviral active against HZV unless resistance is demonstrated                                                                                        |
| Histoplasmosis, disseminated or extrapulmonary | <b>Confirmed 1+2:</b><br>1. Compatible symptoms,<br>2. histology or culture or elevated blood or urine antigen levels                                                                                                                                                                     | None                                                                                                                                                                                                                                          |
| Isosporiasis                                   | <b>Confirmed 1 + 2:</b><br>1. Diarrhea for > 1 month<br>2. microscopic identification of <i>Isospora belli</i>                                                                                                                                                                            | None                                                                                                                                                                                                                                          |

## RHICCA – Clinical endpoint diagnostic criteria vs 3.5 Apr 2018



|                                                   |                                                                                                                                                                |                                                                                                                                                                                                                       |
|---------------------------------------------------|----------------------------------------------------------------------------------------------------------------------------------------------------------------|-----------------------------------------------------------------------------------------------------------------------------------------------------------------------------------------------------------------------|
| Microsporidiosis                                  | <b>Confirmed 1 + 2:</b><br>1.Diarrhea for > 1 month<br>2.Microscopic identification of Microsporidia                                                           | None                                                                                                                                                                                                                  |
| MAC and other mycobacterial disseminated diseases | <b>Confirmed 1 + 2:</b><br>1. Fever, fatigue, anemia or diarrhea<br>2. positive culture from blood, body fluids or tissue other than pulmonary, hilar or stool | <b>Probable 1+2+3:</b><br>1. Fever, fatigue, anemia or diarrhea<br>2. <b>AFB</b> or positive direct MAC PCR in blood, body fluids or tissue other than pulmonary, hilar or stool<br>3. no concurrent non-pulmonary TB |

|                                                                 | <b>CONFIRMED</b>                                                                                                                                                            | <b>PROBABLE</b>                                                                                                                                                                                                                               | <b>POSSIBLE</b>                                                                                                                                                                                                                                                                                                      |
|-----------------------------------------------------------------|-----------------------------------------------------------------------------------------------------------------------------------------------------------------------------|-----------------------------------------------------------------------------------------------------------------------------------------------------------------------------------------------------------------------------------------------|----------------------------------------------------------------------------------------------------------------------------------------------------------------------------------------------------------------------------------------------------------------------------------------------------------------------|
| <i>M. tuberculosis</i> disease, pulmonary                       | <b>Confirmed 1+2:</b><br>1. Compatible symptoms of fever, dyspnea, cough, weight loss or fatigue<br>2. culture or PCR from <b>sputum</b> or bronchial lavage or lung tissue | <b>Probable 1+2+3+4:</b><br>1. Symptoms of fever, dyspnea, cough, weight loss or fatigue<br>2. abnormal chest X-ray,<br>3. AFBs seen in sputum or lavage or lung tissue but not grown in culture,<br>4. responds to treatment                 | <b>Possible 1+2+3+4:</b><br>1. Symptoms of fever, dyspnea, cough, weight loss or fatigue<br>2. abnormal chest X-ray compatible with pulmonary TB (such as upper lobe cavitation, pleural exudate)<br>3. No other etiology for pulmonary symptoms and signs identified,<br>4. Responds to anti tuberculosis treatment |
| <i>M. tuberculosis</i> disease, Extrapulmonary (not meningitis) | <b>Confirmed 1+2:</b><br>1. Compatible symptoms<br>2. culture or PCR or MTB Xpert from blood or affected tissue (i.e. pericardial, ascites, and lymph glands)               | <b>Probable 1+2+3:</b><br>1. Compatible symptoms<br>2. AFBs seen from affected tissue or blood<br>3. concurrent diagnosis of pulmonary TB or responds to treatment                                                                            | <b>Possible 1+2+3:</b><br>1. Compatible symptoms<br>2. No other etiology for symptoms and signs identified<br>3. concurrent diagnosis of pulmonary TB or responds to treatment                                                                                                                                       |
| <i>M. tuberculosis</i> disease, meningitis                      | <b>Confirmed 1+2:</b><br>1. Clinical symptoms of meningism ( <b>Appendix 7</b> )<br>2. Tissue/CSF culture, or PCR, or AFB or MTB Xpert                                      | <b>Probable 1+ a score <math>\geq 12</math> (Appendix: Table 2):</b><br>1. Clinical symptoms of meningism ( <b>Appendix 7</b> )<br>2. A score $\geq 12$ , based on clinical, CSF, cerebral brain imaging criteria or evidence of TB elsewhere |                                                                                                                                                                                                                                                                                                                      |
| Nocardiosis                                                     | <b>Confirmed 1+2:</b><br>1. Clinical evidence of invasive Infection ( <b>Appendix 8</b> )<br>2. a positive culture from the affected tissue or blood                        | <b>Probable 1+2:</b><br>1. Clinical evidence of invasive Infection ( <b>Appendix 8</b> )<br>2. microscopic evidence of bronchial weakly acid fast organisms from the affected tissue                                                          |                                                                                                                                                                                                                                                                                                                      |



## RHICCA – Clinical endpoint diagnostic criteria vs 3.5 Apr 2018

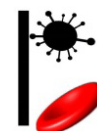
**RHICCA**

Reactivation of herpesviruses and inflammation as cardiovascular and cerebrovascular risk factors in ART initiators

|                                                |                                                                                                                                                                                                                                  |                                                                                                                                                                                                                                                                                                                                                                                                                                                                                    |
|------------------------------------------------|----------------------------------------------------------------------------------------------------------------------------------------------------------------------------------------------------------------------------------|------------------------------------------------------------------------------------------------------------------------------------------------------------------------------------------------------------------------------------------------------------------------------------------------------------------------------------------------------------------------------------------------------------------------------------------------------------------------------------|
| <i>Pneumocystis jirovecii</i> pulmonary        | <b>Confirmed 1+2:</b> <ol style="list-style-type: none"> <li>compatible clinical syndrome (<b>Appendix 9</b>)</li> <li>microscopic or histological demonstration of <i>P. jirovecii</i> cysts in a pulmonary specimen</li> </ol> | <b>Probable 1+2+3+4+5</b> <ol style="list-style-type: none"> <li>dyspnea or cough, or fever progressive over &gt; 1 week</li> <li><b>diffuse chest x-ray abnormality</b> or, if on inhalational pentamidine, diffuse upper lung field abnormality</li> <li>evidence of hypoxia</li> <li>not suggestive of bacterial pneumonia (i.e., not purulent sputum or hemoptysis, no bacterial pathogen identified in blood or bronchial wash)</li> <li>response to PcJ treatment</li> </ol> |
| <i>Pneumocystis jirovecii</i> , extrapulmonary | <b>Confirmed 1+2:</b> <ol style="list-style-type: none"> <li>compatible clinical syndrome</li> <li>microscopic or histological demonstration of <i>P. jirovecii</i> cysts in a tissue other than pulmonary specimen</li> </ol>   | None                                                                                                                                                                                                                                                                                                                                                                                                                                                                               |

## RHICCA – Clinical endpoint diagnostic criteria vs 3.5 Apr 2018

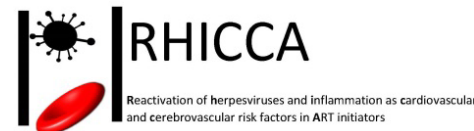

|                                                                                                                                                                                                                                                                                                  | CONFIRMED                                                                                                                                                                                                                                                                                                                                                                                                                                                                                                                                                                                                                                                                                                                                                                                                                                                                                                                                                                                | PROBABLE                                                                                                                                                                                                                                                                                                                                                                                                                                                                                                                                                                                                                                                                                                                                          |
|--------------------------------------------------------------------------------------------------------------------------------------------------------------------------------------------------------------------------------------------------------------------------------------------------|------------------------------------------------------------------------------------------------------------------------------------------------------------------------------------------------------------------------------------------------------------------------------------------------------------------------------------------------------------------------------------------------------------------------------------------------------------------------------------------------------------------------------------------------------------------------------------------------------------------------------------------------------------------------------------------------------------------------------------------------------------------------------------------------------------------------------------------------------------------------------------------------------------------------------------------------------------------------------------------|---------------------------------------------------------------------------------------------------------------------------------------------------------------------------------------------------------------------------------------------------------------------------------------------------------------------------------------------------------------------------------------------------------------------------------------------------------------------------------------------------------------------------------------------------------------------------------------------------------------------------------------------------------------------------------------------------------------------------------------------------|
| <b>INFECTIONS (CONTINUED)</b>                                                                                                                                                                                                                                                                    |                                                                                                                                                                                                                                                                                                                                                                                                                                                                                                                                                                                                                                                                                                                                                                                                                                                                                                                                                                                          |                                                                                                                                                                                                                                                                                                                                                                                                                                                                                                                                                                                                                                                                                                                                                   |
| Pneumonia, <b>SINGLE EPISODE (isolated)</b><br>bacterial, excludes: (a) post-obstructive pneumonias, including in those with intrapulmonary/bronchial lesions, (b) aspiration pneumonia, including in those with decreased consciousness levels, (c) nosocomial ventilator-associated pneumonias | <b>Confirmed 1+2+3:</b><br>pneumonia episodes must occur after enrollment;<br><ol style="list-style-type: none"> <li>Signs and symptoms suggestive of bacterial pneumonia (<b>appendix 10</b>)</li> <li>Focal CXR abnormality compatible with bacterial pneumonia,</li> <li>identification of a bacterial pathogen by positive blood culture, positive bronchoscopic sputum culture, detection of Legionella or pneumococcal antigen in urine or blood or diagnostic serologic findings</li> </ol>                                                                                                                                                                                                                                                                                                                                                                                                                                                                                       | <b>Probable 1+2:</b><br>pneumonia episodes must occur after enrollment;<br><ol style="list-style-type: none"> <li>Signs and symptoms suggestive of bacterial pneumonia (<b>Appendix 10</b>)</li> <li>Focal CXR abnormality compatible with Bacterial pneumonia</li> </ol>                                                                                                                                                                                                                                                                                                                                                                                                                                                                         |
| Pneumonia, <b>recurrent</b><br>bacterial, excludes: (a) post-obstructive pneumonias, including in those with intrapulmonary/bronchial lesions, (b) aspiration pneumonia, including in those with decreased consciousness levels, (c) nosocomial ventilator-associated pneumonias                 | <b>Confirmed 1+2+3+4+5</b><br>Second pneumonia episodes must occur after enrollment and after an isolated pneumonia, within 365 days of the first episode and with strong clinical evidence that the first episode was cured;<br><ol style="list-style-type: none"> <li>Signs and symptoms of second event suggestive of bacterial pneumonia (<b>Appendix 10</b>)</li> <li>Focal CXR abnormality compatible with bacterial pneumonia,</li> <li>identification of a bacterial pathogen by positive blood culture, positive bronchoscopic sputum culture, detection of Legionella or pneumococcal antigen in urine or blood or diagnostic serologic findings</li> <li>the second pneumonia had onset of symptoms &lt; 365 days after the first episode</li> <li>there is strong evidence that the first episode was cured such as an intervening clear CXR or absence of symptoms after &gt; 1 month off antibacterial effective against pathogens commonly producing pneumonia</li> </ol> | <b>Probable 1+2+3+4:</b><br>Second pneumonia episodes must occur after enrollment and after an isolated pneumonia, within 365 days of the first episode and with strong clinical evidence that the first episode was cured;<br><ol style="list-style-type: none"> <li>Signs and symptoms suggestive of bacterial pneumonia (<b>Appendix 10</b>)</li> <li>focal CXR abnormality compatible with bacterial pneumonia</li> <li>the second pneumonia had onset of symptoms &lt; 365 days after the first episode</li> <li>there is strong evidence that the first episode was cured such as an intervening clear CXR or absence of symptoms after &gt; 1 month off antibacterials effective against pathogens commonly producing pneumonia</li> </ol> |
| PML (progressive multifocal leukoencephalopathy)                                                                                                                                                                                                                                                 | <b>Confirmed 1 or 2:</b><br><ol style="list-style-type: none"> <li>positive histology,</li> <li>compatible clinical (<b>Appendix 11</b>) and radiologic course and positive CSF PCR for JK virus</li> </ol>                                                                                                                                                                                                                                                                                                                                                                                                                                                                                                                                                                                                                                                                                                                                                                              | <b>Probable 1+2+3:</b><br><ol style="list-style-type: none"> <li>Consistent symptoms (<b>Appendix 11</b>),</li> <li>brain image consistent with PML,</li> <li>no response to toxo treatment or toxoplasma</li> </ol>                                                                                                                                                                                                                                                                                                                                                                                                                                                                                                                              |
| Salmonella blood stream infection or bacteraemia, isolated                                                                                                                                                                                                                                       | <b>Confirmed 1:</b><br>A septic episode must occur after enrollment;<br><ol style="list-style-type: none"> <li>Positive blood or tissue culture</li> </ol>                                                                                                                                                                                                                                                                                                                                                                                                                                                                                                                                                                                                                                                                                                                                                                                                                               | None                                                                                                                                                                                                                                                                                                                                                                                                                                                                                                                                                                                                                                                                                                                                              |
| Salmonella blood stream infection or bacteraemia, recurrent                                                                                                                                                                                                                                      | <b>Confirmed 1:</b><br>A second septic episode must occur after enrollment and after an isolated episode;<br><ol style="list-style-type: none"> <li>Has met the criteria of isolated Salmonella septicemia</li> <li>Positive blood or tissue culture on the second episode</li> <li>the second septicemia had onset of symptoms &lt; 365 days after the first episode</li> <li>the second septicemia must be due to a different Salmonella serotype or there must be strong evidence that the first episode was cured such as a negative blood culture off effective antibacterials for &gt; 1 week or absence of symptoms off antibacterials for &gt; 1 month</li> </ol>                                                                                                                                                                                                                                                                                                                | None                                                                                                                                                                                                                                                                                                                                                                                                                                                                                                                                                                                                                                                                                                                                              |

# RHICCA – Clinical endpoint diagnostic criteria vs 3.5 Apr 2018

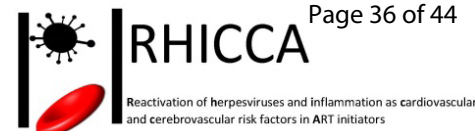

|                        |                                                                                                                                                                                                                        |                                                                                                                                                                                                                                                              |
|------------------------|------------------------------------------------------------------------------------------------------------------------------------------------------------------------------------------------------------------------|--------------------------------------------------------------------------------------------------------------------------------------------------------------------------------------------------------------------------------------------------------------|
| Toxoplasmosis of brain | <b>Confirmed 1+2+3:</b><br>1. Compatible clinical findings ( <b>Appendix 12</b> )<br>2. Compatible radiological findings<br>3. Detection of T gondii in the <b>CSF</b> or <b>brain tissue</b> (i.e. microscopy or PCR) | <b>Probable 1+2+3:</b><br>1. Symptoms of focal intracranial abnormality or decreased consciousness<br>2. brain image consistent with lesion(s) enhanced by contrast<br>3. <b>positive toxoplasma serology</b> or responds to treatment clinically or by scan |
|------------------------|------------------------------------------------------------------------------------------------------------------------------------------------------------------------------------------------------------------------|--------------------------------------------------------------------------------------------------------------------------------------------------------------------------------------------------------------------------------------------------------------|

|                                                              | CONFIRMED                                                   | PROBABLE                                                                                                                                                                                                                                                                                                                                                                                                                                                                        |
|--------------------------------------------------------------|-------------------------------------------------------------|---------------------------------------------------------------------------------------------------------------------------------------------------------------------------------------------------------------------------------------------------------------------------------------------------------------------------------------------------------------------------------------------------------------------------------------------------------------------------------|
| <b>NEOPLASMS</b>                                             |                                                             |                                                                                                                                                                                                                                                                                                                                                                                                                                                                                 |
| Cervical carcinoma, invasive                                 | <b>Confirmed 1:</b><br>1. Histology (NOT carcinoma-in-situ) | None                                                                                                                                                                                                                                                                                                                                                                                                                                                                            |
| Kaposi sarcoma, (mucocutaneous or visceral)                  | <b>Confirmed 1:</b><br>1. Histology                         | 1. Highly typical appearance<br>2. persistence for > 1 month                                                                                                                                                                                                                                                                                                                                                                                                                    |
| Lymphoma, primary, of brain                                  | <b>Confirmed 1:</b><br>1. Histology of brain tissue         | <b>Probable 1+2+3:</b><br>1. Symptoms consistent with lymphoma<br>2. at least one CNS lesion with mass effect<br>3. lack of clinical or radiographic response at least 2 weeks of treatment for toxoplasmosis                                                                                                                                                                                                                                                                   |
| Lymphoma, Hodgkin's                                          | 1. Histology                                                | None                                                                                                                                                                                                                                                                                                                                                                                                                                                                            |
| Lymphoma, non-Hodgkin's, all cell types                      | <b>Confirmed 1:</b><br>1. Histology                         | None                                                                                                                                                                                                                                                                                                                                                                                                                                                                            |
| <b>NEUROLOGICAL</b>                                          |                                                             |                                                                                                                                                                                                                                                                                                                                                                                                                                                                                 |
| HIV-related encephalopathy (including AIDS Dementia Complex) | None                                                        | <b>Probable 1+2+3+4:</b><br>1. Cognitive or motor dysfunction interfering with usual activity, progressive over weeks or months<br>2. no other condition to explain the findings<br>3. brain image obtained and suggests no other causes<br>4. grade 2 or worse impairment in at least 2 domains by NARS ( <b>appendix – table 1</b> ) excluding abnormal domains at trial entry. (For persons with abnormal domains at entry worsening by at least two grades meets criteria.) |

# RHICCA – Clinical endpoint diagnostic criteria vs 3.5 Apr 2018



| CARDIOVASCULAR DISEASES     |                                                                                                                                                                                                                                                                                                                                                                                                                                                                                                                                                                                                                                                                                                                                                                                                                                                                                                                                                                                                                                                                                                                                                                                                                                                         |                                                                                                                                                                                                                                                                                                                                                                                                                             |
|-----------------------------|---------------------------------------------------------------------------------------------------------------------------------------------------------------------------------------------------------------------------------------------------------------------------------------------------------------------------------------------------------------------------------------------------------------------------------------------------------------------------------------------------------------------------------------------------------------------------------------------------------------------------------------------------------------------------------------------------------------------------------------------------------------------------------------------------------------------------------------------------------------------------------------------------------------------------------------------------------------------------------------------------------------------------------------------------------------------------------------------------------------------------------------------------------------------------------------------------------------------------------------------------------|-----------------------------------------------------------------------------------------------------------------------------------------------------------------------------------------------------------------------------------------------------------------------------------------------------------------------------------------------------------------------------------------------------------------------------|
| Acute Myocardial Infarction | <p><b>Confirmed: One of the following 5 criteria (adapted from 2007 Universal Definition of Myocardial Infarction): [1 + (2 or 3 or 6)] or 4 or 5</b></p> <ol style="list-style-type: none"> <li>1. Rise and/or fall of cardiac biomarkers (preferably troponin), with at least one value above 99th percentile of upper reference limit (URL);</li> <li>2. Occurrence of a compatible clinical syndrome, including symptoms (such as chest pain – <b>see Appendix 1</b>) consistent with myocardial ischemia;</li> <li>3. ECG changes indicative of new ischemia (new ST-changes or new left bundle branch block [LBBB]), or development of pathological Q waves on the ECG;</li> <li>4. Sudden unexpected cardiac death involving cardiac arrest before biomarkers are obtained or before a time when biomarkers appear, along with (a) new ST-changes or new LBB, or (b) evidence of fresh thrombus on coronary angiography or at autopsy</li> <li>5. Pathologic findings of acute myocardial infarction (including acute MI demonstrated as the cause of death on autopsy)</li> <li>6. Development of a) evolving new Q waves, or b) evolving ST elevation, preferably based on at least 2 ECGs taken during the same hospital admission</li> </ol> | <p><b>Probable 1 and 2:</b></p> <ol style="list-style-type: none"> <li>1. Occurrence of a compatible clinical syndrome (<b>Appendix 1</b>), including symptoms (such as chest pain) consistent with myocardial ischemia)</li> <li>2. Development of a) evolving new Q waves, or b) evolving ST elevation, preferably based on at least; ECGs taken during the same hospital admission.</li> </ol>                           |
| Peripheral vascular disease | <p><b>Confirmed (1+2) or (1+3):</b></p> <ol style="list-style-type: none"> <li>1. Compatible clinical signs and symptoms (<b>see Appendix 3</b>)</li> <li>2. Positive results on diagnostic imaging studies (e.g., Doppler ultrasound, contrast arteriography, MRI arteriography);</li> <li>3. Ankle Brachial Pressure Index &lt; 0.90 in non-diabetics</li> </ol>                                                                                                                                                                                                                                                                                                                                                                                                                                                                                                                                                                                                                                                                                                                                                                                                                                                                                      | <p><b>Probable 1:</b></p> <ol style="list-style-type: none"> <li>1. Compatible clinical signs and symptoms (<b>see Appendix 3</b>)</li> </ol>                                                                                                                                                                                                                                                                               |
| Stroke                      | <p><b>Confirmed (1+2) or 3 or 4 or 5:</b></p> <ol style="list-style-type: none"> <li>1. Acute onset with a clinically compatible course, including unequivocal objective findings of a localizing neurologic deficit (<b>appendix 4</b>);</li> <li>2. CT or MRI compatible with diagnosis of stroke and current neurologic signs and symptoms</li> <li>3. Stroke diagnosed as cause of death at autopsy</li> <li>4. Compatible clinical history and positive lumbar puncture compatible with subarachnoid hemorrhage</li> <li>5. Death certificate or death note from medical record listing stroke as cause of death</li> </ol>                                                                                                                                                                                                                                                                                                                                                                                                                                                                                                                                                                                                                        | <p><b>Probable (1+2) or (1+3):</b></p> <ol style="list-style-type: none"> <li>1. Acute onset with a clinically compatible course, including unequivocal objective findings of a localizing neurologic deficit (<b>appendix 4</b>);</li> <li>2. Positive lumbar puncture compatible with subarachnoid hemorrhage</li> <li>3. Death certificate or death note from medical record listing stroke as cause of death</li> </ol> |
| Congestive heart failure    | <p><b>Confirmed (1+2) or (1+3) or (1+4):</b></p> <ol style="list-style-type: none"> <li>1. Clinical signs and symptoms compatible with left or right sided heart failure [<b>Appendix 5</b>] without an alternative explanation</li> <li>2. Hemodynamic measurements, radionuclide ventriculography, echocardiogram, cardiac catheterization, or multiple gated acquisition scan showing a decreased ejection fraction of &lt; 45%</li> <li>3. Echocardiogram, cardiac catheterization or other studies showing evidence of increased left atrial pressure or right heart failure;</li> <li>4. Elevated levels of Brain Natriuretic Peptide (BNP) or NT-proBNP</li> </ol>                                                                                                                                                                                                                                                                                                                                                                                                                                                                                                                                                                               | <p><b>Probable 1+2+3:</b></p> <ol style="list-style-type: none"> <li>1. Clinical signs and symptoms compatible with left or right sided heart failure [<b>Appendix 5</b>] without an alternative explanation</li> <li>2. Chest x-ray or other imaging study showing evidence of congestive heart failure, including cardiac enlargement;</li> <li>3. Documentation of treatment for congestive heart failure</li> </ol>     |

# RHICCA – Clinical endpoint diagnostic criteria vs 3.5 Apr 2018

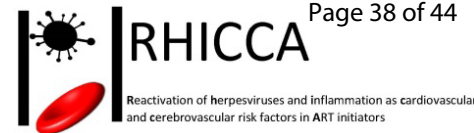

|                                                                                        |                                                                                                                                                                                                                                                                                                                                                                                                                                                                                                                                                                                                                                                                                                                                                                                                                           |                                                                                                                                                                                                                                                                                                                                                                                                                                                                                                                                                                                                  |
|----------------------------------------------------------------------------------------|---------------------------------------------------------------------------------------------------------------------------------------------------------------------------------------------------------------------------------------------------------------------------------------------------------------------------------------------------------------------------------------------------------------------------------------------------------------------------------------------------------------------------------------------------------------------------------------------------------------------------------------------------------------------------------------------------------------------------------------------------------------------------------------------------------------------------|--------------------------------------------------------------------------------------------------------------------------------------------------------------------------------------------------------------------------------------------------------------------------------------------------------------------------------------------------------------------------------------------------------------------------------------------------------------------------------------------------------------------------------------------------------------------------------------------------|
| <p>Coronary artery disease requiring drug treatment</p>                                | <p><b>Confirmed (1 or 2) + 3:</b></p> <ol style="list-style-type: none"> <li>Evidence of myocardial ischemia based on either diagnostic imaging (such as a <b>stress echocardiogram</b> or <b>thallium scan</b>) or diagnostic changes on an electrocardiogram (such as during stress testing or an episode of chest pain)</li> <li>Evidence of coronary artery disease based on <b>coronary angiography</b> or other diagnostic imaging</li> <li>Use of medication given to treat or prevent angina (e.g., nitrates, beta blockers, calcium channel blockers)</li> </ol>                                                                                                                                                                                                                                                 | <p><b>Probable 1+2:</b></p> <ol style="list-style-type: none"> <li>Other evidence of myocardial ischemia and/or coronary artery disease (including that based primarily upon symptoms and clinical presentation, such as chest pain with exertion)</li> <li>Use of medication given to treat or prevent angina (e.g., nitrates, beta blockers, calcium channel blockers)</li> </ol>                                                                                                                                                                                                              |
| <p>Deep vein thrombosis</p>                                                            | <p><b>Confirmed 1:</b></p> <ol style="list-style-type: none"> <li>Diagnosis of deep vein thrombosis (DVT) by contrast venography, or <b>ultrasonography</b> other comparable imaging techniques;</li> </ol>                                                                                                                                                                                                                                                                                                                                                                                                                                                                                                                                                                                                               | <p><b>Probable (1)+2+3:</b></p> <ol style="list-style-type: none"> <li>An <b>elevated D-dimer test</b>;</li> <li>A score on the Wells Clinical Prediction Rule for DVT of <math>\geq 3</math> points;</li> <li>Absence of alternative diagnosis as likely or greater than that of deep venous thrombosis.</li> </ol> <p><b>Wells Clinical Prediction Rule for DVT (Appendix 6)</b></p>                                                                                                                                                                                                           |
| <p><b>SYSTEMIC DISEASES</b></p>                                                        |                                                                                                                                                                                                                                                                                                                                                                                                                                                                                                                                                                                                                                                                                                                                                                                                                           |                                                                                                                                                                                                                                                                                                                                                                                                                                                                                                                                                                                                  |
| <p>Anaemia<br/>NOT FOR ERC<br/>TO BE DETERMINED<br/>RETROSPECTIVELY</p>                | <p><b>Confirmed 1</b><br/>Classified according to both WHO and DAIDS thresholds for severe/grade 3-4 anaemia</p>                                                                                                                                                                                                                                                                                                                                                                                                                                                                                                                                                                                                                                                                                                          |                                                                                                                                                                                                                                                                                                                                                                                                                                                                                                                                                                                                  |
| <p>Chronic Kidney disease</p>                                                          | <p><b>Confirmed: 1 or 2</b></p> <ol style="list-style-type: none"> <li>Kidney damage for &gt;3 months, as defined by structural or functional abnormalities of the kidney with or without decreased GRF, manifest by either;                     <ul style="list-style-type: none"> <li>Pathological abnormalities; or</li> <li>Markers of kidney damage, including abnormalities in the composition of the blood or urine or abnormalities in imaging results</li> </ul> </li> <li>GFR &lt;60mL/min/1.73m<sup>2</sup> for &gt;3months, with or without kidney disease (estimated by <b>CKD-EPI</b>)</li> </ol>                                                                                                                                                                                                           | <p><b>Confirmed: 1 or 2</b></p> <ol style="list-style-type: none"> <li>Isolated Kidney damage, as defined by structural or functional abnormalities of the kidney with or without decreased GRF, manifest by either;                     <ul style="list-style-type: none"> <li>Pathological abnormalities; or</li> <li>Markers of kidney damage, including abnormalities in the composition of the blood or urine or abnormalities in imaging results</li> </ul> </li> <li>Isolated GFR &lt;60mL/min/1.73m<sup>2</sup>, with or without kidney disease (estimated by <b>CKD-EPI</b>)</li> </ol> |
| <p>End-stage renal disease</p>                                                         | <p><b>Confirmed: 1</b></p> <ol style="list-style-type: none"> <li>Hemodialysis or peritoneal dialysis documented in a clinical note for a period of at least three months;</li> </ol>                                                                                                                                                                                                                                                                                                                                                                                                                                                                                                                                                                                                                                     | <p><b>Probable: 1</b></p> <ol style="list-style-type: none"> <li>Hemodialysis or peritoneal dialysis documented in a clinical note for a period of at least one month and up to the time of death in a patient who dies within three months after dialysis begins</li> </ol>                                                                                                                                                                                                                                                                                                                     |
| <p>Diabetes Mellitus<br/><br/>NOT FOR ERC<br/>TO BE DETERMINED<br/>RETROSPECTIVELY</p> | <p><b>Confirmed: 1 or 2 or 3 or 4</b></p> <ol style="list-style-type: none"> <li>Symptoms of diabetes plus casual plasma glucose concentration <math>\geq 200</math> mg/dL (11.1 mmol/L). (Casual is defined as any time of day without regard to time since last meal. The classic symptoms of diabetes include polyuria and polydipsia.)</li> <li>Fasting plasma glucose <math>\geq 126</math> mg/dL (7.0 mmol/L). (Fasting is defined as no caloric intake for at least 8 hours.)</li> <li>2-hour post-load glucose <math>\geq 200</math> mg/dL (11.1 mmol/L) during an oral glucose tolerance test. (The test should be performed as described by WHO, using glucose load containing the equivalent of 75 g anhydrous glucose dissolved in water.)</li> <li>An <b>HbA1c</b> of 48mmol/mol (6.5%) or above.</li> </ol> | <p><b>None</b></p>                                                                                                                                                                                                                                                                                                                                                                                                                                                                                                                                                                               |

## RHICCA – Clinical endpoint diagnostic criteria vs 3.5 Apr 2018



|                            |                                                                                                                                                                                                                                                                                                                                                                                                                                                                                                                                                                                                                                                                                                                                                                                                                                                                                                                                                   |                                                                                                                                                                                                                                                                                                                                                                                                                                                                    |
|----------------------------|---------------------------------------------------------------------------------------------------------------------------------------------------------------------------------------------------------------------------------------------------------------------------------------------------------------------------------------------------------------------------------------------------------------------------------------------------------------------------------------------------------------------------------------------------------------------------------------------------------------------------------------------------------------------------------------------------------------------------------------------------------------------------------------------------------------------------------------------------------------------------------------------------------------------------------------------------|--------------------------------------------------------------------------------------------------------------------------------------------------------------------------------------------------------------------------------------------------------------------------------------------------------------------------------------------------------------------------------------------------------------------------------------------------------------------|
| Decompensate Liver disease | <p><b>Confirmed: 1+2</b></p> <p>1. Histologic, radiographic, or ultrasound evidence of cirrhosis, as documented by one of the following:</p> <ul style="list-style-type: none"> <li>a. Histologic evidence of cirrhosis obtained by liver biopsy or autopsy</li> <li>b. MRI or CT consistent with cirrhosis</li> <li>c. A positive result on ultrasound imaging consistent with cirrhosis</li> </ul> <p>2. Clinical evidence of decompensation, as documented by one of the following, and without an alternative explanation:</p> <ul style="list-style-type: none"> <li>a. Ascites</li> <li>b. Hepatic encephalopathy</li> <li>c. Bleeding from gastric or esophageal varices</li> <li>d. Spontaneous bacterial peritonitis</li> </ul>                                                                                                                                                                                                          | <p><b>Probable: 1</b></p> <p>1. Clinical evidence of decompensation, as documented by one of the following, and without an alternative explanation:</p> <ul style="list-style-type: none"> <li>a. Ascites</li> <li>b. Hepatic encephalopathy</li> <li>c. Bleeding from gastric or esophageal varices</li> <li>d. Spontaneous bacterial peritonitis</li> </ul>                                                                                                      |
| Hypertension               | <p><b>Confirmed: 1 or 2</b></p> <p>1. An average of three blood pressure (BP) readings of systolic of 140 mm Hg or above and/or diastolic of 90 mm Hg or above on the same day and persist 5-7 days after the initial reading.</p> <p>2. An isolated reading of 140mg systolic or 90mg diastolic and presence of the following end-organ disease:</p> <ul style="list-style-type: none"> <li>a. Cardiac (i.e. left ventricular hypertrophy meeting the ECG criteria [<b>Appendix 2</b>] on evidence on cardiac echocardiogram)</li> <li>b. Renal (i.e. microalbuminuria [urinary albumin excretion of 30-300mg/dl], elevated creatinine, reduced estimated GFR (60-90ml/min)</li> <li>c. Retinal(i.e. hypertensive retinal changes)</li> <li>d. Vascular disease (i.e. stroke [persisting on day 7], peripheral vascular disease, myocardial infarction, coronary artery disease requiring drug treatment, congestive cardiac failure)</li> </ul> | <p><b>Probable: 1</b></p> <p>1. An average of three BP readings of systolic of 140 mm Hg or above and/or diastolic of 90 mm Hg or above on the same day.</p>                                                                                                                                                                                                                                                                                                       |
| Hyperlipidemia             | <p><b>Confirmed: 1 or 2</b></p> <ul style="list-style-type: none"> <li>1. Fasting total cholesterol &gt;200mg/dl (&gt;5.2 mmol/L) or LDL cholesterol &gt;130mg/dl (&gt;3.4mmol/l) or Triglycerides &gt;150 mg/dl (1.7 mmol/L)</li> <li>2. Non-fasting total cholesterol &gt;240mg/dl (&gt;6.2 mmol/L) or LDL cholesterol &gt;160mg/dl (&gt;4.1 mmol/L) or Triglycerides &gt;200 mg/dl (2.3mmol/L)</li> </ul>                                                                                                                                                                                                                                                                                                                                                                                                                                                                                                                                      | <p><b>None</b></p>                                                                                                                                                                                                                                                                                                                                                                                                                                                 |
| HIV wasting syndrome       | <p>None</p>                                                                                                                                                                                                                                                                                                                                                                                                                                                                                                                                                                                                                                                                                                                                                                                                                                                                                                                                       | <p><b>Probable: 1 + 2 + 3</b></p> <ul style="list-style-type: none"> <li>1. unexplained, involuntary weight loss &gt;10% from baseline,</li> <li>2. persistent diarrhea with &gt; 2 liquid stools/d for &gt; 1 month or weakness for &gt; 1 month or fever for &gt; 1 month,</li> <li>3. tests for alternate causes of weight loss, such as cancer, TB, MAC, cryptosporidiosis or other specific causes of weight loss, if obtained, should be negative</li> </ul> |





## RHICCA – Clinical endpoint diagnostic criteria vs 3.5 Apr 2018



4. Clinical syndrome of stroke; should meet the 3 criteria's;

|                                                                                                                                     |                                                                                                                                                                                                                                                                                                                                                                                                                                                                                                                                                                                                                                                                                                                                                                              |
|-------------------------------------------------------------------------------------------------------------------------------------|------------------------------------------------------------------------------------------------------------------------------------------------------------------------------------------------------------------------------------------------------------------------------------------------------------------------------------------------------------------------------------------------------------------------------------------------------------------------------------------------------------------------------------------------------------------------------------------------------------------------------------------------------------------------------------------------------------------------------------------------------------------------------|
| <b>1. Sudden onset</b>                                                                                                              |                                                                                                                                                                                                                                                                                                                                                                                                                                                                                                                                                                                                                                                                                                                                                                              |
| <b>2. Focal deficit</b> (or global disturbance but not seizures)                                                                    | <p><b>Large artery disease (anterior circulation syndrome)</b><br/>Hemi-paresis + Hemi-sensory loss + higher cortical dysfunction (gaze paresis, language impairment [expression + comprehension], visual field defect, hemi-neglect)</p> <p><b>Large artery disease (posterior circulation syndrome)</b><br/>Vertigo, visual field defect, gaze paresis, double vision, swallowing difficulty, crossed signs [contralateral limb weakness and ipsilateral cranial nerves abnormality], ataxic limb and gait, drowsy/loss of consciousness</p> <p><b>Small vessel disease (lacunar syndrome)</b><br/>Pure hemi-sensory loss<br/>Pure hemiparesis<br/>Pure sensorimotor<br/>Pure ataxic hemiparesis (including dysarthria-clumsy hand syndrome)<br/>Thunderclap headache*</p> |
| <b>3. Lasting &gt; 24 hours</b> (<24 hours is a TIA)                                                                                |                                                                                                                                                                                                                                                                                                                                                                                                                                                                                                                                                                                                                                                                                                                                                                              |
| *seen in those with a suspicion of subarachnoid or venous stroke. In this case criteria 1 and 3 does not necessarily have to be met |                                                                                                                                                                                                                                                                                                                                                                                                                                                                                                                                                                                                                                                                                                                                                                              |

5. Clinical syndrome of congestive heart failure:

Using the Framingham criteria relies on clinical signs and symptoms; 1 or more major and two or more minor criteria are clinically suggestive of heart failure:

*Major criteria*

- A. Acute pulmonary edema
- B. Cardiomegaly
- C. Hepatojugular reflex
- D. Neck vein distention
- E. Paroxysmal nocturnal **Dyspnea** or **Orthopnea**
- F. Pulmonary crackles
- G. **Third Heart Sound (S3 Gallup Rhythm)**

*Minor Criteria*

- A. **Ankle edema**
- B. **Dyspnea** on exertion
- C. **Hepatomegaly**
- D. Nocturnal cough
- E. **Pleural Effusion**
- F. **Tachycardia (Heart Rate >120 beats per minute)**



## RHICCA – Clinical endpoint diagnostic criteria vs 3.5 Apr 2018



### 6. Wells Clinical Prediction Rule for DVT (Adapted from: Wells PS et al. Lancet 1997;350:1796).

One point for each of the following:

- Active cancer (treatment ongoing or within previous 6 months, or palliative)
- Paralysis, paresis, or plaster immobilization of lower extremities
- Recently bedridden for more than 3 days, or major surgery, within 4 weeks
- Localized tenderness along distribution of the deep venous system
- Entire leg swollen
- Calf swelling by more than 3 cm when compared with the asymptomatic leg (measured 10 cm below tibial tuberosity)
- Pitting edema (greater in the symptomatic leg)
- Collateral superficial veins (non-varicose)

### 7. Clinical symptoms of meningism

Meningism is the triad of nuchal **rigidity** (neck stiffness), **photophobia** (intolerance of bright light) and **headache**.

### 8. Clinical symptoms of nocardia

Symptoms vary and depend on the organs involved.

If in the lungs, symptoms may include:

- Chest pain when breathing (may occur suddenly or slowly)
- Coughing up blood
- Fevers
- Night sweats
- Weight loss

If in the brain, symptoms may include:

- Fever
- Headache
- Seizures
- If the skin is affected, symptoms may include:
  - Skin breakdown
  - Skin breakdown and abnormal passage or draining tract ([fistula](#))
  - Ulcers or nodules with infection sometimes spreading along lymph nodes

Some people with nocardia infection have no symptoms.

### 9. Symptoms of Pneumocystis Pneumonia

- Fever.
- Mild and dry cough or wheezing.
- Shortness of breath, especially with activity.
- Rapid breathing.
- Fatigue.
- Major weight loss.
- Chest pain when you breathe.

### 10. Clinical syndrome of bacterial pneumonia

- cough with thick yellow, green, or blood-tinged mucus.
- chest pain that worsens when coughing or breathing.
- sudden onset of chills.
- fever of 102°F or above (fever lower than 102°F in older persons)
- headache.
- muscle pain,
- breathlessness or rapid breathing.

## RHICCA – Clinical endpoint diagnostic criteria vs 3.5 Apr 2018



### 11. Clinical finding of Central Nervous System PML

- Deficits in motor function, especially **weakness** and **clumsiness**, are common
- associated altered mental state or behaviour and fever

### 12. Clinical finding of CNS toxoplasmosis

- Headaches
- Seizures
- Focal neurological deficit of a subacute onset
- confusion and coma
- A lung infection, causing cough, fever, and shortness of breath may co-exist.
- 

### 13. Clinical symptoms suggest of Aspergillosis;

- Fever and chills.
- Cough that brings up blood-streaked sputum (hemoptysis)
- Severe bleeding from the lungs.
- Shortness of breath.
- Chest or joint pain.
- Headaches or eye symptoms.
- Nosebleed
- Facial swelling on one side

**Table 1: Abbreviated NARS (Neuropsychiatric AIDS Rating Scale) Grading for HIV Encephalopathy**

Adapted from: Price RW, Brew BJ. The AIDS dementia complex. J Infect Dis 1988; 158 (5): 1079-83, and Hughes CP, Berg L, Danziger WL. A new clinical scale for the staging of dementia. Brit J Psych 1982; 140: 566-92.

| NARS stage | Cognitive-Behavioral Domains                          |                                                     |                                                     |                                                |                                                            |                                               |
|------------|-------------------------------------------------------|-----------------------------------------------------|-----------------------------------------------------|------------------------------------------------|------------------------------------------------------------|-----------------------------------------------|
|            | Orientation                                           | Memory                                              | Motor                                               | Behavior                                       | Problem solving                                            | Activities of daily living                    |
| 0.5        | fully oriented                                        | complains of memory problems                        | fully ambulatory slightly slowed movements          | normal                                         | has slight mental slowing                                  | slight impairment in business dealings        |
| 1          | fully oriented, may have brief periods of "spaciness" | mild memory problems                                | balance, co-ordination and handwriting difficulties | more irritable, labile or apathetic, withdrawn | difficulty planning and completing work                    | can do simple daily tasks, may need prompting |
| 2          | some disorientation                                   | memory moderately impaired, new learning impaired   | ambulatory but may require walking aid              | some impulsivity or agitated behavior          | severe impairment, poor social judgement, gets lost easily | needs assistance with ADLs                    |
| 3          | frequent disorientation                               | severe memory loss, only fragments of memory remain | ambulatory with assistance                          | may have organic psychosis                     | judgement very poor                                        | cannot live independently                     |
| 4          | confused and disoriented                              | virtually no memory                                 | bedridden                                           | mute and unresponsive                          | no problem solving ability                                 | nearly vegetative                             |

# RHICCA – Clinical endpoint diagnostic criteria vs 3.5 Apr 2018

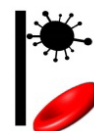

For peer review only

1  
2  
3  
4  
5  
6  
7  
8  
9  
10  
11  
12  
13  
14  
15  
16  
17  
18  
19  
20  
21  
22  
23  
24  
25  
26  
27  
28  
29  
30  
31  
32  
33  
34  
35  
36  
37  
38  
39  
40  
41  
42  
43  
44  
45  
46  
47  
48  
49  
50  
51  
52  
53  
54  
55  
56  
57  
58  
59  
60

# RHICCA – Clinical endpoint diagnostic criteria vs 3.5 Apr 2018

1  
2  
3  
4  
5  
6

**Table 2: Diagnostic criteria for classification of definite, probable, possible, and not tuberculosis meningitis (Marais S, et al. Lancet Infect Dis 2010)**

|                                                                                                                                                                                     | Diagnostic score<br>(Maximum category score=6) |
|-------------------------------------------------------------------------------------------------------------------------------------------------------------------------------------|------------------------------------------------|
| <b>Clinical criteria</b>                                                                                                                                                            | (Maximum category score=6)                     |
| Symptom duration of more than 5 days                                                                                                                                                | 4                                              |
| Systemic symptoms suggestive of tuberculosis (one or more of the following): weight loss (or poor weight gain in children), night sweats, or persistent cough for more than 2 weeks | 2                                              |
| History of recent (within past year) close contact with an individual with pulmonary tuberculosis or a positive TST or IGRA (only in children <10 years of age)                     | 2                                              |
| Focal neurological deficit (excluding cranial nerve palsies)                                                                                                                        | 1                                              |
| Cranial nerve palsy                                                                                                                                                                 | 1                                              |
| Altered consciousness                                                                                                                                                               | 1                                              |
| <b>CSF criteria</b>                                                                                                                                                                 | (Maximum category score=4)                     |
| Clear appearance                                                                                                                                                                    | 1                                              |
| Cells: 10–500 per $\mu$ l                                                                                                                                                           | 1                                              |
| Lymphocytic predominance (>50%)                                                                                                                                                     | 1                                              |
| Protein concentration greater than 1 g/L                                                                                                                                            | 1                                              |
| CSF to plasma glucose ratio of less than 50% or an absolute CSF glucose concentration less than 2.2mmol/L                                                                           | 1                                              |
| <b>Cerebral imaging criteria</b>                                                                                                                                                    | (Maximum category score=6)                     |
| Hydrocephalus                                                                                                                                                                       | 1                                              |
| Basal meningeal enhancement                                                                                                                                                         | 2                                              |
| Tuberculoma                                                                                                                                                                         | 2                                              |
| Infarct                                                                                                                                                                             | 1                                              |
| Pre-contrast basal hyperdensity                                                                                                                                                     | 2                                              |
| Evidence of tuberculosis elsewhere                                                                                                                                                  | (Maximum category score=4)                     |
| <b>Chest radiograph</b> suggestive of active tuberculosis: signs of tuberculosis=2; miliary tuberculosis=4                                                                          | 2/4                                            |
| <b>CT/ MRI/</b> ultrasound evidence for tuberculosis outside the CNS                                                                                                                | 2                                              |
| <b>AFB</b> identified or <i>Mycobacterium tuberculosis</i> cultured from another source—ie, sputum, lymph node, gastric washing, urine, blood culture                               | 4                                              |
| Positive commercial <i>M tuberculosis</i> NAAT from extra-neural specimen                                                                                                           | 4                                              |

44 Exclusion of alternative diagnoses

45 An alternative diagnosis must be confirmed microbiologically (by stain, culture, or NAAT when appropriate), serologically  
 46 (eg, syphilis), or histopathologically (eg, lymphoma). The list of alternative diagnoses that should be considered, dependent  
 47 upon age, immune status, and geographical region, include: pyogenic bacterial meningitis, cryptococcal meningitis, syphilitic  
 48 meningitis, viral meningo-encephalitis, cerebral malaria, parasitic or eosinophilic meningitis (*Angiostrongylus cantonesis*,  
 49 *Gnathostoma spinigerum*, toxocariasis, cysticercosis), cerebral toxoplasmosis and bacterial brain abscess (space-occupying  
 50 Lesion on cerebral imaging) and malignancy (eg, lymphoma)

51 TST=tuberculin skin test. IGRA=interferon-gamma release assay. NAAT=nucleic acid amplification test. AFB=acid-fast bacilli. The individual points for  
 52 each criterion (one, two, or four points) were determined by consensus and by considering their quantified diagnostic value as defined in studies.

53  
54  
55  
56  
57  
58  
59  
60

**Key:**

Bold text: of the options available likely to be the only tool available in a Malawi setting

Greyed out text: ideal investigation but not available in a Malawi setting <http://www.bmjopen.com/site/about/guidelines.xhtml>

# BMJ Open

**Protocol for a longitudinal cohort study to evaluate the reactivation of herpesviruses and inflammation as cardiovascular and cerebrovascular risk factors in antiretroviral therapy initiators, in an African HIV-infected population (RHICCA)**

|                                 |                                                                                                                                                                                                                                                                                                                                                                                                                                                                                                                                                                                                                                                                                                                                                                                                                                                                                                                                                                                                                                                                                                                                                                                                                                                                                                                                                                                                                                                                                                                                       |
|---------------------------------|---------------------------------------------------------------------------------------------------------------------------------------------------------------------------------------------------------------------------------------------------------------------------------------------------------------------------------------------------------------------------------------------------------------------------------------------------------------------------------------------------------------------------------------------------------------------------------------------------------------------------------------------------------------------------------------------------------------------------------------------------------------------------------------------------------------------------------------------------------------------------------------------------------------------------------------------------------------------------------------------------------------------------------------------------------------------------------------------------------------------------------------------------------------------------------------------------------------------------------------------------------------------------------------------------------------------------------------------------------------------------------------------------------------------------------------------------------------------------------------------------------------------------------------|
| Journal:                        | <i>BMJ Open</i>                                                                                                                                                                                                                                                                                                                                                                                                                                                                                                                                                                                                                                                                                                                                                                                                                                                                                                                                                                                                                                                                                                                                                                                                                                                                                                                                                                                                                                                                                                                       |
| Manuscript ID                   | bmjopen-2018-025576.R2                                                                                                                                                                                                                                                                                                                                                                                                                                                                                                                                                                                                                                                                                                                                                                                                                                                                                                                                                                                                                                                                                                                                                                                                                                                                                                                                                                                                                                                                                                                |
| Article Type:                   | Protocol                                                                                                                                                                                                                                                                                                                                                                                                                                                                                                                                                                                                                                                                                                                                                                                                                                                                                                                                                                                                                                                                                                                                                                                                                                                                                                                                                                                                                                                                                                                              |
| Date Submitted by the Author:   | 06-Jul-2019                                                                                                                                                                                                                                                                                                                                                                                                                                                                                                                                                                                                                                                                                                                                                                                                                                                                                                                                                                                                                                                                                                                                                                                                                                                                                                                                                                                                                                                                                                                           |
| Complete List of Authors:       | Peterson, Ingrid; Liverpool School of Tropical Medicine; Malawi Liverpool Wellcome Trust Clinical Research Programme<br>Ntsui, Ntobeko; University of Cape Town<br>Jambo, Kondwani; Liverpool School of Tropical Medicine; Malawi Liverpool Wellcome Trust Clinical Research Programme<br>Kelly, Christine; Malawi Liverpool Wellcome Trust Clinical Research Programme; University College Dublin<br>Huwa, Jacqueline; Malawi Liverpool Wellcome Trust Clinical Research Programme<br>Afran, Louise; Malawi Liverpool Wellcome Trust Clinical Research Programme<br>Tatuene, Joseph; University of Liverpool, Institute of Infection and Global Health; Malawi-Liverpool-Wellcome Trust Clinical Research Programme,<br>Pett, Sarah; University College London, Institute of Infection and Global Health; University of New South Wales, Kirby Institute<br>Henrion, Marc; Malawi Liverpool Wellcome Trust Clinical Research Programme; Liverpool School of Tropical Medicine<br>Van Oosterhout, Joep; University of Malawi College of Medicine; Dignitas International<br>Heyderman, Robert; University College London, Division of Infection and Immunity; University of Malawi College of Medicine, Malawi Liverpool Wellcome Trust Clinical Research Programme<br>Mwandumba, Henry; Liverpool School of Tropical Medicine; Malawi Liverpool Wellcome Trust Clinical Research Programme<br>Benjamin, Laura; University of Liverpool Institute of Infection and Global Health, ; University College London Institute of Neurology, |
| <b>Primary Subject Heading</b>: | Cardiovascular medicine                                                                                                                                                                                                                                                                                                                                                                                                                                                                                                                                                                                                                                                                                                                                                                                                                                                                                                                                                                                                                                                                                                                                                                                                                                                                                                                                                                                                                                                                                                               |
| Secondary Subject Heading:      | HIV/AIDS, Immunology (including allergy), Infectious diseases, Global health                                                                                                                                                                                                                                                                                                                                                                                                                                                                                                                                                                                                                                                                                                                                                                                                                                                                                                                                                                                                                                                                                                                                                                                                                                                                                                                                                                                                                                                          |
| Keywords:                       | Ischaemic heart disease < CARDIOLOGY, EPIDEMIOLOGY, HIV & AIDS < INFECTIOUS DISEASES, Stroke medicine < INTERNAL MEDICINE, Cardiovascular                                                                                                                                                                                                                                                                                                                                                                                                                                                                                                                                                                                                                                                                                                                                                                                                                                                                                                                                                                                                                                                                                                                                                                                                                                                                                                                                                                                             |

1  
2  
3  
4  
5  
6  
7  
8  
9  
10  
11  
12  
13  
14  
15  
16  
17  
18  
19  
20  
21  
22  
23  
24  
25  
26  
27  
28  
29  
30  
31  
32  
33  
34  
35  
36  
37  
38  
39  
40  
41  
42  
43  
44  
45  
46  
47  
48  
49  
50  
51  
52  
53  
54  
55  
56  
57  
58  
59  
60



SCHOLARONE™  
Manuscripts

1  
2  
3  
4  
5  
6  
7  
8  
9  
10  
11  
12  
13  
14  
15  
16  
17  
18  
19  
20  
21  
22  
23  
24  
25  
26  
27  
28  
29  
30  
31  
32  
33  
34  
35  
36  
37  
38  
39  
40  
41  
42  
43  
44  
45  
46  
47  
48  
49  
50  
51  
52  
53  
54  
55  
56  
57  
58  
59  
60

BMJ OPEN

**Title:** Protocol for a longitudinal cohort study to evaluate the reactivation of herpesviruses and inflammation as cardiovascular and cerebrovascular risk factors in antiretroviral therapy initiators, in an African HIV-infected population (RHICCA)

**Authors:**

Ingrid Peterson<sup>1,2</sup>, Ntobeko Ntsui<sup>3</sup>, Kondwani C Jambo<sup>1,2</sup>, Christine Kelly<sup>1,4</sup>, Jacqueline Huwa<sup>1</sup>, Louise Afran<sup>1</sup>, Joseph Kamtchum-Tatuene<sup>5</sup>, Sarah Pett<sup>6,7,8</sup>, Marc Yves Romain Henrion<sup>1,2</sup>, Joep Van Oosterhout<sup>9,10</sup>, Robert Heyderman<sup>11</sup>, Henry C Mwandumba<sup>1,2</sup>, Laura A Benjamin<sup>4,12\*\*</sup> on behalf of the Investigators of the RHICCA study\*

**Affiliations:**

1. Malawi-Liverpool-Wellcome Trust Clinical Research Programme, University of Malawi College of Medicine
2. Department of Clinical Sciences, Liverpool School of Tropical Medicine
3. Department of Medicine, University of Cape Town
4. HIV Molecular Research Group, University College Dublin
5. Institute of Infection and Global Health, University of Liverpool
6. Institute of Global Health, University College London
7. MRC CTU at UCL, Institute of Medicine, Clinical Trials and Methodology, University College London
8. Kirby Institute, University of New South Wales, Australia
9. Dignitas International, PO Box 071, Zomba, Malawi
10. College of Medicine, University of Malawi
11. Department of Infection and Immunity, University College London
12. Department of Brain Repair and Rehabilitation, Institute of Neurology, UCL

1 BMJ OPEN  
2  
3  
4  
5

6 \*The Investigators of the RHICCA study  
7

8 Brian Angus - Oxford Centre for Clinical Tropical Medicine, University of Oxford  
9

10 Myles Connor - University of Edinburgh  
11  
12

13 Reena Dwivedi - Greater Manchester Neurosciences Centre, Salford Royal Foundation Trust  
14

15 Lewis Haddow - Institute for Global Health, University College London  
16  
17

18 Terttu Heikinheimo-Connell - Hyvinkää Hospital, Department of Neurology, University of  
19 Helsinki  
20  
21

22 Elizabeth Joekes - Liverpool School of Tropical Medicine  
23  
24

25 Vanessa Kandoole - Department of Medicine, University of Malawi College of Medicine,  
26 Blantyre  
27  
28

29 Moffat Nyrienda - MRC Research Unit, Uganda  
30  
31

32 Kennedy Malisita- Department of Medicine, Queen Elizabeth Central Hospital  
33  
34

35 Jane Mallewa- Department of Medicine, University of Malawi College of Medicine, Blantyre  
36  
37

38 Elsayed Z. Soliman - School of Medicine, Wake Forest School of Medicine  
39  
40

41 Tom Solomon - Institute of Infection and Global Health, University of Liverpool  
42  
43

44 \*\*Corresponding author  
45  
46

47 Laura Benjamin  
48  
49

50 Institute of Infection and Global Health,  
51  
52

53 Ronald Ross building,  
54  
55

56 The University of Liverpool,  
57  
58

59 L69 7BE, Liverpool,  
60  
61

United Kingdom



1  
2  
3  
4  
5  
6  
7  
8  
9  
10  
11  
12  
13  
14  
15  
16  
17  
18  
19  
20  
21  
22  
23  
24  
25  
26  
27  
28  
29  
30  
31  
32  
33  
34  
35  
36  
37  
38  
39  
40  
41  
42  
43  
44  
45  
46  
47  
48  
49  
50  
51  
52  
53  
54  
55  
56  
57  
58  
59  
60

BMJ OPEN

[l.benjamin@liverpool.ac.uk](mailto:l.benjamin@liverpool.ac.uk)

**Key words:**

Cardiovascular, cerebrovascular, HIV, herpesvirus, Immune dysregulation,

**Journal Guidance:**

Abstract word count: 300/300

Article word count: 4095 /4000

Figure/Table: 5/5

BMJ OPEN

**ABSTRACT**

**Introduction:** In Sub-Saharan Africa, rising rates of cerebrovascular and cardiovascular disease (CBD/CVD) are intersecting with an aging HIV-infected population. The widespread use of antiretroviral therapy (ART) may confer an additive risk and may not completely suppress the risk associated with HIV infection. High-quality prospective studies are needed to determine if HIV-infected patients in Africa are at increased risk of CBD/CVD and to identify factors associated with this risk. This study will test the hypothesis that immune activation and dysfunction, driven by HIV and reactivation of latent herpesvirus infections lead to increased CBD/CVD risk in Malawian adults aged  $\geq 35$  years.

**Methods and Analysis:** We will conduct a single-centre 36-month prospective cohort study in 800 HIV-infected patients initiating antiretroviral therapy (ART) and 190 HIV-uninfected controls in Blantyre, Malawi. Patients and controls will be recruited from government ART clinics and the community, respectively and will be frequency-matched by 5-year age band and sex. At baseline and follow-up visits, we will measure carotid intima thickness (CIMT), pulse wave velocity (PWV) as surrogate markers of vasculopathy, and thus CBD/CVD risk. Our primary exposures of interest will be prospectively measured; these include cytomegalovirus and varicella zoster reactivation, changes in HIV plasma viral load, and markers of systemic inflammation and endothelial function. Multivariable regression models will be developed to assess the study's primary hypothesis. The occurrence of clinical CBD/CVD will be assessed as secondary study endpoints. ISRCTN registry <https://doi.org/10.1186/ISRCTN42862937>.

**Ethics and dissemination:** This was approved by the University of Malawi College of Medicine and the Liverpool School of Tropical Medicine research ethics committees. Our goal is to gain insight into the pathogenesis of cardiovascular and cerebrovascular disease among HIV cohorts on ART, in sub-Saharan Africa, and provide data to inform future interventional clinical trials. This study started in May 2017 and will continue until August 2020.

#### STRENGTHS AND LIMITATIONS

- This is one of the first large-scale studies in Sub-Saharan Africa to explore the relationship between HIV infection, latent herpesviruses, inflammation and cardiovascular and cerebrovascular diseases, immediately after starting antiretroviral therapy (ART).
- Clinical events and death will be comprehensively reviewed through an end-point review committee, using strict diagnostic criteria for events based on those used in the INSIGHT network, or validated verbal autopsy for death with limited data.
- Because of the recent roll-out of ART in asymptomatic patients, there will be an absence of ART-naïve population, limiting our ability to explore the impact of ART.
- Approximately one-third of strokes will be asymptomatic. We anticipate not capturing some of these. However, multiple cerebral infarcts without a focal neurological deficit will manifest as cognitive impairment, which we will screen for, and corroborate with MRI imaging in a small number of symptomatic cases.
- Two-thirds of myocardial infarction will be silent and could potentially be missed. In a nested group, we will use a digital electrocardiogram to evaluate this further.

BMJ OPEN

**INTRODUCTION**

The growing epidemic of cerebrovascular disease (CBD e.g. Stroke) and cardiovascular disease (CVD e.g. myocardial infarction) now intersects with the HIV epidemic<sup>1</sup>. Countries like Malawi, have an adult HIV prevalence of approximately 10%<sup>2</sup>. There is an increased life expectancy among people living with HIV, largely because of the successful scale-up of ART<sup>3</sup>. In Europe and the US, HIV is associated with a 50% increased risk of CVD compared to HIV-uninfected populations<sup>4</sup>, attributable to long-term antiretroviral therapy (ART) use and HIV *per se*<sup>4 5</sup>. HIV infection is also associated with a 1.8 fold increased risk of all-cause heart failure in US veterans<sup>6</sup>. Our recent case-control study of stroke in Malawian adults is one of several examples that demonstrates a high risk of HIV infection associated with stroke and heart disease, pointing to a considerable and unappreciated CBD/CVD risk among HIV patients, in this setting<sup>7-10</sup>.

There are reports of geographical differences in the distribution of CVD risk factors, supporting the argument that evidence derived from high-income countries cannot be applied to Sub-Saharan (SSA)<sup>11</sup>. Addressing this knowledge gap is essential to the development of clinical drug trials for primary prevention of CBD/CVD among individuals living with HIV. Vasculopathy due to accelerated atherosclerosis, arterial stiffening and vasculitis are the major mechanisms believed to underlie the CBD/CVD burden<sup>12 13</sup>. It is hypothesized that despite viral suppression, low-grade HIV virus replication and the associated host systemic inflammation are important drivers of this vasculopathy (Figure 1). In patients receiving ART, HIV antigenemia, partly resulting from HIV persistence in sanctuary sites, incomplete virologic suppression and virologic resurgence, drives the chronic immune activation observed in about 20% of ART patients in SSA<sup>14</sup>. This immune state is characterized by ongoing activation and senescence of cell-mediated immunity<sup>15 16</sup>, increased monocyte/macrophage activation, stimulation of the interleukin-6 (IL-6) pathway and production of acute phase proteins<sup>17-19</sup>. Activation of the IL-6 pathway is established with atherosclerosis<sup>20 21</sup>, and may also contribute to non-atherosclerotic vasculopathy. Inflammation alone confers a 2-fold increased risk of clinical CBD/CVD events<sup>22</sup>. The current push to introduce more effective ART regimens, and to start treatment soon after HIV diagnosis is made, may reduce inflammation and in turn, CBD/CVD risk<sup>23</sup>. However, there is

BMJ OPEN

1  
2  
3 growing evidence of chronic inflammation in HIV despite achieving the goal of therapy,  
4 which is long-term suppression (<50 copies/mL) of plasma viral load, suggesting adjunctive  
5 therapy may be required.<sup>24-26</sup>  
6  
7  
8  
9

10  
11 In addition to HIV, there is compelling evidence that reactivation of latent herpesviruses  
12 may be an important cause of vasculopathy. In HIV-uninfected elderly populations from  
13 high-income settings, latent cytomegalovirus (CMV) infection drives dysregulation of cell-  
14 mediated immunity<sup>15 27-29</sup>, not dissimilar to what's described in HIV-associated immune  
15 activation<sup>29</sup>. CMV and other viral proteins have been found in atherosclerotic plaques<sup>20</sup>.  
16  
17 Varicella-zoster virus (VZV) can directly infect the vascular endothelium to cause vasculitis  
18 and subsequent stroke and was found to be the commonest opportunistic infection  
19 (prevalence 15%) in a study of HIV-infected stroke patients in Malawi<sup>12</sup>. The  
20 seroprevalence of herpesviruses is high in SSA<sup>30</sup>, particularly in HIV-infected populations<sup>16</sup>.  
21  
22  
23  
24  
25  
26  
27  
28

29  
30 The involvement of herpesviruses in the mechanistic pathway for CBD/CVD is compelling  
31 and may offer additional therapeutic avenues, especially for CMV and VZV. However, our  
32 understanding is incomplete, and its population impact is yet to be defined. It is important  
33 to determine if, in addition to ART, there is a role for other pharmacological interventions  
34 targeting latent viral infections or downstream inflammatory pathways to reduce  
35 vasculopathy in HIV-infected patients on ART. Previous work from North America supports  
36 the potential of treating reactivated herpesviruses<sup>31</sup>. Furthermore, there are opportunities  
37 for intervention using the recently licensed Letemovir; a treatment for CMV. By focusing on  
38 HIV and Herpes viral antigenemia and immune dysregulation as mechanisms of  
39 vasculopathy, this study will identify subgroups of HIV-infected patients on ART at high risk  
40 of CBD/CVD, the timing of CBD/CVD risk in such patients, as well as potential targets for  
41 intervention.  
42  
43  
44  
45  
46  
47  
48  
49  
50  
51  
52  
53  
54  
55  
56  
57  
58  
59  
60

BMJ OPEN

## STUDY OBJECTIVES

This study will test the hypothesis that immune activation and dysfunction, driven by HIV and reactivation of latent CMV/VZV herpesvirus infections lead to increased CBD/CVD risk in adults aged  $\geq 35$  years in SSA. We will address this through the following objectives;

- 1) To determine if progression of the surrogate marker of CBD/CVD or occurrence of new-onset vasculopathy is higher in adults aged  $\geq 35$  years with HIV infection on ART compared to those without HIV.
- 2) To determine if progression of surrogate markers of CBD/CVD or occurrence of new-onset vasculopathy is higher in adults aged  $\geq 35$  years with HIV/herpes viral antigenemia or chronic immune activation compared to those without HIV/herpes viral antigenemia or chronic immune activation. Specifically, we will determine if progression of surrogate markers or new-onset vasculopathy is higher:
  - a. in ART patients with reactivated latent herpes viral infection, compared to those without reactivated latent herpes viral infection.
  - b. in ART patients with the highest 25% of markers for immune activation, inflammation or endothelial activation compared to the bottom 25%
  - c. in ART patients with incomplete virologic suppression or virologic resurgence of HIV, compared to those with suppressed HIV plasma viral load.

The secondary study objectives are to determine if viral antigenemia or chronic immune activation increase occurrence of the following clinical events: 1) stroke, 2) myocardial infarction (MI), 3) angina (excluding MI), 4) peripheral vascular disease (PVD), 5) all-cause death/vascular-related death and 6) immune reconstitution inflammatory vasculopathy.

## METHODS AND ANALYSIS

### Study design

To address objective 1, we will conduct a single-center 36-month prospective cohort study in 800 HIV-infected patients initiating ART and 190 HIV-uninfected adults aged  $\geq 35$  years. HIV-infected and HIV-uninfected participants will be frequency matched by 5-year age band and sex. On a 6-monthly basis, we will measure markers of viral infection, inflammation and endothelial function along with surrogate markers for CBD/CVD (Table 1).

BMJ OPEN

### Study Setting

This study will recruit consecutive ART patients from the ART clinic of Queen Elizabeth Central Hospital (QECH), and ART clinics in several Blantyre City Community Health Centres (CHCs). These clinics collectively initiate over 100 HIV-infected patients aged  $\geq 35$  years onto ART each month. HIV-uninfected adults will be selected from pre-ART counseling sessions, and from randomly selected households in the community by two-stage random sampling (of households and individuals within households) from a previously enumerated sampling frame in the CHC catchment areas<sup>32</sup>. All study procedures will be conducted at QECH, which is located adjacent to the Malawi-Liverpool-Wellcome Trust Clinical Research Programme (MLW). QECH also hosts a 0.35T MRI imaging facility, which will contribute to characterizing our secondary endpoints.

### Study Participants

Study inclusion criteria will be: a) age  $\geq 35$  years and b) resident in Blantyre. HIV-infected patients must further be: c) ART-naïve or initiated ART  $<10$  days prior to enrolment and d) initiating standard first-line ART (in Malawi this is: Tenofovir [TDF]/Lamivudine [3TC]/Efavirenz [EFV]). Adult controls must further be: e) HIV-uninfected. Study exclusion criteria are: f) clinical history of CBD/CVD, g) pregnancy, h) critical illness or symptomatic anemia at baseline and i) enrollment in an intervention study. At the analysis stage abnormal PWV at baseline (as defined in Table 2) will be excluded for new-onset vasculopathy analysis but not for progression of vasculopathy. The same approach will be applied for baseline CIMT measurements. If the study participant becomes pregnant after recruitment, they will be withdrawn.

Justification of study inclusion and exclusion criteria is as follows; in many populations, CBD/CVD risk rises sharply from 35-years of age<sup>33</sup>, thus individuals aged 35 and older will be eligible (recruitment of participants aged 35 -39 will be limited to 15% of the study sample to avoid overrepresentation). Restricting recruitment by age will enable this study to have greater statistical power. For clarity of etiologic inference, the study will assess the risk of new-onset vasculopathy not associated with pregnancy and thus exclude patients who are pregnant or with a history of CBD/CVD. To eliminate confounding by ART regimen, patients

BMJ OPEN

1  
2  
3 must initiate on standard first-line ART (> 90% of ART patients in Blantyre do this). Critically  
4 ill patients are excluded primarily for ethical reasons.  
5  
6  
7  
8

### 9 Laboratory methods

#### 10 ***Surface immunophenotyping of peripheral blood mononuclear cells***

11  
12  
13  
14 Immunophenotyping will be used to characterize peripheral blood mononuclear cells  
15 (PBMC) isolated from blood samples of HIV-uninfected and HIV-infected ART initiators.  
16 PBMCs will be harvested by density centrifugation using lymphoprep (Axis Shield, UK).  
17 PBMCs ( $2 \times 10^6$ ) will be stained with anti-CD45 PerCP CY5.5, anti-CD3 AF700, anti-CD4 BV421,  
18 anti-CD8 PE Dazzle, anti-CD38 BV605, anti-HLA-DR APC CY7, anti-CD57 APC, anti-PD1 PE CY7,  
19 anti-CTLA4 PE, and anti-CD223 FITC (all from eBiosciences, UK) to determine the expression  
20 of these markers on the surface of T-cells. In addition, ( $2 \times 10^6$ ) PBMCs stained with anti-CD16  
21 BV421, anti-CD14 PE, anti-HLA-DR PerCP CY5.5, anti-CD45 AF700, anti-CCR2 BV605, anti-  
22 CD11b APC, anti-CX3CR1 PE Dazzle and anti-CD38 FITC (all from eBiosciences, UK) will be  
23 used for monocytes. Dead cells, CD3<sup>+</sup> T-cells, and CD56<sup>+</sup> NK cells will be excluded using:  
24 LIVE/DEAD™ Fixable Aqua Dead Cell Stain (Thermofisher, UK), anti-CD3 BV503 and anti-  
25 CD56 BV503 (eBiosciences, UK), respectively. Stained cells will be acquired on a BD LSR  
26 Fortessa flow cytometer (Becton Dickinson, USA) and data will be analyzed using FlowJo  
27 software version 10.0 (Tree Star, San Carlos, CA). For each stained sample analyzed, the  
28 median fluorescence intensity (MFI) for each parameter will be normalized to its respective  
29 unstained control.  
30  
31  
32  
33  
34  
35  
36  
37  
38  
39  
40  
41  
42  
43  
44  
45  
46

#### 47 ***Measurement of soluble markers of immune activation using multiplex bead array***

48  
49 A custom-made multiplex assay will be used to assess soluble markers of monocyte  
50 activation (CD163), systemic inflammation (Interleukin-6) and endothelial activation  
51 (Intracellular adhesion molecule 1) in plasma, isolated from blood samples of HIV-  
52 uninfected and HIV-infected ART initiators. Following isolation, plasma will be aliquoted and  
53 stored at -80°C until further use.  
54  
55  
56  
57  
58  
59  
60



BMJ OPEN

### ***Assessment of exposure to human cytomegalovirus and varicella zoster virus by ELISA***

Quantitative VIDAS CMV IgG and IgM (BioMerieux, USA) and VZV glycoprotein IgG Low-Level Enzyme Immunoassay Kit [VaccZyme™EIA], will be used to determine exposure to these viruses using a commercial enzyme-linked immunosorbent assay (ELISA) platform. These kits will detect VZV antigen to a sensitivity and specificity of 97.8% and 96.8% respectively and for CMV, 97.2% and 100% for IgG and 100% and 97.4% for IgM respectively<sup>34 35</sup>. Plasma samples from HIV-uninfected and HIV-infected ART initiators stored at -80°C following collection will be used for these assessments

### ***HIV***

HIV infection will be diagnosed using two rapid tests in parallel, EIA rapid tests (Determine HIV-1/2 [Abbott Laboratories, USA] and Uni-Gold HIV [Trinity Biotech PLC, Ireland]), will be used as a tiebreak). HIV-1 RNA levels in plasma will be measured using the Abbott Real-Time HIV-1 assay with a lower limit of detection of 150 copies/mL (Abbott Molecular, Germany), according to the manufacturer's instructions. CD4+ T-cell count measurements will be performed using BD FACS Count machine (Partec platform).

### **Procedures**

Carotid-femoral pulse wave velocity (PWV)<sup>36</sup> and carotid intima-media thickness (CIMT)<sup>37</sup> measurement will be performed in accordance with expert consensus guidelines, using a standardized study protocol on the Vicorder system (SMART Medical, UK) and Philips CX50 machine (Philips healthcare, UK) respectively. CIMT measurements will be performed by three trained operators. The intra-class correlation coefficient will be used to assess the performance of the operators against that of a certified neurosonologist prior to study commencement.

BMJ OPEN

## Outcomes

### **Primary outcomes**

Primary outcomes are the progression of surrogate markers of CBD/CVD, namely PWV and CIMT as well as the occurrence of new-onset vasculopathy defined by threshold values outlined in Table 2.

### **Secondary outcomes**

Secondary outcomes are the following clinical events: 1) stroke, 2) myocardial infarction (MI), 3) unstable angina, 4) peripheral vascular disease (PVD), 5) all-cause death/ vascular death and 6) immune reconstitution inflammatory syndrome (IRIS) vasculopathy (Table 2). Changes in PWV or endothelial activation at 6 months post ART initiation will be interpreted as a subclinical vascular IRIS event. These outcomes will be assessed through active surveillance in QECH inpatient wards for admissions of study participants. To improve capture of clinical outcomes, we will conduct brief telephone interviews with study participants about CBD/CVD symptoms and hospitalizations between study visits and facilitate unsolicited participant self-report. Clinical events and deaths in study participants will be reviewed by an independent endpoint review committee (ERC), comprising of clinicians experienced in Endpoint review. Each event will be reviewed and adjudicated by the ERC Chair and 2 ERC reviewers, using a standard set of diagnostic criteria (Table 2 and Supplement – S1). The format of reporting will be based on modifications of the [INSIGHT](#) network clinical diagnostic criteria. Deaths will be reviewed by the ERC using the CoDe approach<sup>23</sup>. For death with limited clinical data, a validated verbal autopsy will be performed to ascertain the cause<sup>38</sup>.

## Exposures

The exposure for Primary Objective 1 will be HIV status. Yearly HIV rapid tests in HIV-uninfected adults will be performed to exclude those with new HIV infections (Figure 2).

Potential confounding and mediating factors will be recorded in study participants. This will include demographic factors, lifestyle and behavioral factors (e.g. cigarette smoking and alcohol consumption), chronic co-morbidities (i.e. hypertension, diabetes), cardiometabolic,

BMJ OPEN

1  
2  
3 renal and hematological factors (i.e. full blood count, creatinine in urine and serum, body-  
4 mass-index, waist-to-hip ratio, random glucose, HbA1c, and lipid profile). Blood pressure will  
5 be measured at all study visits. Although vascular immune reconstitution inflammatory  
6 syndrome (IRIS) (Table 2) will be considered as a primary endpoint, non-vascular IRIS will be  
7 defined as a risk factor. Where feasible, we will conduct PCR tests for common causes of IRIS  
8 in blood or cerebrospinal fluid (CSF) samples. Adherence to ART and change of ART regimen  
9 will be assessed at all study visits through extraction of data from 'ART master cards'; this is  
10 a government-supported monitoring tool used by all patients on ART, in Malawi.  
11  
12  
13  
14  
15  
16  
17  
18  
19

20 For Objective 2a-2c, markers of herpes and HIV viral antigenemia and immune inflammation  
21 will be measured according to the outline in Table 1. For primary objective 2a, reactivated  
22 latent herpes viral infections will be assessed by quantification of VZV, and CMV antibodies.  
23 We will estimate the risk of atherosclerosis and arterial stiffening associated with current  
24 herpesviruses reactivation at baseline, and sustained reactivation (i.e. those that continue  
25 to have a high titer from measurement at baseline to 6 months after ART initiation).  
26 Hyperactivation of B cells may result in an expansion of polyclonal antibodies and thus an  
27 overestimation of virus-specific antibody titers. To address this issue and make appropriate  
28 adjustments for hypergammaglobulinemia we will 1) measure more than one herpesviruses  
29 and 2) measure total IgG.  
30  
31  
32  
33  
34  
35  
36  
37  
38  
39  
40

41 For primary objective 2b, markers of immune activation, inflammation, and endothelial  
42 activation will be measured (Figures 1 & Table 1). Quantitative cell surface  
43 immunophenotyping will be performed for CD4+ and CD8+ T-cell activation (e.g. HLA-DR)  
44 and senescence (e.g. CD57) in a subset of participants. In all study participants, at baseline,  
45 6, 12, months, we will measure soluble markers associated with systemic inflammation and  
46 endothelial activation.  
47  
48  
49  
50  
51  
52  
53  
54

55 For primary objective 2c, incomplete viral response and viral rebound of HIV will be  
56 measured by quantitative PCR in patients on ART.<sup>39</sup> HIV viral load will be measured in  
57 patients on ART at 0, 6 and 12 months.  
58  
59  
60

BMJ OPEN

### Data Collection Between May 2017 and August 2020

The two-stage screening will be conducted to find and recruit potential study participants. A trained field worker will first screen to assess eligibility for criteria (a)-(c) in pre-ART counseling sessions, and in individuals from randomly selected households in the community. Eligible participants will then be referred to QECH to complete screening for criteria (d)-(i) and if eligible, consented to participate in the study. At study visits, a tablet-based, standardized Open Data Kit (ODK) case report form (CRF) will be administered in one-on-one interviews by a study nurse to capture demographic and clinical data. Study data will be collected as outlined in Table 1. Daily upload of electronic data will occur with oversight from the data manager at MLW. We will collect up to 30ml of whole blood. An ACR dipstick test will be used to test for creatinine, proteinuria, and glucosuria. In a subset of participants, an electrocardiogram supported by a digital platform and echocardiogram will be performed at baseline, 6 and 24 months, as well as in any participant experiencing a clinical event suggestive of a cardiac etiology. To facilitate the retention and clinical referrals of participants, contact will be made every 3 months to assess the occurrence of clinical events. Participants who miss a scheduled study visit will be contacted by phone and/or visited at home to assess their willingness to maintain their participation and to record intervening clinical events. Recording and definitions of other clinical events, including HIV associated events will be evaluated by the ERC chair. SMS messages will be used for appointment reminders. Technical appendix, statistical code, and dataset will be made available from a data repository, after publication of our work.

### Sample Size and Statistical Analysis

The required sample size for the study's primary objectives is 800 HIV-infected patients and 190 HIV-uninfected adults using standard, normal distribution approximation sample size formulas for comparing proportions in two groups of unequal size and based on the following assumptions: **a)** 18.4% of HIV positive study participants have abnormal PWV at baseline. We will exclude these participants from analysis. The 18.4% figure is informed by our ongoing studies of vasculopathy in HIV-infected patients, where this is the percentage of participants aged  $\geq 35$  years that have a PWV ( $>12$  m/s). **b)** 20% of both HIV-infected patients and HIV-uninfected adults will be lost to follow-up, including by death and HIV

BMJ OPEN

1  
2  
3 sero-conversion<sup>40 41</sup>. **c)** The minimum relative risk (RR) of interest is 2 for Objective 1 and 1.8  
4 for Objective 2. **d)** The 24-month cumulative risk of clinically significant vasculopathy over  
5 study follow-up is 18.4% in the HIV positive group. This is based on the same study data  
6 cited in (a). **e)** For objectives 2a)-c), the exposure prevalence for each risk factor is 20%. **f)**  
7 Statistical tests will have 80% power based on a 2-sided test with;  $\alpha=0.05$ . Testing of  
8 hypotheses for the secondary outcome will be exploratory. However, we estimate 26  
9 strokes (4 mimics), an unknown number of MIs and 80 deaths occurring during the study<sup>7 42</sup>.  
10 Taken together, c), d), e) mean that, for 80% power, we assume a 24-month cumulative  
11 vasculopathy risk of 9.2% in HIV negative participants, 18.4% in all HIV infected participants,  
12 15.9% in HIV infected participants not exposed to the risk factors from objectives 2a)-c),  
13 28.6% in the HIV infected participants exposed to these risk factors.  
14  
15  
16  
17  
18  
19  
20  
21  
22  
23  
24  
25

26 The reporting of this study will be prepared in accordance with the STROBE guidelines<sup>43</sup>.  
27 Summary and descriptive statistics will be tabulated for all primary and secondary outcome  
28 variables, as well as for exposure variables and potential confounding or mediating factors.  
29 Time plots for all outcome variables will be inspected. Quantitative data analysis will be  
30 conducted to assess the primary outcomes.  
31  
32  
33  
34  
35  
36  
37

38 There will be 3 analysis time points: 1) after recruitment has finished and baseline data is  
39 available for all participants (baseline analysis), 2) once every participant has completed 6  
40 months in the study (6-month analysis) and 3) at 36 months, when each participant has  
41 completed 24 months in the study (final analysis).  
42  
43  
44  
45

46 The baseline analysis will largely consist of descriptive statistics on participant characteristics  
47 and data recorded at baseline. Simple regression models will also be used to investigate  
48 relationships between exposure and outcome variables measured at baseline. Unadjusted  
49 analyses will consist of paired t-tests or Wilcoxon signed rank tests (depending whether the  
50 data are normally distributed or not) for continuously measured variables and Chi-Squared or  
51 Fisher's exact tests (depending on contingency table cell counts) for binary and categorical  
52 variables. Adjusted analyses will be conducted using generalised linear models (GLMs).  
53  
54  
55  
56  
57  
58  
59  
60

## BMJ OPEN

1  
2  
3 The 6-month analysis will be limited in scope and serves 2 purposes: 1) characterise new onset  
4 vasculopathy in HIV-infected participants that have initiated ART treatment at baseline  
5 (vascular IRIS) and 2) define vasculopathy outcomes for the final analysis. The main analysis  
6 of the study data happens at the final analysis time point.  
7  
8  
9

10  
11 For objective 1 we will develop three regression models. Two GLMs will be developed to  
12 compare mean progression of arterial damage from baseline in HIV-infected ART patients and  
13 HIV-uninfected adults. These models will regress change from baseline in PWV, respectively  
14 cIMT, on HIV status. We will develop a third model to estimate the RR and population  
15 attributable fraction of new-onset arterial damage in HIV-infected patients compared to HIV-  
16 uninfected adults.  
17  
18  
19  
20  
21  
22  
23  
24

25 For objective 2a, a set of GLMs will be developed to compare mean progression of  
26 vasculopathy in HIV-infected ART patients with and without reactivated latent herpes viral  
27 infection. These models will regress change from baseline in PWV, respectively cIMT, on two  
28 log-transformed variables for antibody titres of CMV and VZV, respectively.  
29  
30  
31  
32  
33  
34

35 For objective 2b, we will again fit a set GLMs, with change from baseline in PWV as response  
36 variable, this time to investigate if, in HIV-infected ART patients, there is an association  
37 between progression of vasculopathy and immune activation and inflammation biomarkers  
38 (IL-6, ICAM, CD163). Specifically, for each marker, we will regress PWV on marker quantiles.  
39 After having built models for each marker, we will then develop comprehensive multiple  
40 regression models for PWV and cIMT with multiple independent markers as predictor  
41 variables.  
42  
43  
44  
45  
46  
47  
48  
49

50 For objective 2c, we will proceed as for objective 2a, but comparing HIV-infected ART patients  
51 with incomplete virological suppression or virological resurgence of HIV to those with  
52 suppressed HIV plasma viral load.  
53  
54  
55  
56  
57  
58  
59  
60

BMJ OPEN

1  
2  
3 In addition to these analyses, given the repeated measurements for PWV, immune  
4 activation, inflammation markers, we will extend the GLMs for PWV to linear mixed models  
5 taking full account of the longitudinal nature of the data. Mixed models will also handle  
6 deviations from the visit schedule in a principled fashion and use all available data for drop-  
7 outs. In the case a log link function is required for PWV in the GLMs, we will fit marginalised  
8 models using GEE instead of the LMMS.  
9  
10  
11  
12  
13  
14  
15  
16

17 For secondary study objectives, we will use univariate methods to assess the frequency of  
18 clinical events within exposure strata. If there are sufficient numbers of clinical events we will  
19 develop Poisson or negative binomial regression models (depending on model fit) for each  
20 clinical event type to compare exposure-defined participants.  
21  
22  
23  
24  
25  
26

27 We will also use time-to-event models, specifically Cox proportional hazard models, to  
28 investigate associations between all-cause mortality and exposures.  
29  
30  
31  
32

33 As part of exploratory analyses, we will aim to identify risk groups that are potentially  
34 incompletely captured with the measured exposure variables. We will perform  
35 unsupervised group-based multi-trajectory modeling of multivariate longitudinal patient  
36 trajectories to confirm any associations we have found using more traditional approaches<sup>44</sup>.  
37  
38  
39  
40  
41  
42  
43

44 All efforts will be made to collect complete data on all study participants. However, there  
45 will inevitably be missing data due to drop-outs and a variety of other reasons. All primary  
46 analyses will be performed using multiple imputation. For sensitivity analyses, we will use  
47 all-available-cases (AAC), direct likelihood and fully Bayesian models and, for GEE models,  
48 weighted GEE. If the number of missingness patterns is sufficiently small, we will also use  
49 pattern mixture models which can be used under the general missing-not-at-random setting  
50 but make additional identification assumptions.  
51  
52  
53  
54  
55  
56  
57  
58  
59  
60

BMJ OPEN

## PATIENT PUBLIC INVOLVEMENT

The global burden of HIV associated CBD and CVD has tripled over the last two decades with the greatest impact in sub-Saharan Africa. CBD and CVD are a priority for patients in Malawi as HIV infection is endemic and the population are living for longer. Knowledge of this, informed our research question with the aim of understanding the mechanisms and thus direct targeted novel therapies to reduce this burden. Patients will be involved in the recruitment of the study, but not in the design. Patients and their advisors will be thanked for contributing to the study.

## ETHICS AND DISSEMINATION

Written informed consent will be obtained from all study participants, either written or witnessed verbal consent with thumbprint if the participant is non-literate. Study data will be maintained in an encrypted and password protected database to which only study staff will have access. Study participants who develop a clinical event will be managed, using the hospital guidelines, by our study clinician alongside the hospital doctor. Clinical data will be anonymized using unique identifying code. Study data will be kept for 10 years and then destroyed with a record, as recommended by good clinical practice guidelines. This protocol was approved by the ethics committees at University of Malawi College of Medicine (Protocol P02/16/1874) and the Liverpool School of Tropical Medicine (Protocol 16-014).

## DISCUSSION

African regions continue to bear the brunt of HIV infection, in 2013, an estimated 8.5 million adults were receiving ART<sup>45</sup>. As the landscape evolves, this population will live longer with stable HIV infection but likely remain at an increased risk of CBD/CVD compared to HIV-uninfected individuals of a similar age and sex. This study will be the first to determine the extent to which HIV reactivation of herpesvirus infection and inflammation contribute to CBD/CVD risk in an adult African population starting ART. The results of this work could potentially open avenues for novel anti-inflammatory and anti-viral interventions for the primary prevention of CBD/CVD in HIV populations in Africa.



1  
2  
3  
4  
5  
6  
7  
8  
9  
10  
11  
12  
13  
14  
15  
16  
17  
18  
19  
20  
21  
22  
23  
24  
25  
26  
27  
28  
29  
30  
31  
32  
33  
34  
35  
36  
37  
38  
39  
40  
41  
42  
43  
44  
45  
46  
47  
48  
49  
50  
51  
52  
53  
54  
55  
56  
57  
58  
59  
60

BMJ OPEN

## **ACKNOWLEDGMENTS**

The authors would like to thank Agbor Ako and Maria Davy from Research and Development, GlaxoSmithKline and the NCD Africa Open Lab of GlaxoSmithKline review committee for providing valuable advice for this protocol. The authors would like to thank BA, MC, LH, THC, JVO, NT for their contribution to the End Point Review Committee, RD and EJ for radiology training and quality control, EZS for providing an electrocardiogram platform and for his cardiology review, VK for input with the echocardiogram protocol, and TS, JM, KM, MN for their input in the advanced drafts of the manuscript. We also extend our gratitude to the INSIGHT network for sharing their clinical endpoint criteria. LB is supported by an NIHR Clinical Lecturer Fellowship. SP is supported by an MRC (UK) core funding MC\_UU\_12023/23.

## **AUTHORS' CONTRIBUTIONS**

LB and IP developed the first draft. HM, NN, KJ, CK, LA, JKT, SP, MH, JVO, RH had major input for the revision of the second draft. JH is the project manager for RHICCA with oversight from LB, IP, and HM. MH contributed to the statistical methods. LB, JKT, JVO contributed to the clinical training. SP chaired the End point Review Committee.

## **FUNDING STATEMENT**

Funding for this study was provided by the GlaxoSmithKline Africa Non-Communicable Disease Open Lab Grant (Project Number: 7964)

## **COMPETING INTERESTS**

SLP has academic grants from Sysmex Corporation, Gilead Sciences, and ViiV Healthcare. All other authors have no competing interest.

BMJ OPEN

1  
2  
3  
4  
5  
6  
7  
8  
9  
10  
11  
12  
13  
14  
15  
16  
17  
18  
19  
20  
21  
22  
23  
24  
25  
26  
27  
28  
29  
30  
31  
32  
33  
34  
35  
36  
37  
38  
39  
40  
41  
42  
43  
44  
45  
46  
47  
48  
49  
50  
51  
52  
53  
54  
55  
56  
57  
58  
59  
60

For peer review only

BMJ OPEN

## REFERENCES

1. Roth GA, Johnson C, Abajobir A, et al. Global, Regional, and National Burden of Cardiovascular Diseases for 10 Causes, 1990 to 2015. *J Am Coll Cardiol* 2017;70(1):1-25. doi: 10.1016/j.jacc.2017.04.052
2. Organization WH. Global Update on HIV Treatment 2013: Results, Impact and Opportunities. WHO Report. Kuala Lumpur, Malaysia, 2013.
3. Macro NSONal. Malawi Demographic and Health Survey 2010. Zomba, Malawi, and Calverton, Maryland, USA: NSO and ICF Macro, 2010.
4. Freiberg MS, Chang CC, Kuller LH, et al. HIV infection and the risk of acute myocardial infarction. *JAMA Intern Med* 2013;173(8):614-22. doi: 10.1001/jamainternmed.2013.3728  
1659742 [pii] [published Online First: 2013/03/06]
5. Currier JS, Lundgren JD, Carr A, et al. Epidemiological evidence for cardiovascular disease in HIV-infected patients and relationship to highly active antiretroviral therapy. *Circulation* 2008;118(2):e29-35. doi: 10.1161/CIRCULATIONAHA.107.189624 [published Online First: 2008/06/21]
6. Butt AA, Chang CC, Kuller L, et al. Risk of heart failure with human immunodeficiency virus in the absence of prior diagnosis of coronary heart disease. *Archives of internal medicine* 2011;171(8):737-43. doi: 10.1001/archinternmed.2011.151 [published Online First: 2011/04/27]
7. Benjamin LA, Corbett EL, Connor MD, et al. HIV, antiretroviral treatment, hypertension, and stroke in Malawian adults: A case-control study. *Neurology* 2016;86(4):324-33. doi: 10.1212/WNL.0000000000002278
8. Allain TJ, Kinley L, Tsidya B, et al. The spectrum of heart disease in adults in Malawi: A review of the literature with reference to the importance of echocardiography as a diagnostic modality. *Malawi Med J* 2016;28(2):61-65. [published Online First: 2016/11/30]
9. Soliman EZ, Juma H. Cardiac disease patterns in northern Malawi: epidemiologic transition perspective. *J Epidemiol* 2008;18(5):204-8. [published Online First: 2008/08/30]
10. Syed FF, Sani MU. Recent advances in HIV-associated cardiovascular diseases in Africa. *Heart* 2013;99(16):1146-53. doi: 10.1136/heartjnl-2012-303177 [published Online First: 2013/05/18]
11. Soliman EZ, Sharma S, Arasteh K, et al. Baseline cardiovascular risk in the INSIGHT Strategic Timing of AntiRetroviral Treatment (START) trial. *HIV Med* 2015;16 Suppl 1:46-54. doi: 10.1111/hiv.12233 [published Online First: 2015/02/26]
12. Benjamin LA, Allain TJ, Mzinganjira H, et al. The Role of Human Immunodeficiency Virus-Associated Vasculopathy in the Etiology of Stroke. *J Infect Dis* 2017;216(5):545-53. doi: 10.1093/infdis/jix340 [published Online First: 2017/09/22]
13. Benjamin LA, Bryer A, Lucas S, et al. Arterial ischemic stroke in HIV: Defining and classifying etiology for research studies. *Neurol Neuroimmunol Neuroinflamm* 2016;3(4):e254. doi: 10.1212/NXI.0000000000000254
14. Nakanjako D, Kiragga A, Ibrahim F, et al. Sub-optimal CD4 reconstitution despite viral suppression in an urban cohort on antiretroviral therapy (ART) in sub-Saharan Africa: frequency and clinical significance. *AIDS Res Ther* 2008;5:23. doi: 10.1186/1742-6405-5-23 [published Online First: 2008/10/30]
15. Pawelec G, Derhovanessian E. Role of CMV in immune senescence. *Virus Res* 2011;157(2):175-9. doi: 10.1016/j.virusres.2010.09.010 [published Online First: 2010/09/28]
16. Appay V, Sauce D. Immune activation and inflammation in HIV-1 infection: causes and consequences. *J Pathol* 2008;214(2):231-41. doi: 10.1002/path.2276 [published Online First: 2007/12/29]
17. Shaw AC, Joshi S, Greenwood H, et al. Aging of the innate immune system. *Curr Opin Immunol* 2010;22(4):507-13. doi: 10.1016/j.coi.2010.05.003 [published Online First: 2010/07/30]

## BMJ OPEN

18. Hearps AC, Angelovich TA, Jaworowski A, et al. HIV infection and aging of the innate immune system. *Sex Health* 2011;8(4):453-64. doi: 10.1071/SH11028 [published Online First: 2011/12/01]
19. Kovacs EJ, Palmer JL, Fortin CF, et al. Aging and innate immunity in the mouse: impact of intrinsic and extrinsic factors. *Trends Immunol* 2009;30(7):319-24. doi: 10.1016/j.it.2009.03.012 [published Online First: 2009/06/23]
20. Hansson GK. Inflammation, atherosclerosis, and coronary artery disease. *The New England journal of medicine* 2005;352(16):1685-95. doi: 10.1056/NEJMra043430 [published Online First: 2005/04/22]
21. Boekholdt SM, Stroes ES. The interleukin-6 pathway and atherosclerosis. *Lancet* 2012;379(9822):1176-8. doi: 10.1016/S0140-6736(12)60361-4 [published Online First: 2012/03/17]
22. Duprez DA, Neuhaus J, Kuller LH, et al. Inflammation, coagulation and cardiovascular disease in HIV-infected individuals. *PLoS one* 2012;7(9):e44454. doi: 10.1371/journal.pone.0044454 [published Online First: 2012/09/13]
23. Lundgren JD, Babiker AG, Gordin F, et al. Initiation of Antiretroviral Therapy in Early Asymptomatic HIV Infection. *N Engl J Med* 2015;373(9):795-807. doi: 10.1056/NEJMoa1506816 [published Online First: 2015/07/21]
24. Eggena MP, Barugahare B, Okello M, et al. T cell activation in HIV-seropositive Ugandans: differential associations with viral load, CD4+ T cell depletion, and coinfection. *The Journal of infectious diseases* 2005;191(5):694-701. doi: 10.1086/427516 [published Online First: 2005/02/03]
25. Mussini CL, P.; Cozzi-Lepri, A.; Lapadula, G.; Marchetti, G.; Nicastri, E.; Cingolani, A.; Lichtner, M.; Antinori, A.; Gori, A.; Monforte, A. CD4/CD8 ratio normalisation and non-AIDS-related events in individuals with HIV who achieve viral load suppression with antiretroviral therapy: an observational cohort study. *Lancet HIV* 2015;2:e98–e106.
26. Sereti I, Krebs SJ, Phanuphak N, et al. Persistent, Albeit Reduced, Chronic Inflammation in Persons Starting Antiretroviral Therapy in Acute HIV Infection. *Clin Infect Dis* 2017;64(2):124-31. doi: 10.1093/cid/ciw683 [published Online First: 2016/10/16]
27. Brunner S, Herndler-Brandstetter D, Weinberger B, et al. Persistent viral infections and immune aging. *Ageing Res Rev* 2011;10(3):362-9. doi: 10.1016/j.arr.2010.08.003 [published Online First: 2010/08/24]
28. Moss P. The emerging role of cytomegalovirus in driving immune senescence: a novel therapeutic opportunity for improving health in the elderly. *Curr Opin Immunol* 2010;22(4):529-34. doi: 10.1016/j.coi.2010.07.001 [published Online First: 2010/08/06]
29. Appay V, Rowland-Jones SL. Premature ageing of the immune system: the cause of AIDS? *Trends Immunol* 2002;23(12):580-5. [published Online First: 2002/12/05]
30. Schaftenaar E, Verjans GM, Getu S, et al. High seroprevalence of human herpesviruses in HIV-infected individuals attending primary healthcare facilities in rural South Africa. *PLoS one* 2014;9(6):e99243. doi: 10.1371/journal.pone.0099243 [published Online First: 2014/06/11]
31. Hunt PW, Martin JN, Sinclair E, et al. Valganciclovir reduces T cell activation in HIV-infected individuals with incomplete CD4+ T cell recovery on antiretroviral therapy. *J Infect Dis* 2011;203(10):1474-83. doi: 10.1093/infdis/jir060 [published Online First: 2011/04/20]
32. Corbett EL. Intensified HIV/TB prevention linking home-based HIV testing, including the option of selftesting, with HIV care. ISRCTN02004005. London: ISRCTN, 2012.
33. Roth GA, Huffman MD, Moran AE, et al. Global and regional patterns in cardiovascular mortality from 1990 to 2013. *Circulation* 2015;132(17):1667-78. doi: 10.1161/CIRCULATIONAHA.114.008720
34. Maple PA, Breuer J, Quinlivan M, et al. Comparison of a commercial Varicella Zoster glycoprotein IgG enzyme immunoassay with a reference time resolved fluorescence immunoassay (VZV TRFIA) for measuring VZV IgG in sera from pregnant women, sera sent for confirmatory

## BMJ OPEN

- 1  
2  
3 testing and pre and post vOka vaccination sera from healthcare workers. *J Clin Virol*  
4 2012;53(3):201-7. doi: 10.1016/j.jcv.2011.12.010 [published Online First: 2012/01/21]  
5  
6 35. Carlier P, Harika N, Bailly R, et al. Laboratory evaluation of the new Access (R) cytomegalovirus  
7 immunoglobulin IgM and IgG assays. *J Clin Virol* 2010;49(3):192-7. doi:  
8 10.1016/j.jcv.2010.07.024 [published Online First: 2010/08/31]  
9  
10 36. Laurent S, Cockcroft J, Van Bortel L, et al. Expert consensus document on arterial stiffness:  
11 methodological issues and clinical applications. *Eur Heart J* 2006;27(21):2588-605. doi:  
12 10.1093/eurheartj/ehl254 [published Online First: 2006/09/27]  
13  
14 37. Touboul PJ, Hennerici MG, Meairs S, et al. Mannheim carotid intima-media thickness and plaque  
15 consensus (2004-2006-2011). An update on behalf of the advisory board of the 3rd, 4th and  
16 5th watching the risk symposia, at the 13th, 15th and 20th European Stroke Conferences,  
17 Mannheim, Germany, 2004, Brussels, Belgium, 2006, and Hamburg, Germany, 2011.  
18 *Cerebrovasc Dis* 2012;34(4):290-6. doi: 10.1159/000343145  
19 000343145 [pii] [published Online First: 2012/11/07]  
20  
21 38. Serina P, Riley I, Stewart A, et al. Improving performance of the Tariff Method for assigning  
22 causes of death to verbal autopsies. *BMC Med* 2015;13:291. doi: 10.1186/s12916-015-0527-  
23 9 [published Online First: 2015/12/09]  
24  
25 39. Organization WH. Consolidated ARV guidelines 2013 [Available from:  
26 <http://www.who.int/hiv/pub/guidelines/arv2013/art/artmonitoring/en/index4.html>  
27 accessed 15 Oct 2015.  
28  
29 40. Misiri HE, Edriss A, Aalen OO, et al. Estimation of HIV incidence in Malawi from cross-sectional  
30 population-based sero-prevalence data. *Journal of the International AIDS Society*  
31 2012;15(1):14. doi: 10.1186/1758-2652-15-14 [published Online First: 2012/03/16]  
32  
33 41. MacPherson P, Houben RM, Glynn JR, et al. Pre-treatment loss to follow-up in tuberculosis  
34 patients in low- and lower-middle-income countries and high-burden countries: a systematic  
35 review and meta-analysis. *Bull World Health Organ* 2014;92(2):126-38. doi:  
36 10.2471/BLT.13.124800 [published Online First: 2014/03/14]  
37  
38 42. Walker R, Whiting D, Unwin N, et al. Stroke incidence in rural and urban Tanzania: a prospective,  
39 community-based study. *Lancet Neurol* 2010;9(8):786-92. doi: S1474-4422(10)70144-7 [pii]  
40 10.1016/S1474-4422(10)70144-7 [published Online First: 2010/07/09]  
41  
42 43. von Elm E, Altman DG, Egger M, et al. The Strengthening the Reporting of Observational Studies  
43 in Epidemiology (STROBE) Statement: guidelines for reporting observational studies.  
44 *International journal of surgery* 2014;12(12):1495-9. doi: 10.1016/j.ijsu.2014.07.013  
45 [published Online First: 2014/07/22]  
46  
47 44. Nagin DS, Jones BL, Passos VL, et al. Group-based multi-trajectory modeling. *Stat Methods Med*  
48 *Res* 2018;27(7):2015-23. doi: 10.1177/0962280216673085 [published Online First:  
49 2018/05/31]  
50  
51 45. Organization WH. Global Update on the Health Sector Response to HIV 2014. Geneva: World  
52 Health Organization, 2014.  
53  
54  
55  
56  
57  
58  
59  
60

BMJ OPEN

1  
2  
3  
4  
5  
6  
7  
8  
9  
10  
11  
12  
13  
14  
15  
16  
17  
18  
19  
20  
21  
22  
23  
24  
25  
26  
27  
28  
29  
30  
31  
32  
33  
34  
35  
36  
37  
38  
39  
40  
41  
42  
43  
44  
45  
46

**Figure 1.** Hypothetical pathway of the interplay between chronic viruses, immune activation, systemic inflammation, endothelial activation, and vasculopathy.

**Figure 2.** Outline of study design for a 36-month cohort study

peer review only

BMJ OPEN

| <b>Table 1.</b> Laboratory tests and clinical procedures in ART patients and HIV-uninfected adults |                   |          |           |           |           |           |           |
|----------------------------------------------------------------------------------------------------|-------------------|----------|-----------|-----------|-----------|-----------|-----------|
|                                                                                                    | Study Time Points |          |           |           |           |           |           |
|                                                                                                    | Baseline          | 6 months | 12 months | 18 months | 24 months | 30 months | 36 months |
| <b>Clinical Procedures</b>                                                                         |                   |          |           |           |           |           |           |
| PWV                                                                                                | X                 | X        | X         | X         | X         | X         | X         |
| CIMT                                                                                               | X                 |          |           |           | X         |           |           |
| ABPI                                                                                               | X                 | X        | X         | X         | X         | X         | X         |
| Cardiac Echo ( <i>participant sub-set</i> )                                                        | X                 |          |           |           | X         |           |           |
| ECG ( <i>participant sub-set</i> )                                                                 | X                 |          |           |           | X         |           |           |
| <b>Cardiometabolic markers</b>                                                                     |                   |          |           |           |           |           |           |
| Creatinine                                                                                         | X                 |          |           |           | X         |           |           |
| Full Blood Count                                                                                   | X                 | X        |           |           |           |           |           |
| Cholesterol (LDL, HDL, Triglycerides)                                                              | X                 |          |           |           | X         |           |           |
| Serum glucose/HBA1C                                                                                | X                 |          |           |           | X         |           |           |
| <b>HIV Infection and Progression</b>                                                               |                   |          |           |           |           |           |           |
| HIV viral load ( <i>HIV patients</i> )                                                             | X                 | X        | X         |           |           |           |           |
| CD4 count ( <i>HIV patients</i> )                                                                  | X                 | X        | X         |           |           |           |           |
| HIV rapid test ( <i>controls</i> )                                                                 | X                 |          | X         |           | X         |           | X         |
| <b>Immune dysregulation</b>                                                                        |                   |          |           |           |           |           |           |
| Soluble markers of systemic inflammation                                                           | X                 | X        | X         |           |           |           |           |
| Soluble markers of endothelial activation                                                          | X                 | X        | X         |           |           |           |           |
| CD8 and CD4 T-cell activation and senescence ( <i>participant subset</i> )                         | X                 | X        | X         |           | X         |           | X         |
| Monocyte/ Macrophage activation and senescence ( <i>participant subset</i> )                       | X                 | X        | X         |           | X         |           | X         |
| <b>Herpesviruses infection</b>                                                                     |                   |          |           |           |           |           |           |
| CMV IgG                                                                                            | X                 | X        |           |           |           |           |           |
| VZV IgG                                                                                            | X                 | X        |           |           |           |           |           |

**Table 2: Case definitions of primary and secondary endpoints for the study**

| Type                                                                          | Definitions                                                                                                                                                                                                                                                                                                                                                                                                                                                                                                                                                                                                                                                                                                                                                                                                                                                                                                                                                                                  |
|-------------------------------------------------------------------------------|----------------------------------------------------------------------------------------------------------------------------------------------------------------------------------------------------------------------------------------------------------------------------------------------------------------------------------------------------------------------------------------------------------------------------------------------------------------------------------------------------------------------------------------------------------------------------------------------------------------------------------------------------------------------------------------------------------------------------------------------------------------------------------------------------------------------------------------------------------------------------------------------------------------------------------------------------------------------------------------------|
| <p><b>Primary Endpoint</b></p> <p>Carotid intimal medial thickness (CIMT)</p> | <p>The occurrence of new-onset vasculopathy [CIMT – a measure of atherosclerosis]: CIMT &gt;0.9 mm or &gt;75<sup>th</sup> percentile of age/sex references values or presence of plaque on the carotid scan</p> <p><u>Progression</u>: total change in CIMT at 24 months from baseline</p>                                                                                                                                                                                                                                                                                                                                                                                                                                                                                                                                                                                                                                                                                                   |
| <p>Pulse wave velocity (PWV)</p>                                              | <p>Occurrence of new onset vasculopathy [PWV – a measure of arterial stiffness]: PWV &gt;12[m/s]</p> <p><u>Progression</u>: total change in PWV at 24 months from baseline</p>                                                                                                                                                                                                                                                                                                                                                                                                                                                                                                                                                                                                                                                                                                                                                                                                               |
| <p><b>Secondary endpoint</b></p> <p>Stroke</p>                                | <p><b>Confirmed (1+2) or 3 or 4 or 5:</b></p> <ol style="list-style-type: none"> <li>1. Acute onset with a clinically compatible course, including unequivocal objective findings of a localizing neurologic deficit</li> <li>2. CT or MRI compatible with a diagnosis of stroke and current neurologic signs and symptoms</li> <li>3. Stroke diagnosed as the cause of death at autopsy</li> <li>4. Compatible clinical history and positive lumbar puncture compatible with subarachnoid hemorrhage</li> <li>5. Death certificate or death note from medical record listing stroke as the cause of death</li> </ol>                                                                                                                                                                                                                                                                                                                                                                        |
| <p>Myocardial Infarction [MI]</p>                                             | <p><b>Confirmed: One of the following 5 criteria (adapted from 2007 Universal Definition of Myocardial Infarction): [1 + (2 or 3 or 6)] or 4 or 5</b></p> <ol style="list-style-type: none"> <li>1. Rise and/or fall of cardiac biomarkers (preferably troponin), with at least one value above the 99th percentile of upper reference limit (URL);</li> <li>2. The occurrence of a compatible clinical syndrome, including symptoms consistent with myocardial ischemia;</li> <li>3. ECG changes indicative of new ischemia (new ST-changes or new left bundle branch block [LBBB]), or development of pathological Q waves on the ECG;</li> <li>4. Sudden unexpected cardiac death involving cardiac arrest before biomarkers are obtained or before a time when biomarkers appear, along with (a) new ST-changes or new LBB, or (b) evidence of fresh thrombus on coronary angiography or at autopsy</li> <li>5. Pathologic findings of acute myocardial infarction (including</li> </ol> |



## BMJ OPEN

|  |                                                  |                                                                                                                                                                                                                                                                                                                                                                                                                                                                                             |
|--|--------------------------------------------------|---------------------------------------------------------------------------------------------------------------------------------------------------------------------------------------------------------------------------------------------------------------------------------------------------------------------------------------------------------------------------------------------------------------------------------------------------------------------------------------------|
|  |                                                  | acute MI demonstrated as the cause of death on autopsy)<br>6. Development of a) evolving new Q waves, or b) evolving ST elevation, preferably based on at least 2 ECGs taken during the same hospital admission                                                                                                                                                                                                                                                                             |
|  | Coronary artery disease requiring drug treatment | <b>Confirmed (1 or 2) + 3:</b><br>1. Evidence of myocardial ischemia based on either diagnostic imaging (such as a stress echocardiogram or thallium scan) or diagnostic changes on an electrocardiogram (such as during stress testing or an episode of chest pain)<br>2. Evidence of coronary artery disease based on coronary angiography or other diagnostic imaging<br>3. Use of medication given to treat or prevent angina (e.g., nitrates, beta blockers, calcium channel blockers) |
|  | Peripheral vascular disease [PVD]                | <b>Confirmed (1+2) or (1+3):</b><br>1. Compatible clinical signs and symptoms<br>2. Positive results on diagnostic imaging studies (e.g., Doppler ultrasound, contrast arteriography, MRI arteriography); 3. Ankle Brachial Pressure Index < 0.90 in non-diabetics                                                                                                                                                                                                                          |
|  | Vascular Immune reconstitution syndrome (IRIS)   | A new onset vasculopathy within 6 months of starting ART                                                                                                                                                                                                                                                                                                                                                                                                                                    |
|  | All-cause death and vascular-related deaths      | Death (of any or vascular cause) that occurs after recruitment into the study                                                                                                                                                                                                                                                                                                                                                                                                               |

BMJ OPEN

1  
2  
3  
4  
5  
6  
7  
8  
9  
10  
11  
12  
13  
14  
15  
16  
17  
18  
19  
20  
21  
22  
23  
24  
25  
26  
27  
28  
29  
30  
31  
32  
33  
34  
35  
36  
37  
38  
39  
40  
41  
42  
43  
44  
45  
46

For peer review only

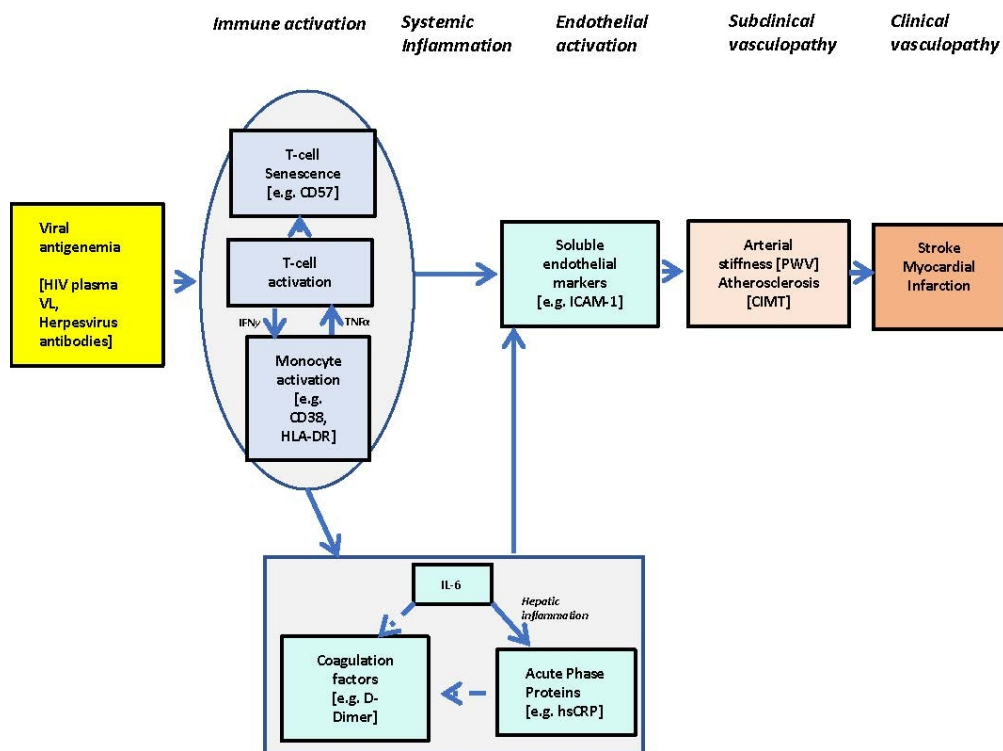

Figure 1

90x90mm (300 x 300 DPI)

1  
2  
3  
4  
5  
6  
7  
8  
9  
10  
11  
12  
13  
14  
15  
16  
17  
18  
19  
20  
21  
22  
23  
24  
25  
26  
27  
28  
29  
30  
31  
32  
33  
34  
35  
36  
37  
38  
39  
40  
41  
42  
43  
44  
45  
46  
47  
48  
49  
50  
51  
52  
53  
54  
55  
56  
57  
58  
59  
60

|          |          |          |          |          |          |        |
|----------|----------|----------|----------|----------|----------|--------|
| 35-39yrs | 40-44yrs | 45-49yrs | 50-55yrs | 55-59yrs | 60-64yrs | +65yrs |
|----------|----------|----------|----------|----------|----------|--------|

Cohorts will be frequency matched by 5-year age bands

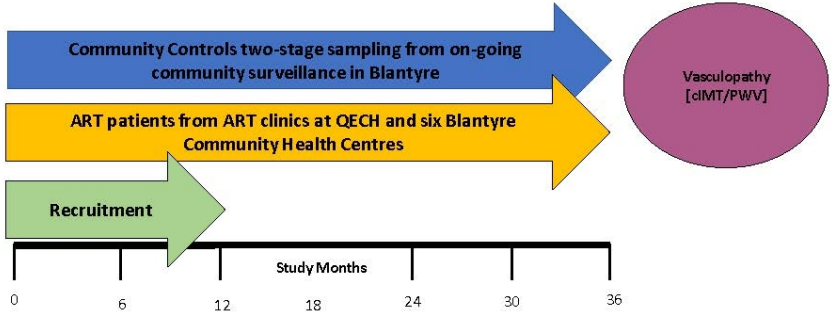

Figure 2

90x90mm (300 x 300 DPI)

# RHICCA – Clinical endpoint diagnostic criteria vs 3.5 Apr 2018

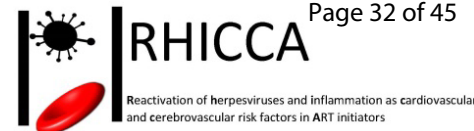

|                                           | CONFIRMED                                                                                                                                                                                                                                                                                                    | PROBABLE                                                                                                                                                                                                                                                                                                       |
|-------------------------------------------|--------------------------------------------------------------------------------------------------------------------------------------------------------------------------------------------------------------------------------------------------------------------------------------------------------------|----------------------------------------------------------------------------------------------------------------------------------------------------------------------------------------------------------------------------------------------------------------------------------------------------------------|
| <b>INFECTIONS</b>                         |                                                                                                                                                                                                                                                                                                              |                                                                                                                                                                                                                                                                                                                |
| Aspergillosis, invasive pulmonary         | <b>Confirmed: 1 + 2 + 3:</b><br>1. Compatible clinical course ( <b>Appendix 13</b> ),<br>2. CXR abnormality compatible with aspergillosis;<br>3. invasive mycelia consistent with Aspergillus on lung biopsy or positive culture of lung tissue or <b>positive culture of sputum</b> collected by any method | <b>Probable: 1 + 2 + 3:</b><br>1. Compatible clinical course ( <b>Appendix 13</b> ),<br>2. CXR abnormality compatible with aspergillosis;<br>3. invasive mycelia consistent with Aspergillus on tissue biopsy or positive culture at a normally sterile site (e.g., blood) apart from the lungs.               |
| Aspergillosis, other invasive             | <b>Confirmed: 1 + 2 + 3:</b><br>1. compatible clinical course ( <b>Appendix 11</b> ),<br>2. invasive mycelia consistent with Aspergillus on tissue biopsy or clinical evidence of infection,<br>3. positive culture from the affected tissue                                                                 | <b>Probable: 1 + 2:</b><br>1. clinical evidence of invasive infection ( <b>Appendix 11</b> ), 2. invasive mycelia consistent with Aspergillus on tissue biopsy or positive culture at a normally sterile site (e.g., blood) apart from the involved tissue                                                     |
| Bartonellosis                             | <b>Confirmed 1+ 2:</b><br>1. Clinical or histologic evidence of bacillary angiomatosis or bacillary peliosis,<br>2. a positive culture or PCR for <i>B. quintana</i> or <i>B. henselae</i>                                                                                                                   | <b>Probable 1 + 2:</b><br>1. Clinical evidence of bacillary angiomatosis or bacillary peliosis ( <b>Appendix 12</b> ),<br>2. positive silver stain for bacilli from a skin lesion or an affected organ                                                                                                         |
| Candidiasis, oral                         | <b>Confirmed: 1 + 2 + 3:</b><br>1. Macroscopic appearance on examination of the mouth<br>2. microscopic evidence of yeasts or pseudo hyphae<br>3. no evidence of oesophageal involvement                                                                                                                     | <b>Probable: 1 + 2 + 3:</b><br>1. a clinical diagnosis of oral candidiasis and/or microscopic evidence of yeasts or pseudo hyphae<br>2. clinical response to treatment<br>3. no evidence of oesophageal involvement                                                                                            |
| Candidiasis of bronchi, trachea, or lungs | <b>Confirmed: 1 + 2:</b><br>Macroscopic appearance at bronchoscopy or autopsy<br>microscopic evidence of yeasts or pseudo hyphae                                                                                                                                                                             | <b>None</b>                                                                                                                                                                                                                                                                                                    |
| Candidiasis, esophageal                   | <b>Confirmed: 1 + 2:</b><br>1. Macroscopic appearance at esophagoscopy or autopsy.<br>2. microscopic evidence of yeasts or pseudo hyphae                                                                                                                                                                     | <b>Probable: 1 + 2 + 3:</b><br>1. Recent onset of retrosternal pain or difficulty on swallowing.<br>2. a clinical diagnosis of oral candidiasis, endoscopic visualization of candidiasis and/or microscopic evidence of yeasts or pseudo hyphae from oropharyngeal mucosa<br>3. clinical response to treatment |

# RHICCA – Clinical endpoint diagnostic criteria vs 3.5 Apr 2018



|                                                 | CONFIRMED                                                                                                                                                                                                                                                                                                | PROBABLE                                                                                                                                                                                                                                                                 |
|-------------------------------------------------|----------------------------------------------------------------------------------------------------------------------------------------------------------------------------------------------------------------------------------------------------------------------------------------------------------|--------------------------------------------------------------------------------------------------------------------------------------------------------------------------------------------------------------------------------------------------------------------------|
| <b>INFECTIONS (CONTINUED)</b>                   |                                                                                                                                                                                                                                                                                                          |                                                                                                                                                                                                                                                                          |
| Cryptococcosis, extrapulmonary (not meningitis) | <b>Confirmed: 1 or 2 or 3:</b><br><br>From tissue other than lung or hilum: <ol style="list-style-type: none"> <li>microscopic demonstration of narrow based budding yeast</li> <li>positive culture,</li> <li>antigen detection</li> </ol>                                                              | None                                                                                                                                                                                                                                                                     |
| Cryptococcosis meningitis                       | <b>Confirmed: 1 or 2 or 3 or 4:</b> <ol style="list-style-type: none"> <li>Brain histopathology microscopic demonstration of narrow based budding yeast</li> <li>CSF evidence of India ink test</li> <li>CSF evidence of positive culture</li> <li>CSF evidence of positive antigen detection</li> </ol> | None                                                                                                                                                                                                                                                                     |
| Cryptosporidiosis                               | <b>Confirmed: 1 + 2</b> <ol style="list-style-type: none"> <li>Diarrhea for &gt; 1 month</li> <li>positive microscopy</li> </ol>                                                                                                                                                                         | None                                                                                                                                                                                                                                                                     |
| CMV retinitis                                   | Autopsy demonstration                                                                                                                                                                                                                                                                                    | <b>Probable 1 + 2:</b> <ol style="list-style-type: none"> <li>Typical appearance on fundoscopy of discrete patches of retinal whitening, spreading along blood vessels.</li> <li>Associated vasculitis, hemorrhage and necrosis, confirmed by ophthalmologist</li> </ol> |

|                                                | CONFIRMED                                                                                                                                                                                                                                                                                                                                | PROBABLE                                                                                                                                                                                                                                                                                     |
|------------------------------------------------|------------------------------------------------------------------------------------------------------------------------------------------------------------------------------------------------------------------------------------------------------------------------------------------------------------------------------------------|----------------------------------------------------------------------------------------------------------------------------------------------------------------------------------------------------------------------------------------------------------------------------------------------|
| <b>INFECTIONS (CONTINUED)</b>                  |                                                                                                                                                                                                                                                                                                                                          |                                                                                                                                                                                                                                                                                              |
| HZV single dermatome                           | <b>Confirmed 1+2:</b> <ol style="list-style-type: none"> <li>multiple ulcerated lesions affecting at least 1 dermatome, and/or 1 or more contiguous dermatomes;</li> <li>positive culture, PCR, or antigen assay from affected tissue</li> </ol>                                                                                         | <b>Probable 1 + 2:</b> <ol style="list-style-type: none"> <li>multiple typical ulcerated lesions affecting at Least 1 dermatome, and/or 1 or more contiguous dermatomes;</li> <li>response to an antiviral active against HZV unless resistance is demonstrated</li> </ol>                   |
| HZV, disseminated                              | <b>Confirmed 1+2:</b> <ol style="list-style-type: none"> <li>multiple ulcerated lesions affecting at least 2 non-contiguous dermatomes, or with generalized cutaneous dissemination HZV involvement of the lung, liver, brain, or other internal organs</li> <li>positive culture, PCR, or antigen assay from affected tissue</li> </ol> | <b>Probable 1+2:</b> <ol style="list-style-type: none"> <li>multiple typical ulcerated lesions affecting at least 2 non-contiguous dermatomes, or with generalized cutaneous dissemination</li> <li>response to an antiviral active against HZV unless resistance is demonstrated</li> </ol> |
| HSV mucocutaneous ulceration                   | <b>Confirmed 1 +2:</b> <ol style="list-style-type: none"> <li>Ulceration for &gt; 1 Month</li> <li>Histology, culture, PCR, or detection of antigen from affected tissue</li> </ol>                                                                                                                                                      | <b>Probable 1 + 2:</b> <ol style="list-style-type: none"> <li>Typical HSV ulceration for &gt; 1 month,</li> <li>response to an antiviral active against HZV unless resistance is demonstrated</li> </ol>                                                                                     |
| Histoplasmosis, disseminated or extrapulmonary | <b>Confirmed 1+2:</b> <ol style="list-style-type: none"> <li>Compatible symptoms,</li> <li>histology or culture or elevated blood or urine antigen levels</li> </ol>                                                                                                                                                                     | None                                                                                                                                                                                                                                                                                         |
| Isosporiasis                                   | <b>Confirmed 1 + 2:</b> <ol style="list-style-type: none"> <li>Diarrhea for &gt; 1 month</li> <li>microscopic identification of <i>Isospora belli</i></li> </ol>                                                                                                                                                                         | None                                                                                                                                                                                                                                                                                         |

# RHICCA – Clinical endpoint diagnostic criteria vs 3.5 Apr 2018

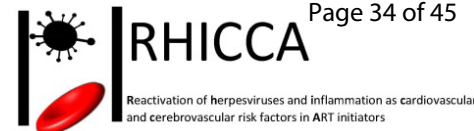

|                                                   |                                                                                                                                                                |                                                                                                                                                                                                                       |
|---------------------------------------------------|----------------------------------------------------------------------------------------------------------------------------------------------------------------|-----------------------------------------------------------------------------------------------------------------------------------------------------------------------------------------------------------------------|
| Microsporidiosis                                  | <b>Confirmed 1 + 2:</b><br>1.Diarrhea for > 1 month<br>2.Microscopic identification of Microsporidia                                                           | None                                                                                                                                                                                                                  |
| MAC and other mycobacterial disseminated diseases | <b>Confirmed 1 + 2:</b><br>1. Fever, fatigue, anemia or diarrhea<br>2. positive culture from blood, body fluids or tissue other than pulmonary, hilar or stool | <b>Probable 1+2+3:</b><br>1. Fever, fatigue, anemia or diarrhea<br>2. <b>AFB</b> or positive direct MAC PCR in blood, body fluids or tissue other than pulmonary, hilar or stool<br>3. no concurrent non-pulmonary TB |

|                                                                 | <b>CONFIRMED</b>                                                                                                                                                            | <b>PROBABLE</b>                                                                                                                                                                                                               | <b>POSSIBLE</b>                                                                                                                                                                                                                                                                                                      |
|-----------------------------------------------------------------|-----------------------------------------------------------------------------------------------------------------------------------------------------------------------------|-------------------------------------------------------------------------------------------------------------------------------------------------------------------------------------------------------------------------------|----------------------------------------------------------------------------------------------------------------------------------------------------------------------------------------------------------------------------------------------------------------------------------------------------------------------|
| <i>M. tuberculosis</i> disease, pulmonary                       | <b>Confirmed 1+2:</b><br>1. Compatible symptoms of fever, dyspnea, cough, weight loss or fatigue<br>2. culture or PCR from <b>sputum</b> or bronchial lavage or lung tissue | <b>Probable 1+2+3+4:</b><br>1. Symptoms of fever, dyspnea, cough, weight loss or fatigue<br>2. abnormal chest X-ray,<br>3. AFBs seen in sputum or lavage or lung tissue but not grown in culture,<br>4. responds to treatment | <b>Possible 1+2+3+4:</b><br>1. Symptoms of fever, dyspnea, cough, weight loss or fatigue<br>2. abnormal chest X-ray compatible with pulmonary TB (such as upper lobe cavitation, pleural exudate)<br>3. No other etiology for pulmonary symptoms and signs identified,<br>4. Responds to anti tuberculosis treatment |
| <i>M. tuberculosis</i> disease, Extrapulmonary (not meningitis) | <b>Confirmed 1+2:</b><br>1. Compatible symptoms<br>2. culture or PCR or MTB Xpert from blood or affected tissue (i.e. pericardial, ascites, and lymph glands)               | <b>Probable 1+2+3:</b><br>1. Compatible symptoms<br>2. AFBs seen from affected tissue or blood<br>3. concurrent diagnosis of pulmonary TB or responds to treatment                                                            | <b>Possible 1+2+3:</b><br>1. Compatible symptoms<br>2. No other etiology for symptoms and signs identified<br>3. concurrent diagnosis of pulmonary TB or responds to treatment                                                                                                                                       |
| <i>M. tuberculosis</i> disease, meningitis                      | <b>Confirmed 1+2:</b><br>1. Clinical symptoms of meningism ( <b>Appendix 7</b> )<br>2. Tissue/CSF culture, or PCR, or AFB or MTB Xpert                                      | <b>Probable 1+ a score ≥12 ( Appendix: Table 2):</b><br>1. Clinical symptoms of meningism ( <b>Appendix 7</b> )<br>2. A score ≥12, based on clinical, CSF, cerebral brain imaging criteria or evidence of TB elsewhere        |                                                                                                                                                                                                                                                                                                                      |
| Nocardiosis                                                     | <b>Confirmed 1+2:</b><br>1. Clinical evidence of invasive Infection ( <b>Appendix 8</b> )<br>2. a positive culture from the affected tissue or blood                        | <b>Probable 1+2:</b><br>1. Clinical evidence of invasive Infection ( <b>Appendix 8</b> )<br>2. microscopic evidence of bronchial weakly acid fast organisms from the affected tissue                                          |                                                                                                                                                                                                                                                                                                                      |

## RHICCA – Clinical endpoint diagnostic criteria vs 3.5 Apr 2018



# RHICCA

Reactivation of herpesviruses and inflammation as cardiovascular  
and cerebrovascular risk factors in ART initiators

|                                                |                                                                                                                                                                                      |                                                                                                                                                                                                                                                                                                                                                                                                                  |
|------------------------------------------------|--------------------------------------------------------------------------------------------------------------------------------------------------------------------------------------|------------------------------------------------------------------------------------------------------------------------------------------------------------------------------------------------------------------------------------------------------------------------------------------------------------------------------------------------------------------------------------------------------------------|
| <i>Pneumocystis jirovecii</i> pulmonary        | <b>Confirmed 1+2:</b><br>1. compatible clinical syndrome<br><b>(Appendix 9)</b><br>2. microscopic or histological demonstration of <i>P. jirovecii</i> cysts in a pulmonary specimen | Probable 1+2+3+4+5<br>1. dyspnea or cough, or fever progressive over > 1 week<br>2. <b>diffuse chest x-ray abnormality</b> or, if on inhalational pentamidine, diffuse upper lung field abnormality<br>3. evidence of hypoxia<br>4. not suggestive of bacterial pneumonia (i.e., not purulent sputum or hemoptysis, no bacterial pathogen identified in blood or bronchial wash)<br>5. response to PcJ treatment |
| <i>Pneumocystis jirovecii</i> , extrapulmonary | <b>Confirmed 1+2:</b><br>1. compatible clinical syndrome<br>2. microscopic or histological demonstration of <i>P. jirovecii</i> cysts in a tissue other than pulmonary specimen      | None                                                                                                                                                                                                                                                                                                                                                                                                             |



# RHICCA – Clinical endpoint diagnostic criteria vs 3.5 Apr 2018

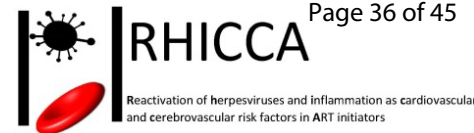

|                                                                                                                                                                                                                                                                                                  | CONFIRMED                                                                                                                                                                                                                                                                                                                                                                                                                                                                                                                                                                                                                                                                                                                                                                                                                                                                                                                 | PROBABLE                                                                                                                                                                                                                                                                                                                                                                                                                                                                                                                                                                                                                                                                              |
|--------------------------------------------------------------------------------------------------------------------------------------------------------------------------------------------------------------------------------------------------------------------------------------------------|---------------------------------------------------------------------------------------------------------------------------------------------------------------------------------------------------------------------------------------------------------------------------------------------------------------------------------------------------------------------------------------------------------------------------------------------------------------------------------------------------------------------------------------------------------------------------------------------------------------------------------------------------------------------------------------------------------------------------------------------------------------------------------------------------------------------------------------------------------------------------------------------------------------------------|---------------------------------------------------------------------------------------------------------------------------------------------------------------------------------------------------------------------------------------------------------------------------------------------------------------------------------------------------------------------------------------------------------------------------------------------------------------------------------------------------------------------------------------------------------------------------------------------------------------------------------------------------------------------------------------|
| <b>INFECTIONS (CONTINUED)</b>                                                                                                                                                                                                                                                                    |                                                                                                                                                                                                                                                                                                                                                                                                                                                                                                                                                                                                                                                                                                                                                                                                                                                                                                                           |                                                                                                                                                                                                                                                                                                                                                                                                                                                                                                                                                                                                                                                                                       |
| Pneumonia, <b>SINGLE EPISODE (isolated)</b><br>bacterial, excludes: (a) post-obstructive pneumonias, including in those with intrapulmonary/bronchial lesions, (b) aspiration pneumonia, including in those with decreased consciousness levels, (c) nosocomial ventilator-associated pneumonias | <b>Confirmed 1+2+3:</b><br>pneumonia episodes must occur after enrollment;<br>1. Signs and symptoms suggestive of bacterial pneumonia ( <b>appendix 10</b> )<br>2. Focal CXR abnormality compatible with bacterial pneumonia,<br>3. identification of a bacterial pathogen by positive blood culture, positive bronchoscopic sputum culture, detection of Legionella or pneumococcal antigen in urine or blood or diagnostic serologic findings                                                                                                                                                                                                                                                                                                                                                                                                                                                                           | <b>Probable 1+2:</b><br>pneumonia episodes must occur after enrollment;<br>1. Signs and symptoms suggestive of bacterial pneumonia ( <b>Appendix 10</b> )<br>2. Focal CXR abnormality compatible with Bacterial pneumonia                                                                                                                                                                                                                                                                                                                                                                                                                                                             |
| Pneumonia, <b>recurrent</b><br>bacterial, excludes: (a) post-obstructive pneumonias, including in those with intrapulmonary/bronchial lesions, (b) aspiration pneumonia, including in those with decreased consciousness levels, (c) nosocomial ventilator-associated pneumonias                 | <b>Confirmed 1+2+3+4+5</b><br>Second pneumonia episodes must occur after enrollment and after an isolated pneumonia, within 365 days of the first episode and with strong clinical evidence that the first episode was cured;<br>1. Signs and symptoms of second event suggestive of bacterial pneumonia ( <b>Appendix 10</b> )<br>2. Focal CXR abnormality compatible with bacterial pneumonia,<br>3. identification of a bacterial pathogen by positive blood culture, positive bronchoscopic sputum culture, detection of Legionella or pneumococcal antigen in urine or blood or diagnostic serologic findings<br>4. the second pneumonia had onset of symptoms < 365 days after the first episode<br>5. there is strong evidence that the first episode was cured such as an intervening clear CXR or absence of symptoms after > 1 month off antibacterial effective against pathogens commonly producing pneumonia | <b>Probable 1+2+3+4:</b><br>Second pneumonia episodes must occur after enrollment and after an isolated pneumonia, within 365 days of the first episode and with strong clinical evidence that the first episode was cured;<br>1. Signs and symptoms suggestive of bacterial pneumonia ( <b>Appendix 10</b> )<br>2. focal CXR abnormality compatible with bacterial pneumonia<br>3. the second pneumonia had onset of symptoms < 365 days after the first episode<br>4. there is strong evidence that the first episode was cured such as an intervening clear CXR or absence of symptoms after > 1 month off antibacterials effective against pathogens commonly producing pneumonia |
| PML (progressive multifocal leukoencephalopathy)                                                                                                                                                                                                                                                 | <b>Confirmed 1 or 2:</b><br>1. positive histology,<br>2. compatible clinical ( <b>Appendix 11</b> ) and radiologic course and positive CSF PCR for JK virus                                                                                                                                                                                                                                                                                                                                                                                                                                                                                                                                                                                                                                                                                                                                                               | <b>Probable 1+2+3:</b><br>1. Consistent symptoms ( <b>Appendix 11</b> ),<br>2. brain image consistent with PML,<br>3. no response to toxo treatment or toxoplasma                                                                                                                                                                                                                                                                                                                                                                                                                                                                                                                     |
| Salmonella blood stream infection or bacteraemia, isolated                                                                                                                                                                                                                                       | <b>Confirmed 1:</b><br>A septic episode must occur after enrollment;<br>1. Positive blood or tissue culture                                                                                                                                                                                                                                                                                                                                                                                                                                                                                                                                                                                                                                                                                                                                                                                                               | None                                                                                                                                                                                                                                                                                                                                                                                                                                                                                                                                                                                                                                                                                  |
| Salmonella blood stream infection or bacteraemia, recurrent                                                                                                                                                                                                                                      | <b>Confirmed 1:</b><br>A second septic episode must occur after enrollment and after an isolated episode;<br><br>1. Has met the criteria of isolated Salmonella septicemia<br>2. Positive blood or tissue culture on the second episode<br>3. the second septicemia had onset of symptoms < 365 days after the first episode<br>4. the second septicemia must be due to a different Salmonella serotype or there must be strong evidence that the first episode was cured such as a negative blood culture off effective antibacterials for > 1 week or absence of symptoms off antibacterials for > 1 month                                                                                                                                                                                                                                                                                                              | None                                                                                                                                                                                                                                                                                                                                                                                                                                                                                                                                                                                                                                                                                  |

# RHICCA – Clinical endpoint diagnostic criteria vs 3.5 Apr 2018



|                        |                                                                                                                                                                                                                                                                        |                                                                                                                                                                                                                                                                                                         |
|------------------------|------------------------------------------------------------------------------------------------------------------------------------------------------------------------------------------------------------------------------------------------------------------------|---------------------------------------------------------------------------------------------------------------------------------------------------------------------------------------------------------------------------------------------------------------------------------------------------------|
| Toxoplasmosis of brain | <b>Confirmed 1+2+3:</b> <ol style="list-style-type: none"> <li>Compatible clinical findings (<b>Appendix 12</b>)</li> <li>Compatible radiological findings</li> <li>Detection of T gondii in the <b>CSF</b> or <b>brain tissue</b> (i.e. microscopy or PCR)</li> </ol> | <b>Probable 1+2+3:</b> <ol style="list-style-type: none"> <li>Symptoms of focal intracranial abnormality or decreased consciousness</li> <li>brain image consistent with lesion(s) enhanced by contrast</li> <li>positive toxoplasma serology or responds to treatment clinically or by scan</li> </ol> |
|------------------------|------------------------------------------------------------------------------------------------------------------------------------------------------------------------------------------------------------------------------------------------------------------------|---------------------------------------------------------------------------------------------------------------------------------------------------------------------------------------------------------------------------------------------------------------------------------------------------------|

|                                                              | CONFIRMED                                                                                               | PROBABLE                                                                                                                                                                                                                                                                                                                                                                                                                                                                                                                           |
|--------------------------------------------------------------|---------------------------------------------------------------------------------------------------------|------------------------------------------------------------------------------------------------------------------------------------------------------------------------------------------------------------------------------------------------------------------------------------------------------------------------------------------------------------------------------------------------------------------------------------------------------------------------------------------------------------------------------------|
| <b>NEOPLASMS</b>                                             |                                                                                                         |                                                                                                                                                                                                                                                                                                                                                                                                                                                                                                                                    |
| Cervical carcinoma, invasive                                 | <b>Confirmed 1:</b> <ol style="list-style-type: none"> <li>Histology (NOT carcinoma-in-situ)</li> </ol> | None                                                                                                                                                                                                                                                                                                                                                                                                                                                                                                                               |
| Kaposi sarcoma, (mucocutaneous or visceral)                  | <b>Confirmed 1:</b> <ol style="list-style-type: none"> <li>Histology</li> </ol>                         | <ol style="list-style-type: none"> <li>Highly typical appearance</li> <li>persistence for &gt; 1 month</li> </ol>                                                                                                                                                                                                                                                                                                                                                                                                                  |
| Lymphoma, primary, of brain                                  | <b>Confirmed 1:</b> <ol style="list-style-type: none"> <li>Histology of brain tissue</li> </ol>         | <b>Probable 1+2+3:</b> <ol style="list-style-type: none"> <li>Symptoms consistent with lymphoma</li> <li>at least one CNS lesion with mass effect</li> <li>lack of clinical or radiographic response at least 2 weeks of treatment for toxoplasmosis</li> </ol>                                                                                                                                                                                                                                                                    |
| Lymphoma, Hodgkin's                                          | <ol style="list-style-type: none"> <li>Histology</li> </ol>                                             | None                                                                                                                                                                                                                                                                                                                                                                                                                                                                                                                               |
| Lymphoma, non-Hodgkin's, all cell types                      | <b>Confirmed 1:</b> <ol style="list-style-type: none"> <li>Histology</li> </ol>                         | None                                                                                                                                                                                                                                                                                                                                                                                                                                                                                                                               |
| <b>NEUROLOGICAL</b>                                          |                                                                                                         |                                                                                                                                                                                                                                                                                                                                                                                                                                                                                                                                    |
| HIV-related encephalopathy (including AIDS Dementia Complex) | None                                                                                                    | <b>Probable 1+2+3+4:</b> <ol style="list-style-type: none"> <li>Cognitive or motor dysfunction interfering with usual activity, progressive over weeks or months</li> <li>no other condition to explain the findings</li> <li>brain image obtained and suggests no other causes</li> <li>grade 2 or worse impairment in at least 2 domains by NARS (<b>appendix – table 1</b>) excluding abnormal domains at trial entry. (For persons with abnormal domains at entry worsening by at least two grades meets criteria.)</li> </ol> |

# RHICCA – Clinical endpoint diagnostic criteria vs 3.5 Apr 2018

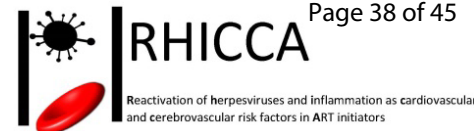

| CARDIOVASCULAR DISEASES            |                                                                                                                                                                                                                                                                                                                                                                                                                                                                                                                                                                                                                                                                                                                                                                                                                                                                                                                                                                                                                                                                                                                                                                                                                                                         |                                                                                                                                                                                                                                                                                                                                                                                                                             |
|------------------------------------|---------------------------------------------------------------------------------------------------------------------------------------------------------------------------------------------------------------------------------------------------------------------------------------------------------------------------------------------------------------------------------------------------------------------------------------------------------------------------------------------------------------------------------------------------------------------------------------------------------------------------------------------------------------------------------------------------------------------------------------------------------------------------------------------------------------------------------------------------------------------------------------------------------------------------------------------------------------------------------------------------------------------------------------------------------------------------------------------------------------------------------------------------------------------------------------------------------------------------------------------------------|-----------------------------------------------------------------------------------------------------------------------------------------------------------------------------------------------------------------------------------------------------------------------------------------------------------------------------------------------------------------------------------------------------------------------------|
| <p>Acute Myocardial Infarction</p> | <p><b>Confirmed: One of the following 5 criteria (adapted from 2007 Universal Definition of Myocardial Infarction): [1 + (2 or 3 or 6)] or 4 or 5</b></p> <ol style="list-style-type: none"> <li>1. Rise and/or fall of cardiac biomarkers (preferably troponin), with at least one value above 99th percentile of upper reference limit (URL);</li> <li>2. Occurrence of a compatible clinical syndrome, including symptoms (such as chest pain – <b>see Appendix 1</b>) consistent with myocardial ischemia;</li> <li>3. ECG changes indicative of new ischemia (new ST-changes or new left bundle branch block [LBBB]), or development of pathological Q waves on the ECG;</li> <li>4. Sudden unexpected cardiac death involving cardiac arrest before biomarkers are obtained or before a time when biomarkers appear, along with (a) new ST-changes or new LBB, or (b) evidence of fresh thrombus on coronary angiography or at autopsy</li> <li>5. Pathologic findings of acute myocardial infarction (including acute MI demonstrated as the cause of death on autopsy)</li> <li>6. Development of a) evolving new Q waves, or b) evolving ST elevation, preferably based on at least 2 ECGs taken during the same hospital admission</li> </ol> | <p><b>Probable 1 and 2:</b></p> <ol style="list-style-type: none"> <li>1. Occurrence of a compatible clinical syndrome (<b>Appendix 1</b>), including symptoms (such as chest pain) consistent with myocardial ischemia)</li> <li>2. Development of a) evolving new Q waves, or b) evolving ST elevation, preferably based on at least; ECGs taken during the same hospital admission.</li> </ol>                           |
| <p>Peripheral vascular disease</p> | <p><b>Confirmed (1+2) or (1+3):</b></p> <ol style="list-style-type: none"> <li>1. Compatible clinical signs and symptoms (<b>see Appendix 3</b>)</li> <li>2. Positive results on diagnostic imaging studies (e.g., Doppler ultrasound, contrast arteriography, MRI arteriography); 3. Ankle Brachial Pressure Index &lt; 0.90 in non-diabetics</li> </ol>                                                                                                                                                                                                                                                                                                                                                                                                                                                                                                                                                                                                                                                                                                                                                                                                                                                                                               | <p><b>Probable 1:</b></p> <ol style="list-style-type: none"> <li>1. Compatible clinical signs and symptoms (<b>see Appendix 3</b>)</li> </ol>                                                                                                                                                                                                                                                                               |
| <p>Stroke</p>                      | <p><b>Confirmed (1+2) or 3 or 4 or 5:</b></p> <ol style="list-style-type: none"> <li>1. Acute onset with a clinically compatible course, including unequivocal objective findings of a localizing neurologic deficit (<b>appendix 4</b>);</li> <li>2. CT or MRI compatible with diagnosis of stroke and current neurologic signs and symptoms</li> <li>3. Stroke diagnosed as cause of death at autopsy</li> <li>4. Compatible clinical history and positive lumbar puncture compatible with subarachnoid hemorrhage</li> <li>5. Death certificate or death note from medical record listing stroke as cause of death</li> </ol>                                                                                                                                                                                                                                                                                                                                                                                                                                                                                                                                                                                                                        | <p><b>Probable (1+2) or (1+3):</b></p> <ol style="list-style-type: none"> <li>1. Acute onset with a clinically compatible course, including unequivocal objective findings of a localizing neurologic deficit (<b>appendix 4</b>);</li> <li>2. Positive lumbar puncture compatible with subarachnoid hemorrhage</li> <li>3. Death certificate or death note from medical record listing stroke as cause of death</li> </ol> |
| <p>Congestive heart failure</p>    | <p><b>Confirmed (1+2) or (1+3) or (1+4):</b></p> <ol style="list-style-type: none"> <li>1. Clinical signs and symptoms compatible with left or right sided heart failure [<b>Appendix 5</b>] without an alternative explanation</li> <li>2. Hemodynamic measurements, radionuclide ventriculography, echocardiogram, cardiac catheterization, or multiple gated acquisition scan showing a decreased ejection fraction of &lt; 45%</li> <li>3. Echocardiogram, cardiac catheterization or other studies showing evidence of increased left atrial pressure or right heart failure;</li> <li>4. Elevated levels of Brain Natriuretic Peptide (BNP) or NT-proBNP</li> </ol>                                                                                                                                                                                                                                                                                                                                                                                                                                                                                                                                                                               | <p><b>Probable 1+2+3:</b></p> <ol style="list-style-type: none"> <li>1. Clinical signs and symptoms compatible with left or right sided heart failure [<b>Appendix 5</b>] without an alternative explanation</li> <li>2. Chest x-ray or other imaging study showing evidence of congestive heart failure, including cardiac enlargement;</li> <li>3. Documentation of treatment for congestive heart failure</li> </ol>     |

# RHICCA – Clinical endpoint diagnostic criteria vs 3.5 Apr 2018



|                                                                         |                                                                                                                                                                                                                                                                                                                                                                                                                                                                                                                                                                                                                                                                                                                              |                                                                                                                                                                                                                                                                                                                                                                                                                                                                      |
|-------------------------------------------------------------------------|------------------------------------------------------------------------------------------------------------------------------------------------------------------------------------------------------------------------------------------------------------------------------------------------------------------------------------------------------------------------------------------------------------------------------------------------------------------------------------------------------------------------------------------------------------------------------------------------------------------------------------------------------------------------------------------------------------------------------|----------------------------------------------------------------------------------------------------------------------------------------------------------------------------------------------------------------------------------------------------------------------------------------------------------------------------------------------------------------------------------------------------------------------------------------------------------------------|
| Coronary artery disease requiring drug treatment                        | <b>Confirmed (1 or 2) + 3:</b><br>1. Evidence of myocardial ischemia based on either diagnostic imaging (such as a <b>stress echocardiogram</b> or <b>thallium scan</b> ) or diagnostic changes on an electrocardiogram (such as during stress testing or an episode of chest pain)<br>2. Evidence of coronary artery disease based on <b>coronary angiography</b> or other diagnostic imaging<br>3. Use of medication given to treat or prevent angina (e.g., nitrates, beta blockers, calcium channel blockers)                                                                                                                                                                                                            | <b>Probable 1+2:</b><br>1. Other evidence of myocardial ischemia and/or coronary artery disease (including that based primarily upon symptoms and clinical presentation, such as chest pain with exertion)<br>2. Use of medication given to treat or prevent angina (e.g., nitrates, beta blockers, calcium channel blockers)                                                                                                                                        |
| Deep vein thrombosis                                                    | <b>Confirmed 1:</b><br>1. Diagnosis of deep vein thrombosis (DVT) by contrast venography, or <b>ultrasonography</b> other comparable imaging techniques;                                                                                                                                                                                                                                                                                                                                                                                                                                                                                                                                                                     | <b>Probable (1)+2+3:</b><br>1. <b>An elevated D-dimer test;</b><br>2. A score on the Wells Clinical Prediction Rule for DVT of $\geq 3$ points;<br>3. Absence of alternative diagnosis as likely or greater than that of deep venous thrombosis.<br><b>Wells Clinical Prediction Rule for DVT (Appendix 6)</b>                                                                                                                                                       |
| <b>SYSTEMIC DISEASES</b>                                                |                                                                                                                                                                                                                                                                                                                                                                                                                                                                                                                                                                                                                                                                                                                              |                                                                                                                                                                                                                                                                                                                                                                                                                                                                      |
| Anaemia<br>NOT FOR ERC<br>TO BE DETERMINED<br>RETROSPECTIVELY           | <b>Confirmed 1</b><br>Classified according to both WHO and DAIDS thresholds for severe/grade 3-4 anaemia                                                                                                                                                                                                                                                                                                                                                                                                                                                                                                                                                                                                                     |                                                                                                                                                                                                                                                                                                                                                                                                                                                                      |
| Chronic Kidney disease                                                  | <b>Confirmed: 1 or 2</b><br>1. Kidney damage for >3 months, as defined by structural or functional abnormalities of the kidney with or without decreased GRF, manifest by either;<br>- Pathological abnormalities; or<br>- Markers of kidney damage, including abnormalities in the composition of the blood or urine or abnormalities in imaging results<br>2. GFR <60mL/min/1.73m <sup>2</sup> for >3months, with or without kidney disease (estimated by <b>CKD-EPI</b> )                                                                                                                                                                                                                                                 | <b>Confirmed: 1 or 2</b><br>1. Isolated Kidney damage, as defined by structural or functional abnormalities of the kidney with or without decreased GRF, manifest by either;<br>- Pathological abnormalities; or<br>- Markers of kidney damage, including abnormalities in the composition of the blood or urine or abnormalities in imaging results<br>2. Isolated GFR <60mL/min/1.73m <sup>2</sup> , with or without kidney disease (estimated by <b>CKD-EPI</b> ) |
| End-stage renal disease                                                 | <b>Confirmed: 1</b><br>1. Hemodialysis or peritoneal dialysis documented in a clinical note for a period of at least three months;                                                                                                                                                                                                                                                                                                                                                                                                                                                                                                                                                                                           | <b>Probable: 1</b><br>1. Hemodialysis or peritoneal dialysis documented in a clinical note for a period of at least one month and up to the time of death in a patient who dies within three months after dialysis begins                                                                                                                                                                                                                                            |
| Diabetes Mellitus<br>NOT FOR ERC<br>TO BE DETERMINED<br>RETROSPECTIVELY | <b>Confirmed: 1 or 2 or 3 or 4</b><br>1. Symptoms of diabetes plus casual plasma glucose concentration $\geq 200$ mg/dL (11.1 mmol/L). (Casual is defined as any time of day without regard to time since last meal. The classic symptoms of diabetes include polyuria and polydipsia.)<br>2. Fasting plasma glucose $\geq 126$ mg/dL (7.0 mmol/L). (Fasting is defined as no caloric intake for at least 8 hours.)<br>3. 2-hour post-load glucose $\geq 200$ mg/dL (11.1 mmol/L) during an oral glucose tolerance test. (The test should be performed as described by WHO, using glucose load containing the equivalent of 75 g anhydrous glucose dissolved in water.)<br>4. An <b>HbA1c</b> of 48mmol/mol (6.5%) or above. | <b>None</b>                                                                                                                                                                                                                                                                                                                                                                                                                                                          |

# RHICCA – Clinical endpoint diagnostic criteria vs 3.5 Apr 2018

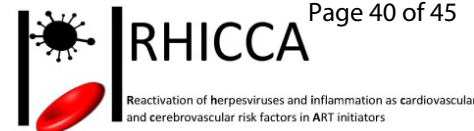

|                                                                          |                                                                                                                                                                                                                                                                                                                                                                                                                                                                                                                                                                                                                                                                                                                                                                                                                                                                                                                                                   |                                                                                                                                                                                                                                                                                                                                                                                                                                                                    |
|--------------------------------------------------------------------------|---------------------------------------------------------------------------------------------------------------------------------------------------------------------------------------------------------------------------------------------------------------------------------------------------------------------------------------------------------------------------------------------------------------------------------------------------------------------------------------------------------------------------------------------------------------------------------------------------------------------------------------------------------------------------------------------------------------------------------------------------------------------------------------------------------------------------------------------------------------------------------------------------------------------------------------------------|--------------------------------------------------------------------------------------------------------------------------------------------------------------------------------------------------------------------------------------------------------------------------------------------------------------------------------------------------------------------------------------------------------------------------------------------------------------------|
| Decompensate Liver disease                                               | <p><b>Confirmed: 1+2</b></p> <p>1. Histologic, radiographic, or ultrasound evidence of cirrhosis, as documented by one of the following:</p> <ul style="list-style-type: none"> <li>a. Histologic evidence of cirrhosis obtained by liver biopsy or autopsy</li> <li>b. MRI or CT consistent with cirrhosis</li> <li>c. A positive result on ultrasound imaging consistent with cirrhosis</li> </ul> <p>2. Clinical evidence of decompensation, as documented by one of the following, and without an alternative explanation:</p> <ul style="list-style-type: none"> <li>a. Ascites</li> <li>b. Hepatic encephalopathy</li> <li>c. Bleeding from gastric or esophageal varices</li> <li>d. Spontaneous bacterial peritonitis</li> </ul>                                                                                                                                                                                                          | <p><b>Probable: 1</b></p> <p>1. Clinical evidence of decompensation, as documented by one of the following, and without an alternative explanation:</p> <ul style="list-style-type: none"> <li>a. Ascites</li> <li>b. Hepatic encephalopathy</li> <li>c. Bleeding from gastric or esophageal varices</li> <li>d. Spontaneous bacterial peritonitis</li> </ul>                                                                                                      |
| Hypertension                                                             | <p><b>Confirmed: 1 or 2</b></p> <p>1. An average of three blood pressure (BP) readings of systolic of 140 mm Hg or above and/or diastolic of 90 mm Hg or above on the same day and persist 5-7 days after the initial reading.</p> <p>2. An isolated reading of 140mg systolic or 90mg diastolic and presence of the following end-organ disease:</p> <ul style="list-style-type: none"> <li>a. Cardiac (i.e. left ventricular hypertrophy meeting the ECG criteria [<b>Appendix 2</b>] on evidence on cardiac echocardiogram)</li> <li>b. Renal (i.e. microalbuminuria [urinary albumin excretion of 30-300mg/dl], elevated creatinine, reduced estimated GFR (60-90ml/min)</li> <li>c. Retinal(i.e. hypertensive retinal changes)</li> <li>d. Vascular disease (i.e. stroke [persisting on day 7], peripheral vascular disease, myocardial infarction, coronary artery disease requiring drug treatment, congestive cardiac failure)</li> </ul> | <p><b>Probable: 1</b></p> <p>1. An average of three BP readings of systolic of 140 mm Hg or above and/or diastolic of 90 mm Hg or above on the same day.</p>                                                                                                                                                                                                                                                                                                       |
| Hyperlipidemia<br><br>NOT FOR ERC<br>TO BE DETERMINED<br>RETROSPECTIVELY | <p><b>Confirmed: 1 or 2</b></p> <ul style="list-style-type: none"> <li>1. Fasting total cholesterol &gt;200mg/dl (&gt;5.2 mmol/L) or LDL cholesterol &gt;130mg/dl (&gt;3.4mmol/l) or Triglycerides &gt;150 mg/dl (1.7 mmol/L)</li> <li>2. Non-fasting total cholesterol &gt;240mg/dl (&gt;6.2 mmol/L) or LDL cholesterol &gt;160mg/dl (&gt;4.1 mmol/L) or Triglycerides &gt;200 mg/dl (2.3mmol/L)</li> </ul>                                                                                                                                                                                                                                                                                                                                                                                                                                                                                                                                      | <p><b>None</b></p>                                                                                                                                                                                                                                                                                                                                                                                                                                                 |
| HIV wasting syndrome                                                     | <p>None</p>                                                                                                                                                                                                                                                                                                                                                                                                                                                                                                                                                                                                                                                                                                                                                                                                                                                                                                                                       | <p><b>Probable: 1 + 2 + 3</b></p> <ul style="list-style-type: none"> <li>1. unexplained, involuntary weight loss &gt;10% from baseline,</li> <li>2. persistent diarrhea with &gt; 2 liquid stools/d for &gt; 1 month or weakness for &gt; 1 month or fever for &gt; 1 month,</li> <li>3. tests for alternate causes of weight loss, such as cancer, TB, MAC, cryptosporidiosis or other specific causes of weight loss, if obtained, should be negative</li> </ul> |

# RHICCA – Clinical endpoint diagnostic criteria vs 3.5 Apr 2018



## Appendix

1. Clinical syndrome of Myocardial infarction (a+ b +d) or (c+d)
  - a. Chest pain (with associated clamminess, pallor)
  - b. Radiation to the upper extremity and jaw
  - c. Epigastric discomfort with exertion or at rest
  - d. Severe discomfort lasting for more than 20 minutes
2. ECG criteria for LVH

Any two of the following 3 criteria's should be met:

|                                                                                                                                                                                                                                                                                                                                                                                                                                                                                                                                                                                                                                                                                                                                                                                                                                                                                                                               |                                                                              |
|-------------------------------------------------------------------------------------------------------------------------------------------------------------------------------------------------------------------------------------------------------------------------------------------------------------------------------------------------------------------------------------------------------------------------------------------------------------------------------------------------------------------------------------------------------------------------------------------------------------------------------------------------------------------------------------------------------------------------------------------------------------------------------------------------------------------------------------------------------------------------------------------------------------------------------|------------------------------------------------------------------------------|
| <p>Sokolow Lyon Criteria</p> <ul style="list-style-type: none"> <li>• S in V<sub>1</sub> or V<sub>2</sub> + R in V<sub>5</sub> or V<sub>6</sub> (whichever is larger) ≥ 35 mm (≥ 7 large squares)</li> <li>• R in aVL ≥ 11 mm</li> </ul> <p><b>Meets all of Sokolow Lyon criteria to be diagnostic</b></p>                                                                                                                                                                                                                                                                                                                                                                                                                                                                                                                                                                                                                    |                                                                              |
| <p>Cornell voltage criteria</p> <p>ECG diagnosis of LVH involve measurement of the sum of the R wave in lead aVL and the S wave in lead V<sub>3</sub>. The Cornell criteria for LVH are:</p> <ul style="list-style-type: none"> <li>• S in V<sub>3</sub> + R in aVL &gt; 28 mm (men)</li> <li>• S in V<sub>3</sub> + R in aVL &gt; 20 mm (women)</li> </ul> <p><b>Meets all of Cornell voltage criteria to be diagnostic</b></p>                                                                                                                                                                                                                                                                                                                                                                                                                                                                                              |                                                                              |
| <p>Romhilt-Estes point score system ECG Criteria</p> <p>Voltage Criteria (any of):</p> <ol style="list-style-type: none"> <li>1. R or S in limb leads ≥20 mm</li> <li>2. S in V<sub>1</sub> or V<sub>2</sub> ≥30 mm</li> <li>3. R in V<sub>5</sub> or V<sub>6</sub> ≥30 mm</li> </ol> <p>-----</p> <p>ST-T Abnormalities:</p> <ol style="list-style-type: none"> <li>1. ST-T vector opposite to QRS without digitalis</li> <li>2. ST-T vector opposite to QRS with digitalis</li> <li>3. Negative terminal P mode in V<sub>1</sub> 1 mm in depth and 0.04 sec in duration (indicates <a href="#">left atrial enlargement</a>)</li> <li>4. Left axis deviation (QRS of -30° or more)</li> <li>5. QRS duration ≥0.09 sec</li> <li>6. Delayed R wave peak time (<a href="#">intrinsicoid deflection</a>) in V<sub>5</sub> or V<sub>6</sub> (&gt;0.05 sec)</li> </ol> <p><b>Romhilt-Estes point score &gt;4 is diagnostic</b></p> | <p>Points</p> <p>3</p> <p>3</p> <p>1</p> <p>3</p> <p>2</p> <p>1</p> <p>1</p> |

3. Clinical syndrome of Peripheral vascular disease (a+ (b or c or d)
  - a. Painful cramping in the hip, thigh or calf muscles after certain activities, such as walking or climbing stairs (claudication)
  - b. femoral bruit
  - c. decreased peripheral pulses
  - d. change in color or temperature of limb suggesting peripheral arterial disease



## RHICCA – Clinical endpoint diagnostic criteria vs 3.5 Apr 2018

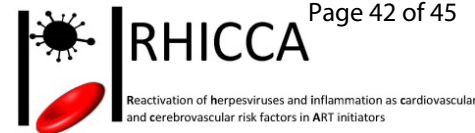

### 4. Clinical syndrome of stroke; should meet the 3 criteria's;

|                                                                                                                                     |                                                                                                                                                                                                                                                                                                                                                                                                                                                                                                                                                                                                                                                                                                                                                                              |
|-------------------------------------------------------------------------------------------------------------------------------------|------------------------------------------------------------------------------------------------------------------------------------------------------------------------------------------------------------------------------------------------------------------------------------------------------------------------------------------------------------------------------------------------------------------------------------------------------------------------------------------------------------------------------------------------------------------------------------------------------------------------------------------------------------------------------------------------------------------------------------------------------------------------------|
| 1. <b>Sudden onset</b>                                                                                                              |                                                                                                                                                                                                                                                                                                                                                                                                                                                                                                                                                                                                                                                                                                                                                                              |
| 2. <b>Focal deficit</b> (or global disturbance but not seizures)                                                                    | <p><b>Large artery disease (anterior circulation syndrome)</b><br/>Hemi-paresis + Hemi-sensory loss + higher cortical dysfunction (gaze paresis, language impairment [expression + comprehension], visual field defect, hemi-neglect)</p> <p><b>Large artery disease (posterior circulation syndrome)</b><br/>Vertigo, visual field defect, gaze paresis, double vision, swallowing difficulty, crossed signs [contralateral limb weakness and ipsilateral cranial nerves abnormality], ataxic limb and gait, drowsy/loss of consciousness</p> <p><b>Small vessel disease (lacunar syndrome)</b><br/>Pure hemi-sensory loss<br/>Pure hemiparesis<br/>Pure sensorimotor<br/>Pure ataxic hemiparesis (including dysarthria-clumsy hand syndrome)<br/>Thunderclap headache*</p> |
| 3. <b>Lasting &gt; 24 hours</b> (<24 hours is a TIA)                                                                                |                                                                                                                                                                                                                                                                                                                                                                                                                                                                                                                                                                                                                                                                                                                                                                              |
| *seen in those with a suspicion of subarachnoid or venous stroke. In this case criteria 1 and 3 does not necessarily have to be met |                                                                                                                                                                                                                                                                                                                                                                                                                                                                                                                                                                                                                                                                                                                                                                              |

### 5. Clinical syndrome of congestive heart failure:

Using the Framingham criteria relies on clinical signs and symptoms; 1 or more major and two or more minor criteria are clinically suggestive of heart failure:

#### *Major criteria*

- A. Acute pulmonary edema
- B. Cardiomegaly
- C. Hepatojugular reflex
- D. Neck vein distention
- E. Paroxysmal nocturnal **Dyspnea** or **Orthopnea**
- F. Pulmonary crackles
- G. **Third Heart Sound (S3 Gallup Rhythm)**

#### *Minor Criteria*

- A. **Ankle edema**
- B. **Dyspnea** on exertion
- C. **Hepatomegaly**
- D. Nocturnal cough
- E. **Pleural Effusion**
- F. **Tachycardia (Heart Rate >120 beats per minute)**

## RHICCA – Clinical endpoint diagnostic criteria vs 3.5 Apr 2018



### 6. Wells Clinical Prediction Rule for DVT (Adapted from: Wells PS et al. Lancet 1997;350:1796).

One point for each of the following:

- Active cancer (treatment ongoing or within previous 6 months, or palliative)
- Paralysis, paresis, or plaster immobilization of lower extremities
- Recently bedridden for more than 3 days, or major surgery, within 4 weeks
- Localized tenderness along distribution of the deep venous system
- Entire leg swollen
- Calf swelling by more than 3 cm when compared with the asymptomatic leg (measured 10 cm below tibial tuberosity)
- Pitting edema (greater in the symptomatic leg)
- Collateral superficial veins (non-varicose)

### 7. Clinical symptoms of meningism

Meningism is the triad of nuchal **rigidity** (neck stiffness), **photophobia** (intolerance of bright light) and **headache**.

### 8. Clinical symptoms of nocardia

Symptoms vary and depend on the organs involved.

If in the lungs, symptoms may include:

- Chest pain when breathing (may occur suddenly or slowly)
- Coughing up blood
- Fevers
- Night sweats
- Weight loss

If in the brain, symptoms may include:

- Fever
- Headache
- Seizures
- If the skin is affected, symptoms may include:
  - Skin breakdown
  - Skin breakdown and abnormal passage or draining tract ([fistula](#))
  - Ulcers or nodules with infection sometimes spreading along lymph nodes

Some people with nocardia infection have no symptoms.

### 9. Symptoms of Pneumocystis Pneumonia

- Fever.
- Mild and dry cough or wheezing.
- Shortness of breath, especially with activity.
- Rapid breathing.
- Fatigue.
- Major weight loss.
- Chest pain when you breathe.

### 10. Clinical syndrome of bacterial pneumonia

- cough with thick yellow, green, or blood-tinged mucus.
- chest pain that worsens when coughing or breathing.
- sudden onset of chills.
- fever of 102°F or above (fever lower than 102°F in older persons)
- headache.
- muscle pain
- breathlessness or rapid breathing.



## RHICCA – Clinical endpoint diagnostic criteria vs 3.5 Apr 2018

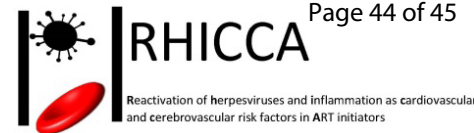

### 11. Clinical finding of Central Nervous System PML

- Deficits in motor function, especially **weakness** and **clumsiness**, are common
- associated altered mental state or behaviour and fever

### 12. Clinical finding of CNS toxoplasmosis

- Headaches
- Seizures
- Focal neurological deficit of a subacute onset
- confusion and coma
- A lung infection, causing cough, fever, and shortness of breath may co-exist.
- 

### 13. Clinical symptoms suggest of Aspergillosis;

- Fever and chills.
- Cough that brings up blood-streaked sputum (hemoptysis)
- Severe bleeding from the lungs.
- Shortness of breath.
- Chest or joint pain.
- Headaches or eye symptoms.
- Nosebleed
- Facial swelling on one side

**Table 1: Abbreviated NARS (Neuropsychiatric AIDS Rating Scale) Grading for HIV Encephalopathy**

Adapted from: Price RW, Brew BJ. The AIDS dementia complex. J Infect Dis 1988; 158 (5): 1079-83, and Hughes CP, Berg L, Danziger WL. A new clinical scale for the staging of dementia. Brit J Psych 1982; 140: 566-92.

| NARS stage | Cognitive-Behavioral Domains                          |                                                     |                                                     |                                                |                                                            |                                               |
|------------|-------------------------------------------------------|-----------------------------------------------------|-----------------------------------------------------|------------------------------------------------|------------------------------------------------------------|-----------------------------------------------|
|            | Orientation                                           | Memory                                              | Motor                                               | Behavior                                       | Problem solving                                            | Activities of daily living                    |
| 0.5        | fully oriented                                        | complains of memory problems                        | fully ambulatory slightly slowed movements          | normal                                         | has slight mental slowing                                  | slight impairment in business dealings        |
| 1          | fully oriented, may have brief periods of "spaciness" | mild memory problems                                | balance, co-ordination and handwriting difficulties | more irritable, labile or apathetic, withdrawn | difficulty planning and completing work                    | can do simple daily tasks, may need prompting |
| 2          | some disorientation                                   | memory moderately impaired, new learning impaired   | ambulatory but may require walking aid              | some impulsivity or agitated behavior          | severe impairment, poor social judgement, gets lost easily | needs assistance with ADLs                    |
| 3          | frequent disorientation                               | severe memory loss, only fragments of memory remain | ambulatory with assistance                          | may have organic psychosis                     | judgement very poor                                        | cannot live independently                     |
| 4          | confused and disoriented                              | virtually no memory                                 | bedridden                                           | mute and unresponsive                          | no problem solving ability                                 | nearly vegetative                             |

# RHICCA – Clinical endpoint diagnostic criteria vs 3.5 Apr 2018

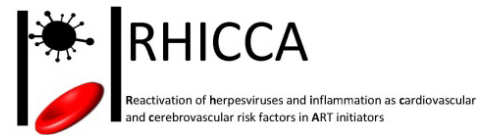

1  
2  
3  
4  
5  
6  
7  
8  
9  
10  
11  
12  
13  
14  
15  
16  
17  
18  
19  
20  
21  
22  
23  
24  
25  
26  
27  
28  
29  
30  
31  
32  
33  
34  
35  
36  
37  
38  
39  
40  
41  
42  
43  
44  
45  
46  
47  
48  
49  
50  
51  
52  
53  
54  
55  
56  
57  
58  
59  
60

For peer review only

# RHICCA – Clinical endpoint diagnostic criteria vs 3.5 Apr 2018

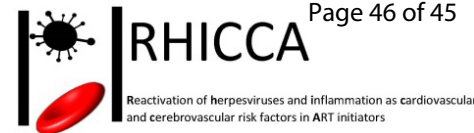

**Table 2: Diagnostic criteria for classification of definite, probable, possible, and not tuberculosis meningitis (Marais S, et al. Lancet Infect Dis 2010)**

|                                                                                                                                                                                                                                                                                                                                                                                                                                                                                                                                                                                                                                                                                                                        | Diagnostic score<br>(Maximum category score=6) |
|------------------------------------------------------------------------------------------------------------------------------------------------------------------------------------------------------------------------------------------------------------------------------------------------------------------------------------------------------------------------------------------------------------------------------------------------------------------------------------------------------------------------------------------------------------------------------------------------------------------------------------------------------------------------------------------------------------------------|------------------------------------------------|
| <b>Clinical criteria</b>                                                                                                                                                                                                                                                                                                                                                                                                                                                                                                                                                                                                                                                                                               | (Maximum category score=6)                     |
| Symptom duration of more than 5 days                                                                                                                                                                                                                                                                                                                                                                                                                                                                                                                                                                                                                                                                                   | 4                                              |
| Systemic symptoms suggestive of tuberculosis (one or more of the following): weight loss (or poor weight gain in children), night sweats, or persistent cough for more than 2 weeks                                                                                                                                                                                                                                                                                                                                                                                                                                                                                                                                    | 2                                              |
| History of recent (within past year) close contact with an individual with pulmonary tuberculosis or a positive TST or IGRAs (only in children <10 years of age)                                                                                                                                                                                                                                                                                                                                                                                                                                                                                                                                                       | 2                                              |
| Focal neurological deficit (excluding cranial nerve palsies)                                                                                                                                                                                                                                                                                                                                                                                                                                                                                                                                                                                                                                                           | 1                                              |
| Cranial nerve palsy                                                                                                                                                                                                                                                                                                                                                                                                                                                                                                                                                                                                                                                                                                    | 1                                              |
| Altered consciousness                                                                                                                                                                                                                                                                                                                                                                                                                                                                                                                                                                                                                                                                                                  | 1                                              |
| <b>CSF criteria</b>                                                                                                                                                                                                                                                                                                                                                                                                                                                                                                                                                                                                                                                                                                    | (Maximum category score=4)                     |
| Clear appearance                                                                                                                                                                                                                                                                                                                                                                                                                                                                                                                                                                                                                                                                                                       | 1                                              |
| Cells: 10–500 per $\mu$ l                                                                                                                                                                                                                                                                                                                                                                                                                                                                                                                                                                                                                                                                                              | 1                                              |
| Lymphocytic predominance (>50%)                                                                                                                                                                                                                                                                                                                                                                                                                                                                                                                                                                                                                                                                                        | 1                                              |
| Protein concentration greater than 1 g/L                                                                                                                                                                                                                                                                                                                                                                                                                                                                                                                                                                                                                                                                               | 1                                              |
| CSF to plasma glucose ratio of less than 50% or an absolute CSF glucose concentration less than 2.2mmol/L                                                                                                                                                                                                                                                                                                                                                                                                                                                                                                                                                                                                              | 1                                              |
| <b>Cerebral imaging criteria</b>                                                                                                                                                                                                                                                                                                                                                                                                                                                                                                                                                                                                                                                                                       | (Maximum category score=6)                     |
| Hydrocephalus                                                                                                                                                                                                                                                                                                                                                                                                                                                                                                                                                                                                                                                                                                          | 1                                              |
| Basal meningeal enhancement                                                                                                                                                                                                                                                                                                                                                                                                                                                                                                                                                                                                                                                                                            | 2                                              |
| Tuberculoma                                                                                                                                                                                                                                                                                                                                                                                                                                                                                                                                                                                                                                                                                                            | 2                                              |
| Infarct                                                                                                                                                                                                                                                                                                                                                                                                                                                                                                                                                                                                                                                                                                                | 1                                              |
| Pre-contrast basal hyperdensity                                                                                                                                                                                                                                                                                                                                                                                                                                                                                                                                                                                                                                                                                        | 2                                              |
| Evidence of tuberculosis elsewhere                                                                                                                                                                                                                                                                                                                                                                                                                                                                                                                                                                                                                                                                                     | (Maximum category score=4)                     |
| <b>Chest radiograph</b> suggestive of active tuberculosis: signs of tuberculosis=2; miliary tuberculosis=4                                                                                                                                                                                                                                                                                                                                                                                                                                                                                                                                                                                                             | 2/4                                            |
| <b>CT/ MRI/ ultrasound</b> evidence for tuberculosis outside the CNS                                                                                                                                                                                                                                                                                                                                                                                                                                                                                                                                                                                                                                                   | 2                                              |
| <b>AFB</b> identified or <i>Mycobacterium tuberculosis</i> cultured from another source—ie, sputum, lymph node, gastric washing, urine, blood culture                                                                                                                                                                                                                                                                                                                                                                                                                                                                                                                                                                  | 4                                              |
| Positive commercial <i>M tuberculosis</i> NAAT from extra-neural specimen                                                                                                                                                                                                                                                                                                                                                                                                                                                                                                                                                                                                                                              | 4                                              |
| <b>Exclusion of alternative diagnoses</b>                                                                                                                                                                                                                                                                                                                                                                                                                                                                                                                                                                                                                                                                              |                                                |
| An alternative diagnosis must be confirmed microbiologically (by stain, culture, or NAAT when appropriate), serologically (eg, syphilis), or histopathologically (eg, lymphoma). The list of alternative diagnoses that should be considered, dependent upon age, immune status, and geographical region, include: pyogenic bacterial meningitis, cryptococcal meningitis, syphilitic meningitis, viral meningo-encephalitis, cerebral malaria, parasitic or eosinophilic meningitis ( <i>Angiostrongylus cantonesis</i> , <i>Gnathostoma spinigerum</i> , toxocariasis, cysticercosis), cerebral toxoplasmosis and bacterial brain abscess (space-occupying Lesion on cerebral imaging) and malignancy (eg, lymphoma) |                                                |
| TST=tuberculin skin test. IGRAs=interferon-gamma release assay. NAAT=nucleic acid amplification test. AFB=acid-fast bacilli. The individual points for each criterion (one, two, or four points) were determined by consensus and by considering their quantified diagnostic value as defined in studies.                                                                                                                                                                                                                                                                                                                                                                                                              |                                                |

**Key:**

**Bold text:** of the options available likely to be the only tool available in a Malawi setting

**Greyed out text:** ideal investigation but not available in a Malawi setting <http://www.bmjopen.com/site/about/guidelines.xhtml>

# BMJ Open

**Protocol for a longitudinal cohort study to evaluate the reactivation of herpesviruses and inflammation as cardiovascular and cerebrovascular risk factors in antiretroviral therapy initiators, in an African HIV-infected population (RHICCA)**

|                                 |                                                                                                                                                                                                                                                                                                                                                                                                                                                                                                                                                                                                                                                                                                                                                                                                                                                                                                                                                                                                                                                                                                                                                                                                                                                                                                                                                                                                                                                                                                                                       |
|---------------------------------|---------------------------------------------------------------------------------------------------------------------------------------------------------------------------------------------------------------------------------------------------------------------------------------------------------------------------------------------------------------------------------------------------------------------------------------------------------------------------------------------------------------------------------------------------------------------------------------------------------------------------------------------------------------------------------------------------------------------------------------------------------------------------------------------------------------------------------------------------------------------------------------------------------------------------------------------------------------------------------------------------------------------------------------------------------------------------------------------------------------------------------------------------------------------------------------------------------------------------------------------------------------------------------------------------------------------------------------------------------------------------------------------------------------------------------------------------------------------------------------------------------------------------------------|
| Journal:                        | <i>BMJ Open</i>                                                                                                                                                                                                                                                                                                                                                                                                                                                                                                                                                                                                                                                                                                                                                                                                                                                                                                                                                                                                                                                                                                                                                                                                                                                                                                                                                                                                                                                                                                                       |
| Manuscript ID                   | bmjopen-2018-025576.R3                                                                                                                                                                                                                                                                                                                                                                                                                                                                                                                                                                                                                                                                                                                                                                                                                                                                                                                                                                                                                                                                                                                                                                                                                                                                                                                                                                                                                                                                                                                |
| Article Type:                   | Protocol                                                                                                                                                                                                                                                                                                                                                                                                                                                                                                                                                                                                                                                                                                                                                                                                                                                                                                                                                                                                                                                                                                                                                                                                                                                                                                                                                                                                                                                                                                                              |
| Date Submitted by the Author:   | 26-Jul-2019                                                                                                                                                                                                                                                                                                                                                                                                                                                                                                                                                                                                                                                                                                                                                                                                                                                                                                                                                                                                                                                                                                                                                                                                                                                                                                                                                                                                                                                                                                                           |
| Complete List of Authors:       | Peterson, Ingrid; Liverpool School of Tropical Medicine; Malawi Liverpool Wellcome Trust Clinical Research Programme<br>Ntsui, Ntobeko; University of Cape Town<br>Jambo, Kondwani; Liverpool School of Tropical Medicine; Malawi Liverpool Wellcome Trust Clinical Research Programme<br>Kelly, Christine; Malawi Liverpool Wellcome Trust Clinical Research Programme; University College Dublin<br>Huwa, Jacqueline; Malawi Liverpool Wellcome Trust Clinical Research Programme<br>Afran, Louise; Malawi Liverpool Wellcome Trust Clinical Research Programme<br>Tatuene, Joseph; University of Liverpool, Institute of Infection and Global Health; Malawi-Liverpool-Wellcome Trust Clinical Research Programme,<br>Pett, Sarah; University College London, Institute of Infection and Global Health; University of New South Wales, Kirby Institute<br>Henrion, Marc; Malawi Liverpool Wellcome Trust Clinical Research Programme; Liverpool School of Tropical Medicine<br>Van Oosterhout, Joep; University of Malawi College of Medicine; Dignitas International<br>Heyderman, Robert; University College London, Division of Infection and Immunity; University of Malawi College of Medicine, Malawi Liverpool Wellcome Trust Clinical Research Programme<br>Mwandumba, Henry; Liverpool School of Tropical Medicine; Malawi Liverpool Wellcome Trust Clinical Research Programme<br>Benjamin, Laura; University of Liverpool Institute of Infection and Global Health, ; University College London Institute of Neurology, |
| <b>Primary Subject Heading</b>: | Cardiovascular medicine                                                                                                                                                                                                                                                                                                                                                                                                                                                                                                                                                                                                                                                                                                                                                                                                                                                                                                                                                                                                                                                                                                                                                                                                                                                                                                                                                                                                                                                                                                               |
| Secondary Subject Heading:      | HIV/AIDS, Immunology (including allergy), Infectious diseases, Global health                                                                                                                                                                                                                                                                                                                                                                                                                                                                                                                                                                                                                                                                                                                                                                                                                                                                                                                                                                                                                                                                                                                                                                                                                                                                                                                                                                                                                                                          |
| Keywords:                       | Ischaemic heart disease < CARDIOLOGY, EPIDEMIOLOGY, HIV & AIDS < INFECTIOUS DISEASES, Stroke medicine < INTERNAL MEDICINE, Cardiovascular                                                                                                                                                                                                                                                                                                                                                                                                                                                                                                                                                                                                                                                                                                                                                                                                                                                                                                                                                                                                                                                                                                                                                                                                                                                                                                                                                                                             |

1  
2  
3  
4  
5  
6  
7  
8  
9  
10  
11  
12  
13  
14  
15  
16  
17  
18  
19  
20  
21  
22  
23  
24  
25  
26  
27  
28  
29  
30  
31  
32  
33  
34  
35  
36  
37  
38  
39  
40  
41  
42  
43  
44  
45  
46  
47  
48  
49  
50  
51  
52  
53  
54  
55  
56  
57  
58  
59  
60



SCHOLARONE™  
Manuscripts

1  
2  
3  
4  
5  
6  
7  
8  
9  
10  
11  
12  
13  
14  
15  
16  
17  
18  
19  
20  
21  
22  
23  
24  
25  
26  
27  
28  
29  
30  
31  
32  
33  
34  
35  
36  
37  
38  
39  
40  
41  
42  
43  
44  
45  
46  
47  
48  
49  
50  
51  
52  
53  
54  
55  
56  
57  
58  
59  
60

BMJ OPEN

**Title:** Protocol for a longitudinal cohort study to evaluate the reactivation of herpesviruses and inflammation as cardiovascular and cerebrovascular risk factors in antiretroviral therapy initiators, in an African HIV-infected population (RHICCA)

**Authors:**

Ingrid Peterson<sup>1,2</sup>, Ntobeko Ntsui<sup>3</sup>, Kondwani C Jambo<sup>1,2</sup>, Christine Kelly<sup>1,4</sup>, Jacqueline Huwa<sup>1</sup>, Louise Afran<sup>1</sup>, Joseph Kamtchum-Tatuene<sup>5</sup>, Sarah Pett<sup>6,7,8</sup>, Marc Yves Romain Henrion<sup>1,2</sup>, Joep Van Oosterhout<sup>9,10</sup>, Robert Heyderman<sup>11</sup>, Henry C Mwandumba<sup>1,2</sup>, Laura A Benjamin<sup>4,12\*\*</sup> on behalf of the Investigators of the RHICCA study\*

**Affiliations:**

1. Malawi-Liverpool-Wellcome Trust Clinical Research Programme, University of Malawi College of Medicine
2. Department of Clinical Sciences, Liverpool School of Tropical Medicine
3. Department of Medicine, University of Cape Town
4. HIV Molecular Research Group, University College Dublin
5. Institute of Infection and Global Health, University of Liverpool
6. Institute of Global Health, University College London
7. MRC CTU at UCL, Institute of Medicine, Clinical Trials and Methodology, University College London
8. Kirby Institute, University of New South Wales, Australia
9. Dignitas International, PO Box 071, Zomba, Malawi
10. College of Medicine, University of Malawi
11. Department of Infection and Immunity, University College London
12. Department of Brain Repair and Rehabilitation, Institute of Neurology, UCL

1 BMJ OPEN  
2  
3  
4  
5

6 \*The Investigators of the RHICCA study  
7

8 Brian Angus - Oxford Centre for Clinical Tropical Medicine, University of Oxford  
9

10 Myles Connor - University of Edinburgh  
11  
12

13 Reena Dwivedi - Greater Manchester Neurosciences Centre, Salford Royal Foundation Trust  
14

15 Lewis Haddow - Institute for Global Health, University College London  
16  
17

18 Terttu Heikinheimo-Connell - Hyvinkää Hospital, Department of Neurology, University of  
19 Helsinki  
20  
21

22 Elizabeth Joekes - Liverpool School of Tropical Medicine  
23  
24

25 Vanessa Kandoole - Department of Medicine, University of Malawi College of Medicine,  
26 Blantyre  
27  
28

29 Moffat Nyrienda - MRC Research Unit, Uganda  
30  
31

32 Kennedy Malisita- Department of Medicine, Queen Elizabeth Central Hospital  
33  
34

35 Jane Mallewa- Department of Medicine, University of Malawi College of Medicine, Blantyre  
36  
37

38 Elsayed Z. Soliman - School of Medicine, Wake Forest School of Medicine  
39  
40

41 Tom Solomon - Institute of Infection and Global Health, University of Liverpool  
42  
43

44 \*\*Corresponding author  
45  
46

47 Laura Benjamin  
48  
49

50 Institute of Infection and Global Health,  
51  
52

53 Ronald Ross building,  
54  
55

56 The University of Liverpool,  
57  
58

59 L69 7BE, Liverpool,  
60  
61

United Kingdom

1  
2  
3  
4  
5  
6  
7  
8  
9  
10  
11  
12  
13  
14  
15  
16  
17  
18  
19  
20  
21  
22  
23  
24  
25  
26  
27  
28  
29  
30  
31  
32  
33  
34  
35  
36  
37  
38  
39  
40  
41  
42  
43  
44  
45  
46  
47  
48  
49  
50  
51  
52  
53  
54  
55  
56  
57  
58  
59  
60

BMJ OPEN

[l.benjamin@liverpool.ac.uk](mailto:l.benjamin@liverpool.ac.uk)

**Key words:**

Cardiovascular, cerebrovascular, HIV, herpesvirus, Immune dysregulation,

**Journal Guidance:**

Abstract word count: 299/300

Article word count: 4095 /4000

Figure/Table: 5/5



BMJ OPEN

**ABSTRACT**

**Introduction:** In Sub-Saharan Africa, rising rates of cerebrovascular and cardiovascular disease (CBD/CVD) are intersecting with an aging HIV-infected population. The widespread use of antiretroviral therapy (ART) may confer an additive risk and may not completely suppress the risk associated with HIV infection. High-quality prospective studies are needed to determine if HIV-infected patients in Africa are at increased risk of CBD/CVD and to identify factors associated with this risk. This study will test the hypothesis that immune activation and dysfunction, driven by HIV and reactivation of latent herpesvirus infections lead to increased CBD/CVD risk in Malawian adults aged  $\geq 35$  years.

**Methods and Analysis:** We will conduct a single-centre 36-month prospective cohort study in 800 HIV-infected patients initiating antiretroviral therapy (ART) and 190 HIV-uninfected controls in Blantyre, Malawi. Patients and controls will be recruited from government ART clinics and the community, respectively and will be frequency-matched by 5-year age band and sex. At baseline and follow-up visits, we will measure carotid intima thickness (CIMT), pulse wave velocity (PWV) as surrogate markers of vasculopathy, and thus CBD include /CVD risk. Our primary exposures of interest cytomegalovirus and varicella zoster reactivation, changes in HIV plasma viral load, and markers of systemic inflammation and endothelial function. Multivariable regression models will be developed to assess the study's primary hypothesis. The occurrence of clinical CBD/CVD will be assessed as secondary study endpoints. ISRCTN registry <https://doi.org/10.1186/ISRCTN42862937>.

**Ethics and dissemination:** University of Malawi College of Medicine and Liverpool School of Tropical Medicine research ethics committees approved this work. Our goal is to understand the pathogenesis of CBD/CVD among HIV cohorts on ART, in sub-Saharan Africa, and provide data to inform future interventional clinical trials. This study runs between May 2017 and August 2020. Results of the main trial will be submitted for publication in a peer-reviewed journal.

#### STRENGTHS AND LIMITATIONS

- This is one of the first large-scale studies in Sub-Saharan Africa to explore the relationship between HIV infection, latent herpesviruses, inflammation and cardiovascular and cerebrovascular diseases, immediately after starting antiretroviral therapy (ART).
- Clinical events and death will be comprehensively reviewed through an end-point review committee, using strict diagnostic criteria for events based on those used in the INSIGHT network, or validated verbal autopsy for death with limited data.
- Because of the recent roll-out of ART in asymptomatic patients, there will be an absence of ART-naïve population, limiting our ability to explore the impact of ART.
- Approximately one-third of strokes will be asymptomatic. We anticipate not capturing some of these. However, multiple cerebral infarcts without a focal neurological deficit will manifest as cognitive impairment, which we will screen for, and corroborate with MRI imaging in a small number of symptomatic cases.
- Two-thirds of myocardial infarction will be silent and could potentially be missed. In a nested group, we will use a digital electrocardiogram to evaluate this further.

BMJ OPEN

**INTRODUCTION**

The growing epidemic of cerebrovascular disease (CBD e.g. Stroke) and cardiovascular disease (CVD e.g. myocardial infarction) now intersects with the HIV epidemic<sup>1</sup>. Countries like Malawi, have an adult HIV prevalence of approximately 10%<sup>2</sup>. There is an increased life expectancy among people living with HIV, largely because of the successful scale-up of ART<sup>3</sup>. In Europe and the US, HIV is associated with a 50% increased risk of CVD compared to HIV-uninfected populations<sup>4</sup>, attributable to long-term antiretroviral therapy (ART) use and HIV *per se*<sup>4 5</sup>. HIV infection is also associated with a 1.8 fold increased risk of all-cause heart failure in US veterans<sup>6</sup>. Our recent case-control study of stroke in Malawian adults is one of several examples that demonstrates a high risk of HIV infection associated with stroke and heart disease, pointing to a considerable and unappreciated CBD/CVD risk among HIV patients, in this setting<sup>7-10</sup>.

There are reports of geographical differences in the distribution of CVD risk factors, supporting the argument that evidence derived from high-income countries cannot be applied to Sub-Saharan (SSA)<sup>11</sup>. Addressing this knowledge gap is essential to the development of clinical drug trials for primary prevention of CBD/CVD among individuals living with HIV. Vasculopathy due to accelerated atherosclerosis, arterial stiffening and vasculitis are the major mechanisms believed to underlie the CBD/CVD burden<sup>12 13</sup>. It is hypothesized that despite viral suppression, low-grade HIV virus replication and the associated host systemic inflammation are important drivers of this vasculopathy (Figure 1). In patients receiving ART, HIV antigenemia, partly resulting from HIV persistence in sanctuary sites, incomplete virologic suppression and virologic resurgence, drives the chronic immune activation observed in about 20% of ART patients in SSA<sup>14</sup>. This immune state is characterized by ongoing activation and senescence of cell-mediated immunity<sup>15 16</sup>, increased monocyte/macrophage activation, stimulation of the interleukin-6 (IL-6) pathway and production of acute phase proteins<sup>17-19</sup>. Activation of the IL-6 pathway is established with atherosclerosis<sup>20 21</sup>, and may also contribute to non-atherosclerotic vasculopathy. Inflammation alone confers a 2-fold increased risk of clinical CBD/CVD events<sup>22</sup>. The current push to introduce more effective ART regimens, and to start treatment soon after HIV diagnosis is made, may reduce inflammation and in turn, CBD/CVD risk<sup>23</sup>. However, there is

BMJ OPEN

1  
2  
3 growing evidence of chronic inflammation in HIV despite achieving the goal of therapy,  
4 which is long-term suppression (<50 copies/mL) of plasma viral load, suggesting adjunctive  
5 therapy may be required.<sup>24-26</sup>  
6  
7  
8  
9

10  
11 In addition to HIV, there is compelling evidence that reactivation of latent herpesviruses  
12 may be an important cause of vasculopathy. In HIV-uninfected elderly populations from  
13 high-income settings, latent cytomegalovirus (CMV) infection drives dysregulation of cell-  
14 mediated immunity<sup>15 27-29</sup>, not dissimilar to what's described in HIV-associated immune  
15 activation<sup>29</sup>. CMV and other viral proteins have been found in atherosclerotic plaques<sup>20</sup>.  
16  
17 Varicella-zoster virus (VZV) can directly infect the vascular endothelium to cause vasculitis  
18 and subsequent stroke and was found to be the commonest opportunistic infection  
19 (prevalence 15%) in a study of HIV-infected stroke patients in Malawi<sup>12</sup>. The  
20 seroprevalence of herpesviruses is high in SSA<sup>30</sup>, particularly in HIV-infected populations<sup>16</sup>.  
21  
22  
23  
24  
25  
26  
27  
28

29  
30 The involvement of herpesviruses in the mechanistic pathway for CBD/CVD is compelling  
31 and may offer additional therapeutic avenues, especially for CMV and VZV. However, our  
32 understanding is incomplete, and its population impact is yet to be defined. It is important  
33 to determine if, in addition to ART, there is a role for other pharmacological interventions  
34 targeting latent viral infections or downstream inflammatory pathways to reduce  
35 vasculopathy in HIV-infected patients on ART. Previous work from North America supports  
36 the potential of treating reactivated herpesviruses<sup>31</sup>. Furthermore, there are opportunities  
37 for intervention using the recently licensed Letemovir; a treatment for CMV. By focusing on  
38 HIV and Herpes viral antigenemia and immune dysregulation as mechanisms of  
39 vasculopathy, this study will identify subgroups of HIV-infected patients on ART at high risk  
40 of CBD/CVD, the timing of CBD/CVD risk in such patients, as well as potential targets for  
41 intervention.  
42  
43  
44  
45  
46  
47  
48  
49  
50  
51  
52  
53  
54  
55  
56  
57  
58  
59  
60

BMJ OPEN

## STUDY OBJECTIVES

This study will test the hypothesis that immune activation and dysfunction, driven by HIV and reactivation of latent CMV/VZV herpesvirus infections lead to increased CBD/CVD risk in adults aged  $\geq 35$  years in SSA. We will address this through the following objectives;

- 1) To determine if progression of the surrogate marker of CBD/CVD or occurrence of new-onset vasculopathy is higher in adults aged  $\geq 35$  years with HIV infection on ART compared to those without HIV.
- 2) To determine if progression of surrogate markers of CBD/CVD or occurrence of new-onset vasculopathy is higher in adults aged  $\geq 35$  years with HIV/herpes viral antigenemia or chronic immune activation compared to those without HIV/herpes viral antigenemia or chronic immune activation. Specifically, we will determine if progression of surrogate markers or new-onset vasculopathy is higher:
  - a. in ART patients with reactivated latent herpes viral infection, compared to those without reactivated latent herpes viral infection.
  - b. in ART patients with the highest 25% of markers for immune activation, inflammation or endothelial activation compared to the bottom 25%
  - c. in ART patients with incomplete virologic suppression or virologic resurgence of HIV, compared to those with suppressed HIV plasma viral load.

The secondary study objectives are to determine if viral antigenemia or chronic immune activation increase occurrence of the following clinical events: 1) stroke, 2) myocardial infarction (MI), 3) angina (excluding MI), 4) peripheral vascular disease (PVD), 5) all-cause death/vascular-related death and 6) immune reconstitution inflammatory vasculopathy.

## METHODS AND ANALYSIS

### Study design

To address objective 1, we will conduct a single-center 36-month prospective cohort study in 800 HIV-infected patients initiating ART and 190 HIV-uninfected adults aged  $\geq 35$  years. HIV-infected and HIV-uninfected participants will be frequency matched by 5-year age band and sex. On a 6-monthly basis, we will measure markers of viral infection, inflammation and endothelial function along with surrogate markers for CBD/CVD (Table 1).

1  
2  
3  
4  
5  
6  
7  
8  
9  
10  
11  
12  
13  
14  
15  
16  
17  
18  
19  
20  
21  
22  
23  
24  
25  
26  
27  
28  
29  
30  
31  
32  
33  
34  
35  
36  
37  
38  
39  
40  
41  
42  
43  
44  
45  
46  
47  
48  
49  
50  
51  
52  
53  
54  
55  
56  
57  
58  
59  
60

BMJ OPEN

### Study Setting

This study will recruit consecutive ART patients from the ART clinic of Queen Elizabeth Central Hospital (QECH), and ART clinics in several Blantyre City Community Health Centres (CHCs). These clinics collectively initiate over 100 HIV-infected patients aged  $\geq 35$  years onto ART each month. HIV-uninfected adults will be selected from pre-ART counseling sessions, and from randomly selected households in the community by two-stage random sampling (of households and individuals within households) from a previously enumerated sampling frame in the CHC catchment areas<sup>32</sup>. All study procedures will be conducted at QECH, which is located adjacent to the Malawi-Liverpool-Wellcome Trust Clinical Research Programme (MLW). QECH also hosts a 0.35T MRI imaging facility, which will contribute to characterizing our secondary endpoints.

### Study Participants

Study inclusion criteria will be: a) age  $\geq 35$  years and b) resident in Blantyre. HIV-infected patients must further be: c) ART-naïve or initiated ART  $<10$  days prior to enrolment and d) initiating standard first-line ART (in Malawi this is: Tenofovir [TDF]/Lamivudine [3TC]/Efavirenz [EFV]). Adult controls must further be: e) HIV-uninfected. Study exclusion criteria are: f) clinical history of CBD/CVD, g) pregnancy, h) critical illness or symptomatic anemia at baseline and i) enrollment in an intervention study. At the analysis stage abnormal PWV at baseline (as defined in Table 2) will be excluded for new-onset vasculopathy analysis but not for progression of vasculopathy. The same approach will be applied for baseline CIMT measurements. If the study participant becomes pregnant after recruitment, they will be withdrawn.

Justification of study inclusion and exclusion criteria is as follows; in many populations, CBD/CVD risk rises sharply from 35-years of age<sup>33</sup>, thus individuals aged 35 and older will be eligible (recruitment of participants aged 35 -39 will be limited to 15% of the study sample to avoid overrepresentation). Restricting recruitment by age will enable this study to have greater statistical power. For clarity of etiologic inference, the study will assess the risk of new-onset vasculopathy not associated with pregnancy and thus exclude patients who are pregnant or with a history of CBD/CVD. To eliminate confounding by ART regimen, patients

BMJ OPEN

1  
2  
3 must initiate on standard first-line ART (> 90% of ART patients in Blantyre do this). Critically  
4 ill patients are excluded primarily for ethical reasons.  
5  
6  
7  
8

### 9 Laboratory methods

#### 10 ***Surface immunophenotyping of peripheral blood mononuclear cells***

11  
12  
13  
14 Immunophenotyping will be used to characterize peripheral blood mononuclear cells  
15 (PBMC) isolated from blood samples of HIV-uninfected and HIV-infected ART initiators.  
16 PBMCs will be harvested by density centrifugation using lymphoprep (Axis Shield, UK).  
17 PBMCs ( $2 \times 10^6$ ) will be stained with anti-CD45 PerCP CY5.5, anti-CD3 AF700, anti-CD4 BV421,  
18 anti-CD8 PE Dazzle, anti-CD38 BV605, anti-HLA-DR APC CY7, anti-CD57 APC, anti-PD1 PE CY7,  
19 anti-CTLA4 PE, and anti-CD223 FITC (all from eBiosciences, UK) to determine the expression  
20 of these markers on the surface of T-cells. In addition, ( $2 \times 10^6$ ) PBMCs stained with anti-CD16  
21 BV421, anti-CD14 PE, anti-HLA-DR PerCP CY5.5, anti-CD45 AF700, anti-CCR2 BV605, anti-  
22 CD11b APC, anti-CX3CR1 PE Dazzle and anti-CD38 FITC (all from eBiosciences, UK) will be  
23 used for monocytes. Dead cells, CD3<sup>+</sup> T-cells, and CD56<sup>+</sup> NK cells will be excluded using:  
24 LIVE/DEAD™ Fixable Aqua Dead Cell Stain (Thermofisher, UK), anti-CD3 BV503 and anti-  
25 CD56 BV503 (eBiosciences, UK), respectively. Stained cells will be acquired on a BD LSR  
26 Fortessa flow cytometer (Becton Dickinson, USA) and data will be analyzed using FlowJo  
27 software version 10.0 (Tree Star, San Carlos, CA). For each stained sample analyzed, the  
28 median fluorescence intensity (MFI) for each parameter will be normalized to its respective  
29 unstained control.  
30  
31  
32  
33  
34  
35  
36  
37  
38  
39  
40  
41  
42  
43  
44  
45

#### 46 ***Measurement of soluble markers of immune activation using multiplex bead array***

47  
48  
49 A custom-made multiplex assay will be used to assess soluble markers of monocyte  
50 activation (CD163), systemic inflammation (Interleukin-6) and endothelial activation  
51 (Intracellular adhesion molecule 1) in plasma, isolated from blood samples of HIV-  
52 uninfected and HIV-infected ART initiators. Following isolation, plasma will be aliquoted and  
53 stored at -80°C until further use.  
54  
55  
56  
57  
58  
59  
60

BMJ OPEN

### ***Assessment of exposure to human cytomegalovirus and varicella zoster virus by ELISA***

Quantitative VIDAS CMV IgG and IgM (BioMerieux, USA) and VZV glycoprotein IgG Low-Level Enzyme Immunoassay Kit [VaccZyme™EIA], will be used to determine exposure to these viruses using a commercial enzyme-linked immunosorbent assay (ELISA) platform. These kits will detect VZV antigen to a sensitivity and specificity of 97.8% and 96.8% respectively and for CMV, 97.2% and 100% for IgG and 100% and 97.4% for IgM respectively<sup>34 35</sup>. Plasma samples from HIV-uninfected and HIV-infected ART initiators stored at -80°C following collection will be used for these assessments

### ***HIV***

HIV infection will be diagnosed using two rapid tests in parallel, EIA rapid tests (Determine HIV-1/2 [Abbott Laboratories, USA] and Uni-Gold HIV [Trinity Biotech PLC, Ireland]), will be used as a tiebreak). HIV-1 RNA levels in plasma will be measured using the Abbott Real-Time HIV-1 assay with a lower limit of detection of 150 copies/mL (Abbott Molecular, Germany), according to the manufacturer's instructions. CD4+ T-cell count measurements will be performed using BD FACS Count machine (Partec platform).

### **Procedures**

Carotid-femoral pulse wave velocity (PWV)<sup>36</sup> and carotid intima-media thickness (CIMT)<sup>37</sup> measurement will be performed in accordance with expert consensus guidelines, using a standardized study protocol on the Vicorder system (SMART Medical, UK) and Philips CX50 machine (Philips healthcare, UK) respectively. CIMT measurements will be performed by three trained operators. The intra-class correlation coefficient will be used to assess the performance of the operators against that of a certified neurosonologist prior to study commencement.



BMJ OPEN

## Outcomes

### **Primary outcomes**

Primary outcomes are the progression of surrogate markers of CBD/CVD, namely PWV and CIMT as well as the occurrence of new-onset vasculopathy defined by threshold values outlined in Table 2.

### **Secondary outcomes**

Secondary outcomes are the following clinical events: 1) stroke, 2) myocardial infarction (MI), 3) unstable angina, 4) peripheral vascular disease (PVD), 5) all-cause death/ vascular death and 6) immune reconstitution inflammatory syndrome (IRIS) vasculopathy (Table 2). Changes in PWV or endothelial activation at 6 months post ART initiation will be interpreted as a subclinical vascular IRIS event. These outcomes will be assessed through active surveillance in QECH inpatient wards for admissions of study participants. To improve capture of clinical outcomes, we will conduct brief telephone interviews with study participants about CBD/CVD symptoms and hospitalizations between study visits and facilitate unsolicited participant self-report. Clinical events and deaths in study participants will be reviewed by an independent endpoint review committee (ERC), comprising of clinicians experienced in Endpoint review. Each event will be reviewed and adjudicated by the ERC Chair and 2 ERC reviewers, using a standard set of diagnostic criteria (Table 2 and Supplement – S1). The format of reporting will be based on modifications of the [INSIGHT](#) network clinical diagnostic criteria. Deaths will be reviewed by the ERC using the CoDe approach<sup>23</sup>. For death with limited clinical data, a validated verbal autopsy will be performed to ascertain the cause<sup>38</sup>.

## Exposures

The exposure for Primary Objective 1 will be HIV status. Yearly HIV rapid tests in HIV-uninfected adults will be performed to exclude those with new HIV infections (Figure 2).

Potential confounding and mediating factors will be recorded in study participants. This will include demographic factors, lifestyle and behavioral factors (e.g. cigarette smoking and alcohol consumption), chronic co-morbidities (i.e. hypertension, diabetes), cardiometabolic,

BMJ OPEN

1  
2  
3 renal and hematological factors (i.e. full blood count, creatinine in urine and serum, body-  
4 mass-index, waist-to-hip ratio, random glucose, HbA1c, and lipid profile). Blood pressure will  
5 be measured at all study visits. Although vascular immune reconstitution inflammatory  
6 syndrome (IRIS) (Table 2) will be considered as a primary endpoint, non-vascular IRIS will be  
7 defined as a risk factor. Where feasible, we will conduct PCR tests for common causes of IRIS  
8 in blood or cerebrospinal fluid (CSF) samples. Adherence to ART and change of ART regimen  
9 will be assessed at all study visits through extraction of data from 'ART master cards'; this is  
10 a government-supported monitoring tool used by all patients on ART, in Malawi.  
11  
12  
13  
14  
15  
16  
17  
18  
19

20 For Objective 2a-2c, markers of herpes and HIV viral antigenemia and immune inflammation  
21 will be measured according to the outline in Table 1. For primary objective 2a, reactivated  
22 latent herpes viral infections will be assessed by quantification of VZV, and CMV antibodies.  
23 We will estimate the risk of atherosclerosis and arterial stiffening associated with current  
24 herpesviruses reactivation at baseline, and sustained reactivation (i.e. those that continue  
25 to have a high titer from measurement at baseline to 6 months after ART initiation).  
26 Hyperactivation of B cells may result in an expansion of polyclonal antibodies and thus an  
27 overestimation of virus-specific antibody titers. To address this issue and make appropriate  
28 adjustments for hypergammaglobulinemia we will 1) measure more than one herpesviruses  
29 and 2) measure total IgG.  
30  
31  
32  
33  
34  
35  
36  
37  
38  
39  
40

41 For primary objective 2b, markers of immune activation, inflammation, and endothelial  
42 activation will be measured (Figures 1 & Table 1). Quantitative cell surface  
43 immunophenotyping will be performed for CD4+ and CD8+ T-cell activation (e.g. HLA-DR)  
44 and senescence (e.g. CD57) in a subset of participants. In all study participants, at baseline,  
45 6, 12, months, we will measure soluble markers associated with systemic inflammation and  
46 endothelial activation.  
47  
48  
49  
50  
51  
52  
53  
54

55 For primary objective 2c, incomplete viral response and viral rebound of HIV will be  
56 measured by quantitative PCR in patients on ART.<sup>39</sup> HIV viral load will be measured in  
57 patients on ART at 0, 6 and 12 months.  
58  
59  
60

BMJ OPEN

### Data Collection Between May 2017 and August 2020

The two-stage screening will be conducted to find and recruit potential study participants. A trained field worker will first screen to assess eligibility for criteria (a)-(c) in pre-ART counseling sessions, and in individuals from randomly selected households in the community. Eligible participants will then be referred to QECH to complete screening for criteria (d)-(i) and if eligible, consented to participate in the study. At study visits, a tablet-based, standardized Open Data Kit (ODK) case report form (CRF) will be administered in one-on-one interviews by a study nurse to capture demographic and clinical data. Study data will be collected as outlined in Table 1. Daily upload of electronic data will occur with oversight from the data manager at MLW. We will collect up to 30ml of whole blood. An ACR dipstick test will be used to test for creatinine, proteinuria, and glucosuria. In a subset of participants, an electrocardiogram supported by a digital platform and echocardiogram will be performed at baseline, 6 and 24 months, as well as in any participant experiencing a clinical event suggestive of a cardiac etiology. To facilitate the retention and clinical referrals of participants, contact will be made every 3 months to assess the occurrence of clinical events. Participants who miss a scheduled study visit will be contacted by phone and/or visited at home to assess their willingness to maintain their participation and to record intervening clinical events. Recording and definitions of other clinical events, including HIV associated events will be evaluated by the ERC chair. SMS messages will be used for appointment reminders. Technical appendix, statistical code, and dataset will be made available from a data repository, after publication of our work.

### Sample Size and Statistical Analysis

The required sample size for the study's primary objectives is 800 HIV-infected patients and 190 HIV-uninfected adults using standard, normal distribution approximation sample size formulas for comparing proportions in two groups of unequal size and based on the following assumptions: **a)** 18.4% of HIV positive study participants have abnormal PWV at baseline. We will exclude these participants from analysis. The 18.4% figure is informed by our ongoing studies of vasculopathy in HIV-infected patients, where this is the percentage of participants aged  $\geq 35$  years that have a PWV ( $>12$  m/s). **b)** 20% of both HIV-infected patients and HIV-uninfected adults will be lost to follow-up, including by death and HIV

BMJ OPEN

1  
2  
3 sero-conversion<sup>40 41</sup>. **c)** The minimum relative risk (RR) of interest is 2 for Objective 1 and 1.8  
4 for Objective 2. **d)** The 24-month cumulative risk of clinically significant vasculopathy over  
5 study follow-up is 18.4% in the HIV positive group. This is based on the same study data  
6 cited in (a). **e)** For objectives 2a)-c), the exposure prevalence for each risk factor is 20%. **f)**  
7 Statistical tests will have 80% power based on a 2-sided test with;  $\alpha=0.05$ . Testing of  
8 hypotheses for the secondary outcome will be exploratory. However, we estimate 26  
9 strokes (4 mimics), an unknown number of MIs and 80 deaths occurring during the study<sup>7 42</sup>.  
10 Taken together, c), d), e) mean that, for 80% power, we assume a 24-month cumulative  
11 vasculopathy risk of 9.2% in HIV negative participants, 18.4% in all HIV infected participants,  
12 15.9% in HIV infected participants not exposed to the risk factors from objectives 2a)-c),  
13 28.6% in the HIV infected participants exposed to these risk factors.  
14  
15  
16  
17  
18  
19  
20  
21  
22  
23  
24  
25

26 The reporting of this study will be prepared in accordance with the STROBE guidelines<sup>43</sup>.  
27 Summary and descriptive statistics will be tabulated for all primary and secondary outcome  
28 variables, as well as for exposure variables and potential confounding or mediating factors.  
29 Time plots for all outcome variables will be inspected. Quantitative data analysis will be  
30 conducted to assess the primary outcomes.  
31  
32  
33  
34  
35  
36  
37

38 There will be 3 analysis time points: 1) after recruitment has finished and baseline data is  
39 available for all participants (baseline analysis), 2) once every participant has completed 6  
40 months in the study (6-month analysis) and 3) at 36 months, when each participant has  
41 completed 24 months in the study (final analysis).  
42  
43  
44  
45

46 The baseline analysis will largely consist of descriptive statistics on participant characteristics  
47 and data recorded at baseline. Simple regression models will also be used to investigate  
48 relationships between exposure and outcome variables measured at baseline. Unadjusted  
49 analyses will consist of paired t-tests or Wilcoxon signed rank tests (depending whether the  
50 data are normally distributed or not) for continuously measured variables and Chi-Squared or  
51 Fisher's exact tests (depending on contingency table cell counts) for binary and categorical  
52 variables. Adjusted analyses will be conducted using generalised linear models (GLMs).  
53  
54  
55  
56  
57  
58  
59  
60

## BMJ OPEN

1  
2  
3 The 6-month analysis will be limited in scope and serves 2 purposes: 1) characterise new onset  
4 vasculopathy in HIV-infected participants that have initiated ART treatment at baseline  
5 (vascular IRIS) and 2) define vasculopathy outcomes for the final analysis. The main analysis  
6 of the study data happens at the final analysis time point.  
7  
8  
9

10  
11 For objective 1 we will develop three regression models. Two GLMs will be developed to  
12 compare mean progression of arterial damage from baseline in HIV-infected ART patients and  
13 HIV-uninfected adults. These models will regress change from baseline in PWV, respectively  
14 cIMT, on HIV status. We will develop a third model to estimate the RR and population  
15 attributable fraction of new-onset arterial damage in HIV-infected patients compared to HIV-  
16 uninfected adults.  
17  
18  
19  
20  
21  
22  
23  
24

25 For objective 2a, a set of GLMs will be developed to compare mean progression of  
26 vasculopathy in HIV-infected ART patients with and without reactivated latent herpes viral  
27 infection. These models will regress change from baseline in PWV, respectively cIMT, on two  
28 log-transformed variables for antibody titres of CMV and VZV, respectively.  
29  
30  
31  
32  
33  
34

35 For objective 2b, we will again fit a set GLMs, with change from baseline in PWV as response  
36 variable, this time to investigate if, in HIV-infected ART patients, there is an association  
37 between progression of vasculopathy and immune activation and inflammation biomarkers  
38 (IL-6, ICAM, CD163). Specifically, for each marker, we will regress PWV on marker quantiles.  
39 After having built models for each marker, we will then develop comprehensive multiple  
40 regression models for PWV and cIMT with multiple independent markers as predictor  
41 variables.  
42  
43  
44  
45  
46  
47  
48  
49

50 For objective 2c, we will proceed as for objective 2a, but comparing HIV-infected ART patients  
51 with incomplete virological suppression or virological resurgence of HIV to those with  
52 suppressed HIV plasma viral load.  
53  
54  
55  
56  
57  
58  
59  
60

BMJ OPEN

1  
2  
3 In addition to these analyses, given the repeated measurements for PWV, immune  
4 activation, inflammation markers, we will extend the GLMs for PWV to linear mixed models  
5 taking full account of the longitudinal nature of the data. Mixed models will also handle  
6 deviations from the visit schedule in a principled fashion and use all available data for drop-  
7 outs. In the case a log link function is required for PWV in the GLMs, we will fit marginalised  
8 models using GEE instead of the LMMS.  
9  
10  
11  
12  
13  
14  
15  
16

17 For secondary study objectives, we will use univariate methods to assess the frequency of  
18 clinical events within exposure strata. If there are sufficient numbers of clinical events we will  
19 develop Poisson or negative binomial regression models (depending on model fit) for each  
20 clinical event type to compare exposure-defined participants.  
21  
22  
23  
24  
25  
26

27 We will also use time-to-event models, specifically Cox proportional hazard models, to  
28 investigate associations between all-cause mortality and exposures.  
29  
30  
31  
32

33 As part of exploratory analyses, we will aim to identify risk groups that are potentially  
34 incompletely captured with the measured exposure variables. We will perform  
35 unsupervised group-based multi-trajectory modeling of multivariate longitudinal patient  
36 trajectories to confirm any associations we have found using more traditional approaches<sup>44</sup>.  
37  
38  
39  
40  
41  
42  
43

44 All efforts will be made to collect complete data on all study participants. However, there  
45 will inevitably be missing data due to drop-outs and a variety of other reasons. All primary  
46 analyses will be performed using multiple imputation. For sensitivity analyses, we will use  
47 all-available-cases (AAC), direct likelihood and fully Bayesian models and, for GEE models,  
48 weighted GEE. If the number of missingness patterns is sufficiently small, we will also use  
49 pattern mixture models which can be used under the general missing-not-at-random setting  
50 but make additional identification assumptions.  
51  
52  
53  
54  
55  
56  
57  
58  
59  
60

BMJ OPEN

**PATIENT PUBLIC INVOLVEMENT**

The global burden of HIV associated CBD and CVD has tripled over the last two decades with the greatest impact in sub-Saharan Africa. CBD and CVD are a priority for patients in Malawi as HIV infection is endemic and the population are living for longer. Knowledge of this, informed our research question with the aim of understanding the mechanisms and thus direct targeted novel therapies to reduce this burden. Patients will be involved in the recruitment of the study, but not in the design. Patients and their advisors will be thanked for contributing to the study.

**ETHICS AND DISSEMINATION**

Written informed consent will be obtained from all study participants, either written or witnessed verbal consent with thumbprint if the participant is non-literate. Study data will be maintained in an encrypted and password protected database to which only study staff will have access. Study participants who develop a clinical event will be managed, using the hospital guidelines, by our study clinician alongside the hospital doctor. Clinical data will be anonymized using unique identifying code. Study data will be kept for 10 years and then destroyed with a record, as recommended by good clinical practice guidelines. This protocol was approved by the ethics committees at University of Malawi College of Medicine (Protocol P02/16/1874) and the Liverpool School of Tropical Medicine (Protocol 16-014). Results of the main trial and each of the secondary endpoints will be submitted for publication in a peer-reviewed journal.

**DISCUSSION**

African regions continue to bear the brunt of HIV infection, in 2013, an estimated 8.5 million adults were receiving ART<sup>45</sup>. As the landscape evolves, this population will live longer with stable HIV infection but likely remain at an increased risk of CBD/CVD compared to HIV-uninfected individuals of a similar age and sex. This study will be the first to determine the extent to which HIV reactivation of herpesvirus infection and inflammation contribute to CBD/CVD risk in an adult African population starting ART. The results of this work could

BMJ OPEN

1  
2  
3 potentially open avenues for novel anti-inflammatory and anti-viral interventions for the  
4 primary prevention of CBD/CVD in HIV populations in Africa.  
5  
6  
7  
8  
9

## 10 **ACKNOWLEDGMENTS**

11 The authors would like to thank Agbor Ako and Maria Davy from Research and  
12 Development, GlaxoSmithKline and the NCD Africa Open Lab of GlaxoSmithKline review  
13 committee for providing valuable advice for this protocol. The authors would like to thank  
14 BA, MC, LH, THC, JVO, NT for their contribution to the End Point Review Committee, RD and  
15 EJ for radiology training and quality control, EZS for providing an electrocardiogram platform  
16 and for his cardiology review, VK for input with the echocardiogram protocol, and TS, JM,  
17 KM, MN for their input in the advanced drafts of the manuscript. We also extend our  
18 gratitude to the INSIGHT network for sharing their clinical endpoint criteria. LB is supported  
19 by an NIHR Clinical Lecturer Fellowship. SP is supported by an MRC (UK) core funding  
20 MC\_UU\_12023/23.  
21  
22  
23  
24  
25  
26  
27  
28  
29  
30  
31  
32  
33  
34

## 35 **AUTHORS' CONTRIBUTIONS**

36 LB and IP developed the first draft. HM, NN, KJ, CK, LA, JKT, SP, MH, JVO, RH had major input  
37 for the revision of the second draft. JH is the project manager for RHICCA with oversight  
38 from LB, IP, and HM. MH contributed to the statistical methods. LB, JKT, JVO contributed to  
39 the clinical training. SP chaired the End point Review Committee.  
40  
41  
42  
43  
44  
45  
46  
47  
48

## 49 **FUNDING STATEMENT**

50 Funding for this study was provided by the GlaxoSmithKline Africa Non-Communicable  
51 Disease Open Lab Grant (Project Number: 7964)  
52  
53  
54  
55  
56  
57

## 58 **COMPETING INTERESTS**



BMJ OPEN

SLP has academic grants from Sysmex Corporation, Gilead Sciences, and ViiV Healthcare. All other authors have no competing interest.

For peer review only

1  
2  
3  
4  
5  
6  
7  
8  
9  
10  
11  
12  
13  
14  
15  
16  
17  
18  
19  
20  
21  
22  
23  
24  
25  
26  
27  
28  
29  
30  
31  
32  
33  
34  
35  
36  
37  
38  
39  
40  
41  
42  
43  
44  
45  
46  
47  
48  
49  
50  
51  
52  
53  
54  
55  
56  
57  
58  
59  
60

BMJ OPEN

## REFERENCES

1. Roth GA, Johnson C, Abajobir A, et al. Global, Regional, and National Burden of Cardiovascular Diseases for 10 Causes, 1990 to 2015. *J Am Coll Cardiol* 2017;70(1):1-25. doi: 10.1016/j.jacc.2017.04.052
2. Organization WH. Global Update on HIV Treatment 2013: Results, Impact and Opportunities. WHO Report. Kuala Lumpur, Malaysia, 2013.
3. Macro NSONal. Malawi Demographic and Health Survey 2010. Zomba, Malawi, and Calverton, Maryland, USA: NSO and ICF Macro, 2010.
4. Freiberg MS, Chang CC, Kuller LH, et al. HIV infection and the risk of acute myocardial infarction. *JAMA Intern Med* 2013;173(8):614-22. doi: 10.1001/jamainternmed.2013.3728  
1659742 [pii] [published Online First: 2013/03/06]
5. Currier JS, Lundgren JD, Carr A, et al. Epidemiological evidence for cardiovascular disease in HIV-infected patients and relationship to highly active antiretroviral therapy. *Circulation* 2008;118(2):e29-35. doi: 10.1161/CIRCULATIONAHA.107.189624 [published Online First: 2008/06/21]
6. Butt AA, Chang CC, Kuller L, et al. Risk of heart failure with human immunodeficiency virus in the absence of prior diagnosis of coronary heart disease. *Archives of internal medicine* 2011;171(8):737-43. doi: 10.1001/archinternmed.2011.151 [published Online First: 2011/04/27]
7. Benjamin LA, Corbett EL, Connor MD, et al. HIV, antiretroviral treatment, hypertension, and stroke in Malawian adults: A case-control study. *Neurology* 2016;86(4):324-33. doi: 10.1212/WNL.0000000000002278
8. Allain TJ, Kinley L, Tsidya B, et al. The spectrum of heart disease in adults in Malawi: A review of the literature with reference to the importance of echocardiography as a diagnostic modality. *Malawi Med J* 2016;28(2):61-65. [published Online First: 2016/11/30]
9. Soliman EZ, Juma H. Cardiac disease patterns in northern Malawi: epidemiologic transition perspective. *J Epidemiol* 2008;18(5):204-8. [published Online First: 2008/08/30]
10. Syed FF, Sani MU. Recent advances in HIV-associated cardiovascular diseases in Africa. *Heart* 2013;99(16):1146-53. doi: 10.1136/heartjnl-2012-303177 [published Online First: 2013/05/18]
11. Soliman EZ, Sharma S, Arasteh K, et al. Baseline cardiovascular risk in the INSIGHT Strategic Timing of AntiRetroviral Treatment (START) trial. *HIV Med* 2015;16 Suppl 1:46-54. doi: 10.1111/hiv.12233 [published Online First: 2015/02/26]
12. Benjamin LA, Allain TJ, Mzinganjira H, et al. The Role of Human Immunodeficiency Virus-Associated Vasculopathy in the Etiology of Stroke. *J Infect Dis* 2017;216(5):545-53. doi: 10.1093/infdis/jix340 [published Online First: 2017/09/22]
13. Benjamin LA, Bryer A, Lucas S, et al. Arterial ischemic stroke in HIV: Defining and classifying etiology for research studies. *Neurol Neuroimmunol Neuroinflamm* 2016;3(4):e254. doi: 10.1212/NXI.0000000000000254
14. Nakanjako D, Kiragga A, Ibrahim F, et al. Sub-optimal CD4 reconstitution despite viral suppression in an urban cohort on antiretroviral therapy (ART) in sub-Saharan Africa: frequency and clinical significance. *AIDS Res Ther* 2008;5:23. doi: 10.1186/1742-6405-5-23 [published Online First: 2008/10/30]
15. Pawelec G, Derhovanessian E. Role of CMV in immune senescence. *Virus Res* 2011;157(2):175-9. doi: 10.1016/j.virusres.2010.09.010 [published Online First: 2010/09/28]
16. Appay V, Sauce D. Immune activation and inflammation in HIV-1 infection: causes and consequences. *J Pathol* 2008;214(2):231-41. doi: 10.1002/path.2276 [published Online First: 2007/12/29]
17. Shaw AC, Joshi S, Greenwood H, et al. Aging of the innate immune system. *Curr Opin Immunol* 2010;22(4):507-13. doi: 10.1016/j.coi.2010.05.003 [published Online First: 2010/07/30]

## BMJ OPEN

18. Hearps AC, Angelovich TA, Jaworowski A, et al. HIV infection and aging of the innate immune system. *Sex Health* 2011;8(4):453-64. doi: 10.1071/SH11028 [published Online First: 2011/12/01]
19. Kovacs EJ, Palmer JL, Fortin CF, et al. Aging and innate immunity in the mouse: impact of intrinsic and extrinsic factors. *Trends Immunol* 2009;30(7):319-24. doi: 10.1016/j.it.2009.03.012 [published Online First: 2009/06/23]
20. Hansson GK. Inflammation, atherosclerosis, and coronary artery disease. *The New England journal of medicine* 2005;352(16):1685-95. doi: 10.1056/NEJMra043430 [published Online First: 2005/04/22]
21. Boekholdt SM, Stroes ES. The interleukin-6 pathway and atherosclerosis. *Lancet* 2012;379(9822):1176-8. doi: 10.1016/S0140-6736(12)60361-4 [published Online First: 2012/03/17]
22. Duprez DA, Neuhaus J, Kuller LH, et al. Inflammation, coagulation and cardiovascular disease in HIV-infected individuals. *PLoS one* 2012;7(9):e44454. doi: 10.1371/journal.pone.0044454 [published Online First: 2012/09/13]
23. Lundgren JD, Babiker AG, Gordin F, et al. Initiation of Antiretroviral Therapy in Early Asymptomatic HIV Infection. *N Engl J Med* 2015;373(9):795-807. doi: 10.1056/NEJMoa1506816 [published Online First: 2015/07/21]
24. Eggena MP, Barugahare B, Okello M, et al. T cell activation in HIV-seropositive Ugandans: differential associations with viral load, CD4+ T cell depletion, and coinfection. *The Journal of infectious diseases* 2005;191(5):694-701. doi: 10.1086/427516 [published Online First: 2005/02/03]
25. Mussini CL, P.; Cozzi-Lepri, A.; Lapadula, G.; Marchetti, G.; Nicastri, E.; Cingolani, A.; Lichtner, M.; Antinori, A.; Gori, A.; Monforte, A. CD4/CD8 ratio normalisation and non-AIDS-related events in individuals with HIV who achieve viral load suppression with antiretroviral therapy: an observational cohort study. *Lancet HIV* 2015;2:e98–e106.
26. Sereti I, Krebs SJ, Phanuphak N, et al. Persistent, Albeit Reduced, Chronic Inflammation in Persons Starting Antiretroviral Therapy in Acute HIV Infection. *Clin Infect Dis* 2017;64(2):124-31. doi: 10.1093/cid/ciw683 [published Online First: 2016/10/16]
27. Brunner S, Herndler-Brandstetter D, Weinberger B, et al. Persistent viral infections and immune aging. *Ageing Res Rev* 2011;10(3):362-9. doi: 10.1016/j.arr.2010.08.003 [published Online First: 2010/08/24]
28. Moss P. The emerging role of cytomegalovirus in driving immune senescence: a novel therapeutic opportunity for improving health in the elderly. *Curr Opin Immunol* 2010;22(4):529-34. doi: 10.1016/j.coi.2010.07.001 [published Online First: 2010/08/06]
29. Appay V, Rowland-Jones SL. Premature ageing of the immune system: the cause of AIDS? *Trends Immunol* 2002;23(12):580-5. [published Online First: 2002/12/05]
30. Schaftenaar E, Verjans GM, Getu S, et al. High seroprevalence of human herpesviruses in HIV-infected individuals attending primary healthcare facilities in rural South Africa. *PLoS one* 2014;9(6):e99243. doi: 10.1371/journal.pone.0099243 [published Online First: 2014/06/11]
31. Hunt PW, Martin JN, Sinclair E, et al. Valganciclovir reduces T cell activation in HIV-infected individuals with incomplete CD4+ T cell recovery on antiretroviral therapy. *J Infect Dis* 2011;203(10):1474-83. doi: 10.1093/infdis/jir060 [published Online First: 2011/04/20]
32. Corbett EL. Intensified HIV/TB prevention linking home-based HIV testing, including the option of selftesting, with HIV care. ISRCTN02004005. London: ISRCTN, 2012.
33. Roth GA, Huffman MD, Moran AE, et al. Global and regional patterns in cardiovascular mortality from 1990 to 2013. *Circulation* 2015;132(17):1667-78. doi: 10.1161/CIRCULATIONAHA.114.008720
34. Maple PA, Breuer J, Quinlivan M, et al. Comparison of a commercial Varicella Zoster glycoprotein IgG enzyme immunoassay with a reference time resolved fluorescence immunoassay (VZV TRFIA) for measuring VZV IgG in sera from pregnant women, sera sent for confirmatory

## BMJ OPEN

- 1  
2  
3 testing and pre and post vOka vaccination sera from healthcare workers. *J Clin Virol*  
4 2012;53(3):201-7. doi: 10.1016/j.jcv.2011.12.010 [published Online First: 2012/01/21]  
5  
6 35. Carlier P, Harika N, Bailly R, et al. Laboratory evaluation of the new Access (R) cytomegalovirus  
7 immunoglobulin IgM and IgG assays. *J Clin Virol* 2010;49(3):192-7. doi:  
8 10.1016/j.jcv.2010.07.024 [published Online First: 2010/08/31]  
9  
10 36. Laurent S, Cockcroft J, Van Bortel L, et al. Expert consensus document on arterial stiffness:  
11 methodological issues and clinical applications. *Eur Heart J* 2006;27(21):2588-605. doi:  
12 10.1093/eurheartj/ehl254 [published Online First: 2006/09/27]  
13  
14 37. Touboul PJ, Hennerici MG, Meairs S, et al. Mannheim carotid intima-media thickness and plaque  
15 consensus (2004-2006-2011). An update on behalf of the advisory board of the 3rd, 4th and  
16 5th watching the risk symposia, at the 13th, 15th and 20th European Stroke Conferences,  
17 Mannheim, Germany, 2004, Brussels, Belgium, 2006, and Hamburg, Germany, 2011.  
18 *Cerebrovasc Dis* 2012;34(4):290-6. doi: 10.1159/000343145  
19 000343145 [pii] [published Online First: 2012/11/07]  
20  
21 38. Serina P, Riley I, Stewart A, et al. Improving performance of the Tariff Method for assigning  
22 causes of death to verbal autopsies. *BMC Med* 2015;13:291. doi: 10.1186/s12916-015-0527-  
23 9 [published Online First: 2015/12/09]  
24  
25 39. Organization WH. Consolidated ARV guidelines 2013 [Available from:  
26 <http://www.who.int/hiv/pub/guidelines/arv2013/art/artmonitoring/en/index4.html>  
27 accessed 15 Oct 2015.  
28  
29 40. Misiri HE, Edriss A, Aalen OO, et al. Estimation of HIV incidence in Malawi from cross-sectional  
30 population-based sero-prevalence data. *Journal of the International AIDS Society*  
31 2012;15(1):14. doi: 10.1186/1758-2652-15-14 [published Online First: 2012/03/16]  
32  
33 41. MacPherson P, Houben RM, Glynn JR, et al. Pre-treatment loss to follow-up in tuberculosis  
34 patients in low- and lower-middle-income countries and high-burden countries: a systematic  
35 review and meta-analysis. *Bull World Health Organ* 2014;92(2):126-38. doi:  
36 10.2471/BLT.13.124800 [published Online First: 2014/03/14]  
37  
38 42. Walker R, Whiting D, Unwin N, et al. Stroke incidence in rural and urban Tanzania: a prospective,  
39 community-based study. *Lancet Neurol* 2010;9(8):786-92. doi: S1474-4422(10)70144-7 [pii]  
40 10.1016/S1474-4422(10)70144-7 [published Online First: 2010/07/09]  
41  
42 43. von Elm E, Altman DG, Egger M, et al. The Strengthening the Reporting of Observational Studies  
43 in Epidemiology (STROBE) Statement: guidelines for reporting observational studies.  
44 *International journal of surgery* 2014;12(12):1495-9. doi: 10.1016/j.ijsu.2014.07.013  
45 [published Online First: 2014/07/22]  
46  
47 44. Nagin DS, Jones BL, Passos VL, et al. Group-based multi-trajectory modeling. *Stat Methods Med*  
48 *Res* 2018;27(7):2015-23. doi: 10.1177/0962280216673085 [published Online First:  
49 2018/05/31]  
50  
51 45. Organization WH. Global Update on the Health Sector Response to HIV 2014. Geneva: World  
52 Health Organization, 2014.  
53  
54  
55  
56  
57  
58  
59  
60

BMJ OPEN

1  
2  
3  
4  
5  
6  
7  
8  
9  
10  
11  
12  
13  
14  
15  
16  
17  
18  
19  
20  
21  
22  
23  
24  
25  
26  
27  
28  
29  
30  
31  
32  
33  
34  
35  
36  
37  
38  
39  
40  
41  
42  
43  
44  
45  
46

**Figure 1.** Hypothetical pathway of the interplay between chronic viruses, immune activation, systemic inflammation, endothelial activation, and vasculopathy.

**Figure 2.** Outline of study design for a 36-month cohort study

peer review only

BMJ OPEN

| <b>Table 1.</b> Laboratory tests and clinical procedures in ART patients and HIV-uninfected adults |                   |          |           |           |           |           |           |
|----------------------------------------------------------------------------------------------------|-------------------|----------|-----------|-----------|-----------|-----------|-----------|
|                                                                                                    | Study Time Points |          |           |           |           |           |           |
|                                                                                                    | Baseline          | 6 months | 12 months | 18 months | 24 months | 30 months | 36 months |
| <b>Clinical Procedures</b>                                                                         |                   |          |           |           |           |           |           |
| PWV                                                                                                | X                 | X        | X         | X         | X         | X         | X         |
| CIMT                                                                                               | X                 |          |           |           | X         |           |           |
| ABPI                                                                                               | X                 | X        | X         | X         | X         | X         | X         |
| Cardiac Echo ( <i>participant sub-set</i> )                                                        | X                 |          |           |           | X         |           |           |
| ECG ( <i>participant sub-set</i> )                                                                 | X                 |          |           |           | X         |           |           |
| <b>Cardiometabolic markers</b>                                                                     |                   |          |           |           |           |           |           |
| Creatinine                                                                                         | X                 |          |           |           | X         |           |           |
| Full Blood Count                                                                                   | X                 | X        |           |           |           |           |           |
| Cholesterol (LDL, HDL, Triglycerides)                                                              | X                 |          |           |           | X         |           |           |
| Serum glucose/HBA1C                                                                                | X                 |          |           |           | X         |           |           |
| <b>HIV Infection and Progression</b>                                                               |                   |          |           |           |           |           |           |
| HIV viral load ( <i>HIV patients</i> )                                                             | X                 | X        | X         |           |           |           |           |
| CD4 count ( <i>HIV patients</i> )                                                                  | X                 | X        | X         |           |           |           |           |
| HIV rapid test ( <i>controls</i> )                                                                 | X                 |          | X         |           | X         |           | X         |
| <b>Immune dysregulation</b>                                                                        |                   |          |           |           |           |           |           |
| Soluble markers of systemic inflammation                                                           | X                 | X        | X         |           |           |           |           |
| Soluble markers of endothelial activation                                                          | X                 | X        | X         |           |           |           |           |
| CD8 and CD4 T-cell activation and senescence ( <i>participant subset</i> )                         | X                 | X        | X         |           | X         |           | X         |
| Monocyte/ Macrophage activation and senescence ( <i>participant subset</i> )                       | X                 | X        | X         |           | X         |           | X         |
| <b>Herpesviruses infection</b>                                                                     |                   |          |           |           |           |           |           |
| CMV IgG                                                                                            | X                 | X        |           |           |           |           |           |
| VZV IgG                                                                                            | X                 | X        |           |           |           |           |           |

**Table 2: Case definitions of primary and secondary endpoints for the study**

| Type                                                                          | Definitions                                                                                                                                                                                                                                                                                                                                                                                                                                                                                                                                                                                                                                                                                                                                                                                                                                                                                                                                                                                  |
|-------------------------------------------------------------------------------|----------------------------------------------------------------------------------------------------------------------------------------------------------------------------------------------------------------------------------------------------------------------------------------------------------------------------------------------------------------------------------------------------------------------------------------------------------------------------------------------------------------------------------------------------------------------------------------------------------------------------------------------------------------------------------------------------------------------------------------------------------------------------------------------------------------------------------------------------------------------------------------------------------------------------------------------------------------------------------------------|
| <p><b>Primary Endpoint</b></p> <p>Carotid intimal medial thickness (CIMT)</p> | <p>The occurrence of new-onset vasculopathy [CIMT – a measure of atherosclerosis]: CIMT &gt;0.9 mm or &gt;75<sup>th</sup> percentile of age/sex references values or presence of plaque on the carotid scan</p> <p><u>Progression</u>: total change in CIMT at 24 months from baseline</p>                                                                                                                                                                                                                                                                                                                                                                                                                                                                                                                                                                                                                                                                                                   |
| <p>Pulse wave velocity (PWV)</p>                                              | <p>Occurrence of new onset vasculopathy [PWV – a measure of arterial stiffness]: PWV &gt;12[m/s]</p> <p><u>Progression</u>: total change in PWV at 24 months from baseline</p>                                                                                                                                                                                                                                                                                                                                                                                                                                                                                                                                                                                                                                                                                                                                                                                                               |
| <p><b>Secondary endpoint</b></p> <p>Stroke</p>                                | <p><b>Confirmed (1+2) or 3 or 4 or 5:</b></p> <ol style="list-style-type: none"> <li>1. Acute onset with a clinically compatible course, including unequivocal objective findings of a localizing neurologic deficit</li> <li>2. CT or MRI compatible with a diagnosis of stroke and current neurologic signs and symptoms</li> <li>3. Stroke diagnosed as the cause of death at autopsy</li> <li>4. Compatible clinical history and positive lumbar puncture compatible with subarachnoid hemorrhage</li> <li>5. Death certificate or death note from medical record listing stroke as the cause of death</li> </ol>                                                                                                                                                                                                                                                                                                                                                                        |
| <p>Myocardial Infarction [MI]</p>                                             | <p><b>Confirmed: One of the following 5 criteria (adapted from 2007 Universal Definition of Myocardial Infarction): [1 + (2 or 3 or 6)] or 4 or 5</b></p> <ol style="list-style-type: none"> <li>1. Rise and/or fall of cardiac biomarkers (preferably troponin), with at least one value above the 99th percentile of upper reference limit (URL);</li> <li>2. The occurrence of a compatible clinical syndrome, including symptoms consistent with myocardial ischemia;</li> <li>3. ECG changes indicative of new ischemia (new ST-changes or new left bundle branch block [LBBB]), or development of pathological Q waves on the ECG;</li> <li>4. Sudden unexpected cardiac death involving cardiac arrest before biomarkers are obtained or before a time when biomarkers appear, along with (a) new ST-changes or new LBB, or (b) evidence of fresh thrombus on coronary angiography or at autopsy</li> <li>5. Pathologic findings of acute myocardial infarction (including</li> </ol> |

## BMJ OPEN

|  |                                                  |                                                                                                                                                                                                                                                                                                                                                                                                                                                                                             |
|--|--------------------------------------------------|---------------------------------------------------------------------------------------------------------------------------------------------------------------------------------------------------------------------------------------------------------------------------------------------------------------------------------------------------------------------------------------------------------------------------------------------------------------------------------------------|
|  |                                                  | acute MI demonstrated as the cause of death on autopsy)<br>6. Development of a) evolving new Q waves, or b) evolving ST elevation, preferably based on at least 2 ECGs taken during the same hospital admission                                                                                                                                                                                                                                                                             |
|  | Coronary artery disease requiring drug treatment | <b>Confirmed (1 or 2) + 3:</b><br>1. Evidence of myocardial ischemia based on either diagnostic imaging (such as a stress echocardiogram or thallium scan) or diagnostic changes on an electrocardiogram (such as during stress testing or an episode of chest pain)<br>2. Evidence of coronary artery disease based on coronary angiography or other diagnostic imaging<br>3. Use of medication given to treat or prevent angina (e.g., nitrates, beta blockers, calcium channel blockers) |
|  | Peripheral vascular disease [PVD]                | <b>Confirmed (1+2) or (1+3):</b><br>1. Compatible clinical signs and symptoms<br>2. Positive results on diagnostic imaging studies (e.g., Doppler ultrasound, contrast arteriography, MRI arteriography); 3. Ankle Brachial Pressure Index < 0.90 in non-diabetics                                                                                                                                                                                                                          |
|  | Vascular Immune reconstitution syndrome (IRIS)   | A new onset vasculopathy within 6 months of starting ART                                                                                                                                                                                                                                                                                                                                                                                                                                    |
|  | All-cause death and vascular-related deaths      | Death (of any or vascular cause) that occurs after recruitment into the study                                                                                                                                                                                                                                                                                                                                                                                                               |



BMJ OPEN

1  
2  
3  
4  
5  
6  
7  
8  
9  
10  
11  
12  
13  
14  
15  
16  
17  
18  
19  
20  
21  
22  
23  
24  
25  
26  
27  
28  
29  
30  
31  
32  
33  
34  
35  
36  
37  
38  
39  
40  
41  
42  
43  
44  
45  
46

For peer review only



Figure 1

90x90mm (300 x 300 DPI)

1  
2  
3  
4  
5  
6  
7  
8  
9  
10  
11  
12  
13  
14  
15  
16  
17  
18  
19  
20  
21  
22  
23  
24  
25  
26  
27  
28  
29  
30  
31  
32  
33  
34  
35  
36  
37  
38  
39  
40  
41  
42  
43  
44  
45  
46  
47  
48  
49  
50  
51  
52  
53  
54  
55  
56  
57  
58  
59  
60

|          |          |          |          |          |          |        |
|----------|----------|----------|----------|----------|----------|--------|
| 35-39yrs | 40-44yrs | 45-49yrs | 50-55yrs | 55-59yrs | 60-64yrs | +65yrs |
|----------|----------|----------|----------|----------|----------|--------|

Cohorts will be frequency matched by 5-year age bands



Figure 2

90x90mm (300 x 300 DPI)

# RHICCA – Clinical endpoint diagnostic criteria vs 3.5 Apr 2018

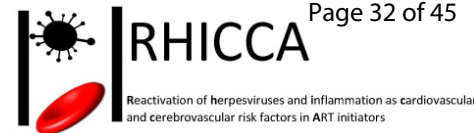

|                                           | CONFIRMED                                                                                                                                                                                                                                                                                                    | PROBABLE                                                                                                                                                                                                                                                                                                       |
|-------------------------------------------|--------------------------------------------------------------------------------------------------------------------------------------------------------------------------------------------------------------------------------------------------------------------------------------------------------------|----------------------------------------------------------------------------------------------------------------------------------------------------------------------------------------------------------------------------------------------------------------------------------------------------------------|
| <b>INFECTIONS</b>                         |                                                                                                                                                                                                                                                                                                              |                                                                                                                                                                                                                                                                                                                |
| Aspergillosis, invasive pulmonary         | <b>Confirmed: 1 + 2 + 3:</b><br>1. Compatible clinical course ( <b>Appendix 13</b> ),<br>2. CXR abnormality compatible with aspergillosis;<br>3. invasive mycelia consistent with Aspergillus on lung biopsy or positive culture of lung tissue or <b>positive culture of sputum</b> collected by any method | <b>Probable: 1 + 2 + 3:</b><br>1. Compatible clinical course ( <b>Appendix 13</b> ),<br>2. CXR abnormality compatible with aspergillosis;<br>3. invasive mycelia consistent with Aspergillus on tissue biopsy or positive culture at a normally sterile site (e.g., blood) apart from the lungs.               |
| Aspergillosis, other invasive             | <b>Confirmed: 1 + 2 + 3:</b><br>1. compatible clinical course ( <b>Appendix 11</b> ),<br>2. invasive mycelia consistent with Aspergillus on tissue biopsy or clinical evidence of infection,<br>3. positive culture from the affected tissue                                                                 | <b>Probable: 1 + 2:</b><br>1. clinical evidence of invasive infection ( <b>Appendix 11</b> ), 2. invasive mycelia consistent with Aspergillus on tissue biopsy or positive culture at a normally sterile site (e.g., blood) apart from the involved tissue                                                     |
| Bartonellosis                             | <b>Confirmed 1+ 2:</b><br>1. Clinical or histologic evidence of bacillary angiomatosis or bacillary peliosis,<br>2. a positive culture or PCR for <i>B. quintana</i> or <i>B. henselae</i>                                                                                                                   | <b>Probable 1 + 2:</b><br>1. Clinical evidence of bacillary angiomatosis or bacillary peliosis ( <b>Appendix 12</b> ),<br>2. positive silver stain for bacilli from a skin lesion or an affected organ                                                                                                         |
| Candidiasis, oral                         | <b>Confirmed: 1 + 2 + 3:</b><br>1. Macroscopic appearance on examination of the mouth<br>2. microscopic evidence of yeasts or pseudo hyphae<br>3. no evidence of oesophageal involvement                                                                                                                     | <b>Probable: 1 + 2 + 3:</b><br>1. a clinical diagnosis of oral candidiasis and/or microscopic evidence of yeasts or pseudo hyphae<br>2. clinical response to treatment<br>3. no evidence of oesophageal involvement                                                                                            |
| Candidiasis of bronchi, trachea, or lungs | <b>Confirmed: 1 + 2:</b><br>Macroscopic appearance at bronchoscopy or autopsy<br>microscopic evidence of yeasts or pseudo hyphae                                                                                                                                                                             | <b>None</b>                                                                                                                                                                                                                                                                                                    |
| Candidiasis, esophageal                   | <b>Confirmed: 1 + 2:</b><br>1. Macroscopic appearance at esophagoscopy or autopsy.<br>2. microscopic evidence of yeasts or pseudo hyphae                                                                                                                                                                     | <b>Probable: 1 + 2 + 3:</b><br>1. Recent onset of retrosternal pain or difficulty on swallowing.<br>2. a clinical diagnosis of oral candidiasis, endoscopic visualization of candidiasis and/or microscopic evidence of yeasts or pseudo hyphae from oropharyngeal mucosa<br>3. clinical response to treatment |

## RHICCA – Clinical endpoint diagnostic criteria vs 3.5 Apr 2018



|                                                 | CONFIRMED                                                                                                                                                                                                                                                                                                            | PROBABLE                                                                                                                                                                                                                                                                       |
|-------------------------------------------------|----------------------------------------------------------------------------------------------------------------------------------------------------------------------------------------------------------------------------------------------------------------------------------------------------------------------|--------------------------------------------------------------------------------------------------------------------------------------------------------------------------------------------------------------------------------------------------------------------------------|
| <b>INFECTIONS (CONTINUED)</b>                   |                                                                                                                                                                                                                                                                                                                      |                                                                                                                                                                                                                                                                                |
| Cryptococcosis, extrapulmonary (not meningitis) | <b>Confirmed: 1 or 2 or 3:</b><br><br>From tissue other than lung or hilum: <ol style="list-style-type: none"> <li>1. microscopic demonstration of narrow based budding yeast</li> <li>2. positive culture,</li> <li>3. antigen detection</li> </ol>                                                                 | None                                                                                                                                                                                                                                                                           |
| Cryptococcosis meningitis                       | <b>Confirmed: 1 or 2 or 3 or 4:</b> <ol style="list-style-type: none"> <li>1. Brain histopathology microscopic demonstration of narrow based budding yeast</li> <li>2. CSF evidence of India ink test</li> <li>3. CSF evidence of positive culture</li> <li>4. CSF evidence of positive antigen detection</li> </ol> | None                                                                                                                                                                                                                                                                           |
| Cryptosporidiosis                               | <b>Confirmed: 1 + 2</b> <ol style="list-style-type: none"> <li>1. Diarrhea for &gt; 1 month</li> <li>2. positive microscopy</li> </ol>                                                                                                                                                                               | None                                                                                                                                                                                                                                                                           |
| CMV retinitis                                   | Autopsy demonstration                                                                                                                                                                                                                                                                                                | <b>Probable 1 + 2:</b> <ol style="list-style-type: none"> <li>1. Typical appearance on fundoscopy of discrete patches of retinal whitening, spreading along blood vessels.</li> <li>2. Associated vasculitis, hemorrhage and necrosis, confirmed by ophthalmologist</li> </ol> |

|                                                | CONFIRMED                                                                                                                                                                                                                                                                                                                                      | PROBABLE                                                                                                                                                                                                                                                                                           |
|------------------------------------------------|------------------------------------------------------------------------------------------------------------------------------------------------------------------------------------------------------------------------------------------------------------------------------------------------------------------------------------------------|----------------------------------------------------------------------------------------------------------------------------------------------------------------------------------------------------------------------------------------------------------------------------------------------------|
| <b>INFECTIONS (CONTINUED)</b>                  |                                                                                                                                                                                                                                                                                                                                                |                                                                                                                                                                                                                                                                                                    |
| HZV single dermatome                           | <b>Confirmed 1+2:</b> <ol style="list-style-type: none"> <li>1. multiple ulcerated lesions affecting at least 1 dermatome, and/or 1 or more contiguous dermatomes;</li> <li>2. positive culture, PCR, or antigen assay from affected tissue</li> </ol>                                                                                         | <b>Probable 1 + 2:</b> <ol style="list-style-type: none"> <li>1. multiple typical ulcerated lesions affecting at Least 1 dermatome, and/or 1 or more contiguous dermatomes;</li> <li>2. response to an antiviral active against HZV unless resistance is demonstrated</li> </ol>                   |
| HZV, disseminated                              | <b>Confirmed 1+2:</b> <ol style="list-style-type: none"> <li>1. multiple ulcerated lesions affecting at least 2 non-contiguous dermatomes, or with generalized cutaneous dissemination HZV involvement of the lung, liver, brain, or other internal organs</li> <li>2. positive culture, PCR, or antigen assay from affected tissue</li> </ol> | <b>Probable 1+2:</b> <ol style="list-style-type: none"> <li>1. multiple typical ulcerated lesions affecting at least 2 non-contiguous dermatomes, or with generalized cutaneous dissemination</li> <li>2. response to an antiviral active against HZV unless resistance is demonstrated</li> </ol> |
| HSV mucocutaneous ulceration                   | <b>Confirmed 1 +2:</b> <ol style="list-style-type: none"> <li>1. Ulceration for &gt; 1 Month</li> <li>2. Histology, culture, PCR, or detection of antigen from affected tissue</li> </ol>                                                                                                                                                      | <b>Probable 1 + 2:</b> <ol style="list-style-type: none"> <li>1. Typical HSV ulceration for &gt; 1 month,</li> <li>2. response to an antiviral active against HZV unless resistance is demonstrated</li> </ol>                                                                                     |
| Histoplasmosis, disseminated or extrapulmonary | <b>Confirmed 1+2:</b> <ol style="list-style-type: none"> <li>1. Compatible symptoms,</li> <li>2. histology or culture or elevated blood or urine antigen levels</li> </ol>                                                                                                                                                                     | None                                                                                                                                                                                                                                                                                               |
| Isosporiasis                                   | <b>Confirmed 1 + 2:</b> <ol style="list-style-type: none"> <li>1. Diarrhea for &gt; 1 month</li> <li>2. microscopic identification of <i>Isospora belli</i></li> </ol>                                                                                                                                                                         | None                                                                                                                                                                                                                                                                                               |

# RHICCA – Clinical endpoint diagnostic criteria vs 3.5 Apr 2018



|                                                   |                                                                                                                                                                |                                                                                                                                                                                                                       |
|---------------------------------------------------|----------------------------------------------------------------------------------------------------------------------------------------------------------------|-----------------------------------------------------------------------------------------------------------------------------------------------------------------------------------------------------------------------|
| Microsporidiosis                                  | <b>Confirmed 1 + 2:</b><br>1.Diarrhea for > 1 month<br>2.Microscopic identification of Microsporidia                                                           | None                                                                                                                                                                                                                  |
| MAC and other mycobacterial disseminated diseases | <b>Confirmed 1 + 2:</b><br>1. Fever, fatigue, anemia or diarrhea<br>2. positive culture from blood, body fluids or tissue other than pulmonary, hilar or stool | <b>Probable 1+2+3:</b><br>1. Fever, fatigue, anemia or diarrhea<br>2. <b>AFB</b> or positive direct MAC PCR in blood, body fluids or tissue other than pulmonary, hilar or stool<br>3. no concurrent non-pulmonary TB |

|                                                                 | <b>CONFIRMED</b>                                                                                                                                                            | <b>PROBABLE</b>                                                                                                                                                                                                               | <b>POSSIBLE</b>                                                                                                                                                                                                                                                                                                      |
|-----------------------------------------------------------------|-----------------------------------------------------------------------------------------------------------------------------------------------------------------------------|-------------------------------------------------------------------------------------------------------------------------------------------------------------------------------------------------------------------------------|----------------------------------------------------------------------------------------------------------------------------------------------------------------------------------------------------------------------------------------------------------------------------------------------------------------------|
| <i>M. tuberculosis</i> disease, pulmonary                       | <b>Confirmed 1+2:</b><br>1. Compatible symptoms of fever, dyspnea, cough, weight loss or fatigue<br>2. culture or PCR from <b>sputum</b> or bronchial lavage or lung tissue | <b>Probable 1+2+3+4:</b><br>1. Symptoms of fever, dyspnea, cough, weight loss or fatigue<br>2. abnormal chest X-ray,<br>3. AFBs seen in sputum or lavage or lung tissue but not grown in culture,<br>4. responds to treatment | <b>Possible 1+2+3+4:</b><br>1. Symptoms of fever, dyspnea, cough, weight loss or fatigue<br>2. abnormal chest X-ray compatible with pulmonary TB (such as upper lobe cavitation, pleural exudate)<br>3. No other etiology for pulmonary symptoms and signs identified,<br>4. Responds to anti tuberculosis treatment |
| <i>M. tuberculosis</i> disease, Extrapulmonary (not meningitis) | <b>Confirmed 1+2:</b><br>1. Compatible symptoms<br>2. culture or PCR or MTB Xpert from blood or affected tissue (i.e. pericardial, ascites, and lymph glands)               | <b>Probable 1+2+3:</b><br>1. Compatible symptoms<br>2. AFBs seen from affected tissue or blood<br>3. concurrent diagnosis of pulmonary TB or responds to treatment                                                            | <b>Possible 1+2+3:</b><br>1. Compatible symptoms<br>2. No other etiology for symptoms and signs identified<br>3. concurrent diagnosis of pulmonary TB or responds to treatment                                                                                                                                       |
| <i>M. tuberculosis</i> disease, meningitis                      | <b>Confirmed 1+2:</b><br>1. Clinical symptoms of meningism ( <b>Appendix 7</b> )<br>2. Tissue/CSF culture, or PCR, or AFB or MTB Xpert                                      | <b>Probable 1+ a score ≥12 ( Appendix: Table 2):</b><br>1. Clinical symptoms of meningism ( <b>Appendix 7</b> )<br>2. A score ≥12, based on clinical, CSF, cerebral brain imaging criteria or evidence of TB elsewhere        |                                                                                                                                                                                                                                                                                                                      |
| Nocardiosis                                                     | <b>Confirmed 1+2:</b><br>1. Clinical evidence of invasive Infection ( <b>Appendix 8</b> )<br>2. a positive culture from the affected tissue or blood                        | <b>Probable 1+2:</b><br>1. Clinical evidence of invasive Infection ( <b>Appendix 8</b> )<br>2. microscopic evidence of bronchial weakly acid fast organisms from the affected tissue                                          |                                                                                                                                                                                                                                                                                                                      |

## RHICCA – Clinical endpoint diagnostic criteria vs 3.5 Apr 2018



# RHICCA

Reactivation of herpesviruses and inflammation as cardiovascular  
and cerebrovascular risk factors in ART initiators

|                                                |                                                                                                                                                                                                                                            |                                                                                                                                                                                                                                                                                                                                                                                                                                                                                            |
|------------------------------------------------|--------------------------------------------------------------------------------------------------------------------------------------------------------------------------------------------------------------------------------------------|--------------------------------------------------------------------------------------------------------------------------------------------------------------------------------------------------------------------------------------------------------------------------------------------------------------------------------------------------------------------------------------------------------------------------------------------------------------------------------------------|
| <i>Pneumocystis jirovecii</i> pulmonary        | <b>Confirmed 1+2:</b> <ol style="list-style-type: none"> <li>1. compatible clinical syndrome<br/><b>(Appendix 9)</b></li> <li>2. microscopic or histological demonstration of <i>P. jirovecii</i> cysts in a pulmonary specimen</li> </ol> | Probable 1+2+3+4+5 <ol style="list-style-type: none"> <li>1. dyspnea or cough, or fever progressive over &gt; 1 week</li> <li>2. <b>diffuse chest x-ray abnormality</b> or, if on inhalational pentamidine, diffuse upper lung field abnormality</li> <li>3. evidence of hypoxia</li> <li>4. not suggestive of bacterial pneumonia (i.e., not purulent sputum or hemoptysis, no bacterial pathogen identified in blood or bronchial wash)</li> <li>5. response to PcJ treatment</li> </ol> |
| <i>Pneumocystis jirovecii</i> , extrapulmonary | <b>Confirmed 1+2:</b> <ol style="list-style-type: none"> <li>1. compatible clinical syndrome</li> <li>2. microscopic or histological demonstration of <i>P. jirovecii</i> cysts in a tissue other than pulmonary specimen</li> </ol>       | None                                                                                                                                                                                                                                                                                                                                                                                                                                                                                       |

# RHICCA – Clinical endpoint diagnostic criteria vs 3.5 Apr 2018



|                                                                                                                                                                                                                                                                                                  | CONFIRMED                                                                                                                                                                                                                                                                                                                                                                                                                                                                                                                                                                                                                                                                                                                                                                                                                                                                                                                 | PROBABLE                                                                                                                                                                                                                                                                                                                                                                                                                                                                                                                                                                                                                                                                              |
|--------------------------------------------------------------------------------------------------------------------------------------------------------------------------------------------------------------------------------------------------------------------------------------------------|---------------------------------------------------------------------------------------------------------------------------------------------------------------------------------------------------------------------------------------------------------------------------------------------------------------------------------------------------------------------------------------------------------------------------------------------------------------------------------------------------------------------------------------------------------------------------------------------------------------------------------------------------------------------------------------------------------------------------------------------------------------------------------------------------------------------------------------------------------------------------------------------------------------------------|---------------------------------------------------------------------------------------------------------------------------------------------------------------------------------------------------------------------------------------------------------------------------------------------------------------------------------------------------------------------------------------------------------------------------------------------------------------------------------------------------------------------------------------------------------------------------------------------------------------------------------------------------------------------------------------|
| <b>INFECTIONS (CONTINUED)</b>                                                                                                                                                                                                                                                                    |                                                                                                                                                                                                                                                                                                                                                                                                                                                                                                                                                                                                                                                                                                                                                                                                                                                                                                                           |                                                                                                                                                                                                                                                                                                                                                                                                                                                                                                                                                                                                                                                                                       |
| Pneumonia, <b>SINGLE EPISODE (isolated)</b><br>bacterial, excludes: (a) post-obstructive pneumonias, including in those with intrapulmonary/bronchial lesions, (b) aspiration pneumonia, including in those with decreased consciousness levels, (c) nosocomial ventilator-associated pneumonias | <b>Confirmed 1+2+3:</b><br>pneumonia episodes must occur after enrollment;<br>1. Signs and symptoms suggestive of bacterial pneumonia ( <b>appendix 10</b> )<br>2. Focal CXR abnormality compatible with bacterial pneumonia,<br>3. identification of a bacterial pathogen by positive blood culture, positive bronchoscopic sputum culture, detection of Legionella or pneumococcal antigen in urine or blood or diagnostic serologic findings                                                                                                                                                                                                                                                                                                                                                                                                                                                                           | <b>Probable 1+2:</b><br>pneumonia episodes must occur after enrollment;<br>1. Signs and symptoms suggestive of bacterial pneumonia ( <b>Appendix 10</b> )<br>2. Focal CXR abnormality compatible with Bacterial pneumonia                                                                                                                                                                                                                                                                                                                                                                                                                                                             |
| Pneumonia, <b>recurrent</b><br>bacterial, excludes: (a) post-obstructive pneumonias, including in those with intrapulmonary/bronchial lesions, (b) aspiration pneumonia, including in those with decreased consciousness levels, (c) nosocomial ventilator-associated pneumonias                 | <b>Confirmed 1+2+3+4+5</b><br>Second pneumonia episodes must occur after enrollment and after an isolated pneumonia, within 365 days of the first episode and with strong clinical evidence that the first episode was cured;<br>1. Signs and symptoms of second event suggestive of bacterial pneumonia ( <b>Appendix 10</b> )<br>2. Focal CXR abnormality compatible with bacterial pneumonia,<br>3. identification of a bacterial pathogen by positive blood culture, positive bronchoscopic sputum culture, detection of Legionella or pneumococcal antigen in urine or blood or diagnostic serologic findings<br>4. the second pneumonia had onset of symptoms < 365 days after the first episode<br>5. there is strong evidence that the first episode was cured such as an intervening clear CXR or absence of symptoms after > 1 month off antibacterial effective against pathogens commonly producing pneumonia | <b>Probable 1+2+3+4:</b><br>Second pneumonia episodes must occur after enrollment and after an isolated pneumonia, within 365 days of the first episode and with strong clinical evidence that the first episode was cured;<br>1. Signs and symptoms suggestive of bacterial pneumonia ( <b>Appendix 10</b> )<br>2. focal CXR abnormality compatible with bacterial pneumonia<br>3. the second pneumonia had onset of symptoms < 365 days after the first episode<br>4. there is strong evidence that the first episode was cured such as an intervening clear CXR or absence of symptoms after > 1 month off antibacterials effective against pathogens commonly producing pneumonia |
| PML (progressive multifocal leukoencephalopathy)                                                                                                                                                                                                                                                 | <b>Confirmed 1 or 2:</b><br>1. positive histology,<br>2. compatible clinical ( <b>Appendix 11</b> ) and radiologic course and positive CSF PCR for JK virus                                                                                                                                                                                                                                                                                                                                                                                                                                                                                                                                                                                                                                                                                                                                                               | <b>Probable 1+2+3:</b><br>1. Consistent symptoms ( <b>Appendix 11</b> ),<br>2. brain image consistent with PML,<br>3. no response to toxo treatment or toxoplasma                                                                                                                                                                                                                                                                                                                                                                                                                                                                                                                     |
| Salmonella blood stream infection or bacteraemia, isolated                                                                                                                                                                                                                                       | <b>Confirmed 1:</b><br>A septic episode must occur after enrollment;<br>1. Positive blood or tissue culture                                                                                                                                                                                                                                                                                                                                                                                                                                                                                                                                                                                                                                                                                                                                                                                                               | None                                                                                                                                                                                                                                                                                                                                                                                                                                                                                                                                                                                                                                                                                  |
| Salmonella blood stream infection or bacteraemia, recurrent                                                                                                                                                                                                                                      | <b>Confirmed 1:</b><br>A second septic episode must occur after enrollment and after an isolated episode;<br><br>1. Has met the criteria of isolated Salmonella septicemia<br>2. Positive blood or tissue culture on the second episode<br>3. the second septicemia had onset of symptoms < 365 days after the first episode<br>4. the second septicemia must be due to a different Salmonella serotype or there must be strong evidence that the first episode was cured such as a negative blood culture off effective antibacterials for > 1 week or absence of symptoms off antibacterials for > 1 month                                                                                                                                                                                                                                                                                                              | None                                                                                                                                                                                                                                                                                                                                                                                                                                                                                                                                                                                                                                                                                  |



# RHICCA – Clinical endpoint diagnostic criteria vs 3.5 Apr 2018



|                        |                                                                                                                                                                                                                                                                 |                                                                                                                                                                                                                                                                                                         |
|------------------------|-----------------------------------------------------------------------------------------------------------------------------------------------------------------------------------------------------------------------------------------------------------------|---------------------------------------------------------------------------------------------------------------------------------------------------------------------------------------------------------------------------------------------------------------------------------------------------------|
| Toxoplasmosis of brain | <b>Confirmed 1+2+3:</b> <ol style="list-style-type: none"> <li>Compatible clinical findings (<b>Appendix 12</b>)</li> <li>Compatible radiological findings</li> <li>Detection of T gondii in the <b>CSF</b> or brain tissue (i.e. microscopy or PCR)</li> </ol> | <b>Probable 1+2+3:</b> <ol style="list-style-type: none"> <li>Symptoms of focal intracranial abnormality or decreased consciousness</li> <li>brain image consistent with lesion(s) enhanced by contrast</li> <li>positive toxoplasma serology or responds to treatment clinically or by scan</li> </ol> |
|------------------------|-----------------------------------------------------------------------------------------------------------------------------------------------------------------------------------------------------------------------------------------------------------------|---------------------------------------------------------------------------------------------------------------------------------------------------------------------------------------------------------------------------------------------------------------------------------------------------------|

|                                                              | CONFIRMED                                                                                               | PROBABLE                                                                                                                                                                                                                                                                                                                                                                                                                                                                                                                           |
|--------------------------------------------------------------|---------------------------------------------------------------------------------------------------------|------------------------------------------------------------------------------------------------------------------------------------------------------------------------------------------------------------------------------------------------------------------------------------------------------------------------------------------------------------------------------------------------------------------------------------------------------------------------------------------------------------------------------------|
| <b>NEOPLASMS</b>                                             |                                                                                                         |                                                                                                                                                                                                                                                                                                                                                                                                                                                                                                                                    |
| Cervical carcinoma, invasive                                 | <b>Confirmed 1:</b> <ol style="list-style-type: none"> <li>Histology (NOT carcinoma-in-situ)</li> </ol> | None                                                                                                                                                                                                                                                                                                                                                                                                                                                                                                                               |
| Kaposi sarcoma, (mucocutaneous or visceral)                  | <b>Confirmed 1:</b> <ol style="list-style-type: none"> <li>Histology</li> </ol>                         | <ol style="list-style-type: none"> <li>Highly typical appearance</li> <li>persistence for &gt; 1 month</li> </ol>                                                                                                                                                                                                                                                                                                                                                                                                                  |
| Lymphoma, primary, of brain                                  | <b>Confirmed 1:</b> <ol style="list-style-type: none"> <li>Histology of brain tissue</li> </ol>         | <b>Probable 1+2+3:</b> <ol style="list-style-type: none"> <li>Symptoms consistent with lymphoma</li> <li>at least one CNS lesion with mass effect</li> <li>lack of clinical or radiographic response at least 2 weeks of treatment for toxoplasmosis</li> </ol>                                                                                                                                                                                                                                                                    |
| Lymphoma, Hodgkin's                                          | <ol style="list-style-type: none"> <li>Histology</li> </ol>                                             | None                                                                                                                                                                                                                                                                                                                                                                                                                                                                                                                               |
| Lymphoma, non-Hodgkin's, all cell types                      | <b>Confirmed 1:</b> <ol style="list-style-type: none"> <li>Histology</li> </ol>                         | None                                                                                                                                                                                                                                                                                                                                                                                                                                                                                                                               |
| <b>NEUROLOGICAL</b>                                          |                                                                                                         |                                                                                                                                                                                                                                                                                                                                                                                                                                                                                                                                    |
| HIV-related encephalopathy (including AIDS Dementia Complex) | None                                                                                                    | <b>Probable 1+2+3+4:</b> <ol style="list-style-type: none"> <li>Cognitive or motor dysfunction interfering with usual activity, progressive over weeks or months</li> <li>no other condition to explain the findings</li> <li>brain image obtained and suggests no other causes</li> <li>grade 2 or worse impairment in at least 2 domains by NARS (<b>appendix – table 1</b>) excluding abnormal domains at trial entry. (For persons with abnormal domains at entry worsening by at least two grades meets criteria.)</li> </ol> |

# RHICCA – Clinical endpoint diagnostic criteria vs 3.5 Apr 2018

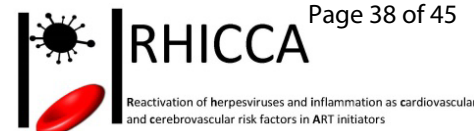

| CARDIOVASCULAR DISEASES     |                                                                                                                                                                                                                                                                                                                                                                                                                                                                                                                                                                                                                                                                                                                                                                                                                                                                                                                                                                                                                                                                                                                                                                                                                                                         |                                                                                                                                                                                                                                                                                                                                                                                                                             |
|-----------------------------|---------------------------------------------------------------------------------------------------------------------------------------------------------------------------------------------------------------------------------------------------------------------------------------------------------------------------------------------------------------------------------------------------------------------------------------------------------------------------------------------------------------------------------------------------------------------------------------------------------------------------------------------------------------------------------------------------------------------------------------------------------------------------------------------------------------------------------------------------------------------------------------------------------------------------------------------------------------------------------------------------------------------------------------------------------------------------------------------------------------------------------------------------------------------------------------------------------------------------------------------------------|-----------------------------------------------------------------------------------------------------------------------------------------------------------------------------------------------------------------------------------------------------------------------------------------------------------------------------------------------------------------------------------------------------------------------------|
| Acute Myocardial Infarction | <p><b>Confirmed: One of the following 5 criteria (adapted from 2007 Universal Definition of Myocardial Infarction): [1 + (2 or 3 or 6)] or 4 or 5</b></p> <ol style="list-style-type: none"> <li>1. Rise and/or fall of cardiac biomarkers (preferably troponin), with at least one value above 99th percentile of upper reference limit (URL);</li> <li>2. Occurrence of a compatible clinical syndrome, including symptoms (such as chest pain – <b>see Appendix 1</b>) consistent with myocardial ischemia;</li> <li>3. ECG changes indicative of new ischemia (new ST-changes or new left bundle branch block [LBBB]), or development of pathological Q waves on the ECG;</li> <li>4. Sudden unexpected cardiac death involving cardiac arrest before biomarkers are obtained or before a time when biomarkers appear, along with (a) new ST-changes or new LBB, or (b) evidence of fresh thrombus on coronary angiography or at autopsy</li> <li>5. Pathologic findings of acute myocardial infarction (including acute MI demonstrated as the cause of death on autopsy)</li> <li>6. Development of a) evolving new Q waves, or b) evolving ST elevation, preferably based on at least 2 ECGs taken during the same hospital admission</li> </ol> | <p><b>Probable 1 and 2:</b></p> <ol style="list-style-type: none"> <li>1. Occurrence of a compatible clinical syndrome (<b>Appendix 1</b>), including symptoms (such as chest pain) consistent with myocardial ischemia)</li> <li>2. Development of a) evolving new Q waves, or b) evolving ST elevation, preferably based on at least; ECGs taken during the same hospital admission.</li> </ol>                           |
| Peripheral vascular disease | <p><b>Confirmed (1+2) or (1+3):</b></p> <ol style="list-style-type: none"> <li>1. Compatible clinical signs and symptoms (<b>see Appendix 3</b>)</li> <li>2. Positive results on diagnostic imaging studies (e.g., Doppler ultrasound, contrast arteriography, MRI arteriography); 3. Ankle Brachial Pressure Index &lt; 0.90 in non-diabetics</li> </ol>                                                                                                                                                                                                                                                                                                                                                                                                                                                                                                                                                                                                                                                                                                                                                                                                                                                                                               | <p><b>Probable 1:</b></p> <ol style="list-style-type: none"> <li>1. Compatible clinical signs and symptoms (<b>see Appendix 3</b>)</li> </ol>                                                                                                                                                                                                                                                                               |
| Stroke                      | <p><b>Confirmed (1+2) or 3 or 4 or 5:</b></p> <ol style="list-style-type: none"> <li>1. Acute onset with a clinically compatible course, including unequivocal objective findings of a localizing neurologic deficit (<b>appendix 4</b>);</li> <li>2. CT or MRI compatible with diagnosis of stroke and current neurologic signs and symptoms</li> <li>3. Stroke diagnosed as cause of death at autopsy</li> <li>4. Compatible clinical history and positive lumbar puncture compatible with subarachnoid hemorrhage</li> <li>5. Death certificate or death note from medical record listing stroke as cause of death</li> </ol>                                                                                                                                                                                                                                                                                                                                                                                                                                                                                                                                                                                                                        | <p><b>Probable (1+2) or (1+3):</b></p> <ol style="list-style-type: none"> <li>1. Acute onset with a clinically compatible course, including unequivocal objective findings of a localizing neurologic deficit (<b>appendix 4</b>);</li> <li>2. Positive lumbar puncture compatible with subarachnoid hemorrhage</li> <li>3. Death certificate or death note from medical record listing stroke as cause of death</li> </ol> |
| Congestive heart failure    | <p><b>Confirmed (1+2) or (1+3) or (1+4):</b></p> <ol style="list-style-type: none"> <li>1. Clinical signs and symptoms compatible with left or right sided heart failure [<b>Appendix 5</b>] without an alternative explanation</li> <li>2. Hemodynamic measurements, radionuclide ventriculography, echocardiogram, cardiac catheterization, or multiple gated acquisition scan showing a decreased ejection fraction of &lt; 45%</li> <li>3. Echocardiogram, cardiac catheterization or other studies showing evidence of increased left atrial pressure or right heart failure;</li> <li>4. Elevated levels of Brain Natriuretic Peptide (BNP) or NT-proBNP</li> </ol>                                                                                                                                                                                                                                                                                                                                                                                                                                                                                                                                                                               | <p><b>Probable 1+2+3:</b></p> <ol style="list-style-type: none"> <li>1. Clinical signs and symptoms compatible with left or right sided heart failure [<b>Appendix 5</b>] without an alternative explanation</li> <li>2. Chest x-ray or other imaging study showing evidence of congestive heart failure, including cardiac enlargement;</li> <li>3. Documentation of treatment for congestive heart failure</li> </ol>     |

# RHICCA – Clinical endpoint diagnostic criteria vs 3.5 Apr 2018



|                                                                         |                                                                                                                                                                                                                                                                                                                                                                                                                                                                                                                                                                                                                                                                                                                                                                                                                    |                                                                                                                                                                                                                                                                                                                                                                                                                                                                                                                                                                                   |
|-------------------------------------------------------------------------|--------------------------------------------------------------------------------------------------------------------------------------------------------------------------------------------------------------------------------------------------------------------------------------------------------------------------------------------------------------------------------------------------------------------------------------------------------------------------------------------------------------------------------------------------------------------------------------------------------------------------------------------------------------------------------------------------------------------------------------------------------------------------------------------------------------------|-----------------------------------------------------------------------------------------------------------------------------------------------------------------------------------------------------------------------------------------------------------------------------------------------------------------------------------------------------------------------------------------------------------------------------------------------------------------------------------------------------------------------------------------------------------------------------------|
| Coronary artery disease requiring drug treatment                        | <b>Confirmed (1 or 2) + 3:</b> <ol style="list-style-type: none"> <li>Evidence of myocardial ischemia based on either diagnostic imaging (such as a <b>stress echocardiogram</b> or <b>thallium scan</b>) or diagnostic changes on an electrocardiogram (such as during stress testing or an episode of chest pain)</li> <li>Evidence of coronary artery disease based on <b>coronary angiography</b> or other diagnostic imaging</li> <li>Use of medication given to treat or prevent angina (e.g., nitrates, beta blockers, calcium channel blockers)</li> </ol>                                                                                                                                                                                                                                                 | <b>Probable 1+2:</b> <ol style="list-style-type: none"> <li>Other evidence of myocardial ischemia and/or coronary artery disease (including that based primarily upon symptoms and clinical presentation, such as chest pain with exertion)</li> <li>Use of medication given to treat or prevent angina (e.g., nitrates, beta blockers, calcium channel blockers)</li> </ol>                                                                                                                                                                                                      |
| Deep vein thrombosis                                                    | <b>Confirmed 1:</b> <ol style="list-style-type: none"> <li>Diagnosis of deep vein thrombosis (DVT) by contrast venography, or <b>ultrasonography</b> other comparable imaging techniques;</li> </ol>                                                                                                                                                                                                                                                                                                                                                                                                                                                                                                                                                                                                               | <b>Probable (1)+2+3:</b> <ol style="list-style-type: none"> <li>An <b>elevated D-dimer test</b>;</li> <li>A score on the Wells Clinical Prediction Rule for DVT of <math>\geq 3</math> points;</li> <li>Absence of alternative diagnosis as likely or greater than that of deep venous thrombosis.</li> </ol> <b>Wells Clinical Prediction Rule for DVT (Appendix 6)</b>                                                                                                                                                                                                          |
| <b>SYSTEMIC DISEASES</b>                                                |                                                                                                                                                                                                                                                                                                                                                                                                                                                                                                                                                                                                                                                                                                                                                                                                                    |                                                                                                                                                                                                                                                                                                                                                                                                                                                                                                                                                                                   |
| Anaemia<br>NOT FOR ERC<br>TO BE DETERMINED<br>RETROSPECTIVELY           | <b>Confirmed 1</b><br>Classified according to both WHO and DAIDS thresholds for severe/grade 3-4 anaemia                                                                                                                                                                                                                                                                                                                                                                                                                                                                                                                                                                                                                                                                                                           |                                                                                                                                                                                                                                                                                                                                                                                                                                                                                                                                                                                   |
| Chronic Kidney disease                                                  | <b>Confirmed: 1 or 2</b> <ol style="list-style-type: none"> <li>Kidney damage for &gt;3 months, as defined by structural or functional abnormalities of the kidney with or without decreased GRF, manifest by either;             <ul style="list-style-type: none"> <li>Pathological abnormalities; or</li> <li>Markers of kidney damage, including abnormalities in the composition of the blood or urine or abnormalities in imaging results</li> </ul> </li> <li>GFR &lt;60mL/min/1.73m<sup>2</sup> for &gt;3months, with or without kidney disease (estimated by <b>CKD-EPI</b>)</li> </ol>                                                                                                                                                                                                                   | <b>Confirmed: 1 or 2</b> <ol style="list-style-type: none"> <li>Isolated Kidney damage, as defined by structural or functional abnormalities of the kidney with or without decreased GRF, manifest by either;             <ul style="list-style-type: none"> <li>Pathological abnormalities; or</li> <li>Markers of kidney damage, including abnormalities in the composition of the blood or urine or abnormalities in imaging results</li> </ul> </li> <li>Isolated GFR &lt;60mL/min/1.73m<sup>2</sup>, with or without kidney disease (estimated by <b>CKD-EPI</b>)</li> </ol> |
| End-stage renal disease                                                 | <b>Confirmed: 1</b> <ol style="list-style-type: none"> <li>Hemodialysis or peritoneal dialysis documented in a clinical note for a period of at least three months;</li> </ol>                                                                                                                                                                                                                                                                                                                                                                                                                                                                                                                                                                                                                                     | <b>Probable: 1</b> <ol style="list-style-type: none"> <li>Hemodialysis or peritoneal dialysis documented in a clinical note for a period of at least one month and up to the time of death in a patient who dies within three months after dialysis begins</li> </ol>                                                                                                                                                                                                                                                                                                             |
| Diabetes Mellitus<br>NOT FOR ERC<br>TO BE DETERMINED<br>RETROSPECTIVELY | <b>Confirmed: 1 or 2 or 3 or 4</b> <ol style="list-style-type: none"> <li>Symptoms of diabetes plus casual plasma glucose concentration <math>\geq 200</math> mg/dL (11.1 mmol/L). (Casual is defined as any time of day without regard to time since last meal. The classic symptoms of diabetes include polyuria and polydipsia.)</li> <li>Fasting plasma glucose <math>\geq 126</math> mg/dL (7.0 mmol/L). (Fasting is defined as no caloric intake for at least 8 hours.)</li> <li>2-hour post-load glucose <math>\geq 200</math> mg/dL (11.1 mmol/L) during an oral glucose tolerance test. (The test should be performed as described by WHO, using glucose load containing the equivalent of 75 g anhydrous glucose dissolved in water.)</li> <li>An <b>HbA1c</b> of 48mmol/mol (6.5%) or above.</li> </ol> | <b>None</b>                                                                                                                                                                                                                                                                                                                                                                                                                                                                                                                                                                       |

# RHICCA – Clinical endpoint diagnostic criteria vs 3.5 Apr 2018

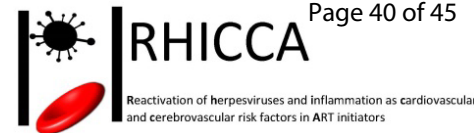

|                                                                          |                                                                                                                                                                                                                                                                                                                                                                                                                                                                                                                                                                                                                                                                                                                                                                                                                                                                                                                                                   |                                                                                                                                                                                                                                                                                                                                                                                                                                                                    |
|--------------------------------------------------------------------------|---------------------------------------------------------------------------------------------------------------------------------------------------------------------------------------------------------------------------------------------------------------------------------------------------------------------------------------------------------------------------------------------------------------------------------------------------------------------------------------------------------------------------------------------------------------------------------------------------------------------------------------------------------------------------------------------------------------------------------------------------------------------------------------------------------------------------------------------------------------------------------------------------------------------------------------------------|--------------------------------------------------------------------------------------------------------------------------------------------------------------------------------------------------------------------------------------------------------------------------------------------------------------------------------------------------------------------------------------------------------------------------------------------------------------------|
| Decompensate Liver disease                                               | <p><b>Confirmed: 1+2</b></p> <p>1. Histologic, radiographic, or ultrasound evidence of cirrhosis, as documented by one of the following:</p> <ul style="list-style-type: none"> <li>a. Histologic evidence of cirrhosis obtained by liver biopsy or autopsy</li> <li>b. MRI or CT consistent with cirrhosis</li> <li>c. A positive result on ultrasound imaging consistent with cirrhosis</li> </ul> <p>2. Clinical evidence of decompensation, as documented by one of the following, and without an alternative explanation:</p> <ul style="list-style-type: none"> <li>a. Ascites</li> <li>b. Hepatic encephalopathy</li> <li>c. Bleeding from gastric or esophageal varices</li> <li>d. Spontaneous bacterial peritonitis</li> </ul>                                                                                                                                                                                                          | <p><b>Probable: 1</b></p> <p>1. Clinical evidence of decompensation, as documented by one of the following, and without an alternative explanation:</p> <ul style="list-style-type: none"> <li>a. Ascites</li> <li>b. Hepatic encephalopathy</li> <li>c. Bleeding from gastric or esophageal varices</li> <li>d. Spontaneous bacterial peritonitis</li> </ul>                                                                                                      |
| Hypertension                                                             | <p><b>Confirmed: 1 or 2</b></p> <p>1. An average of three blood pressure (BP) readings of systolic of 140 mm Hg or above and/or diastolic of 90 mm Hg or above on the same day and persist 5-7 days after the initial reading.</p> <p>2. An isolated reading of 140mg systolic or 90mg diastolic and presence of the following end-organ disease:</p> <ul style="list-style-type: none"> <li>a. Cardiac (i.e. left ventricular hypertrophy meeting the ECG criteria [<b>Appendix 2</b>] on evidence on cardiac echocardiogram)</li> <li>b. Renal (i.e. microalbuminuria [urinary albumin excretion of 30-300mg/dl], elevated creatinine, reduced estimated GFR (60-90ml/min)</li> <li>c. Retinal(i.e. hypertensive retinal changes)</li> <li>d. Vascular disease (i.e. stroke [persisting on day 7], peripheral vascular disease, myocardial infarction, coronary artery disease requiring drug treatment, congestive cardiac failure)</li> </ul> | <p><b>Probable: 1</b></p> <p>1. An average of three BP readings of systolic of 140 mm Hg or above and/or diastolic of 90 mm Hg or above on the same day.</p>                                                                                                                                                                                                                                                                                                       |
| Hyperlipidemia<br><br>NOT FOR ERC<br>TO BE DETERMINED<br>RETROSPECTIVELY | <p><b>Confirmed: 1 or 2</b></p> <ul style="list-style-type: none"> <li>1. Fasting total cholesterol &gt;200mg/dl (&gt;5.2 mmol/L) or LDL cholesterol &gt;130mg/dl (&gt;3.4mmol/l) or Triglycerides &gt;150 mg/dl (1.7 mmol/L)</li> <li>2. Non-fasting total cholesterol &gt;240mg/dl (&gt;6.2 mmol/L) or LDL cholesterol &gt;160mg/dl (&gt;4.1 mmol/L) or Triglycerides &gt;200 mg/dl (2.3mmol/L)</li> </ul>                                                                                                                                                                                                                                                                                                                                                                                                                                                                                                                                      | <p><b>None</b></p>                                                                                                                                                                                                                                                                                                                                                                                                                                                 |
| HIV wasting syndrome                                                     | <p>None</p>                                                                                                                                                                                                                                                                                                                                                                                                                                                                                                                                                                                                                                                                                                                                                                                                                                                                                                                                       | <p><b>Probable: 1 + 2 + 3</b></p> <ul style="list-style-type: none"> <li>1. unexplained, involuntary weight loss &gt;10% from baseline,</li> <li>2. persistent diarrhea with &gt; 2 liquid stools/d for &gt; 1 month or weakness for &gt; 1 month or fever for &gt; 1 month,</li> <li>3. tests for alternate causes of weight loss, such as cancer, TB, MAC, cryptosporidiosis or other specific causes of weight loss, if obtained, should be negative</li> </ul> |



## RHICCA – Clinical endpoint diagnostic criteria vs 3.5 Apr 2018



### 4. Clinical syndrome of stroke; should meet the 3 criteria's;

|                                                                                                                                     |                                                                                                                                                                                                                                                                                                                                                                                                                                                                                                                                                                                                                                                                                                                                                                              |
|-------------------------------------------------------------------------------------------------------------------------------------|------------------------------------------------------------------------------------------------------------------------------------------------------------------------------------------------------------------------------------------------------------------------------------------------------------------------------------------------------------------------------------------------------------------------------------------------------------------------------------------------------------------------------------------------------------------------------------------------------------------------------------------------------------------------------------------------------------------------------------------------------------------------------|
| 1. <b>Sudden onset</b>                                                                                                              |                                                                                                                                                                                                                                                                                                                                                                                                                                                                                                                                                                                                                                                                                                                                                                              |
| 2. <b>Focal deficit</b> (or global disturbance but not seizures)                                                                    | <p><b>Large artery disease (anterior circulation syndrome)</b><br/>Hemi-paresis + Hemi-sensory loss + higher cortical dysfunction (gaze paresis, language impairment [expression + comprehension], visual field defect, hemi-neglect)</p> <p><b>Large artery disease (posterior circulation syndrome)</b><br/>Vertigo, visual field defect, gaze paresis, double vision, swallowing difficulty, crossed signs [contralateral limb weakness and ipsilateral cranial nerves abnormality], ataxic limb and gait, drowsy/loss of consciousness</p> <p><b>Small vessel disease (lacunar syndrome)</b><br/>Pure hemi-sensory loss<br/>Pure hemiparesis<br/>Pure sensorimotor<br/>Pure ataxic hemiparesis (including dysarthria-clumsy hand syndrome)<br/>Thunderclap headache*</p> |
| 3. <b>Lasting &gt; 24 hours</b> (<24 hours is a TIA)                                                                                |                                                                                                                                                                                                                                                                                                                                                                                                                                                                                                                                                                                                                                                                                                                                                                              |
| *seen in those with a suspicion of subarachnoid or venous stroke. In this case criteria 1 and 3 does not necessarily have to be met |                                                                                                                                                                                                                                                                                                                                                                                                                                                                                                                                                                                                                                                                                                                                                                              |

### 5. Clinical syndrome of congestive heart failure:

Using the Framingham criteria relies on clinical signs and symptoms; 1 or more major and two or more minor criteria are clinically suggestive of heart failure:

#### *Major criteria*

- A. Acute pulmonary edema
- B. Cardiomegaly
- C. Hepatojugular reflex
- D. Neck vein distention
- E. Paroxysmal nocturnal **Dyspnea** or **Orthopnea**
- F. Pulmonary crackles
- G. **Third Heart Sound (S3 Gallup Rhythm)**

#### *Minor Criteria*

- A. **Ankle edema**
- B. **Dyspnea** on exertion
- C. **Hepatomegaly**
- D. Nocturnal cough
- E. **Pleural Effusion**
- F. **Tachycardia (Heart Rate >120 beats per minute)**



## RHICCA – Clinical endpoint diagnostic criteria vs 3.5 Apr 2018



### 6. Wells Clinical Prediction Rule for DVT (Adapted from: Wells PS et al. Lancet 1997;350:1796).

One point for each of the following:

- Active cancer (treatment ongoing or within previous 6 months, or palliative)
- Paralysis, paresis, or plaster immobilization of lower extremities
- Recently bedridden for more than 3 days, or major surgery, within 4 weeks
- Localized tenderness along distribution of the deep venous system
- Entire leg swollen
- Calf swelling by more than 3 cm when compared with the asymptomatic leg (measured 10 cm below tibial tuberosity)
- Pitting edema (greater in the symptomatic leg)
- Collateral superficial veins (non-varicose)

### 7. Clinical symptoms of meningism

Meningism is the triad of nuchal **rigidity** (neck stiffness), **photophobia** (intolerance of bright light) and **headache**.

### 8. Clinical symptoms of nocardia

Symptoms vary and depend on the organs involved.

If in the lungs, symptoms may include:

- Chest pain when breathing (may occur suddenly or slowly)
- Coughing up blood
- Fevers
- Night sweats
- Weight loss

If in the brain, symptoms may include:

- Fever
- Headache
- Seizures
- If the skin is affected, symptoms may include:
  - Skin breakdown
  - Skin breakdown and abnormal passage or draining tract ([fistula](#))
  - Ulcers or nodules with infection sometimes spreading along lymph nodes

Some people with nocardia infection have no symptoms.

### 9. Symptoms of Pneumocystis Pneumonia

- Fever.
- Mild and dry cough or wheezing.
- Shortness of breath, especially with activity.
- Rapid breathing.
- Fatigue.
- Major weight loss.
- Chest pain when you breathe.

### 10. Clinical syndrome of bacterial pneumonia

- cough with thick yellow, green, or blood-tinged mucus.
- chest pain that worsens when coughing or breathing.
- sudden onset of chills.
- fever of 102°F or above (fever lower than 102°F in older persons)
- headache.
- muscle pain
- breathlessness or rapid breathing.

## RHICCA – Clinical endpoint diagnostic criteria vs 3.5 Apr 2018



### 11. Clinical finding of Central Nervous System PML

- Deficits in motor function, especially **weakness** and **clumsiness**, are common
- associated altered mental state or behaviour and fever

### 12. Clinical finding of CNS toxoplasmosis

- Headaches
- Seizures
- Focal neurological deficit of a subacute onset
- confusion and coma
- A lung infection, causing cough, fever, and shortness of breath may co-exist.
- 

### 13. Clinical symptoms suggest of Aspergillosis;

- Fever and chills.
- Cough that brings up blood-streaked sputum (hemoptysis)
- Severe bleeding from the lungs.
- Shortness of breath.
- Chest or joint pain.
- Headaches or eye symptoms.
- Nosebleed
- Facial swelling on one side

**Table 1: Abbreviated NARS (Neuropsychiatric AIDS Rating Scale) Grading for HIV Encephalopathy**

Adapted from: Price RW, Brew BJ. The AIDS dementia complex. J Infect Dis 1988; 158 (5): 1079-83, and Hughes CP, Berg L, Danziger WL. A new clinical scale for the staging of dementia. Brit J Psych 1982; 140: 566-92.

| NARS stage | Cognitive-Behavioral Domains                          |                                                     |                                                     |                                                |                                                            |                                               |
|------------|-------------------------------------------------------|-----------------------------------------------------|-----------------------------------------------------|------------------------------------------------|------------------------------------------------------------|-----------------------------------------------|
|            | Orientation                                           | Memory                                              | Motor                                               | Behavior                                       | Problem solving                                            | Activities of daily living                    |
| 0.5        | fully oriented                                        | complains of memory problems                        | fully ambulatory slightly slowed movements          | normal                                         | has slight mental slowing                                  | slight impairment in business dealings        |
| 1          | fully oriented, may have brief periods of "spaciness" | mild memory problems                                | balance, co-ordination and handwriting difficulties | more irritable, labile or apathetic, withdrawn | difficulty planning and completing work                    | can do simple daily tasks, may need prompting |
| 2          | some disorientation                                   | memory moderately impaired, new learning impaired   | ambulatory but may require walking aid              | some impulsivity or agitated behavior          | severe impairment, poor social judgement, gets lost easily | needs assistance with ADLs                    |
| 3          | frequent disorientation                               | severe memory loss, only fragments of memory remain | ambulatory with assistance                          | may have organic psychosis                     | judgement very poor                                        | cannot live independently                     |
| 4          | confused and disoriented                              | virtually no memory                                 | bedridden                                           | mute and unresponsive                          | no problem solving ability                                 | nearly vegetative                             |



# RHICCA – Clinical endpoint diagnostic criteria vs 3.5 Apr 2018



1  
2  
3  
4  
5  
6  
7  
8  
9  
10  
11  
12  
13  
14  
15  
16  
17  
18  
19  
20  
21  
22  
23  
24  
25  
26  
27  
28  
29  
30  
31  
32  
33  
34  
35  
36  
37  
38  
39  
40  
41  
42  
43  
44  
45  
46  
47  
48  
49  
50  
51  
52  
53  
54  
55  
56  
57  
58  
59  
60

For peer review only

# RHICCA – Clinical endpoint diagnostic criteria vs 3.5 Apr 2018



**Table 2: Diagnostic criteria for classification of definite, probable, possible, and not tuberculosis meningitis (Marais S, et al. Lancet Infect Dis 2010)**

|                                                                                                                                                                                                                                                                                                                                                                                                                                                                                                                                                                                                                                                                                                                        | Diagnostic score<br>(Maximum category score=6) |
|------------------------------------------------------------------------------------------------------------------------------------------------------------------------------------------------------------------------------------------------------------------------------------------------------------------------------------------------------------------------------------------------------------------------------------------------------------------------------------------------------------------------------------------------------------------------------------------------------------------------------------------------------------------------------------------------------------------------|------------------------------------------------|
| <b>Clinical criteria</b>                                                                                                                                                                                                                                                                                                                                                                                                                                                                                                                                                                                                                                                                                               | (Maximum category score=6)                     |
| Symptom duration of more than 5 days                                                                                                                                                                                                                                                                                                                                                                                                                                                                                                                                                                                                                                                                                   | 4                                              |
| Systemic symptoms suggestive of tuberculosis (one or more of the following): weight loss (or poor weight gain in children), night sweats, or persistent cough for more than 2 weeks                                                                                                                                                                                                                                                                                                                                                                                                                                                                                                                                    | 2                                              |
| History of recent (within past year) close contact with an individual with pulmonary tuberculosis or a positive TST or IGRAs (only in children <10 years of age)                                                                                                                                                                                                                                                                                                                                                                                                                                                                                                                                                       | 2                                              |
| Focal neurological deficit (excluding cranial nerve palsies)                                                                                                                                                                                                                                                                                                                                                                                                                                                                                                                                                                                                                                                           | 1                                              |
| Cranial nerve palsy                                                                                                                                                                                                                                                                                                                                                                                                                                                                                                                                                                                                                                                                                                    | 1                                              |
| Altered consciousness                                                                                                                                                                                                                                                                                                                                                                                                                                                                                                                                                                                                                                                                                                  | 1                                              |
| <b>CSF criteria</b>                                                                                                                                                                                                                                                                                                                                                                                                                                                                                                                                                                                                                                                                                                    | (Maximum category score=4)                     |
| Clear appearance                                                                                                                                                                                                                                                                                                                                                                                                                                                                                                                                                                                                                                                                                                       | 1                                              |
| Cells: 10–500 per $\mu$ l                                                                                                                                                                                                                                                                                                                                                                                                                                                                                                                                                                                                                                                                                              | 1                                              |
| Lymphocytic predominance (>50%)                                                                                                                                                                                                                                                                                                                                                                                                                                                                                                                                                                                                                                                                                        | 1                                              |
| Protein concentration greater than 1 g/L                                                                                                                                                                                                                                                                                                                                                                                                                                                                                                                                                                                                                                                                               | 1                                              |
| CSF to plasma glucose ratio of less than 50% or an absolute CSF glucose concentration less than 2.2mmol/L                                                                                                                                                                                                                                                                                                                                                                                                                                                                                                                                                                                                              | 1                                              |
| <b>Cerebral imaging criteria</b>                                                                                                                                                                                                                                                                                                                                                                                                                                                                                                                                                                                                                                                                                       | (Maximum category score=6)                     |
| Hydrocephalus                                                                                                                                                                                                                                                                                                                                                                                                                                                                                                                                                                                                                                                                                                          | 1                                              |
| Basal meningeal enhancement                                                                                                                                                                                                                                                                                                                                                                                                                                                                                                                                                                                                                                                                                            | 2                                              |
| Tuberculoma                                                                                                                                                                                                                                                                                                                                                                                                                                                                                                                                                                                                                                                                                                            | 2                                              |
| Infarct                                                                                                                                                                                                                                                                                                                                                                                                                                                                                                                                                                                                                                                                                                                | 1                                              |
| Pre-contrast basal hyperdensity                                                                                                                                                                                                                                                                                                                                                                                                                                                                                                                                                                                                                                                                                        | 2                                              |
| Evidence of tuberculosis elsewhere                                                                                                                                                                                                                                                                                                                                                                                                                                                                                                                                                                                                                                                                                     | (Maximum category score=4)                     |
| <b>Chest radiograph</b> suggestive of active tuberculosis: signs of tuberculosis=2; miliary tuberculosis=4                                                                                                                                                                                                                                                                                                                                                                                                                                                                                                                                                                                                             | 2/4                                            |
| <b>CT/ MRI/</b> ultrasound evidence for tuberculosis outside the CNS                                                                                                                                                                                                                                                                                                                                                                                                                                                                                                                                                                                                                                                   | 2                                              |
| <b>AFB</b> identified or <i>Mycobacterium tuberculosis</i> cultured from another source—ie, sputum, lymph node, gastric washing, urine, blood culture                                                                                                                                                                                                                                                                                                                                                                                                                                                                                                                                                                  | 4                                              |
| Positive commercial <i>M tuberculosis</i> NAAT from extra-neural specimen                                                                                                                                                                                                                                                                                                                                                                                                                                                                                                                                                                                                                                              | 4                                              |
| <b>Exclusion of alternative diagnoses</b>                                                                                                                                                                                                                                                                                                                                                                                                                                                                                                                                                                                                                                                                              |                                                |
| An alternative diagnosis must be confirmed microbiologically (by stain, culture, or NAAT when appropriate), serologically (eg, syphilis), or histopathologically (eg, lymphoma). The list of alternative diagnoses that should be considered, dependent upon age, immune status, and geographical region, include: pyogenic bacterial meningitis, cryptococcal meningitis, syphilitic meningitis, viral meningo-encephalitis, cerebral malaria, parasitic or eosinophilic meningitis ( <i>Angiostrongylus cantonesis</i> , <i>Gnathostoma spinigerum</i> , toxocariasis, cysticercosis), cerebral toxoplasmosis and bacterial brain abscess (space-occupying Lesion on cerebral imaging) and malignancy (eg, lymphoma) |                                                |
| TST=tuberculin skin test. IGRAs=interferon-gamma release assay. NAAT=nucleic acid amplification test. AFB=acid-fast bacilli. The individual points for each criterion (one, two, or four points) were determined by consensus and by considering their quantified diagnostic value as defined in studies.                                                                                                                                                                                                                                                                                                                                                                                                              |                                                |

**Key:**

**Bold text:** of the options available likely to be the only tool available in a Malawi setting

**Greyed out text:** ideal investigation but not available in a Malawi setting <http://www.bmj.com/site/about/guidelines.xhtml>
